# Supplementary material for: A computational reference for human genomics analysis in (poly)phenol research
Source: Royal Society of Chemistry journal article supplement (doi:10.1039/d5fo03227j), 2025-01-01
Supplement: d5fo03227j3.xlsx [file d5fo03227j3.xlsx]

## Sheet: EnrichmentTerms
category	term ID	term description	observed gene count	background gene count	strength	signal	false discovery rate	matching proteins in your network (IDs)	matching proteins in your network (labels)
GO Process	GO:0006805	Xenobiotic metabolic process	38	115	1.75	9.17	2.12e-48	9606.ENSP00000209929,9606.ENSP00000222002,9606.ENSP00000222982,9606.ENSP00000242057,9606.ENSP00000254090,9606.ENSP00000260682,9606.ENSP00000272452,9606.ENSP00000285238,9606.ENSP00000285979,9606.ENSP00000303174,9606.ENSP00000304845,9606.ENSP00000308770,9606.ENSP00000333926,9606.ENSP00000334276,9606.ENSP00000337450,9606.ENSP00000341045,9606.ENSP00000342007,9606.ENSP00000343838,9606.ENSP00000346768,…	FMO2,SULT2A1,CYP3A5,AHR,FMO5,CYP2C9,SULT1C4,ABCC3,CYP2C18,UGT1A6,UGT1A1,SULT1B1,ABCC5,UGT2B28,CYP3A7,UGT2B15,CYP1A2,UGT1A10,UGT1A9,FMO1,FMO4,CYP2C8,CYP2C19,SLC22A7,UGT1A7,UGT1A8,CYP1A1,SULT1A3,SULT1A1,SULT1A2,ABCC1,UGT2B11,UGT1A3,CYP2E1,CYP1B1,ABCC4,ABCC2,CYP3A4
GO Process	GO:0071466	Cellular response to xenobiotic stimulus	39	181	1.56	7.33	7.67e-44	9606.ENSP00000209929,9606.ENSP00000222002,9606.ENSP00000222982,9606.ENSP00000242057,9606.ENSP00000254090,9606.ENSP00000260682,9606.ENSP00000272452,9606.ENSP00000285238,9606.ENSP00000285979,9606.ENSP00000303174,9606.ENSP00000304845,9606.ENSP00000308770,9606.ENSP00000333926,9606.ENSP00000334276,9606.ENSP00000337450,9606.ENSP00000341045,9606.ENSP00000342007,9606.ENSP00000343838,9606.ENSP00000346768,…	FMO2,SULT2A1,CYP3A5,AHR,FMO5,CYP2C9,SULT1C4,ABCC3,CYP2C18,UGT1A6,UGT1A1,SULT1B1,ABCC5,UGT2B28,CYP3A7,UGT2B15,CYP1A2,UGT1A10,UGT1A9,FMO1,FMO4,CYP2C8,CYP2C19,SLC22A7,UGT1A7,UGT1A8,CYP1A1,SULT1A3,SULT1A1,SULT1A2,NFE2L2,ABCC1,UGT2B11,UGT1A3,CYP2E1,CYP1B1,ABCC4,ABCC2,CYP3A4
GO Process	GO:0009410	Response to xenobiotic stimulus	44	422	1.25	4.77	6.74e-38	9606.ENSP00000209929,9606.ENSP00000222002,9606.ENSP00000222982,9606.ENSP00000228872,9606.ENSP00000242057,9606.ENSP00000254090,9606.ENSP00000260682,9606.ENSP00000272452,9606.ENSP00000285238,9606.ENSP00000285979,9606.ENSP00000303174,9606.ENSP00000304845,9606.ENSP00000308770,9606.ENSP00000333926,9606.ENSP00000334276,9606.ENSP00000337450,9606.ENSP00000341045,9606.ENSP00000342007,9606.ENSP00000343838,…	FMO2,SULT2A1,CYP3A5,CDKN1B,AHR,FMO5,CYP2C9,SULT1C4,ABCC3,CYP2C18,UGT1A6,UGT1A1,SULT1B1,ABCC5,UGT2B28,CYP3A7,UGT2B15,CYP1A2,UGT1A10,KCNJ11,UGT1A9,FMO1,FMO4,ABCD3,CYP2C8,CYP2C19,SLC22A7,UGT1A7,UGT1A8,SLC22A12,CYP1A1,SULT1A3,SULT1A1,SULT1A2,NFE2L2,ABCC1,UGT2B11,UGT1A3,CYP2E1,ABCB1,CYP1B1,ABCC4,ABCC2,CYP3A4
GO Process	GO:0006082	Organic acid metabolic process	49	868	0.98	3.04	3.62e-31	9606.ENSP00000201586,9606.ENSP00000209929,9606.ENSP00000222002,9606.ENSP00000222982,9606.ENSP00000226444,9606.ENSP00000251566,9606.ENSP00000260010,9606.ENSP00000260682,9606.ENSP00000265403,9606.ENSP00000272452,9606.ENSP00000285979,9606.ENSP00000301891,9606.ENSP00000303174,9606.ENSP00000304811,9606.ENSP00000304845,9606.ENSP00000305221,9606.ENSP00000308770,9606.ENSP00000320401,9606.ENSP00000334276,…	SULT2B1,FMO2,SULT2A1,CYP3A5,SULT1E1,UGT2A3,TLR2,CYP2C9,UGT2B10,SULT1C4,CYP2C18,SLC22A11,UGT1A6,UGT2B7,UGT1A1,UGT2B4,SULT1B1,UGT2B17,UGT2B28,CYP3A7,UGT2B15,CYP1A2,UGT1A10,UGT1A9,FMO1,ABCD3,CYP2C8,CYP2C19,UGT1A4,UGT1A5,UGT1A7,UGT1A8,SLC22A12,PDHA1,CYP1A1,SULT1A3,SULT1A1,SULT1A2,ABCC1,UGT2B11,UGT1A3,HIF1A,CYP2E1,LDHA,SLC16A2,UGT2A2,CYP1B1,ABCG2,CYP3A4
GO Process	GO:0052695	Cellular glucuronidation	18	19	2.21	7.14	8.29e-28	9606.ENSP00000251566,9606.ENSP00000265403,9606.ENSP00000303174,9606.ENSP00000304811,9606.ENSP00000304845,9606.ENSP00000305221,9606.ENSP00000320401,9606.ENSP00000334276,9606.ENSP00000341045,9606.ENSP00000343838,9606.ENSP00000346768,9606.ENSP00000362508,9606.ENSP00000362513,9606.ENSP00000362525,9606.ENSP00000362549,9606.ENSP00000387683,9606.ENSP00000418532,9606.ENSP00000475028	UGT2A3,UGT2B10,UGT1A6,UGT2B7,UGT1A1,UGT2B4,UGT2B17,UGT2B28,UGT2B15,UGT1A10,UGT1A9,UGT1A4,UGT1A5,UGT1A7,UGT1A8,UGT2B11,UGT1A3,UGT2A2
GO Process	GO:0008202	Steroid metabolic process	31	258	1.31	4.33	2.42e-27	9606.ENSP00000201586,9606.ENSP00000222002,9606.ENSP00000222982,9606.ENSP00000226444,9606.ENSP00000260682,9606.ENSP00000265403,9606.ENSP00000304811,9606.ENSP00000304845,9606.ENSP00000305221,9606.ENSP00000320401,9606.ENSP00000332565,9606.ENSP00000334276,9606.ENSP00000337450,9606.ENSP00000341045,9606.ENSP00000342007,9606.ENSP00000359233,9606.ENSP00000360317,9606.ENSP00000360372,9606.ENSP00000362508,…	SULT2B1,SULT2A1,CYP3A5,SULT1E1,CYP2C9,UGT2B10,UGT2B7,UGT1A1,UGT2B4,UGT2B17,SULT4A1,UGT2B28,CYP3A7,UGT2B15,CYP1A2,ABCD3,CYP2C8,CYP2C19,UGT1A4,UGT1A7,UGT1A8,CYP1A1,SULT1A3,SULT1A1,SULT1A2,UGT2B11,UGT1A3,CYP2E1,UGT2A2,CYP1B1,CYP3A4
GO Process	GO:0008210	Estrogen metabolic process	20	39	1.94	6.53	2.42e-27	9606.ENSP00000222982,9606.ENSP00000226444,9606.ENSP00000260682,9606.ENSP00000265403,9606.ENSP00000304811,9606.ENSP00000304845,9606.ENSP00000305221,9606.ENSP00000320401,9606.ENSP00000334276,9606.ENSP00000337450,9606.ENSP00000341045,9606.ENSP00000342007,9606.ENSP00000360317,9606.ENSP00000362525,9606.ENSP00000378488,9606.ENSP00000378972,9606.ENSP00000387683,9606.ENSP00000418532,9606.ENSP00000478561,…	CYP3A5,SULT1E1,CYP2C9,UGT2B10,UGT2B7,UGT1A1,UGT2B4,UGT2B17,UGT2B28,CYP3A7,UGT2B15,CYP1A2,CYP2C8,UGT1A7,CYP1A1,SULT1A1,UGT2B11,UGT1A3,CYP1B1,CYP3A4
GO Process	GO:0043436	Oxoacid metabolic process	44	846	0.95	2.71	2.71e-26	9606.ENSP00000201586,9606.ENSP00000222002,9606.ENSP00000222982,9606.ENSP00000226444,9606.ENSP00000251566,9606.ENSP00000260010,9606.ENSP00000260682,9606.ENSP00000265403,9606.ENSP00000272452,9606.ENSP00000285979,9606.ENSP00000303174,9606.ENSP00000304811,9606.ENSP00000304845,9606.ENSP00000305221,9606.ENSP00000308770,9606.ENSP00000320401,9606.ENSP00000334276,9606.ENSP00000337450,9606.ENSP00000341045,…	SULT2B1,SULT2A1,CYP3A5,SULT1E1,UGT2A3,TLR2,CYP2C9,UGT2B10,SULT1C4,CYP2C18,UGT1A6,UGT2B7,UGT1A1,UGT2B4,SULT1B1,UGT2B17,UGT2B28,CYP3A7,UGT2B15,CYP1A2,UGT1A10,UGT1A9,ABCD3,CYP2C8,CYP2C19,UGT1A4,UGT1A5,UGT1A7,UGT1A8,PDHA1,CYP1A1,SULT1A3,SULT1A1,SULT1A2,ABCC1,UGT2B11,UGT1A3,HIF1A,CYP2E1,LDHA,SLC16A2,UGT2A2,CYP1B1,CYP3A4
GO Process	GO:0044281	Small molecule metabolic process	54	1645	0.75	1.93	3.81e-24	9606.ENSP00000201586,9606.ENSP00000209929,9606.ENSP00000222002,9606.ENSP00000222982,9606.ENSP00000226444,9606.ENSP00000235835,9606.ENSP00000251566,9606.ENSP00000260010,9606.ENSP00000260682,9606.ENSP00000265403,9606.ENSP00000272452,9606.ENSP00000285979,9606.ENSP00000301891,9606.ENSP00000303174,9606.ENSP00000304811,9606.ENSP00000304845,9606.ENSP00000305221,9606.ENSP00000308770,9606.ENSP00000310241,…	SULT2B1,FMO2,SULT2A1,CYP3A5,SULT1E1,AKR7A2,UGT2A3,TLR2,CYP2C9,UGT2B10,SULT1C4,CYP2C18,SLC22A11,UGT1A6,UGT2B7,UGT1A1,UGT2B4,SULT1B1,SLC22A13,UGT2B17,UGT2B28,CYP3A7,UGT2B15,CYP1A2,UGT1A10,KCNJ11,UGT1A9,FMO1,ABCD3,CYP2C8,CYP2C19,UGT1A4,UGT1A5,UGT1A7,UGT1A8,SLC22A12,PDHA1,CYP1A1,SULT1A3,SULT1A1,SULT1A2,ABCC1,UGT2B11,UGT1A3,HIF1A,CYP2E1,LDHA,AKT1,SLC16A2,UGT2A2,CYP1B1,ABCG2,PDK3,CYP3A4
GO Process	GO:0034754	Cellular hormone metabolic process	23	131	1.47	4.47	4.47e-23	9606.ENSP00000222982,9606.ENSP00000226444,9606.ENSP00000260682,9606.ENSP00000265403,9606.ENSP00000285979,9606.ENSP00000304811,9606.ENSP00000304845,9606.ENSP00000305221,9606.ENSP00000320401,9606.ENSP00000334276,9606.ENSP00000337450,9606.ENSP00000341045,9606.ENSP00000342007,9606.ENSP00000346768,9606.ENSP00000360317,9606.ENSP00000362525,9606.ENSP00000362549,9606.ENSP00000378488,9606.ENSP00000378972,…	CYP3A5,SULT1E1,CYP2C9,UGT2B10,CYP2C18,UGT2B7,UGT1A1,UGT2B4,UGT2B17,UGT2B28,CYP3A7,UGT2B15,CYP1A2,UGT1A9,CYP2C8,UGT1A7,UGT1A8,CYP1A1,SULT1A1,UGT2B11,UGT1A3,CYP1B1,CYP3A4
GO Process	GO:0042445	Hormone metabolic process	26	208	1.33	3.97	4.95e-23	9606.ENSP00000222002,9606.ENSP00000222982,9606.ENSP00000226444,9606.ENSP00000260682,9606.ENSP00000265403,9606.ENSP00000285979,9606.ENSP00000304811,9606.ENSP00000304845,9606.ENSP00000305221,9606.ENSP00000308770,9606.ENSP00000320401,9606.ENSP00000334276,9606.ENSP00000337450,9606.ENSP00000341045,9606.ENSP00000342007,9606.ENSP00000346768,9606.ENSP00000360317,9606.ENSP00000362525,9606.ENSP00000362549,…	SULT2A1,CYP3A5,SULT1E1,CYP2C9,UGT2B10,CYP2C18,UGT2B7,UGT1A1,UGT2B4,SULT1B1,UGT2B17,UGT2B28,CYP3A7,UGT2B15,CYP1A2,UGT1A9,CYP2C8,UGT1A7,UGT1A8,CYP1A1,SULT1A1,UGT2B11,UGT1A3,SLC16A2,CYP1B1,CYP3A4
GO Process	GO:0032787	Monocarboxylic acid metabolic process	34	502	1.06	2.99	6.09e-23	9606.ENSP00000222002,9606.ENSP00000222982,9606.ENSP00000251566,9606.ENSP00000260682,9606.ENSP00000265403,9606.ENSP00000285979,9606.ENSP00000303174,9606.ENSP00000304811,9606.ENSP00000304845,9606.ENSP00000305221,9606.ENSP00000320401,9606.ENSP00000334276,9606.ENSP00000337450,9606.ENSP00000341045,9606.ENSP00000342007,9606.ENSP00000343838,9606.ENSP00000346768,9606.ENSP00000359233,9606.ENSP00000360317,…	SULT2A1,CYP3A5,UGT2A3,CYP2C9,UGT2B10,CYP2C18,UGT1A6,UGT2B7,UGT1A1,UGT2B4,UGT2B17,UGT2B28,CYP3A7,UGT2B15,CYP1A2,UGT1A10,UGT1A9,ABCD3,CYP2C8,CYP2C19,UGT1A4,UGT1A5,UGT1A7,UGT1A8,PDHA1,CYP1A1,UGT2B11,UGT1A3,HIF1A,CYP2E1,LDHA,UGT2A2,CYP1B1,CYP3A4
GO Process	GO:0019752	Carboxylic acid metabolic process	37	819	0.88	2.21	1.7e-19	9606.ENSP00000222002,9606.ENSP00000222982,9606.ENSP00000251566,9606.ENSP00000260010,9606.ENSP00000260682,9606.ENSP00000265403,9606.ENSP00000285979,9606.ENSP00000303174,9606.ENSP00000304811,9606.ENSP00000304845,9606.ENSP00000305221,9606.ENSP00000320401,9606.ENSP00000334276,9606.ENSP00000337450,9606.ENSP00000341045,9606.ENSP00000342007,9606.ENSP00000343838,9606.ENSP00000346768,9606.ENSP00000359233,…	SULT2A1,CYP3A5,UGT2A3,TLR2,CYP2C9,UGT2B10,CYP2C18,UGT1A6,UGT2B7,UGT1A1,UGT2B4,UGT2B17,UGT2B28,CYP3A7,UGT2B15,CYP1A2,UGT1A10,UGT1A9,ABCD3,CYP2C8,CYP2C19,UGT1A4,UGT1A5,UGT1A7,UGT1A8,PDHA1,CYP1A1,ABCC1,UGT2B11,UGT1A3,HIF1A,CYP2E1,LDHA,SLC16A2,UGT2A2,CYP1B1,CYP3A4
GO Process	GO:0010817	Regulation of hormone levels	31	525	1	2.53	5.31e-19	9606.ENSP00000222002,9606.ENSP00000222982,9606.ENSP00000226444,9606.ENSP00000260682,9606.ENSP00000265403,9606.ENSP00000279178,9606.ENSP00000285979,9606.ENSP00000304811,9606.ENSP00000304845,9606.ENSP00000305221,9606.ENSP00000308770,9606.ENSP00000320401,9606.ENSP00000334276,9606.ENSP00000337450,9606.ENSP00000341045,9606.ENSP00000342007,9606.ENSP00000345708,9606.ENSP00000346768,9606.ENSP00000351407,…	SULT2A1,CYP3A5,SULT1E1,CYP2C9,UGT2B10,SLC22A9,CYP2C18,UGT2B7,UGT1A1,UGT2B4,SULT1B1,UGT2B17,UGT2B28,CYP3A7,UGT2B15,CYP1A2,KCNJ11,UGT1A9,ARNT,CYP2C8,UGT1A7,UGT1A8,CYP1A1,SULT1A1,UGT2B11,UGT1A3,HIF1A,SLC16A1,SLC16A2,CYP1B1,CYP3A4
GO Process	GO:0009812	Flavonoid metabolic process	12	14	2.16	4.64	7.51e-18	9606.ENSP00000264162,9606.ENSP00000272452,9606.ENSP00000304845,9606.ENSP00000308770,9606.ENSP00000343838,9606.ENSP00000346768,9606.ENSP00000362525,9606.ENSP00000362549,9606.ENSP00000378488,9606.ENSP00000378570,9606.ENSP00000378972,9606.ENSP00000418532	LCT,SULT1C4,UGT1A1,SULT1B1,UGT1A10,UGT1A9,UGT1A7,UGT1A8,CYP1A1,SULT1A3,SULT1A1,UGT1A3
GO Process	GO:1901615	Organic hydroxy compound metabolic process	28	478	1	2.37	7.83e-17	9606.ENSP00000201586,9606.ENSP00000222002,9606.ENSP00000222982,9606.ENSP00000226444,9606.ENSP00000235835,9606.ENSP00000260682,9606.ENSP00000264162,9606.ENSP00000272452,9606.ENSP00000285979,9606.ENSP00000308770,9606.ENSP00000337450,9606.ENSP00000342007,9606.ENSP00000354511,9606.ENSP00000359233,9606.ENSP00000360317,9606.ENSP00000362508,9606.ENSP00000378488,9606.ENSP00000378570,9606.ENSP00000378972,…	SULT2B1,SULT2A1,CYP3A5,SULT1E1,AKR7A2,CYP2C9,LCT,SULT1C4,CYP2C18,SULT1B1,CYP3A7,CYP1A2,COMT,ABCD3,CYP2C8,UGT1A4,CYP1A1,SULT1A3,SULT1A1,SULT1A2,UGT1A3,HIF1A,CYP2E1,LDHA,SLC16A2,UGT2A2,CYP1B1,CYP3A4
GO Process	GO:0006629	Lipid metabolic process	40	1210	0.75	1.71	9.28e-17	9606.ENSP00000201586,9606.ENSP00000222002,9606.ENSP00000222982,9606.ENSP00000226444,9606.ENSP00000235835,9606.ENSP00000254090,9606.ENSP00000260682,9606.ENSP00000264162,9606.ENSP00000265403,9606.ENSP00000285979,9606.ENSP00000304811,9606.ENSP00000304845,9606.ENSP00000305221,9606.ENSP00000311648,9606.ENSP00000320401,9606.ENSP00000332565,9606.ENSP00000334276,9606.ENSP00000337450,9606.ENSP00000341045,…	SULT2B1,SULT2A1,CYP3A5,SULT1E1,AKR7A2,FMO5,CYP2C9,LCT,UGT2B10,CYP2C18,UGT2B7,UGT1A1,UGT2B4,UGT8,UGT2B17,SULT4A1,UGT2B28,CYP3A7,UGT2B15,CYP1A2,UGT1A10,UGT1A9,COMT,ABCD3,CYP2C8,CYP2C19,UGT1A4,UGT1A7,UGT1A8,CYP1A1,SULT1A3,SULT1A1,SULT1A2,UGT2B11,UGT1A3,CYP2E1,SLC16A1,UGT2A2,CYP1B1,CYP3A4
GO Process	GO:0015711	Organic anion transport	24	328	1.09	2.57	3.49e-16	9606.ENSP00000279178,9606.ENSP00000285238,9606.ENSP00000301891,9606.ENSP00000310241,9606.ENSP00000319991,9606.ENSP00000321735,9606.ENSP00000323568,9606.ENSP00000327569,9606.ENSP00000333926,9606.ENSP00000358794,9606.ENSP00000359233,9606.ENSP00000361666,9606.ENSP00000366797,9606.ENSP00000367102,9606.ENSP00000382342,9606.ENSP00000390564,9606.ENSP00000418532,9606.ENSP00000441065,9606.ENSP00000448071,…	SLC22A9,ABCC3,SLC22A11,SLC22A13,SLC16A6,SLC16A8,SLC2A2,SLC22A10,ABCC5,SLC16A4,ABCD3,SLC22A7,SLC22A12,SLC22A6,ABCC1,SLC16A5,UGT1A3,SLC16A1,SLC16A7,SLC16A3,SLC16A2,ABCC4,ABCC2,ABCG2
GO Process	GO:0045922	Negative regulation of fatty acid metabolic process	13	39	1.75	3.7	1.86e-15	9606.ENSP00000209929,9606.ENSP00000303174,9606.ENSP00000304845,9606.ENSP00000310241,9606.ENSP00000343838,9606.ENSP00000346768,9606.ENSP00000346901,9606.ENSP00000356723,9606.ENSP00000362508,9606.ENSP00000362525,9606.ENSP00000362549,9606.ENSP00000418532,9606.ENSP00000451828	FMO2,UGT1A6,UGT1A1,SLC22A13,UGT1A10,UGT1A9,FMO1,FMO4,UGT1A4,UGT1A7,UGT1A8,UGT1A3,AKT1
GO Process	GO:0070887	Cellular response to chemical stimulus	54	2609	0.55	1.21	3.26e-15	9606.ENSP00000209929,9606.ENSP00000222002,9606.ENSP00000222982,9606.ENSP00000225831,9606.ENSP00000228872,9606.ENSP00000242057,9606.ENSP00000254090,9606.ENSP00000260010,9606.ENSP00000260682,9606.ENSP00000272452,9606.ENSP00000285238,9606.ENSP00000285979,9606.ENSP00000300589,9606.ENSP00000303174,9606.ENSP00000304845,9606.ENSP00000308770,9606.ENSP00000333926,9606.ENSP00000334276,9606.ENSP00000337450,…	FMO2,SULT2A1,CYP3A5,CCL2,CDKN1B,AHR,FMO5,TLR2,CYP2C9,SULT1C4,ABCC3,CYP2C18,NOD2,UGT1A6,UGT1A1,SULT1B1,ABCC5,UGT2B28,CYP3A7,UGT2B15,CYP1A2,UGT1A10,UGT1A9,FMO1,ARNT,FMO4,CYP2C8,CYP2C19,SLC22A7,UGT1A7,UGT1A8,TLR4,SLC22A12,CYP1A1,SULT1A3,SULT1A1,SULT1A2,NFE2L2,ABCC1,UGT2B11,UGT1A3,PPIA,HIF1A,CYP2E1,SLC16A1,AKT1,CYP1B1,ABCC4,TLR5,ABCC2,ABCG2,MYD88,PDK3,CYP3A4
GO Process	GO:0006721	Terpenoid metabolic process	16	99	1.44	3.18	4.12e-15	9606.ENSP00000222982,9606.ENSP00000260682,9606.ENSP00000285979,9606.ENSP00000304845,9606.ENSP00000337450,9606.ENSP00000342007,9606.ENSP00000346768,9606.ENSP00000360317,9606.ENSP00000360372,9606.ENSP00000362525,9606.ENSP00000362549,9606.ENSP00000378488,9606.ENSP00000418532,9606.ENSP00000440689,9606.ENSP00000478561,9606.ENSP00000498939	CYP3A5,CYP2C9,CYP2C18,UGT1A1,CYP3A7,CYP1A2,UGT1A9,CYP2C8,CYP2C19,UGT1A7,UGT1A8,CYP1A1,UGT1A3,CYP2E1,CYP1B1,CYP3A4
GO Process	GO:0034308	Primary alcohol metabolic process	16	99	1.44	3.18	4.12e-15	9606.ENSP00000222002,9606.ENSP00000222982,9606.ENSP00000226444,9606.ENSP00000235835,9606.ENSP00000272452,9606.ENSP00000285979,9606.ENSP00000308770,9606.ENSP00000337450,9606.ENSP00000342007,9606.ENSP00000360317,9606.ENSP00000378488,9606.ENSP00000378570,9606.ENSP00000378972,9606.ENSP00000378992,9606.ENSP00000478561,9606.ENSP00000498939	SULT2A1,CYP3A5,SULT1E1,AKR7A2,SULT1C4,CYP2C18,SULT1B1,CYP3A7,CYP1A2,CYP2C8,CYP1A1,SULT1A3,SULT1A1,SULT1A2,CYP1B1,CYP3A4
GO Process	GO:0015718	Monocarboxylic acid transport	16	108	1.4	3.03	1.32e-14	9606.ENSP00000279178,9606.ENSP00000285238,9606.ENSP00000310241,9606.ENSP00000319991,9606.ENSP00000321735,9606.ENSP00000358794,9606.ENSP00000359233,9606.ENSP00000390564,9606.ENSP00000418532,9606.ENSP00000441065,9606.ENSP00000448071,9606.ENSP00000463978,9606.ENSP00000465734,9606.ENSP00000494609,9606.ENSP00000497274,9606.ENSP00000498246	SLC22A9,ABCC3,SLC22A13,SLC16A6,SLC16A8,SLC16A4,ABCD3,SLC16A5,UGT1A3,SLC16A1,SLC16A7,SLC16A3,SLC16A2,ABCC4,ABCC2,ABCG2
GO Process	GO:0006820	Anion transport	25	469	0.96	2.05	5.23e-14	9606.ENSP00000279178,9606.ENSP00000285238,9606.ENSP00000301891,9606.ENSP00000310241,9606.ENSP00000319991,9606.ENSP00000321735,9606.ENSP00000323568,9606.ENSP00000327569,9606.ENSP00000333926,9606.ENSP00000337335,9606.ENSP00000358794,9606.ENSP00000359233,9606.ENSP00000361666,9606.ENSP00000366797,9606.ENSP00000367102,9606.ENSP00000382342,9606.ENSP00000390564,9606.ENSP00000418532,9606.ENSP00000441065,…	SLC22A9,ABCC3,SLC22A11,SLC22A13,SLC16A6,SLC16A8,SLC2A2,SLC22A10,ABCC5,SLC22A8,SLC16A4,ABCD3,SLC22A7,SLC22A12,SLC22A6,ABCC1,SLC16A5,UGT1A3,SLC16A1,SLC16A7,SLC16A3,SLC16A2,ABCC4,ABCC2,ABCG2
GO Process	GO:1905039	Carboxylic acid transmembrane transport	18	193	1.2	2.49	1.88e-13	9606.ENSP00000279178,9606.ENSP00000285238,9606.ENSP00000310241,9606.ENSP00000319991,9606.ENSP00000321735,9606.ENSP00000333926,9606.ENSP00000358794,9606.ENSP00000359233,9606.ENSP00000382342,9606.ENSP00000390564,9606.ENSP00000441065,9606.ENSP00000448071,9606.ENSP00000463978,9606.ENSP00000465734,9606.ENSP00000478255,9606.ENSP00000494609,9606.ENSP00000497274,9606.ENSP00000498246	SLC22A9,ABCC3,SLC22A13,SLC16A6,SLC16A8,ABCC5,SLC16A4,ABCD3,ABCC1,SLC16A5,SLC16A1,SLC16A7,SLC16A3,SLC16A2,ABCB1,ABCC4,ABCC2,ABCG2
GO Process	GO:0042573	Retinoic acid metabolic process	11	32	1.77	3.18	4.38e-13	9606.ENSP00000222982,9606.ENSP00000285979,9606.ENSP00000304845,9606.ENSP00000337450,9606.ENSP00000346768,9606.ENSP00000360317,9606.ENSP00000362525,9606.ENSP00000362549,9606.ENSP00000378488,9606.ENSP00000418532,9606.ENSP00000498939	CYP3A5,CYP2C18,UGT1A1,CYP3A7,UGT1A9,CYP2C8,UGT1A7,UGT1A8,CYP1A1,UGT1A3,CYP3A4
GO Process	GO:0046942	Carboxylic acid transport	19	249	1.11	2.25	7.44e-13	9606.ENSP00000279178,9606.ENSP00000285238,9606.ENSP00000310241,9606.ENSP00000319991,9606.ENSP00000321735,9606.ENSP00000333926,9606.ENSP00000358794,9606.ENSP00000359233,9606.ENSP00000367102,9606.ENSP00000382342,9606.ENSP00000390564,9606.ENSP00000418532,9606.ENSP00000441065,9606.ENSP00000448071,9606.ENSP00000463978,9606.ENSP00000465734,9606.ENSP00000494609,9606.ENSP00000497274,9606.ENSP00000498246	SLC22A9,ABCC3,SLC22A13,SLC16A6,SLC16A8,ABCC5,SLC16A4,ABCD3,SLC22A6,ABCC1,SLC16A5,UGT1A3,SLC16A1,SLC16A7,SLC16A3,SLC16A2,ABCC4,ABCC2,ABCG2
GO Process	GO:0019748	Secondary metabolic process	12	51	1.6	2.96	9.21e-13	9606.ENSP00000209929,9606.ENSP00000222982,9606.ENSP00000235835,9606.ENSP00000272452,9606.ENSP00000342007,9606.ENSP00000346901,9606.ENSP00000362525,9606.ENSP00000362549,9606.ENSP00000378488,9606.ENSP00000380252,9606.ENSP00000478561,9606.ENSP00000498939	FMO2,CYP3A5,AKR7A2,SULT1C4,CYP1A2,FMO1,UGT1A7,UGT1A8,CYP1A1,NFE2L2,CYP1B1,CYP3A4
GO Process	GO:0019217	Regulation of fatty acid metabolic process	14	94	1.4	2.71	1.04e-12	9606.ENSP00000209929,9606.ENSP00000303174,9606.ENSP00000304845,9606.ENSP00000310241,9606.ENSP00000343838,9606.ENSP00000346768,9606.ENSP00000346901,9606.ENSP00000356723,9606.ENSP00000362508,9606.ENSP00000362525,9606.ENSP00000362549,9606.ENSP00000418532,9606.ENSP00000451828,9606.ENSP00000498864	FMO2,UGT1A6,UGT1A1,SLC22A13,UGT1A10,UGT1A9,FMO1,FMO4,UGT1A4,UGT1A7,UGT1A8,UGT1A3,AKT1,PDK3
GO Process	GO:0051923	Sulfation	10	24	1.85	3.11	1.71e-12	9606.ENSP00000201586,9606.ENSP00000222002,9606.ENSP00000226444,9606.ENSP00000272452,9606.ENSP00000308770,9606.ENSP00000319622,9606.ENSP00000332565,9606.ENSP00000378570,9606.ENSP00000378972,9606.ENSP00000378992	SULT2B1,SULT2A1,SULT1E1,SULT1C4,SULT1B1,SULT1C2,SULT4A1,SULT1A3,SULT1A1,SULT1A2
GO Process	GO:0015849	Organic acid transport	19	278	1.06	2.08	4.32e-12	9606.ENSP00000279178,9606.ENSP00000285238,9606.ENSP00000310241,9606.ENSP00000319991,9606.ENSP00000321735,9606.ENSP00000333926,9606.ENSP00000358794,9606.ENSP00000359233,9606.ENSP00000367102,9606.ENSP00000382342,9606.ENSP00000390564,9606.ENSP00000441065,9606.ENSP00000448071,9606.ENSP00000463978,9606.ENSP00000465734,9606.ENSP00000478255,9606.ENSP00000494609,9606.ENSP00000497274,9606.ENSP00000498246	SLC22A9,ABCC3,SLC22A13,SLC16A6,SLC16A8,ABCC5,SLC16A4,ABCD3,SLC22A6,ABCC1,SLC16A5,SLC16A1,SLC16A7,SLC16A3,SLC16A2,ABCB1,ABCC4,ABCC2,ABCG2
GO Process	GO:0006066	Alcohol metabolic process	20	324	1.02	1.99	4.82e-12	9606.ENSP00000201586,9606.ENSP00000222002,9606.ENSP00000222982,9606.ENSP00000226444,9606.ENSP00000235835,9606.ENSP00000260682,9606.ENSP00000272452,9606.ENSP00000285979,9606.ENSP00000308770,9606.ENSP00000337450,9606.ENSP00000342007,9606.ENSP00000360317,9606.ENSP00000362508,9606.ENSP00000378488,9606.ENSP00000378570,9606.ENSP00000378972,9606.ENSP00000378992,9606.ENSP00000418532,9606.ENSP00000478561,…	SULT2B1,SULT2A1,CYP3A5,SULT1E1,AKR7A2,CYP2C9,SULT1C4,CYP2C18,SULT1B1,CYP3A7,CYP1A2,CYP2C8,UGT1A4,CYP1A1,SULT1A3,SULT1A1,SULT1A2,UGT1A3,CYP1B1,CYP3A4
GO Process	GO:1904224	Negative regulation of glucuronosyltransferase activity	8	8	2.23	3.14	5.66e-12	9606.ENSP00000303174,9606.ENSP00000304845,9606.ENSP00000343838,9606.ENSP00000346768,9606.ENSP00000362508,9606.ENSP00000362525,9606.ENSP00000362549,9606.ENSP00000418532	UGT1A6,UGT1A1,UGT1A10,UGT1A9,UGT1A4,UGT1A7,UGT1A8,UGT1A3
GO Process	GO:2001030	Negative regulation of cellular glucuronidation	8	8	2.23	3.14	5.66e-12	9606.ENSP00000303174,9606.ENSP00000304845,9606.ENSP00000343838,9606.ENSP00000346768,9606.ENSP00000362508,9606.ENSP00000362525,9606.ENSP00000362549,9606.ENSP00000418532	UGT1A6,UGT1A1,UGT1A10,UGT1A9,UGT1A4,UGT1A7,UGT1A8,UGT1A3
GO Process	GO:0001523	Retinoid metabolic process	13	85	1.41	2.58	6.61e-12	9606.ENSP00000222982,9606.ENSP00000285979,9606.ENSP00000304845,9606.ENSP00000337450,9606.ENSP00000342007,9606.ENSP00000346768,9606.ENSP00000360317,9606.ENSP00000362525,9606.ENSP00000362549,9606.ENSP00000378488,9606.ENSP00000418532,9606.ENSP00000478561,9606.ENSP00000498939	CYP3A5,CYP2C18,UGT1A1,CYP3A7,CYP1A2,UGT1A9,CYP2C8,UGT1A7,UGT1A8,CYP1A1,UGT1A3,CYP1B1,CYP3A4
GO Process	GO:0150104	Transport across blood-brain barrier	13	86	1.41	2.56	7.39e-12	9606.ENSP00000266088,9606.ENSP00000285238,9606.ENSP00000333926,9606.ENSP00000337335,9606.ENSP00000382342,9606.ENSP00000402760,9606.ENSP00000441065,9606.ENSP00000448071,9606.ENSP00000465734,9606.ENSP00000478255,9606.ENSP00000494609,9606.ENSP00000497274,9606.ENSP00000498246	SLC5A1,ABCC3,ABCC5,SLC22A8,ABCC1,SLC22A5,SLC16A1,SLC16A7,SLC16A2,ABCB1,ABCC4,ABCC2,ABCG2
GO Process	GO:0042221	Response to chemical	61	4010	0.41	0.9	7.67e-12	9606.ENSP00000209929,9606.ENSP00000222002,9606.ENSP00000222982,9606.ENSP00000225831,9606.ENSP00000228872,9606.ENSP00000242057,9606.ENSP00000254090,9606.ENSP00000260010,9606.ENSP00000260682,9606.ENSP00000266088,9606.ENSP00000272452,9606.ENSP00000285238,9606.ENSP00000285979,9606.ENSP00000300589,9606.ENSP00000303174,9606.ENSP00000304845,9606.ENSP00000308770,9606.ENSP00000333926,9606.ENSP00000334276,…	FMO2,SULT2A1,CYP3A5,CCL2,CDKN1B,AHR,FMO5,TLR2,CYP2C9,SLC5A1,SULT1C4,ABCC3,CYP2C18,NOD2,UGT1A6,UGT1A1,SULT1B1,ABCC5,UGT2B28,SLC22A8,CYP3A7,UGT2B15,CYP1A2,UGT1A10,KCNJ11,UGT1A9,FMO1,ARNT,FMO4,ABCD3,CYP2C8,CYP2C19,SLC22A7,UGT1A7,UGT1A8,TLR4,SLC22A12,SLC22A6,CYP1A1,SULT1A3,SULT1A1,SULT1A2,NFE2L2,ABCC1,UGT2B11,SLC22A5,UGT1A3,PPIA,HIF1A,CYP2E1,SLC16A1,AKT1,ABCB1,CYP1B1,ABCC4,TLR5,ABCC2,ABCG2,MYD88,PDK3…
GO Process	GO:0042178	Xenobiotic catabolic process	9	25	1.79	2.66	8.75e-11	9606.ENSP00000222982,9606.ENSP00000260682,9606.ENSP00000304845,9606.ENSP00000342007,9606.ENSP00000356723,9606.ENSP00000360317,9606.ENSP00000360372,9606.ENSP00000378488,9606.ENSP00000498939	CYP3A5,CYP2C9,UGT1A1,CYP1A2,FMO4,CYP2C8,CYP2C19,CYP1A1,CYP3A4
GO Process	GO:0052697	Xenobiotic glucuronidation	7	7	2.23	2.72	2.04e-10	9606.ENSP00000304845,9606.ENSP00000334276,9606.ENSP00000346768,9606.ENSP00000362525,9606.ENSP00000362549,9606.ENSP00000387683,9606.ENSP00000418532	UGT1A1,UGT2B28,UGT1A9,UGT1A7,UGT1A8,UGT2B11,UGT1A3
GO Process	GO:0009404	Toxin metabolic process	8	18	1.88	2.52	4.75e-10	9606.ENSP00000209929,9606.ENSP00000222982,9606.ENSP00000342007,9606.ENSP00000346901,9606.ENSP00000378488,9606.ENSP00000380252,9606.ENSP00000478561,9606.ENSP00000498939	FMO2,CYP3A5,CYP1A2,FMO1,CYP1A1,NFE2L2,CYP1B1,CYP3A4
GO Process	GO:0019373	Epoxygenase P450 pathway	8	18	1.88	2.52	4.75e-10	9606.ENSP00000260682,9606.ENSP00000285979,9606.ENSP00000342007,9606.ENSP00000360317,9606.ENSP00000360372,9606.ENSP00000378488,9606.ENSP00000440689,9606.ENSP00000478561	CYP2C9,CYP2C18,CYP1A2,CYP2C8,CYP2C19,CYP1A1,CYP2E1,CYP1B1
GO Process	GO:0050427	3-phosphoadenosine 5-phosphosulfate metabolic process	8	21	1.81	2.39	1.24e-09	9606.ENSP00000201586,9606.ENSP00000222002,9606.ENSP00000226444,9606.ENSP00000272452,9606.ENSP00000308770,9606.ENSP00000378570,9606.ENSP00000378972,9606.ENSP00000378992	SULT2B1,SULT2A1,SULT1E1,SULT1C4,SULT1B1,SULT1A3,SULT1A1,SULT1A2
GO Process	GO:0065008	Regulation of biological quality	54	3654	0.4	0.82	1.98e-09	9606.ENSP00000209929,9606.ENSP00000222002,9606.ENSP00000222982,9606.ENSP00000225831,9606.ENSP00000226444,9606.ENSP00000260010,9606.ENSP00000260682,9606.ENSP00000265403,9606.ENSP00000279178,9606.ENSP00000285979,9606.ENSP00000296420,9606.ENSP00000300589,9606.ENSP00000302716,9606.ENSP00000304811,9606.ENSP00000304845,9606.ENSP00000305221,9606.ENSP00000308770,9606.ENSP00000320401,9606.ENSP00000334276,…	FMO2,SULT2A1,CYP3A5,CCL2,SULT1E1,TLR2,CYP2C9,UGT2B10,SLC22A9,CYP2C18,EMCN,NOD2,MUC17,UGT2B7,UGT1A1,UGT2B4,SULT1B1,UGT2B17,UGT2B28,CYP3A7,UGT2B15,CYP1A2,KCNJ11,UGT1A9,FMO1,ARNT,COMT,FMO4,CYP2C8,UGT1A7,UGT1A8,TLR4,SLC22A12,CYP1A1,SULT1A1,NFE2L2,ABCC1,UGT2B11,SLC22A5,MUC6,MUC4,UGT1A3,PPIA,HIF1A,SLC16A1,AKT1,SLC16A2,ABCB1,CYP1B1,MUC13,MUC2,MYD88,PDK3,CYP3A4
GO Process	GO:0006068	Ethanol catabolic process	7	13	1.96	2.31	4e-09	9606.ENSP00000222002,9606.ENSP00000226444,9606.ENSP00000272452,9606.ENSP00000308770,9606.ENSP00000378570,9606.ENSP00000378972,9606.ENSP00000378992	SULT2A1,SULT1E1,SULT1C4,SULT1B1,SULT1A3,SULT1A1,SULT1A2
GO Process	GO:0062012	Regulation of small molecule metabolic process	17	330	0.94	1.53	5.42e-09	9606.ENSP00000209929,9606.ENSP00000254090,9606.ENSP00000303174,9606.ENSP00000304845,9606.ENSP00000310241,9606.ENSP00000343838,9606.ENSP00000346768,9606.ENSP00000346901,9606.ENSP00000351407,9606.ENSP00000356723,9606.ENSP00000362508,9606.ENSP00000362525,9606.ENSP00000362549,9606.ENSP00000418532,9606.ENSP00000437955,9606.ENSP00000451828,9606.ENSP00000498864	FMO2,FMO5,UGT1A6,UGT1A1,SLC22A13,UGT1A10,UGT1A9,FMO1,ARNT,FMO4,UGT1A4,UGT1A7,UGT1A8,UGT1A3,HIF1A,AKT1,PDK3
GO Process	GO:0044237	Cellular metabolic process	74	6568	0.28	0.67	6.34e-09	9606.ENSP00000201586,9606.ENSP00000209929,9606.ENSP00000222002,9606.ENSP00000222982,9606.ENSP00000225831,9606.ENSP00000226444,9606.ENSP00000228872,9606.ENSP00000235835,9606.ENSP00000242057,9606.ENSP00000251566,9606.ENSP00000254090,9606.ENSP00000260010,9606.ENSP00000260128,9606.ENSP00000260682,9606.ENSP00000264162,9606.ENSP00000265403,9606.ENSP00000272452,9606.ENSP00000285238,9606.ENSP00000285979,…	SULT2B1,FMO2,SULT2A1,CYP3A5,CCL2,SULT1E1,CDKN1B,AKR7A2,AHR,UGT2A3,FMO5,TLR2,SULF1,CYP2C9,LCT,UGT2B10,SULT1C4,ABCC3,CYP2C18,NOD2,SLC22A11,GUSB,UGT1A6,UGT2B7,UGT1A1,UGT2B4,SULT1B1,SLC22A13,UGT8,SULT1C2,UGT2B17,SULT4A1,ABCC5,UGT2B28,CYP3A7,UGT2B15,CYP1A2,UGT1A10,UGT1A9,FMO1,SULF2,COMT,FMO4,ABCD3,CYP2C8,CYP2C19,SLC22A7,UGT1A4,UGT1A5,UGT1A7,UGT1A8,TLR4,SLC22A12,PDHA1,CYP1A1,SULT1A3,SULT1A1,SULT1A2,NFE…
GO Process	GO:0051552	Flavone metabolic process	6	6	2.23	2.28	8.43e-09	9606.ENSP00000264162,9606.ENSP00000304845,9606.ENSP00000343838,9606.ENSP00000346768,9606.ENSP00000362525,9606.ENSP00000362549	LCT,UGT1A1,UGT1A10,UGT1A9,UGT1A7,UGT1A8
GO Process	GO:0002933	Lipid hydroxylation	6	7	2.16	2.2	1.48e-08	9606.ENSP00000222982,9606.ENSP00000337450,9606.ENSP00000360317,9606.ENSP00000378488,9606.ENSP00000440689,9606.ENSP00000498939	CYP3A5,CYP3A7,CYP2C8,CYP1A1,CYP2E1,CYP3A4
GO Process	GO:0006811	Ion transport	29	1214	0.61	1.04	2.2e-08	9606.ENSP00000228872,9606.ENSP00000266088,9606.ENSP00000279178,9606.ENSP00000285238,9606.ENSP00000301891,9606.ENSP00000310241,9606.ENSP00000319991,9606.ENSP00000321735,9606.ENSP00000323568,9606.ENSP00000327569,9606.ENSP00000333926,9606.ENSP00000337335,9606.ENSP00000345708,9606.ENSP00000358794,9606.ENSP00000359233,9606.ENSP00000361666,9606.ENSP00000366797,9606.ENSP00000367102,9606.ENSP00000382342,…	CDKN1B,SLC5A1,SLC22A9,ABCC3,SLC22A11,SLC22A13,SLC16A6,SLC16A8,SLC2A2,SLC22A10,ABCC5,SLC22A8,KCNJ11,SLC16A4,ABCD3,SLC22A7,SLC22A12,SLC22A6,ABCC1,SLC16A5,SLC22A5,UGT1A3,SLC16A1,SLC16A7,SLC16A3,SLC16A2,ABCC4,ABCC2,ABCG2
GO Process	GO:0070989	Oxidative demethylation	7	19	1.8	2.04	2.88e-08	9606.ENSP00000222382,9606.ENSP00000222982,9606.ENSP00000260682,9606.ENSP00000337450,9606.ENSP00000342007,9606.ENSP00000360317,9606.ENSP00000498939	CYP3A43,CYP3A5,CYP2C9,CYP3A7,CYP1A2,CYP2C8,CYP3A4
GO Process	GO:1901616	Organic hydroxy compound catabolic process	10	80	1.33	1.8	2.97e-08	9606.ENSP00000222002,9606.ENSP00000226444,9606.ENSP00000264162,9606.ENSP00000272452,9606.ENSP00000308770,9606.ENSP00000354511,9606.ENSP00000378570,9606.ENSP00000378972,9606.ENSP00000378992,9606.ENSP00000498939	SULT2A1,SULT1E1,LCT,SULT1C4,SULT1B1,COMT,SULT1A3,SULT1A1,SULT1A2,CYP3A4
GO Process	GO:0019216	Regulation of lipid metabolic process	16	346	0.9	1.33	8.58e-08	9606.ENSP00000209929,9606.ENSP00000254090,9606.ENSP00000300589,9606.ENSP00000303174,9606.ENSP00000304845,9606.ENSP00000310241,9606.ENSP00000343838,9606.ENSP00000346768,9606.ENSP00000346901,9606.ENSP00000356723,9606.ENSP00000362508,9606.ENSP00000362525,9606.ENSP00000362549,9606.ENSP00000418532,9606.ENSP00000451828,9606.ENSP00000498864	FMO2,FMO5,NOD2,UGT1A6,UGT1A1,SLC22A13,UGT1A10,UGT1A9,FMO1,FMO4,UGT1A4,UGT1A7,UGT1A8,UGT1A3,AKT1,PDK3
GO Process	GO:0097267	Omega-hydroxylase P450 pathway	6	11	1.97	1.95	9.57e-08	9606.ENSP00000260682,9606.ENSP00000342007,9606.ENSP00000360317,9606.ENSP00000360372,9606.ENSP00000378488,9606.ENSP00000478561	CYP2C9,CYP1A2,CYP2C8,CYP2C19,CYP1A1,CYP1B1
GO Process	GO:0042440	Pigment metabolic process	9	65	1.37	1.72	1.08e-07	9606.ENSP00000264162,9606.ENSP00000304845,9606.ENSP00000343838,9606.ENSP00000346768,9606.ENSP00000362508,9606.ENSP00000362525,9606.ENSP00000362549,9606.ENSP00000382342,9606.ENSP00000497274	LCT,UGT1A1,UGT1A10,UGT1A9,UGT1A4,UGT1A7,UGT1A8,ABCC1,ABCC2
GO Process	GO:0008152	Metabolic process	80	7988	0.23	0.58	1.48e-07	9606.ENSP00000201586,9606.ENSP00000209929,9606.ENSP00000222002,9606.ENSP00000222382,9606.ENSP00000222982,9606.ENSP00000225831,9606.ENSP00000226444,9606.ENSP00000228872,9606.ENSP00000235835,9606.ENSP00000242057,9606.ENSP00000251566,9606.ENSP00000254090,9606.ENSP00000260010,9606.ENSP00000260128,9606.ENSP00000260682,9606.ENSP00000264162,9606.ENSP00000265403,9606.ENSP00000272452,9606.ENSP00000285238,…	SULT2B1,FMO2,SULT2A1,CYP3A43,CYP3A5,CCL2,SULT1E1,CDKN1B,AKR7A2,AHR,UGT2A3,FMO5,TLR2,SULF1,CYP2C9,LCT,UGT2B10,SULT1C4,ABCC3,CYP2C18,NOD2,SLC22A11,GUSB,UGT1A6,UGT2B7,UGT1A1,UGT2B4,SULT1B1,SLC22A13,UGT8,SULT1C2,UGT2B17,SLC2A2,SULT4A1,ABCC5,UGT2B28,CYP3A7,UGT2B15,CYP1A2,UGT1A10,KCNJ11,UGT1A9,FMO1,SULF2,COMT,FMO4,OVGP1,ABCD3,CYP2C8,CYP2C19,SLC22A7,UGT1A4,UGT1A5,UGT1A7,UGT1A8,TLR4,SLC22A12,PDHA1,CYP1A1…
GO Process	GO:0052696	Flavonoid glucuronidation	5	5	2.23	1.84	3.38e-07	9606.ENSP00000304845,9606.ENSP00000346768,9606.ENSP00000362525,9606.ENSP00000362549,9606.ENSP00000418532	UGT1A1,UGT1A9,UGT1A7,UGT1A8,UGT1A3
GO Process	GO:0001676	Long-chain fatty acid metabolic process	10	107	1.2	1.5	3.61e-07	9606.ENSP00000260682,9606.ENSP00000285979,9606.ENSP00000342007,9606.ENSP00000359233,9606.ENSP00000360317,9606.ENSP00000360372,9606.ENSP00000378488,9606.ENSP00000440689,9606.ENSP00000478561,9606.ENSP00000498939	CYP2C9,CYP2C18,CYP1A2,ABCD3,CYP2C8,CYP2C19,CYP1A1,CYP2E1,CYP1B1,CYP3A4
GO Process	GO:0120254	Olefinic compound metabolic process	11	144	1.11	1.44	3.81e-07	9606.ENSP00000222982,9606.ENSP00000260682,9606.ENSP00000285979,9606.ENSP00000337450,9606.ENSP00000342007,9606.ENSP00000360317,9606.ENSP00000360372,9606.ENSP00000378488,9606.ENSP00000440689,9606.ENSP00000478561,9606.ENSP00000498939	CYP3A5,CYP2C9,CYP2C18,CYP3A7,CYP1A2,CYP2C8,CYP2C19,CYP1A1,CYP2E1,CYP1B1,CYP3A4
GO Process	GO:0006109	Regulation of carbohydrate metabolic process	12	189	1.03	1.36	4.76e-07	9606.ENSP00000303174,9606.ENSP00000304845,9606.ENSP00000343838,9606.ENSP00000346768,9606.ENSP00000351407,9606.ENSP00000362508,9606.ENSP00000362525,9606.ENSP00000362549,9606.ENSP00000418532,9606.ENSP00000437955,9606.ENSP00000451828,9606.ENSP00000498864	UGT1A6,UGT1A1,UGT1A10,UGT1A9,ARNT,UGT1A4,UGT1A7,UGT1A8,UGT1A3,HIF1A,AKT1,PDK3
GO Process	GO:0006690	Icosanoid metabolic process	10	112	1.18	1.46	5.1e-07	9606.ENSP00000260010,9606.ENSP00000260682,9606.ENSP00000285979,9606.ENSP00000342007,9606.ENSP00000360317,9606.ENSP00000360372,9606.ENSP00000378488,9606.ENSP00000382342,9606.ENSP00000440689,9606.ENSP00000478561	TLR2,CYP2C9,CYP2C18,CYP1A2,CYP2C8,CYP2C19,CYP1A1,ABCC1,CYP2E1,CYP1B1
GO Process	GO:0016098	Monoterpenoid metabolic process	5	6	2.15	1.77	5.62e-07	9606.ENSP00000260682,9606.ENSP00000342007,9606.ENSP00000360372,9606.ENSP00000440689,9606.ENSP00000498939	CYP2C9,CYP1A2,CYP2C19,CYP2E1,CYP3A4
GO Process	GO:0042572	Retinol metabolic process	8	55	1.39	1.56	6.27e-07	9606.ENSP00000222982,9606.ENSP00000285979,9606.ENSP00000337450,9606.ENSP00000342007,9606.ENSP00000360317,9606.ENSP00000378488,9606.ENSP00000478561,9606.ENSP00000498939	CYP3A5,CYP2C18,CYP3A7,CYP1A2,CYP2C8,CYP1A1,CYP1B1,CYP3A4
GO Process	GO:0030277	Maintenance of gastrointestinal epithelium	6	20	1.71	1.59	1.4e-06	9606.ENSP00000300589,9606.ENSP00000363089,9606.ENSP00000406861,9606.ENSP00000417498,9606.ENSP00000485028,9606.ENSP00000494061	NOD2,TLR4,MUC6,MUC4,MUC13,MUC2
GO Process	GO:0042759	Long-chain fatty acid biosynthetic process	6	28	1.56	1.37	7.67e-06	9606.ENSP00000260682,9606.ENSP00000342007,9606.ENSP00000360317,9606.ENSP00000378488,9606.ENSP00000440689,9606.ENSP00000498939	CYP2C9,CYP1A2,CYP2C8,CYP1A1,CYP2E1,CYP3A4
GO Process	GO:0010675	Regulation of cellular carbohydrate metabolic process	10	158	1.03	1.13	1.01e-05	9606.ENSP00000303174,9606.ENSP00000304845,9606.ENSP00000343838,9606.ENSP00000346768,9606.ENSP00000362508,9606.ENSP00000362525,9606.ENSP00000362549,9606.ENSP00000418532,9606.ENSP00000451828,9606.ENSP00000498864	UGT1A6,UGT1A1,UGT1A10,UGT1A9,UGT1A4,UGT1A7,UGT1A8,UGT1A3,AKT1,PDK3
GO Process	GO:0033875	Ribonucleoside bisphosphate metabolic process	9	120	1.11	1.16	1.18e-05	9606.ENSP00000201586,9606.ENSP00000222002,9606.ENSP00000226444,9606.ENSP00000272452,9606.ENSP00000308770,9606.ENSP00000369134,9606.ENSP00000378570,9606.ENSP00000378972,9606.ENSP00000378992	SULT2B1,SULT2A1,SULT1E1,SULT1C4,SULT1B1,PDHA1,SULT1A3,SULT1A1,SULT1A2
GO Process	GO:0034032	Purine nucleoside bisphosphate metabolic process	9	120	1.11	1.16	1.18e-05	9606.ENSP00000201586,9606.ENSP00000222002,9606.ENSP00000226444,9606.ENSP00000272452,9606.ENSP00000308770,9606.ENSP00000369134,9606.ENSP00000378570,9606.ENSP00000378972,9606.ENSP00000378992	SULT2B1,SULT2A1,SULT1E1,SULT1C4,SULT1B1,PDHA1,SULT1A3,SULT1A1,SULT1A2
GO Process	GO:0071704	Organic substance metabolic process	73	7522	0.22	0.51	1.18e-05	9606.ENSP00000201586,9606.ENSP00000209929,9606.ENSP00000222002,9606.ENSP00000222982,9606.ENSP00000225831,9606.ENSP00000226444,9606.ENSP00000235835,9606.ENSP00000251566,9606.ENSP00000254090,9606.ENSP00000260010,9606.ENSP00000260128,9606.ENSP00000260682,9606.ENSP00000264162,9606.ENSP00000265403,9606.ENSP00000272452,9606.ENSP00000285979,9606.ENSP00000300589,9606.ENSP00000301891,9606.ENSP00000302728,…	SULT2B1,FMO2,SULT2A1,CYP3A5,CCL2,SULT1E1,AKR7A2,UGT2A3,FMO5,TLR2,SULF1,CYP2C9,LCT,UGT2B10,SULT1C4,CYP2C18,NOD2,SLC22A11,GUSB,UGT1A6,UGT2B7,UGT1A1,UGT2B4,SULT1B1,SLC22A13,UGT8,SULT1C2,UGT2B17,SLC2A2,SULT4A1,ABCC5,UGT2B28,CYP3A7,UGT2B15,CYP1A2,UGT1A10,KCNJ11,UGT1A9,FMO1,SULF2,COMT,OVGP1,ABCD3,CYP2C8,CYP2C19,UGT1A4,UGT1A5,UGT1A7,UGT1A8,TLR4,SLC22A12,PDHA1,CYP1A1,SULT1A3,SULT1A1,SULT1A2,NFE2L2,ABCC1,…
GO Process	GO:0018958	Phenol-containing compound metabolic process	8	88	1.19	1.18	1.57e-05	9606.ENSP00000222002,9606.ENSP00000308770,9606.ENSP00000354511,9606.ENSP00000378570,9606.ENSP00000378972,9606.ENSP00000378992,9606.ENSP00000440689,9606.ENSP00000465734	SULT2A1,SULT1B1,COMT,SULT1A3,SULT1A1,SULT1A2,CYP2E1,SLC16A2
GO Process	GO:1901360	Organic cyclic compound metabolic process	42	3181	0.35	0.6	2.42e-05	9606.ENSP00000201586,9606.ENSP00000222002,9606.ENSP00000222982,9606.ENSP00000226444,9606.ENSP00000235835,9606.ENSP00000260682,9606.ENSP00000265403,9606.ENSP00000272452,9606.ENSP00000304811,9606.ENSP00000304845,9606.ENSP00000305221,9606.ENSP00000308770,9606.ENSP00000310241,9606.ENSP00000320401,9606.ENSP00000332565,9606.ENSP00000334276,9606.ENSP00000337450,9606.ENSP00000341045,9606.ENSP00000342007,…	SULT2B1,SULT2A1,CYP3A5,SULT1E1,AKR7A2,CYP2C9,UGT2B10,SULT1C4,UGT2B7,UGT1A1,UGT2B4,SULT1B1,SLC22A13,UGT2B17,SULT4A1,UGT2B28,CYP3A7,UGT2B15,CYP1A2,COMT,ABCD3,CYP2C8,CYP2C19,UGT1A4,UGT1A7,UGT1A8,PDHA1,CYP1A1,SULT1A3,SULT1A1,SULT1A2,NFE2L2,ABCC1,UGT2B11,UGT1A3,CYP2E1,LDHA,SLC16A2,UGT2A2,CYP1B1,ABCC2,CYP3A4
GO Process	GO:1990962	Xenobiotic transport across blood-brain barrier	4	6	2.05	1.26	3.68e-05	9606.ENSP00000382342,9606.ENSP00000478255,9606.ENSP00000497274,9606.ENSP00000498246	ABCC1,ABCB1,ABCC2,ABCG2
GO Process	GO:0046222	Aflatoxin metabolic process	4	7	1.99	1.2	5.7e-05	9606.ENSP00000222982,9606.ENSP00000342007,9606.ENSP00000380252,9606.ENSP00000498939	CYP3A5,CYP1A2,NFE2L2,CYP3A4
GO Process	GO:0071716	Leukotriene transport	4	7	1.99	1.2	5.7e-05	9606.ENSP00000285238,9606.ENSP00000382342,9606.ENSP00000494609,9606.ENSP00000497274	ABCC3,ABCC1,ABCC4,ABCC2
GO Process	GO:0022600	Digestive system process	7	73	1.21	1.05	6.61e-05	9606.ENSP00000266088,9606.ENSP00000300589,9606.ENSP00000363089,9606.ENSP00000406861,9606.ENSP00000417498,9606.ENSP00000485028,9606.ENSP00000494061	SLC5A1,NOD2,TLR4,MUC6,MUC4,MUC13,MUC2
GO Process	GO:0015747	Urate transport	4	8	1.93	1.16	7.95e-05	9606.ENSP00000310241,9606.ENSP00000366797,9606.ENSP00000494609,9606.ENSP00000498246	SLC22A13,SLC22A12,ABCC4,ABCG2
GO Process	GO:0006631	Fatty acid metabolic process	12	325	0.8	0.84	0.0001	9606.ENSP00000260682,9606.ENSP00000285979,9606.ENSP00000342007,9606.ENSP00000359233,9606.ENSP00000360317,9606.ENSP00000360372,9606.ENSP00000362525,9606.ENSP00000362549,9606.ENSP00000378488,9606.ENSP00000440689,9606.ENSP00000478561,9606.ENSP00000498939	CYP2C9,CYP2C18,CYP1A2,ABCD3,CYP2C8,CYP2C19,UGT1A7,UGT1A8,CYP1A1,CYP2E1,CYP1B1,CYP3A4
GO Process	GO:0006778	Porphyrin-containing compound metabolic process	6	48	1.33	1.03	0.00011	9606.ENSP00000304845,9606.ENSP00000342007,9606.ENSP00000362508,9606.ENSP00000378488,9606.ENSP00000382342,9606.ENSP00000497274	UGT1A1,CYP1A2,UGT1A4,CYP1A1,ABCC1,ABCC2
GO Process	GO:0015850	Organic hydroxy compound transport	9	163	0.97	0.92	0.00011	9606.ENSP00000266088,9606.ENSP00000285238,9606.ENSP00000321735,9606.ENSP00000359233,9606.ENSP00000441065,9606.ENSP00000448071,9606.ENSP00000463978,9606.ENSP00000494609,9606.ENSP00000497274	SLC5A1,ABCC3,SLC16A8,ABCD3,SLC16A1,SLC16A7,SLC16A3,ABCC4,ABCC2
GO Process	GO:0051348	Negative regulation of transferase activity	11	274	0.83	0.84	0.00013	9606.ENSP00000228872,9606.ENSP00000303174,9606.ENSP00000304845,9606.ENSP00000343838,9606.ENSP00000346768,9606.ENSP00000362508,9606.ENSP00000362525,9606.ENSP00000362549,9606.ENSP00000418532,9606.ENSP00000419425,9606.ENSP00000451828	CDKN1B,UGT1A6,UGT1A1,UGT1A10,UGT1A9,UGT1A4,UGT1A7,UGT1A8,UGT1A3,PPIA,AKT1
GO Process	GO:0010575	Positive regulation of vascular endothelial growth factor production	5	29	1.47	0.99	0.00022	9606.ENSP00000260128,9606.ENSP00000351407,9606.ENSP00000353007,9606.ENSP00000437955,9606.ENSP00000478561	SULF1,ARNT,SULF2,HIF1A,CYP1B1
GO Process	GO:0070633	Transepithelial transport	5	29	1.47	0.99	0.00022	9606.ENSP00000266088,9606.ENSP00000382342,9606.ENSP00000478255,9606.ENSP00000497274,9606.ENSP00000498246	SLC5A1,ABCC1,ABCB1,ABCC2,ABCG2
GO Process	GO:0003008	System process	30	2029	0.4	0.56	0.00025	9606.ENSP00000225831,9606.ENSP00000228872,9606.ENSP00000260010,9606.ENSP00000260128,9606.ENSP00000266088,9606.ENSP00000285238,9606.ENSP00000300589,9606.ENSP00000333926,9606.ENSP00000337335,9606.ENSP00000345708,9606.ENSP00000353007,9606.ENSP00000363089,9606.ENSP00000366797,9606.ENSP00000367102,9606.ENSP00000382342,9606.ENSP00000402760,9606.ENSP00000406861,9606.ENSP00000417498,9606.ENSP00000437955,…	CCL2,CDKN1B,TLR2,SULF1,SLC5A1,ABCC3,NOD2,ABCC5,SLC22A8,KCNJ11,SULF2,TLR4,SLC22A12,SLC22A6,ABCC1,SLC22A5,MUC6,MUC4,HIF1A,SLC16A1,SLC16A7,AKT1,SLC16A2,UGT2A2,ABCB1,MUC13,MUC2,ABCC4,ABCC2,ABCG2
GO Process	GO:0140115	Export across plasma membrane	6	57	1.25	0.93	0.00025	9606.ENSP00000333926,9606.ENSP00000382342,9606.ENSP00000402760,9606.ENSP00000478255,9606.ENSP00000494609,9606.ENSP00000498246	ABCC5,ABCC1,SLC22A5,ABCB1,ABCC4,ABCG2
GO Process	GO:0009308	Amine metabolic process	7	93	1.11	0.89	0.00027	9606.ENSP00000308770,9606.ENSP00000319622,9606.ENSP00000354511,9606.ENSP00000378488,9606.ENSP00000378570,9606.ENSP00000378972,9606.ENSP00000378992	SULT1B1,SULT1C2,COMT,CYP1A1,SULT1A3,SULT1A1,SULT1A2
GO Process	GO:0044255	Cellular lipid metabolic process	19	918	0.55	0.64	0.00028	9606.ENSP00000222982,9606.ENSP00000260682,9606.ENSP00000264162,9606.ENSP00000285979,9606.ENSP00000304845,9606.ENSP00000311648,9606.ENSP00000337450,9606.ENSP00000342007,9606.ENSP00000346768,9606.ENSP00000359233,9606.ENSP00000360317,9606.ENSP00000360372,9606.ENSP00000362525,9606.ENSP00000362549,9606.ENSP00000378488,9606.ENSP00000418532,9606.ENSP00000440689,9606.ENSP00000478561,9606.ENSP00000498939	CYP3A5,CYP2C9,LCT,CYP2C18,UGT1A1,UGT8,CYP3A7,CYP1A2,UGT1A9,ABCD3,CYP2C8,CYP2C19,UGT1A7,UGT1A8,CYP1A1,UGT1A3,CYP2E1,CYP1B1,CYP3A4
GO Process	GO:0006787	Porphyrin-containing compound catabolic process	4	13	1.72	0.97	0.00033	9606.ENSP00000304845,9606.ENSP00000362508,9606.ENSP00000382342,9606.ENSP00000497274	UGT1A1,UGT1A4,ABCC1,ABCC2
GO Process	GO:0006855	Xenobiotic transmembrane transport	4	13	1.72	0.97	0.00033	9606.ENSP00000285238,9606.ENSP00000333926,9606.ENSP00000494609,9606.ENSP00000497274	ABCC3,ABCC5,ABCC4,ABCC2
GO Process	GO:0071702	Organic substance transport	29	1957	0.4	0.55	0.00034	9606.ENSP00000266088,9606.ENSP00000279178,9606.ENSP00000285238,9606.ENSP00000301891,9606.ENSP00000310241,9606.ENSP00000319991,9606.ENSP00000321735,9606.ENSP00000323568,9606.ENSP00000327569,9606.ENSP00000333926,9606.ENSP00000358794,9606.ENSP00000359233,9606.ENSP00000361666,9606.ENSP00000366797,9606.ENSP00000367102,9606.ENSP00000382342,9606.ENSP00000390564,9606.ENSP00000402760,9606.ENSP00000418532,…	SLC5A1,SLC22A9,ABCC3,SLC22A11,SLC22A13,SLC16A6,SLC16A8,SLC2A2,SLC22A10,ABCC5,SLC16A4,ABCD3,SLC22A7,SLC22A12,SLC22A6,ABCC1,SLC16A5,SLC22A5,UGT1A3,HIF1A,SLC16A1,SLC16A7,AKT1,SLC16A3,SLC16A2,ABCB1,ABCC4,ABCC2,ABCG2
GO Process	GO:0009056	Catabolic process	29	1976	0.4	0.54	0.00041	9606.ENSP00000222002,9606.ENSP00000222982,9606.ENSP00000226444,9606.ENSP00000260682,9606.ENSP00000264162,9606.ENSP00000272452,9606.ENSP00000300589,9606.ENSP00000302728,9606.ENSP00000304845,9606.ENSP00000308770,9606.ENSP00000342007,9606.ENSP00000354511,9606.ENSP00000356723,9606.ENSP00000358747,9606.ENSP00000359233,9606.ENSP00000360317,9606.ENSP00000360372,9606.ENSP00000362508,9606.ENSP00000378488,…	SULT2A1,CYP3A5,SULT1E1,CYP2C9,LCT,SULT1C4,NOD2,GUSB,UGT1A1,SULT1B1,CYP1A2,COMT,FMO4,OVGP1,ABCD3,CYP2C8,CYP2C19,UGT1A4,CYP1A1,SULT1A3,SULT1A1,SULT1A2,NFE2L2,ABCC1,LDHA,AKT1,CYP1B1,ABCC2,CYP3A4
GO Process	GO:0042359	Vitamin D metabolic process	4	14	1.69	0.94	0.00041	9606.ENSP00000362508,9606.ENSP00000378488,9606.ENSP00000418532,9606.ENSP00000498939	UGT1A4,CYP1A1,UGT1A3,CYP3A4
GO Process	GO:0046322	Negative regulation of fatty acid oxidation	4	15	1.66	0.92	0.00051	9606.ENSP00000209929,9606.ENSP00000346901,9606.ENSP00000356723,9606.ENSP00000451828	FMO2,FMO1,FMO4,AKT1
GO Process	GO:0051716	Cellular response to stimulus	61	6357	0.21	0.43	0.00064	9606.ENSP00000209929,9606.ENSP00000222002,9606.ENSP00000222982,9606.ENSP00000225831,9606.ENSP00000228872,9606.ENSP00000242057,9606.ENSP00000254090,9606.ENSP00000260010,9606.ENSP00000260128,9606.ENSP00000260682,9606.ENSP00000272452,9606.ENSP00000285238,9606.ENSP00000285979,9606.ENSP00000300589,9606.ENSP00000303174,9606.ENSP00000304845,9606.ENSP00000308770,9606.ENSP00000333926,9606.ENSP00000334276,…	FMO2,SULT2A1,CYP3A5,CCL2,CDKN1B,AHR,FMO5,TLR2,SULF1,CYP2C9,SULT1C4,ABCC3,CYP2C18,NOD2,UGT1A6,UGT1A1,SULT1B1,ABCC5,UGT2B28,CYP3A7,UGT2B15,CYP1A2,UGT1A10,UGT1A9,FMO1,ARNT,SULF2,COMT,FMO4,CYP2C8,CYP2C19,SLC22A7,UGT1A7,UGT1A8,TLR4,SLC22A12,CYP1A1,SULT1A3,SULT1A1,SULT1A2,NFE2L2,ABCC1,ITGA6,UGT2B11,MUC20,UGT1A3,PPIA,HIF1A,CYP2E1,SLC16A1,AKT1,CYP1B1,MUC1,MUC5AC,ABCC4,TLR5,ABCC2,ABCG2,MYD88,PDK3,CYP3A4
GO Process	GO:0031663	Lipopolysaccharide-mediated signaling pathway	5	39	1.34	0.84	0.0007	9606.ENSP00000225831,9606.ENSP00000260010,9606.ENSP00000363089,9606.ENSP00000451828,9606.ENSP00000498321	CCL2,TLR2,TLR4,AKT1,MYD88
GO Process	GO:0006790	Sulfur compound metabolic process	11	336	0.75	0.68	0.00075	9606.ENSP00000201586,9606.ENSP00000222002,9606.ENSP00000226444,9606.ENSP00000272452,9606.ENSP00000308770,9606.ENSP00000319622,9606.ENSP00000332565,9606.ENSP00000369134,9606.ENSP00000378570,9606.ENSP00000378972,9606.ENSP00000378992	SULT2B1,SULT2A1,SULT1E1,SULT1C4,SULT1B1,SULT1C2,SULT4A1,PDHA1,SULT1A3,SULT1A1,SULT1A2
GO Process	GO:0050896	Response to stimulus	70	7835	0.18	0.4	0.00079	9606.ENSP00000209929,9606.ENSP00000222002,9606.ENSP00000222982,9606.ENSP00000225831,9606.ENSP00000228872,9606.ENSP00000242057,9606.ENSP00000254090,9606.ENSP00000260010,9606.ENSP00000260128,9606.ENSP00000260682,9606.ENSP00000266088,9606.ENSP00000272452,9606.ENSP00000285238,9606.ENSP00000285979,9606.ENSP00000300589,9606.ENSP00000303174,9606.ENSP00000304845,9606.ENSP00000308770,9606.ENSP00000333926,…	FMO2,SULT2A1,CYP3A5,CCL2,CDKN1B,AHR,FMO5,TLR2,SULF1,CYP2C9,SLC5A1,SULT1C4,ABCC3,CYP2C18,NOD2,UGT1A6,UGT1A1,SULT1B1,ABCC5,UGT2B28,SLC22A8,CYP3A7,UGT2B15,CYP1A2,UGT1A10,KCNJ11,UGT1A9,FMO1,ARNT,SULF2,COMT,FMO4,ABCD3,CYP2C8,CYP2C19,SLC22A7,UGT1A7,UGT1A8,TLR4,SLC22A12,SLC22A6,CYP1A1,SULT1A3,SULT1A1,SULT1A2,NFE2L2,ABCC1,ITGA6,UGT2B11,SLC22A5,MUC7,MUC20,UGT1A3,PPIA,HIF1A,CYP2E1,SLC16A1,AKT1,UGT2A2,ABCB1…
GO Process	GO:1901135	Carbohydrate derivative metabolic process	19	998	0.51	0.57	0.00081	9606.ENSP00000201586,9606.ENSP00000222002,9606.ENSP00000226444,9606.ENSP00000235835,9606.ENSP00000260128,9606.ENSP00000264162,9606.ENSP00000272452,9606.ENSP00000302728,9606.ENSP00000308770,9606.ENSP00000311648,9606.ENSP00000333926,9606.ENSP00000353007,9606.ENSP00000358747,9606.ENSP00000369134,9606.ENSP00000378570,9606.ENSP00000378972,9606.ENSP00000378992,9606.ENSP00000437955,9606.ENSP00000445175	SULT2B1,SULT2A1,SULT1E1,AKR7A2,SULF1,LCT,SULT1C4,GUSB,SULT1B1,UGT8,ABCC5,SULF2,OVGP1,PDHA1,SULT1A3,SULT1A1,SULT1A2,HIF1A,LDHA
GO Process	GO:0051770	Positive regulation of nitric-oxide synthase biosynthetic process	4	18	1.58	0.84	0.00089	9606.ENSP00000225831,9606.ENSP00000260010,9606.ENSP00000300589,9606.ENSP00000363089	CCL2,TLR2,NOD2,TLR4
GO Process	GO:1902176	Negative regulation of oxidative stress-induced intrinsic apoptotic signaling pathway	4	18	1.58	0.84	0.00089	9606.ENSP00000380252,9606.ENSP00000419425,9606.ENSP00000437955,9606.ENSP00000451828	NFE2L2,PPIA,HIF1A,AKT1
GO Process	GO:0006633	Fatty acid biosynthetic process	7	119	1	0.73	0.0011	9606.ENSP00000260682,9606.ENSP00000342007,9606.ENSP00000359233,9606.ENSP00000360317,9606.ENSP00000378488,9606.ENSP00000440689,9606.ENSP00000498939	CYP2C9,CYP1A2,ABCD3,CYP2C8,CYP1A1,CYP2E1,CYP3A4
GO Process	GO:0009636	Response to toxic substance	9	229	0.82	0.67	0.0013	9606.ENSP00000242057,9606.ENSP00000260010,9606.ENSP00000337335,9606.ENSP00000378488,9606.ENSP00000380252,9606.ENSP00000402760,9606.ENSP00000478255,9606.ENSP00000478561,9606.ENSP00000498246	AHR,TLR2,SLC22A8,CYP1A1,NFE2L2,SLC22A5,ABCB1,CYP1B1,ABCG2
GO Process	GO:0002755	MyD88-dependent toll-like receptor signaling pathway	4	21	1.51	0.78	0.0015	9606.ENSP00000260010,9606.ENSP00000363089,9606.ENSP00000496355,9606.ENSP00000498321	TLR2,TLR4,TLR5,MYD88
GO Process	GO:1902652	Secondary alcohol metabolic process	7	129	0.96	0.68	0.0017	9606.ENSP00000201586,9606.ENSP00000222002,9606.ENSP00000260682,9606.ENSP00000342007,9606.ENSP00000362508,9606.ENSP00000418532,9606.ENSP00000498939	SULT2B1,SULT2A1,CYP2C9,CYP1A2,UGT1A4,UGT1A3,CYP3A4
GO Process	GO:0070640	Vitamin D3 metabolic process	3	6	1.93	0.78	0.0018	9606.ENSP00000362508,9606.ENSP00000418532,9606.ENSP00000498939	UGT1A4,UGT1A3,CYP3A4
GO Process	GO:0070995	NADPH oxidation	3	6	1.93	0.78	0.0018	9606.ENSP00000209929,9606.ENSP00000254090,9606.ENSP00000346901	FMO2,FMO5,FMO1
GO Process	GO:0001889	Liver development	7	131	0.96	0.67	0.0019	9606.ENSP00000303174,9606.ENSP00000304845,9606.ENSP00000343838,9606.ENSP00000346768,9606.ENSP00000362525,9606.ENSP00000362549,9606.ENSP00000378488	UGT1A6,UGT1A1,UGT1A10,UGT1A9,UGT1A7,UGT1A8,CYP1A1
GO Process	GO:1901361	Organic cyclic compound catabolic process	11	377	0.7	0.59	0.0019	9606.ENSP00000226444,9606.ENSP00000304845,9606.ENSP00000342007,9606.ENSP00000354511,9606.ENSP00000362508,9606.ENSP00000378488,9606.ENSP00000378570,9606.ENSP00000380252,9606.ENSP00000382342,9606.ENSP00000497274,9606.ENSP00000498939	SULT1E1,UGT1A1,CYP1A2,COMT,UGT1A4,CYP1A1,SULT1A3,NFE2L2,ABCC1,ABCC2,CYP3A4
GO Process	GO:0032496	Response to lipopolysaccharide	10	314	0.73	0.6	0.0022	9606.ENSP00000225831,9606.ENSP00000260010,9606.ENSP00000300589,9606.ENSP00000304845,9606.ENSP00000346901,9606.ENSP00000363089,9606.ENSP00000378488,9606.ENSP00000451828,9606.ENSP00000496355,9606.ENSP00000498321	CCL2,TLR2,NOD2,UGT1A1,FMO1,TLR4,CYP1A1,AKT1,TLR5,MYD88
GO Process	GO:1900017	Positive regulation of cytokine production involved in inflammatory response	4	24	1.45	0.73	0.0022	9606.ENSP00000300589,9606.ENSP00000363089,9606.ENSP00000437955,9606.ENSP00000498321	NOD2,TLR4,HIF1A,MYD88
GO Process	GO:0046209	Nitric oxide metabolic process	4	25	1.43	0.71	0.0025	9606.ENSP00000260010,9606.ENSP00000363089,9606.ENSP00000451828,9606.ENSP00000478561	TLR2,TLR4,AKT1,CYP1B1
GO Process	GO:0042886	Amide transport	7	142	0.92	0.62	0.0029	9606.ENSP00000333926,9606.ENSP00000382342,9606.ENSP00000437955,9606.ENSP00000465734,9606.ENSP00000478255,9606.ENSP00000494609,9606.ENSP00000498246	ABCC5,ABCC1,HIF1A,SLC16A2,ABCB1,ABCC4,ABCG2
GO Process	GO:0009804	Coumarin metabolic process	3	8	1.8	0.71	0.0032	9606.ENSP00000362525,9606.ENSP00000362549,9606.ENSP00000378488	UGT1A7,UGT1A8,CYP1A1
GO Process	GO:0009820	Alkaloid metabolic process	3	8	1.8	0.71	0.0032	9606.ENSP00000222982,9606.ENSP00000342007,9606.ENSP00000498939	CYP3A5,CYP1A2,CYP3A4
GO Process	GO:0097254	Renal tubular secretion	3	9	1.75	0.68	0.0041	9606.ENSP00000366797,9606.ENSP00000367102,9606.ENSP00000498246	SLC22A12,SLC22A6,ABCG2
GO Process	GO:0002224	Toll-like receptor signaling pathway	5	61	1.14	0.63	0.0042	9606.ENSP00000260010,9606.ENSP00000300589,9606.ENSP00000363089,9606.ENSP00000496355,9606.ENSP00000498321	TLR2,NOD2,TLR4,TLR5,MYD88
GO Process	GO:0048732	Gland development	11	419	0.65	0.52	0.0044	9606.ENSP00000228872,9606.ENSP00000303174,9606.ENSP00000304845,9606.ENSP00000343838,9606.ENSP00000346768,9606.ENSP00000362525,9606.ENSP00000362549,9606.ENSP00000378488,9606.ENSP00000437955,9606.ENSP00000451828,9606.ENSP00000478561	CDKN1B,UGT1A6,UGT1A1,UGT1A10,UGT1A9,UGT1A7,UGT1A8,CYP1A1,HIF1A,AKT1,CYP1B1
GO Process	GO:1901575	Organic substance catabolic process	24	1686	0.38	0.43	0.0044	9606.ENSP00000222002,9606.ENSP00000222982,9606.ENSP00000226444,9606.ENSP00000264162,9606.ENSP00000272452,9606.ENSP00000302728,9606.ENSP00000304845,9606.ENSP00000308770,9606.ENSP00000342007,9606.ENSP00000354511,9606.ENSP00000358747,9606.ENSP00000359233,9606.ENSP00000362508,9606.ENSP00000378488,9606.ENSP00000378570,9606.ENSP00000378972,9606.ENSP00000378992,9606.ENSP00000380252,9606.ENSP00000382342,…	SULT2A1,CYP3A5,SULT1E1,LCT,SULT1C4,GUSB,UGT1A1,SULT1B1,CYP1A2,COMT,OVGP1,ABCD3,UGT1A4,CYP1A1,SULT1A3,SULT1A1,SULT1A2,NFE2L2,ABCC1,LDHA,AKT1,CYP1B1,ABCC2,CYP3A4
GO Process	GO:0015721	Bile acid and bile salt transport	4	32	1.33	0.62	0.0054	9606.ENSP00000285238,9606.ENSP00000359233,9606.ENSP00000494609,9606.ENSP00000497274	ABCC3,ABCD3,ABCC4,ABCC2
GO Process	GO:0032757	Positive regulation of interleukin-8 production	5	65	1.12	0.6	0.0054	9606.ENSP00000260010,9606.ENSP00000300589,9606.ENSP00000363089,9606.ENSP00000496355,9606.ENSP00000498321	TLR2,NOD2,TLR4,TLR5,MYD88
GO Process	GO:0003014	Renal system process	6	111	0.96	0.56	0.0061	9606.ENSP00000260128,9606.ENSP00000266088,9606.ENSP00000353007,9606.ENSP00000366797,9606.ENSP00000367102,9606.ENSP00000498246	SULF1,SLC5A1,SULF2,SLC22A12,SLC22A6,ABCG2
GO Process	GO:0007249	I-kappaB kinase/NF-kappaB signaling	5	68	1.1	0.58	0.0063	9606.ENSP00000260010,9606.ENSP00000300589,9606.ENSP00000363089,9606.ENSP00000451828,9606.ENSP00000498321	TLR2,NOD2,TLR4,AKT1,MYD88
GO Process	GO:0042167	Heme catabolic process	3	11	1.67	0.62	0.0063	9606.ENSP00000362508,9606.ENSP00000382342,9606.ENSP00000497274	UGT1A4,ABCC1,ABCC2
GO Process	GO:0043619	Regulation of transcription from RNA polymerase II promoter in response to oxidative stress	3	11	1.67	0.62	0.0063	9606.ENSP00000351407,9606.ENSP00000380252,9606.ENSP00000437955	ARNT,NFE2L2,HIF1A
GO Process	GO:0140052	Cellular response to oxidised low-density lipoprotein particle stimulus	3	11	1.67	0.62	0.0063	9606.ENSP00000363089,9606.ENSP00000451828,9606.ENSP00000498321	TLR4,AKT1,MYD88
GO Process	GO:0044282	Small molecule catabolic process	10	369	0.66	0.49	0.0071	9606.ENSP00000222002,9606.ENSP00000226444,9606.ENSP00000272452,9606.ENSP00000308770,9606.ENSP00000359233,9606.ENSP00000378488,9606.ENSP00000378570,9606.ENSP00000378972,9606.ENSP00000378992,9606.ENSP00000498939	SULT2A1,SULT1E1,SULT1C4,SULT1B1,ABCD3,CYP1A1,SULT1A3,SULT1A1,SULT1A2,CYP3A4
GO Process	GO:0032722	Positive regulation of chemokine production	5	71	1.08	0.56	0.0075	9606.ENSP00000260010,9606.ENSP00000300589,9606.ENSP00000363089,9606.ENSP00000437955,9606.ENSP00000498321	TLR2,NOD2,TLR4,HIF1A,MYD88
GO Process	GO:0032490	Detection of molecule of bacterial origin	3	12	1.63	0.6	0.0076	9606.ENSP00000260010,9606.ENSP00000300589,9606.ENSP00000363089	TLR2,NOD2,TLR4
GO Process	GO:1903201	Regulation of oxidative stress-induced cell death	5	73	1.07	0.55	0.0083	9606.ENSP00000363089,9606.ENSP00000380252,9606.ENSP00000419425,9606.ENSP00000437955,9606.ENSP00000451828	TLR4,NFE2L2,PPIA,HIF1A,AKT1
GO Process	GO:0035461	Vitamin transmembrane transport	4	37	1.26	0.56	0.0084	9606.ENSP00000323568,9606.ENSP00000333926,9606.ENSP00000382342,9606.ENSP00000498246	SLC2A2,ABCC5,ABCC1,ABCG2
GO Process	GO:0046415	Urate metabolic process	3	13	1.59	0.58	0.009	9606.ENSP00000301891,9606.ENSP00000366797,9606.ENSP00000498246	SLC22A11,SLC22A12,ABCG2
GO Process	GO:0030258	Lipid modification	7	179	0.82	0.49	0.0097	9606.ENSP00000222982,9606.ENSP00000337450,9606.ENSP00000359233,9606.ENSP00000360317,9606.ENSP00000378488,9606.ENSP00000440689,9606.ENSP00000498939	CYP3A5,CYP3A7,ABCD3,CYP2C8,CYP1A1,CYP2E1,CYP3A4
GO Process	GO:0009150	Purine ribonucleotide metabolic process	10	390	0.64	0.45	0.0104	9606.ENSP00000201586,9606.ENSP00000222002,9606.ENSP00000226444,9606.ENSP00000272452,9606.ENSP00000308770,9606.ENSP00000369134,9606.ENSP00000378570,9606.ENSP00000378972,9606.ENSP00000378992,9606.ENSP00000445175	SULT2B1,SULT2A1,SULT1E1,SULT1C4,SULT1B1,PDHA1,SULT1A3,SULT1A1,SULT1A2,LDHA
GO Process	GO:0046618	Xenobiotic export from cell	3	14	1.56	0.56	0.0106	9606.ENSP00000402760,9606.ENSP00000478255,9606.ENSP00000497274	SLC22A5,ABCB1,ABCC2
GO Process	GO:0006576	Cellular biogenic amine metabolic process	5	84	1	0.48	0.0147	9606.ENSP00000308770,9606.ENSP00000354511,9606.ENSP00000378570,9606.ENSP00000378972,9606.ENSP00000378992	SULT1B1,COMT,SULT1A3,SULT1A1,SULT1A2
GO Process	GO:0006584	Catecholamine metabolic process	4	44	1.19	0.5	0.0147	9606.ENSP00000354511,9606.ENSP00000378570,9606.ENSP00000378972,9606.ENSP00000378992	COMT,SULT1A3,SULT1A1,SULT1A2
GO Process	GO:0009117	Nucleotide metabolic process	11	493	0.58	0.41	0.0147	9606.ENSP00000201586,9606.ENSP00000222002,9606.ENSP00000226444,9606.ENSP00000272452,9606.ENSP00000308770,9606.ENSP00000310241,9606.ENSP00000369134,9606.ENSP00000378570,9606.ENSP00000378972,9606.ENSP00000378992,9606.ENSP00000445175	SULT2B1,SULT2A1,SULT1E1,SULT1C4,SULT1B1,SLC22A13,PDHA1,SULT1A3,SULT1A1,SULT1A2,LDHA
GO Process	GO:0016125	Sterol metabolic process	6	135	0.88	0.46	0.0147	9606.ENSP00000201586,9606.ENSP00000222002,9606.ENSP00000260682,9606.ENSP00000342007,9606.ENSP00000478561,9606.ENSP00000498939	SULT2B1,SULT2A1,CYP2C9,CYP1A2,CYP1B1,CYP3A4
GO Process	GO:0071222	Cellular response to lipopolysaccharide	7	195	0.79	0.45	0.015	9606.ENSP00000225831,9606.ENSP00000260010,9606.ENSP00000300589,9606.ENSP00000363089,9606.ENSP00000451828,9606.ENSP00000496355,9606.ENSP00000498321	CCL2,TLR2,NOD2,TLR4,AKT1,TLR5,MYD88
GO Process	GO:0044248	Cellular catabolic process	22	1620	0.36	0.36	0.0154	9606.ENSP00000222002,9606.ENSP00000222982,9606.ENSP00000260682,9606.ENSP00000264162,9606.ENSP00000300589,9606.ENSP00000302728,9606.ENSP00000304845,9606.ENSP00000342007,9606.ENSP00000354511,9606.ENSP00000356723,9606.ENSP00000359233,9606.ENSP00000360317,9606.ENSP00000360372,9606.ENSP00000362508,9606.ENSP00000378488,9606.ENSP00000378570,9606.ENSP00000380252,9606.ENSP00000382342,9606.ENSP00000451828,…	SULT2A1,CYP3A5,CYP2C9,LCT,NOD2,GUSB,UGT1A1,CYP1A2,COMT,FMO4,ABCD3,CYP2C8,CYP2C19,UGT1A4,CYP1A1,SULT1A3,NFE2L2,ABCC1,AKT1,CYP1B1,ABCC2,CYP3A4
GO Process	GO:0006789	Bilirubin conjugation	2	2	2.23	0.52	0.0159	9606.ENSP00000304845,9606.ENSP00000362508	UGT1A1,UGT1A4
GO Process	GO:0014846	Esophagus smooth muscle contraction	2	2	2.23	0.52	0.0159	9606.ENSP00000260128,9606.ENSP00000353007	SULF1,SULF2
GO Process	GO:0070730	cAMP transport	2	2	2.23	0.52	0.0159	9606.ENSP00000333926,9606.ENSP00000494609	ABCC5,ABCC4
GO Process	GO:1903974	Positive regulation of cellular response to macrophage colony-stimulating factor stimulus	2	2	2.23	0.52	0.0159	9606.ENSP00000260010,9606.ENSP00000363089	TLR2,TLR4
GO Process	GO:0071396	Cellular response to lipid	11	502	0.57	0.4	0.0161	9606.ENSP00000225831,9606.ENSP00000242057,9606.ENSP00000260010,9606.ENSP00000300589,9606.ENSP00000304845,9606.ENSP00000363089,9606.ENSP00000451828,9606.ENSP00000478561,9606.ENSP00000496355,9606.ENSP00000498321,9606.ENSP00000498864	CCL2,AHR,TLR2,NOD2,UGT1A1,TLR4,AKT1,CYP1B1,TLR5,MYD88,PDK3
GO Process	GO:0009987	Cellular process	103	14826	0.07	0.27	0.0168	9606.ENSP00000201586,9606.ENSP00000209929,9606.ENSP00000222002,9606.ENSP00000222982,9606.ENSP00000225831,9606.ENSP00000226444,9606.ENSP00000228872,9606.ENSP00000235835,9606.ENSP00000242057,9606.ENSP00000251566,9606.ENSP00000254090,9606.ENSP00000260010,9606.ENSP00000260128,9606.ENSP00000260682,9606.ENSP00000264162,9606.ENSP00000265403,9606.ENSP00000266088,9606.ENSP00000272452,9606.ENSP00000279178,…	SULT2B1,FMO2,SULT2A1,CYP3A5,CCL2,SULT1E1,CDKN1B,AKR7A2,AHR,UGT2A3,FMO5,TLR2,SULF1,CYP2C9,LCT,UGT2B10,SLC5A1,SULT1C4,SLC22A9,ABCC3,CYP2C18,EMCN,NOD2,SLC22A11,MUC17,GUSB,UGT1A6,UGT2B7,UGT1A1,UGT2B4,SULT1B1,SLC22A13,UGT8,SULT1C2,SLC16A6,UGT2B17,SLC16A8,SLC2A2,SLC22A10,SULT4A1,ABCC5,UGT2B28,SLC22A8,CYP3A7,UGT2B15,CYP1A2,UGT1A10,KCNJ11,UGT1A9,FMO1,ARNT,SULF2,COMT,FMO4,SLC16A4,ABCD3,CYP2C8,CYP2C19,SLC2…
GO Process	GO:0043618	Regulation of transcription from RNA polymerase II promoter in response to stress	4	49	1.14	0.46	0.0193	9606.ENSP00000351407,9606.ENSP00000380252,9606.ENSP00000437955,9606.ENSP00000484824	ARNT,NFE2L2,HIF1A,MUC1
GO Process	GO:0044238	Primary metabolic process	61	7156	0.16	0.29	0.0194	9606.ENSP00000201586,9606.ENSP00000222002,9606.ENSP00000222982,9606.ENSP00000225831,9606.ENSP00000226444,9606.ENSP00000235835,9606.ENSP00000254090,9606.ENSP00000260010,9606.ENSP00000260128,9606.ENSP00000260682,9606.ENSP00000264162,9606.ENSP00000265403,9606.ENSP00000272452,9606.ENSP00000285979,9606.ENSP00000300589,9606.ENSP00000302728,9606.ENSP00000304811,9606.ENSP00000304845,9606.ENSP00000305221,…	SULT2B1,SULT2A1,CYP3A5,CCL2,SULT1E1,AKR7A2,FMO5,TLR2,SULF1,CYP2C9,LCT,UGT2B10,SULT1C4,CYP2C18,NOD2,GUSB,UGT2B7,UGT1A1,UGT2B4,SULT1B1,SLC22A13,UGT8,UGT2B17,SLC2A2,SULT4A1,UGT2B28,CYP3A7,UGT2B15,CYP1A2,UGT1A10,KCNJ11,UGT1A9,SULF2,COMT,OVGP1,ABCD3,CYP2C8,CYP2C19,UGT1A4,UGT1A7,UGT1A8,TLR4,PDHA1,CYP1A1,SULT1A3,SULT1A1,SULT1A2,NFE2L2,UGT2B11,UGT1A3,PPIA,HIF1A,CYP2E1,SLC16A1,LDHA,AKT1,SLC16A2,UGT2A2,CYP…
GO Process	GO:1901700	Response to oxygen-containing compound	21	1547	0.36	0.34	0.0202	9606.ENSP00000225831,9606.ENSP00000228872,9606.ENSP00000242057,9606.ENSP00000260010,9606.ENSP00000300589,9606.ENSP00000304845,9606.ENSP00000345708,9606.ENSP00000346901,9606.ENSP00000363089,9606.ENSP00000366797,9606.ENSP00000378488,9606.ENSP00000378570,9606.ENSP00000380252,9606.ENSP00000382342,9606.ENSP00000437955,9606.ENSP00000440689,9606.ENSP00000451828,9606.ENSP00000478561,9606.ENSP00000496355,…	CCL2,CDKN1B,AHR,TLR2,NOD2,UGT1A1,KCNJ11,FMO1,TLR4,SLC22A12,CYP1A1,SULT1A3,NFE2L2,ABCC1,HIF1A,CYP2E1,AKT1,CYP1B1,TLR5,MYD88,PDK3
GO Process	GO:0016137	Glycoside metabolic process	3	20	1.41	0.46	0.0229	9606.ENSP00000235835,9606.ENSP00000272452,9606.ENSP00000302728	AKR7A2,SULT1C4,GUSB
GO Process	GO:0098543	Detection of other organism	3	20	1.41	0.46	0.0229	9606.ENSP00000260010,9606.ENSP00000300589,9606.ENSP00000363089	TLR2,NOD2,TLR4
GO Process	GO:0009822	Alkaloid catabolic process	2	3	2.05	0.47	0.0238	9606.ENSP00000222982,9606.ENSP00000498939	CYP3A5,CYP3A4
GO Process	GO:0018894	Dibenzo-p-dioxin metabolic process	2	3	2.05	0.47	0.0238	9606.ENSP00000342007,9606.ENSP00000378488	CYP1A2,CYP1A1
GO Process	GO:0035879	Plasma membrane lactate transport	2	3	2.05	0.47	0.0238	9606.ENSP00000441065,9606.ENSP00000463978	SLC16A1,SLC16A3
GO Process	GO:0097744	Renal urate salt excretion	2	3	2.05	0.47	0.0238	9606.ENSP00000366797,9606.ENSP00000498246	SLC22A12,ABCG2
GO Process	GO:1904466	Positive regulation of matrix metallopeptidase secretion	2	3	2.05	0.47	0.0238	9606.ENSP00000260010,9606.ENSP00000363089	TLR2,TLR4
GO Process	GO:0006809	Nitric oxide biosynthetic process	3	21	1.38	0.45	0.0251	9606.ENSP00000363089,9606.ENSP00000451828,9606.ENSP00000478561	TLR4,AKT1,CYP1B1
GO Process	GO:0015833	Peptide transport	5	99	0.93	0.42	0.0251	9606.ENSP00000333926,9606.ENSP00000382342,9606.ENSP00000437955,9606.ENSP00000465734,9606.ENSP00000494609	ABCC5,ABCC1,HIF1A,SLC16A2,ABCC4
GO Process	GO:0042403	Thyroid hormone metabolic process	3	21	1.38	0.45	0.0251	9606.ENSP00000222002,9606.ENSP00000308770,9606.ENSP00000465734	SULT2A1,SULT1B1,SLC16A2
GO Process	GO:0036293	Response to decreased oxygen levels	8	291	0.67	0.38	0.026	9606.ENSP00000228872,9606.ENSP00000260010,9606.ENSP00000351407,9606.ENSP00000378488,9606.ENSP00000380252,9606.ENSP00000437955,9606.ENSP00000451828,9606.ENSP00000498864	CDKN1B,TLR2,ARNT,CYP1A1,NFE2L2,HIF1A,AKT1,PDK3
GO Process	GO:0006766	Vitamin metabolic process	5	101	0.92	0.41	0.0271	9606.ENSP00000362508,9606.ENSP00000378488,9606.ENSP00000382342,9606.ENSP00000418532,9606.ENSP00000498939	UGT1A4,CYP1A1,ABCC1,UGT1A3,CYP3A4
GO Process	GO:0033993	Response to lipid	14	827	0.46	0.34	0.0271	9606.ENSP00000225831,9606.ENSP00000228872,9606.ENSP00000242057,9606.ENSP00000260010,9606.ENSP00000300589,9606.ENSP00000304845,9606.ENSP00000346901,9606.ENSP00000363089,9606.ENSP00000378488,9606.ENSP00000451828,9606.ENSP00000478561,9606.ENSP00000496355,9606.ENSP00000498321,9606.ENSP00000498864	CCL2,CDKN1B,AHR,TLR2,NOD2,UGT1A1,FMO1,TLR4,CYP1A1,AKT1,CYP1B1,TLR5,MYD88,PDK3
GO Process	GO:2001243	Negative regulation of intrinsic apoptotic signaling pathway	5	101	0.92	0.41	0.0271	9606.ENSP00000380252,9606.ENSP00000419425,9606.ENSP00000437955,9606.ENSP00000451828,9606.ENSP00000484824	NFE2L2,PPIA,HIF1A,AKT1,MUC1
GO Process	GO:0048871	Multicellular organismal homeostasis	9	372	0.61	0.37	0.0272	9606.ENSP00000209929,9606.ENSP00000300589,9606.ENSP00000346901,9606.ENSP00000356723,9606.ENSP00000363089,9606.ENSP00000406861,9606.ENSP00000417498,9606.ENSP00000485028,9606.ENSP00000494061	FMO2,NOD2,FMO1,FMO4,TLR4,MUC6,MUC4,MUC13,MUC2
GO Process	GO:0034599	Cellular response to oxidative stress	7	224	0.72	0.38	0.0281	9606.ENSP00000351407,9606.ENSP00000380252,9606.ENSP00000382342,9606.ENSP00000419425,9606.ENSP00000437955,9606.ENSP00000451828,9606.ENSP00000478561	ARNT,NFE2L2,ABCC1,PPIA,HIF1A,AKT1,CYP1B1
GO Process	GO:0072348	Sulfur compound transport	4	57	1.08	0.41	0.0296	9606.ENSP00000333926,9606.ENSP00000382342,9606.ENSP00000494609,9606.ENSP00000498246	ABCC5,ABCC1,ABCC4,ABCG2
GO Process	GO:0097411	Hypoxia-inducible factor-1alpha signaling pathway	2	4	1.93	0.43	0.0329	9606.ENSP00000437955,9606.ENSP00000498864	HIF1A,PDK3
GO Process	GO:0099039	Sphingolipid translocation	2	4	1.93	0.43	0.0329	9606.ENSP00000382342,9606.ENSP00000478255	ABCC1,ABCB1
GO Process	GO:0005975	Carbohydrate metabolic process	10	470	0.56	0.34	0.0336	9606.ENSP00000235835,9606.ENSP00000264162,9606.ENSP00000302728,9606.ENSP00000323568,9606.ENSP00000345708,9606.ENSP00000358747,9606.ENSP00000369134,9606.ENSP00000445175,9606.ENSP00000451828,9606.ENSP00000498864	AKR7A2,LCT,GUSB,SLC2A2,KCNJ11,OVGP1,PDHA1,LDHA,AKT1,PDK3
GO Process	GO:0032094	Response to food	3	24	1.33	0.41	0.0336	9606.ENSP00000378488,9606.ENSP00000441065,9606.ENSP00000451828	CYP1A1,SLC16A1,AKT1
GO Process	GO:1901701	Cellular response to oxygen-containing compound	16	1057	0.41	0.32	0.0336	9606.ENSP00000225831,9606.ENSP00000242057,9606.ENSP00000260010,9606.ENSP00000300589,9606.ENSP00000304845,9606.ENSP00000363089,9606.ENSP00000366797,9606.ENSP00000378570,9606.ENSP00000380252,9606.ENSP00000382342,9606.ENSP00000437955,9606.ENSP00000451828,9606.ENSP00000478561,9606.ENSP00000496355,9606.ENSP00000498321,9606.ENSP00000498864	CCL2,AHR,TLR2,NOD2,UGT1A1,TLR4,SLC22A12,SULT1A3,NFE2L2,ABCC1,HIF1A,AKT1,CYP1B1,TLR5,MYD88,PDK3
GO Process	GO:0036003	Positive regulation of transcription from RNA polymerase II promoter in response to stress	3	25	1.31	0.4	0.0368	9606.ENSP00000380252,9606.ENSP00000437955,9606.ENSP00000484824	NFE2L2,HIF1A,MUC1
GO Process	GO:0060907	Positive regulation of macrophage cytokine production	3	25	1.31	0.4	0.0368	9606.ENSP00000300589,9606.ENSP00000363089,9606.ENSP00000498321	NOD2,TLR4,MYD88
GO Process	GO:0014070	Response to organic cyclic compound	14	861	0.44	0.32	0.0376	9606.ENSP00000225831,9606.ENSP00000228872,9606.ENSP00000242057,9606.ENSP00000260010,9606.ENSP00000300589,9606.ENSP00000304845,9606.ENSP00000345708,9606.ENSP00000359233,9606.ENSP00000367102,9606.ENSP00000378488,9606.ENSP00000378570,9606.ENSP00000441065,9606.ENSP00000478561,9606.ENSP00000498321	CCL2,CDKN1B,AHR,TLR2,NOD2,UGT1A1,KCNJ11,ABCD3,SLC22A6,CYP1A1,SULT1A3,SLC16A1,CYP1B1,MYD88
GO Process	GO:0009617	Response to bacterium	12	663	0.49	0.32	0.0377	9606.ENSP00000225831,9606.ENSP00000260010,9606.ENSP00000300589,9606.ENSP00000304845,9606.ENSP00000346901,9606.ENSP00000363089,9606.ENSP00000378488,9606.ENSP00000402760,9606.ENSP00000440689,9606.ENSP00000451828,9606.ENSP00000496355,9606.ENSP00000498321	CCL2,TLR2,NOD2,UGT1A1,FMO1,TLR4,CYP1A1,SLC22A5,CYP2E1,AKT1,TLR5,MYD88
GO Process	GO:0001819	Positive regulation of cytokine production	10	482	0.55	0.33	0.0396	9606.ENSP00000260010,9606.ENSP00000260128,9606.ENSP00000300589,9606.ENSP00000351407,9606.ENSP00000353007,9606.ENSP00000363089,9606.ENSP00000437955,9606.ENSP00000478561,9606.ENSP00000496355,9606.ENSP00000498321	TLR2,SULF1,NOD2,ARNT,SULF2,TLR4,HIF1A,CYP1B1,TLR5,MYD88
GO Process	GO:0006706	Steroid catabolic process	3	26	1.29	0.39	0.0398	9606.ENSP00000226444,9606.ENSP00000342007,9606.ENSP00000498939	SULT1E1,CYP1A2,CYP3A4
GO Process	GO:0061419	Positive regulation of transcription from RNA polymerase II promoter in response to hypoxia	2	5	1.83	0.39	0.0432	9606.ENSP00000380252,9606.ENSP00000437955	NFE2L2,HIF1A
GO Process	GO:1901656	Glycoside transport	2	5	1.83	0.39	0.0432	9606.ENSP00000266088,9606.ENSP00000285238	SLC5A1,ABCC3
GO Process	GO:0042537	Benzene-containing compound metabolic process	3	28	1.26	0.37	0.0476	9606.ENSP00000304845,9606.ENSP00000440689,9606.ENSP00000478561	UGT1A1,CYP2E1,CYP1B1
GO Process	GO:0008203	Cholesterol metabolic process	5	119	0.85	0.34	0.0494	9606.ENSP00000201586,9606.ENSP00000222002,9606.ENSP00000260682,9606.ENSP00000342007,9606.ENSP00000498939	SULT2B1,SULT2A1,CYP2C9,CYP1A2,CYP3A4
GO Function	GO:0015020	Glucuronosyltransferase activity	18	34	1.95	5.9	2.93e-24	9606.ENSP00000251566,9606.ENSP00000303174,9606.ENSP00000304811,9606.ENSP00000304845,9606.ENSP00000305221,9606.ENSP00000320401,9606.ENSP00000334276,9606.ENSP00000341045,9606.ENSP00000343838,9606.ENSP00000346768,9606.ENSP00000362508,9606.ENSP00000362513,9606.ENSP00000362525,9606.ENSP00000362549,9606.ENSP00000387683,9606.ENSP00000418532,9606.ENSP00000425497,9606.ENSP00000475028	UGT2A3,UGT1A6,UGT2B7,UGT1A1,UGT2B4,UGT2B17,UGT2B28,UGT2B15,UGT1A10,UGT1A9,UGT1A4,UGT1A5,UGT1A7,UGT1A8,UGT2B11,UGT1A3,UGT2A1,UGT2A2
GO Function	GO:0008194	UDP-glycosyltransferase activity	20	143	1.38	3.45	1.08e-17	9606.ENSP00000251566,9606.ENSP00000265403,9606.ENSP00000303174,9606.ENSP00000304811,9606.ENSP00000304845,9606.ENSP00000305221,9606.ENSP00000311648,9606.ENSP00000320401,9606.ENSP00000334276,9606.ENSP00000341045,9606.ENSP00000343838,9606.ENSP00000346768,9606.ENSP00000362508,9606.ENSP00000362513,9606.ENSP00000362525,9606.ENSP00000362549,9606.ENSP00000387683,9606.ENSP00000418532,9606.ENSP00000425497,…	UGT2A3,UGT2B10,UGT1A6,UGT2B7,UGT1A1,UGT2B4,UGT8,UGT2B17,UGT2B28,UGT2B15,UGT1A10,UGT1A9,UGT1A4,UGT1A5,UGT1A7,UGT1A8,UGT2B11,UGT1A3,UGT2A1,UGT2A2
GO Function	GO:0004497	Monooxygenase activity	17	103	1.45	3.33	6.27e-16	9606.ENSP00000209929,9606.ENSP00000222382,9606.ENSP00000222982,9606.ENSP00000254090,9606.ENSP00000260682,9606.ENSP00000285979,9606.ENSP00000337450,9606.ENSP00000342007,9606.ENSP00000346901,9606.ENSP00000356723,9606.ENSP00000356729,9606.ENSP00000360317,9606.ENSP00000360372,9606.ENSP00000378488,9606.ENSP00000440689,9606.ENSP00000478561,9606.ENSP00000498939	FMO2,CYP3A43,CYP3A5,FMO5,CYP2C9,CYP2C18,CYP3A7,CYP1A2,FMO1,FMO4,FMO3,CYP2C8,CYP2C19,CYP1A1,CYP2E1,CYP1B1,CYP3A4
GO Function	GO:0070330	Aromatase activity	12	24	1.93	3.91	1.24e-15	9606.ENSP00000222382,9606.ENSP00000222982,9606.ENSP00000260682,9606.ENSP00000285979,9606.ENSP00000337450,9606.ENSP00000342007,9606.ENSP00000360317,9606.ENSP00000360372,9606.ENSP00000378488,9606.ENSP00000440689,9606.ENSP00000478561,9606.ENSP00000498939	CYP3A43,CYP3A5,CYP2C9,CYP2C18,CYP3A7,CYP1A2,CYP2C8,CYP2C19,CYP1A1,CYP2E1,CYP1B1,CYP3A4
GO Function	GO:0016758	Hexosyltransferase activity	19	194	1.22	2.66	2.01e-14	9606.ENSP00000251566,9606.ENSP00000303174,9606.ENSP00000304811,9606.ENSP00000304845,9606.ENSP00000305221,9606.ENSP00000311648,9606.ENSP00000320401,9606.ENSP00000334276,9606.ENSP00000341045,9606.ENSP00000343838,9606.ENSP00000346768,9606.ENSP00000362508,9606.ENSP00000362513,9606.ENSP00000362525,9606.ENSP00000362549,9606.ENSP00000387683,9606.ENSP00000418532,9606.ENSP00000425497,9606.ENSP00000475028	UGT2A3,UGT1A6,UGT2B7,UGT1A1,UGT2B4,UGT8,UGT2B17,UGT2B28,UGT2B15,UGT1A10,UGT1A9,UGT1A4,UGT1A5,UGT1A7,UGT1A8,UGT2B11,UGT1A3,UGT2A1,UGT2A2
GO Function	GO:0008395	Steroid hydroxylase activity	12	36	1.75	3.4	4.34e-14	9606.ENSP00000222382,9606.ENSP00000222982,9606.ENSP00000260682,9606.ENSP00000285979,9606.ENSP00000337450,9606.ENSP00000342007,9606.ENSP00000360317,9606.ENSP00000360372,9606.ENSP00000378488,9606.ENSP00000440689,9606.ENSP00000478561,9606.ENSP00000498939	CYP3A43,CYP3A5,CYP2C9,CYP2C18,CYP3A7,CYP1A2,CYP2C8,CYP2C19,CYP1A1,CYP2E1,CYP1B1,CYP3A4
GO Function	GO:0022804	Active transmembrane transporter activity	24	421	0.99	2.11	6.42e-14	9606.ENSP00000266088,9606.ENSP00000279178,9606.ENSP00000285238,9606.ENSP00000301891,9606.ENSP00000319991,9606.ENSP00000321735,9606.ENSP00000333926,9606.ENSP00000337335,9606.ENSP00000345708,9606.ENSP00000358794,9606.ENSP00000359233,9606.ENSP00000361666,9606.ENSP00000367102,9606.ENSP00000382342,9606.ENSP00000390564,9606.ENSP00000402760,9606.ENSP00000441065,9606.ENSP00000448071,9606.ENSP00000463978,…	SLC5A1,SLC22A9,ABCC3,SLC22A11,SLC16A6,SLC16A8,ABCC5,SLC22A8,KCNJ11,SLC16A4,ABCD3,SLC22A7,SLC22A6,ABCC1,SLC16A5,SLC22A5,SLC16A1,SLC16A7,SLC16A3,SLC16A2,ABCB1,ABCC4,ABCC2,ABCG2
GO Function	GO:0008028	Monocarboxylic acid transmembrane transporter activity	13	60	1.57	3.07	1.68e-13	9606.ENSP00000279178,9606.ENSP00000285238,9606.ENSP00000310241,9606.ENSP00000319991,9606.ENSP00000321735,9606.ENSP00000358794,9606.ENSP00000390564,9606.ENSP00000441065,9606.ENSP00000448071,9606.ENSP00000463978,9606.ENSP00000465734,9606.ENSP00000494609,9606.ENSP00000498246	SLC22A9,ABCC3,SLC22A13,SLC16A6,SLC16A8,SLC16A4,SLC16A5,SLC16A1,SLC16A7,SLC16A3,SLC16A2,ABCC4,ABCG2
GO Function	GO:0016705	Oxidoreductase activity, acting on paired donors, with incorporation or reduction of molecular oxygen	17	177	1.21	2.44	6.75e-13	9606.ENSP00000209929,9606.ENSP00000222382,9606.ENSP00000222982,9606.ENSP00000254090,9606.ENSP00000260682,9606.ENSP00000285979,9606.ENSP00000337450,9606.ENSP00000342007,9606.ENSP00000346901,9606.ENSP00000356723,9606.ENSP00000356729,9606.ENSP00000360317,9606.ENSP00000360372,9606.ENSP00000378488,9606.ENSP00000440689,9606.ENSP00000478561,9606.ENSP00000498939	FMO2,CYP3A43,CYP3A5,FMO5,CYP2C9,CYP2C18,CYP3A7,CYP1A2,FMO1,FMO4,FMO3,CYP2C8,CYP2C19,CYP1A1,CYP2E1,CYP1B1,CYP3A4
GO Function	GO:0046943	Carboxylic acid transmembrane transporter activity	16	164	1.22	2.35	3.55e-12	9606.ENSP00000279178,9606.ENSP00000285238,9606.ENSP00000310241,9606.ENSP00000319991,9606.ENSP00000321735,9606.ENSP00000358794,9606.ENSP00000382342,9606.ENSP00000390564,9606.ENSP00000441065,9606.ENSP00000448071,9606.ENSP00000463978,9606.ENSP00000465734,9606.ENSP00000478255,9606.ENSP00000494609,9606.ENSP00000497274,9606.ENSP00000498246	SLC22A9,ABCC3,SLC22A13,SLC16A6,SLC16A8,SLC16A4,ABCC1,SLC16A5,SLC16A1,SLC16A7,SLC16A3,SLC16A2,ABCB1,ABCC4,ABCC2,ABCG2
GO Function	GO:0101020	Estrogen 16-alpha-hydroxylase activity	8	8	2.23	3.16	4.71e-12	9606.ENSP00000222382,9606.ENSP00000222982,9606.ENSP00000337450,9606.ENSP00000342007,9606.ENSP00000360317,9606.ENSP00000378488,9606.ENSP00000478561,9606.ENSP00000498939	CYP3A43,CYP3A5,CYP3A7,CYP1A2,CYP2C8,CYP1A1,CYP1B1,CYP3A4
GO Function	GO:0016709	Oxidoreductase activity, acting on paired donors, with incorporation or reduction of molecular oxygen, NAD(P)H as one donor, and incorporation of one atom of oxygen	10	40	1.63	2.56	8.84e-11	9606.ENSP00000209929,9606.ENSP00000254090,9606.ENSP00000260682,9606.ENSP00000346901,9606.ENSP00000356723,9606.ENSP00000356729,9606.ENSP00000360372,9606.ENSP00000378488,9606.ENSP00000440689,9606.ENSP00000498939	FMO2,FMO5,CYP2C9,FMO1,FMO4,FMO3,CYP2C19,CYP1A1,CYP2E1,CYP3A4
GO Function	GO:0008514	Organic anion transmembrane transporter activity	15	189	1.13	1.94	3.14e-10	9606.ENSP00000279178,9606.ENSP00000301891,9606.ENSP00000310241,9606.ENSP00000321735,9606.ENSP00000323568,9606.ENSP00000333926,9606.ENSP00000361666,9606.ENSP00000367102,9606.ENSP00000382342,9606.ENSP00000441065,9606.ENSP00000448071,9606.ENSP00000463978,9606.ENSP00000494609,9606.ENSP00000497274,9606.ENSP00000498246	SLC22A9,SLC22A11,SLC22A13,SLC16A8,SLC2A2,ABCC5,SLC22A7,SLC22A6,ABCC1,SLC16A1,SLC16A7,SLC16A3,ABCC4,ABCC2,ABCG2
GO Function	GO:0004062	Aryl sulfotransferase activity	7	9	2.12	2.56	6.23e-10	9606.ENSP00000226444,9606.ENSP00000272452,9606.ENSP00000308770,9606.ENSP00000319622,9606.ENSP00000378570,9606.ENSP00000378972,9606.ENSP00000378992	SULT1E1,SULT1C4,SULT1B1,SULT1C2,SULT1A3,SULT1A1,SULT1A2
GO Function	GO:0008146	Sulfotransferase activity	10	53	1.51	2.25	8.6e-10	9606.ENSP00000201586,9606.ENSP00000222002,9606.ENSP00000226444,9606.ENSP00000272452,9606.ENSP00000308770,9606.ENSP00000319622,9606.ENSP00000332565,9606.ENSP00000378570,9606.ENSP00000378972,9606.ENSP00000378992	SULT2B1,SULT2A1,SULT1E1,SULT1C4,SULT1B1,SULT1C2,SULT4A1,SULT1A3,SULT1A1,SULT1A2
GO Function	GO:0008509	Anion transmembrane transporter activity	17	319	0.96	1.58	3.07e-09	9606.ENSP00000279178,9606.ENSP00000285238,9606.ENSP00000301891,9606.ENSP00000310241,9606.ENSP00000321735,9606.ENSP00000323568,9606.ENSP00000333926,9606.ENSP00000337335,9606.ENSP00000361666,9606.ENSP00000367102,9606.ENSP00000382342,9606.ENSP00000441065,9606.ENSP00000448071,9606.ENSP00000463978,9606.ENSP00000494609,9606.ENSP00000497274,9606.ENSP00000498246	SLC22A9,ABCC3,SLC22A11,SLC22A13,SLC16A8,SLC2A2,ABCC5,SLC22A8,SLC22A7,SLC22A6,ABCC1,SLC16A1,SLC16A7,SLC16A3,ABCC4,ABCC2,ABCG2
GO Function	GO:0008559	ABC-type xenobiotic transporter activity	7	14	1.93	2.27	5.26e-09	9606.ENSP00000285238,9606.ENSP00000333926,9606.ENSP00000382342,9606.ENSP00000478255,9606.ENSP00000494609,9606.ENSP00000497274,9606.ENSP00000498246	ABCC3,ABCC5,ABCC1,ABCB1,ABCC4,ABCC2,ABCG2
GO Function	GO:0015291	Secondary active transmembrane transporter activity	15	249	1.01	1.59	9.24e-09	9606.ENSP00000266088,9606.ENSP00000279178,9606.ENSP00000301891,9606.ENSP00000319991,9606.ENSP00000321735,9606.ENSP00000337335,9606.ENSP00000358794,9606.ENSP00000361666,9606.ENSP00000367102,9606.ENSP00000390564,9606.ENSP00000402760,9606.ENSP00000441065,9606.ENSP00000448071,9606.ENSP00000463978,9606.ENSP00000465734	SLC5A1,SLC22A9,SLC22A11,SLC16A6,SLC16A8,SLC22A8,SLC16A4,SLC22A7,SLC22A6,SLC16A5,SLC22A5,SLC16A1,SLC16A7,SLC16A3,SLC16A2
GO Function	GO:0022857	Transmembrane transporter activity	28	1121	0.63	1.08	1.52e-08	9606.ENSP00000266088,9606.ENSP00000279178,9606.ENSP00000285238,9606.ENSP00000301891,9606.ENSP00000310241,9606.ENSP00000319991,9606.ENSP00000321735,9606.ENSP00000323568,9606.ENSP00000327569,9606.ENSP00000333926,9606.ENSP00000337335,9606.ENSP00000345708,9606.ENSP00000358794,9606.ENSP00000359233,9606.ENSP00000361666,9606.ENSP00000366797,9606.ENSP00000367102,9606.ENSP00000382342,9606.ENSP00000390564,…	SLC5A1,SLC22A9,ABCC3,SLC22A11,SLC22A13,SLC16A6,SLC16A8,SLC2A2,SLC22A10,ABCC5,SLC22A8,KCNJ11,SLC16A4,ABCD3,SLC22A7,SLC22A12,SLC22A6,ABCC1,SLC16A5,SLC22A5,SLC16A1,SLC16A7,SLC16A3,SLC16A2,ABCB1,ABCC4,ABCC2,ABCG2
GO Function	GO:0042910	Xenobiotic transmembrane transporter activity	8	32	1.63	2.04	1.52e-08	9606.ENSP00000285238,9606.ENSP00000333926,9606.ENSP00000382342,9606.ENSP00000402760,9606.ENSP00000478255,9606.ENSP00000494609,9606.ENSP00000497274,9606.ENSP00000498246	ABCC3,ABCC5,ABCC1,SLC22A5,ABCB1,ABCC4,ABCC2,ABCG2
GO Function	GO:0003824	Catalytic activity	66	5522	0.31	0.68	1.65e-08	9606.ENSP00000201586,9606.ENSP00000209929,9606.ENSP00000222002,9606.ENSP00000222382,9606.ENSP00000222982,9606.ENSP00000225831,9606.ENSP00000226444,9606.ENSP00000228872,9606.ENSP00000235835,9606.ENSP00000251566,9606.ENSP00000254090,9606.ENSP00000260010,9606.ENSP00000260128,9606.ENSP00000260682,9606.ENSP00000264162,9606.ENSP00000265403,9606.ENSP00000272452,9606.ENSP00000285979,9606.ENSP00000302728,…	SULT2B1,FMO2,SULT2A1,CYP3A43,CYP3A5,CCL2,SULT1E1,CDKN1B,AKR7A2,UGT2A3,FMO5,TLR2,SULF1,CYP2C9,LCT,UGT2B10,SULT1C4,CYP2C18,GUSB,UGT1A6,UGT2B7,UGT1A1,UGT2B4,SULT1B1,UGT8,SULT1C2,UGT2B17,SULT4A1,UGT2B28,CYP3A7,UGT2B15,CYP1A2,UGT1A10,UGT1A9,FMO1,SULF2,COMT,FMO4,FMO3,OVGP1,ABCD3,CYP2C8,CYP2C19,UGT1A4,UGT1A5,UGT1A7,UGT1A8,TLR4,PDHA1,CYP1A1,SULT1A3,SULT1A1,SULT1A2,ABCC1,UGT2B11,UGT1A3,PPIA,UGT2A1,CYP2E1,…
GO Function	GO:0020037	Heme binding	12	140	1.16	1.71	1.76e-08	9606.ENSP00000222382,9606.ENSP00000222982,9606.ENSP00000260682,9606.ENSP00000285979,9606.ENSP00000337450,9606.ENSP00000342007,9606.ENSP00000360317,9606.ENSP00000360372,9606.ENSP00000378488,9606.ENSP00000440689,9606.ENSP00000478561,9606.ENSP00000498939	CYP3A43,CYP3A5,CYP2C9,CYP2C18,CYP3A7,CYP1A2,CYP2C8,CYP2C19,CYP1A1,CYP2E1,CYP1B1,CYP3A4
GO Function	GO:0005506	Iron ion binding	12	155	1.12	1.59	4.9e-08	9606.ENSP00000222382,9606.ENSP00000222982,9606.ENSP00000260682,9606.ENSP00000285979,9606.ENSP00000337450,9606.ENSP00000342007,9606.ENSP00000360317,9606.ENSP00000360372,9606.ENSP00000378488,9606.ENSP00000440689,9606.ENSP00000478561,9606.ENSP00000498939	CYP3A43,CYP3A5,CYP2C9,CYP2C18,CYP3A7,CYP1A2,CYP2C8,CYP2C19,CYP1A1,CYP2E1,CYP1B1,CYP3A4
GO Function	GO:0004499	N,N-dimethylaniline monooxygenase activity	5	5	2.23	1.87	2.55e-07	9606.ENSP00000209929,9606.ENSP00000254090,9606.ENSP00000346901,9606.ENSP00000356723,9606.ENSP00000356729	FMO2,FMO5,FMO1,FMO4,FMO3
GO Function	GO:0140359	ABC-type transporter activity	8	50	1.43	1.67	2.58e-07	9606.ENSP00000285238,9606.ENSP00000333926,9606.ENSP00000359233,9606.ENSP00000382342,9606.ENSP00000478255,9606.ENSP00000494609,9606.ENSP00000497274,9606.ENSP00000498246	ABCC3,ABCC5,ABCD3,ABCC1,ABCB1,ABCC4,ABCC2,ABCG2
GO Function	GO:0016491	Oxidoreductase activity	21	731	0.69	1.04	3.66e-07	9606.ENSP00000209929,9606.ENSP00000222382,9606.ENSP00000222982,9606.ENSP00000235835,9606.ENSP00000254090,9606.ENSP00000260682,9606.ENSP00000285979,9606.ENSP00000337450,9606.ENSP00000342007,9606.ENSP00000346901,9606.ENSP00000356723,9606.ENSP00000356729,9606.ENSP00000360317,9606.ENSP00000360372,9606.ENSP00000369134,9606.ENSP00000378488,9606.ENSP00000440689,9606.ENSP00000445175,9606.ENSP00000478561,…	FMO2,CYP3A43,CYP3A5,AKR7A2,FMO5,CYP2C9,CYP2C18,CYP3A7,CYP1A2,FMO1,FMO4,FMO3,CYP2C8,CYP2C19,PDHA1,CYP1A1,CYP2E1,LDHA,CYP1B1,ABCC4,CYP3A4
GO Function	GO:0008391	Arachidonic acid monooxygenase activity	6	20	1.71	1.62	1.1e-06	9606.ENSP00000260682,9606.ENSP00000285979,9606.ENSP00000360317,9606.ENSP00000360372,9606.ENSP00000378488,9606.ENSP00000440689	CYP2C9,CYP2C18,CYP2C8,CYP2C19,CYP1A1,CYP2E1
GO Function	GO:0019825	Oxygen binding	7	38	1.5	1.55	1.1e-06	9606.ENSP00000222982,9606.ENSP00000285979,9606.ENSP00000337450,9606.ENSP00000360372,9606.ENSP00000378488,9606.ENSP00000440689,9606.ENSP00000498939	CYP3A5,CYP2C18,CYP3A7,CYP2C19,CYP1A1,CYP2E1,CYP3A4
GO Function	GO:0022853	Active ion transmembrane transporter activity	13	271	0.91	1.18	1.7e-06	9606.ENSP00000266088,9606.ENSP00000279178,9606.ENSP00000285238,9606.ENSP00000301891,9606.ENSP00000333926,9606.ENSP00000337335,9606.ENSP00000345708,9606.ENSP00000361666,9606.ENSP00000367102,9606.ENSP00000382342,9606.ENSP00000448071,9606.ENSP00000494609,9606.ENSP00000497274	SLC5A1,SLC22A9,ABCC3,SLC22A11,ABCC5,SLC22A8,KCNJ11,SLC22A7,SLC22A6,ABCC1,SLC16A7,ABCC4,ABCC2
GO Function	GO:0042626	ATPase-coupled transmembrane transporter activity	9	99	1.19	1.36	1.95e-06	9606.ENSP00000285238,9606.ENSP00000333926,9606.ENSP00000345708,9606.ENSP00000359233,9606.ENSP00000382342,9606.ENSP00000478255,9606.ENSP00000494609,9606.ENSP00000497274,9606.ENSP00000498246	ABCC3,ABCC5,KCNJ11,ABCD3,ABCC1,ABCB1,ABCC4,ABCC2,ABCG2
GO Function	GO:0008401	Retinoic acid 4-hydroxylase activity	5	10	1.93	1.57	2.41e-06	9606.ENSP00000222982,9606.ENSP00000285979,9606.ENSP00000337450,9606.ENSP00000360317,9606.ENSP00000498939	CYP3A5,CYP2C18,CYP3A7,CYP2C8,CYP3A4
GO Function	GO:0043225	ATPase-coupled inorganic anion transmembrane transporter activity	5	10	1.93	1.57	2.41e-06	9606.ENSP00000285238,9606.ENSP00000333926,9606.ENSP00000382342,9606.ENSP00000494609,9606.ENSP00000497274	ABCC3,ABCC5,ABCC1,ABCC4,ABCC2
GO Function	GO:0015293	Symporter activity	10	145	1.07	1.24	3.25e-06	9606.ENSP00000266088,9606.ENSP00000319991,9606.ENSP00000321735,9606.ENSP00000358794,9606.ENSP00000390564,9606.ENSP00000402760,9606.ENSP00000441065,9606.ENSP00000448071,9606.ENSP00000463978,9606.ENSP00000465734	SLC5A1,SLC16A6,SLC16A8,SLC16A4,SLC16A5,SLC22A5,SLC16A1,SLC16A7,SLC16A3,SLC16A2
GO Function	GO:1901618	Organic hydroxy compound transmembrane transporter activity	7	53	1.35	1.31	7.23e-06	9606.ENSP00000266088,9606.ENSP00000285238,9606.ENSP00000321735,9606.ENSP00000441065,9606.ENSP00000448071,9606.ENSP00000463978,9606.ENSP00000494609	SLC5A1,ABCC3,SLC16A8,SLC16A1,SLC16A7,SLC16A3,ABCC4
GO Function	GO:0016740	Transferase activity	35	2268	0.42	0.68	7.47e-06	9606.ENSP00000201586,9606.ENSP00000222002,9606.ENSP00000225831,9606.ENSP00000226444,9606.ENSP00000228872,9606.ENSP00000251566,9606.ENSP00000265403,9606.ENSP00000272452,9606.ENSP00000303174,9606.ENSP00000304811,9606.ENSP00000304845,9606.ENSP00000305221,9606.ENSP00000308770,9606.ENSP00000311648,9606.ENSP00000319622,9606.ENSP00000320401,9606.ENSP00000332565,9606.ENSP00000334276,9606.ENSP00000341045,…	SULT2B1,SULT2A1,CCL2,SULT1E1,CDKN1B,UGT2A3,UGT2B10,SULT1C4,UGT1A6,UGT2B7,UGT1A1,UGT2B4,SULT1B1,UGT8,SULT1C2,UGT2B17,SULT4A1,UGT2B28,UGT2B15,UGT1A10,UGT1A9,COMT,UGT1A4,UGT1A5,UGT1A7,UGT1A8,SULT1A3,SULT1A1,SULT1A2,UGT2B11,UGT1A3,UGT2A1,AKT1,UGT2A2,PDK3
GO Function	GO:0015562	Efflux transmembrane transporter activity	5	14	1.78	1.41	8.06e-06	9606.ENSP00000333926,9606.ENSP00000382342,9606.ENSP00000478255,9606.ENSP00000494609,9606.ENSP00000498246	ABCC5,ABCC1,ABCB1,ABCC4,ABCG2
GO Function	GO:0034875	Caffeine oxidase activity	4	4	2.23	1.44	8.79e-06	9606.ENSP00000260682,9606.ENSP00000342007,9606.ENSP00000360317,9606.ENSP00000498939	CYP2C9,CYP1A2,CYP2C8,CYP3A4
GO Function	GO:0050294	Steroid sulfotransferase activity	4	4	2.23	1.44	8.79e-06	9606.ENSP00000201586,9606.ENSP00000222002,9606.ENSP00000226444,9606.ENSP00000378972	SULT2B1,SULT2A1,SULT1E1,SULT1A1
GO Function	GO:0008392	Arachidonic acid epoxygenase activity	5	16	1.72	1.35	1.28e-05	9606.ENSP00000260682,9606.ENSP00000285979,9606.ENSP00000360317,9606.ENSP00000360372,9606.ENSP00000440689	CYP2C9,CYP2C18,CYP2C8,CYP2C19,CYP2E1
GO Function	GO:0101021	Estrogen 2-hydroxylase activity	4	5	2.13	1.38	1.44e-05	9606.ENSP00000337450,9606.ENSP00000342007,9606.ENSP00000378488,9606.ENSP00000498939	CYP3A7,CYP1A2,CYP1A1,CYP3A4
GO Function	GO:0015075	Ion transmembrane transporter activity	20	851	0.6	0.81	1.55e-05	9606.ENSP00000266088,9606.ENSP00000279178,9606.ENSP00000285238,9606.ENSP00000301891,9606.ENSP00000310241,9606.ENSP00000321735,9606.ENSP00000323568,9606.ENSP00000333926,9606.ENSP00000337335,9606.ENSP00000345708,9606.ENSP00000361666,9606.ENSP00000367102,9606.ENSP00000382342,9606.ENSP00000402760,9606.ENSP00000441065,9606.ENSP00000448071,9606.ENSP00000463978,9606.ENSP00000494609,9606.ENSP00000497274,…	SLC5A1,SLC22A9,ABCC3,SLC22A11,SLC22A13,SLC16A8,SLC2A2,ABCC5,SLC22A8,KCNJ11,SLC22A7,SLC22A6,ABCC1,SLC22A5,SLC16A1,SLC16A7,SLC16A3,ABCC4,ABCC2,ABCG2
GO Function	GO:0015129	Lactate transmembrane transporter activity	4	6	2.05	1.31	2.29e-05	9606.ENSP00000321735,9606.ENSP00000441065,9606.ENSP00000448071,9606.ENSP00000463978	SLC16A8,SLC16A1,SLC16A7,SLC16A3
GO Function	GO:0001972	Retinoic acid binding	5	20	1.63	1.23	3.01e-05	9606.ENSP00000304845,9606.ENSP00000346768,9606.ENSP00000362525,9606.ENSP00000362549,9606.ENSP00000418532	UGT1A1,UGT1A9,UGT1A7,UGT1A8,UGT1A3
GO Function	GO:0015431	ABC-type glutathione S-conjugate transporter activity	4	8	1.93	1.21	5.15e-05	9606.ENSP00000285238,9606.ENSP00000382342,9606.ENSP00000494609,9606.ENSP00000497274	ABCC3,ABCC1,ABCC4,ABCC2
GO Function	GO:1901682	Sulfur compound transmembrane transporter activity	6	56	1.26	0.99	0.00015	9606.ENSP00000285238,9606.ENSP00000333926,9606.ENSP00000382342,9606.ENSP00000494609,9606.ENSP00000497274,9606.ENSP00000498246	ABCC3,ABCC5,ABCC1,ABCC4,ABCC2,ABCG2
GO Function	GO:0046982	Protein heterodimerization activity	12	368	0.74	0.76	0.00021	9606.ENSP00000242057,9606.ENSP00000303174,9606.ENSP00000304845,9606.ENSP00000343838,9606.ENSP00000346768,9606.ENSP00000351407,9606.ENSP00000362508,9606.ENSP00000362525,9606.ENSP00000362549,9606.ENSP00000363089,9606.ENSP00000418532,9606.ENSP00000437955	AHR,UGT1A6,UGT1A1,UGT1A10,UGT1A9,ARNT,UGT1A4,UGT1A7,UGT1A8,TLR4,UGT1A3,HIF1A
GO Function	GO:0047894	Flavonol 3-sulfotransferase activity	3	3	2.23	0.99	0.00034	9606.ENSP00000226444,9606.ENSP00000378972,9606.ENSP00000378992	SULT1E1,SULT1A1,SULT1A2
GO Function	GO:0015103	Inorganic anion transmembrane transporter activity	8	155	0.94	0.79	0.00043	9606.ENSP00000285238,9606.ENSP00000301891,9606.ENSP00000333926,9606.ENSP00000337335,9606.ENSP00000367102,9606.ENSP00000382342,9606.ENSP00000494609,9606.ENSP00000497274	ABCC3,SLC22A11,ABCC5,SLC22A8,SLC22A6,ABCC1,ABCC4,ABCC2
GO Function	GO:0015347	Sodium-independent organic anion transmembrane transporter activity	4	16	1.63	0.93	0.00043	9606.ENSP00000279178,9606.ENSP00000301891,9606.ENSP00000361666,9606.ENSP00000367102	SLC22A9,SLC22A11,SLC22A7,SLC22A6
GO Function	GO:0036094	Small molecule binding	33	2507	0.35	0.51	0.00047	9606.ENSP00000201586,9606.ENSP00000209929,9606.ENSP00000222002,9606.ENSP00000222982,9606.ENSP00000254090,9606.ENSP00000285238,9606.ENSP00000285979,9606.ENSP00000300589,9606.ENSP00000304845,9606.ENSP00000333926,9606.ENSP00000337450,9606.ENSP00000345708,9606.ENSP00000346768,9606.ENSP00000346901,9606.ENSP00000356723,9606.ENSP00000356729,9606.ENSP00000359233,9606.ENSP00000360372,9606.ENSP00000362525,…	SULT2B1,FMO2,SULT2A1,CYP3A5,FMO5,ABCC3,CYP2C18,NOD2,UGT1A1,ABCC5,CYP3A7,KCNJ11,UGT1A9,FMO1,FMO4,FMO3,ABCD3,CYP2C19,UGT1A7,UGT1A8,CYP1A1,SULT1A1,ABCC1,SLC22A5,UGT1A3,CYP2E1,AKT1,ABCB1,ABCC4,ABCC2,ABCG2,PDK3,CYP3A4
GO Function	GO:0030197	Extracellular matrix constituent, lubricant activity	3	4	2.11	0.93	0.00054	9606.ENSP00000302716,9606.ENSP00000368771,9606.ENSP00000417498	MUC17,MUC3A,MUC4
GO Function	GO:0120319	Long-chain fatty acid omega-1 hydroxylase activity	3	4	2.11	0.93	0.00054	9606.ENSP00000360372,9606.ENSP00000378488,9606.ENSP00000440689	CYP2C19,CYP1A1,CYP2E1
GO Function	GO:0015143	Urate transmembrane transporter activity	3	5	2.01	0.88	0.00083	9606.ENSP00000366797,9606.ENSP00000494609,9606.ENSP00000498246	SLC22A12,ABCC4,ABCG2
GO Function	GO:0034634	Glutathione transmembrane transporter activity	3	5	2.01	0.88	0.00083	9606.ENSP00000333926,9606.ENSP00000382342,9606.ENSP00000494609	ABCC5,ABCC1,ABCC4
GO Function	GO:0051879	Hsp90 protein binding	5	45	1.28	0.81	0.00083	9606.ENSP00000242057,9606.ENSP00000300589,9606.ENSP00000378488,9606.ENSP00000437955,9606.ENSP00000440689	AHR,NOD2,CYP1A1,HIF1A,CYP2E1
GO Function	GO:0042803	Protein homodimerization activity	15	709	0.56	0.56	0.0015	9606.ENSP00000242057,9606.ENSP00000264162,9606.ENSP00000303174,9606.ENSP00000304845,9606.ENSP00000343838,9606.ENSP00000346768,9606.ENSP00000351407,9606.ENSP00000359233,9606.ENSP00000362508,9606.ENSP00000362525,9606.ENSP00000362549,9606.ENSP00000418532,9606.ENSP00000451828,9606.ENSP00000485028,9606.ENSP00000498246	AHR,LCT,UGT1A6,UGT1A1,UGT1A10,UGT1A9,ARNT,ABCD3,UGT1A4,UGT1A7,UGT1A8,UGT1A3,AKT1,MUC13,ABCG2
GO Function	GO:0050661	NADP binding	5	52	1.21	0.74	0.0015	9606.ENSP00000209929,9606.ENSP00000254090,9606.ENSP00000346901,9606.ENSP00000356723,9606.ENSP00000356729	FMO2,FMO5,FMO1,FMO4,FMO3
GO Function	GO:0072349	Modified amino acid transmembrane transporter activity	4	25	1.43	0.76	0.0016	9606.ENSP00000333926,9606.ENSP00000382342,9606.ENSP00000402760,9606.ENSP00000494609	ABCC5,ABCC1,SLC22A5,ABCC4
GO Function	GO:0106256	Hydroperoxy icosatetraenoate dehydratase activity	3	7	1.86	0.79	0.0016	9606.ENSP00000342007,9606.ENSP00000378488,9606.ENSP00000478561	CYP1A2,CYP1A1,CYP1B1
GO Function	GO:0034040	ATPase-coupled lipid transmembrane transporter activity	3	8	1.8	0.76	0.0021	9606.ENSP00000285238,9606.ENSP00000382342,9606.ENSP00000494609	ABCC3,ABCC1,ABCC4
GO Function	GO:0042887	Amide transmembrane transporter activity	4	36	1.28	0.61	0.0057	9606.ENSP00000333926,9606.ENSP00000382342,9606.ENSP00000494609,9606.ENSP00000498246	ABCC5,ABCC1,ABCC4,ABCG2
GO Function	GO:0031072	Heat shock protein binding	6	126	0.91	0.52	0.0082	9606.ENSP00000228872,9606.ENSP00000242057,9606.ENSP00000300589,9606.ENSP00000378488,9606.ENSP00000437955,9606.ENSP00000440689	CDKN1B,AHR,NOD2,CYP1A1,HIF1A,CYP2E1
GO Function	GO:0005452	Inorganic anion exchanger activity	3	15	1.53	0.57	0.0095	9606.ENSP00000301891,9606.ENSP00000337335,9606.ENSP00000367102	SLC22A11,SLC22A8,SLC22A6
GO Function	GO:0018675	(S)-limonene 6-monooxygenase activity	2	2	2.23	0.55	0.0125	9606.ENSP00000260682,9606.ENSP00000360372	CYP2C9,CYP2C19
GO Function	GO:0018676	(S)-limonene 7-monooxygenase activity	2	2	2.23	0.55	0.0125	9606.ENSP00000260682,9606.ENSP00000360372	CYP2C9,CYP2C19
GO Function	GO:0052741	(R)-limonene 6-monooxygenase activity	2	2	2.23	0.55	0.0125	9606.ENSP00000260682,9606.ENSP00000360372	CYP2C9,CYP2C19
GO Function	GO:0030544	Hsp70 protein binding	4	47	1.16	0.51	0.0132	9606.ENSP00000228872,9606.ENSP00000300589,9606.ENSP00000378488,9606.ENSP00000440689	CDKN1B,NOD2,CYP1A1,CYP2E1
GO Function	GO:0050660	Flavin adenine dinucleotide binding	5	89	0.98	0.49	0.0133	9606.ENSP00000209929,9606.ENSP00000254090,9606.ENSP00000346901,9606.ENSP00000356723,9606.ENSP00000356729	FMO2,FMO5,FMO1,FMO4,FMO3
GO Function	GO:0046983	Protein dimerization activity	17	1094	0.42	0.38	0.0144	9606.ENSP00000242057,9606.ENSP00000264162,9606.ENSP00000303174,9606.ENSP00000304845,9606.ENSP00000343838,9606.ENSP00000346768,9606.ENSP00000351407,9606.ENSP00000359233,9606.ENSP00000362508,9606.ENSP00000362525,9606.ENSP00000362549,9606.ENSP00000363089,9606.ENSP00000418532,9606.ENSP00000437955,9606.ENSP00000451828,9606.ENSP00000485028,9606.ENSP00000498246	AHR,LCT,UGT1A6,UGT1A1,UGT1A10,UGT1A9,ARNT,ABCD3,UGT1A4,UGT1A7,UGT1A8,TLR4,UGT1A3,HIF1A,AKT1,MUC13,ABCG2
GO Function	GO:0004027	Alcohol sulfotransferase activity	2	3	2.05	0.5	0.019	9606.ENSP00000201586,9606.ENSP00000222002	SULT2B1,SULT2A1
GO Function	GO:0070576	Vitamin D 24-hydroxylase activity	2	3	2.05	0.5	0.019	9606.ENSP00000378488,9606.ENSP00000498939	CYP1A1,CYP3A4
GO Function	GO:0071714	Icosanoid transmembrane transporter activity	2	3	2.05	0.5	0.019	9606.ENSP00000285238,9606.ENSP00000494609	ABCC3,ABCC4
GO Function	GO:0005496	Steroid binding	5	101	0.92	0.43	0.0219	9606.ENSP00000201586,9606.ENSP00000226444,9606.ENSP00000304845,9606.ENSP00000362549,9606.ENSP00000498939	SULT2B1,SULT1E1,UGT1A1,UGT1A8,CYP3A4
GO Function	GO:0015301	Anion:anion antiporter activity	4	56	1.08	0.44	0.0229	9606.ENSP00000279178,9606.ENSP00000337335,9606.ENSP00000361666,9606.ENSP00000367102	SLC22A9,SLC22A8,SLC22A7,SLC22A6
GO Function	GO:0005319	Lipid transporter activity	6	163	0.8	0.4	0.0256	9606.ENSP00000279178,9606.ENSP00000285238,9606.ENSP00000359233,9606.ENSP00000382342,9606.ENSP00000478255,9606.ENSP00000494609	SLC22A9,ABCC3,ABCD3,ABCC1,ABCB1,ABCC4
GO Function	GO:0005354	Galactose transmembrane transporter activity	2	4	1.93	0.45	0.0263	9606.ENSP00000266088,9606.ENSP00000323568	SLC5A1,SLC2A2
GO Function	GO:0008449	N-acetylglucosamine-6-sulfatase activity	2	4	1.93	0.45	0.0263	9606.ENSP00000260128,9606.ENSP00000353007	SULF1,SULF2
GO Function	GO:0015432	ABC-type bile acid transporter activity	2	4	1.93	0.45	0.0263	9606.ENSP00000285238,9606.ENSP00000494609	ABCC3,ABCC4
GO Function	GO:0001875	Lipopolysaccharide immune receptor activity	2	5	1.83	0.42	0.0343	9606.ENSP00000260010,9606.ENSP00000363089	TLR2,TLR4
GO Function	GO:0043168	Anion binding	27	2404	0.28	0.29	0.0343	9606.ENSP00000209929,9606.ENSP00000222002,9606.ENSP00000254090,9606.ENSP00000285238,9606.ENSP00000300589,9606.ENSP00000304845,9606.ENSP00000333926,9606.ENSP00000345708,9606.ENSP00000346768,9606.ENSP00000346901,9606.ENSP00000356723,9606.ENSP00000356729,9606.ENSP00000359233,9606.ENSP00000362525,9606.ENSP00000362549,9606.ENSP00000367102,9606.ENSP00000378570,9606.ENSP00000378972,9606.ENSP00000382342,…	FMO2,SULT2A1,FMO5,ABCC3,NOD2,UGT1A1,ABCC5,KCNJ11,UGT1A9,FMO1,FMO4,FMO3,ABCD3,UGT1A7,UGT1A8,SLC22A6,SULT1A3,SULT1A1,ABCC1,SLC22A5,UGT1A3,AKT1,ABCB1,ABCC4,ABCC2,ABCG2,PDK3
GO Function	GO:0038187	Pattern recognition receptor activity	3	28	1.26	0.39	0.0377	9606.ENSP00000260010,9606.ENSP00000300589,9606.ENSP00000363089	TLR2,NOD2,TLR4
GO Component	GO:0005796	Golgi lumen	17	106	1.44	3.26	1.21e-15	9606.ENSP00000302716,9606.ENSP00000333926,9606.ENSP00000365473,9606.ENSP00000368771,9606.ENSP00000381008,9606.ENSP00000406861,9606.ENSP00000407422,9606.ENSP00000414350,9606.ENSP00000417498,9606.ENSP00000431983,9606.ENSP00000436812,9606.ENSP00000441929,9606.ENSP00000484824,9606.ENSP00000485028,9606.ENSP00000485659,9606.ENSP00000494061,9606.ENSP00000495398	MUC17,ABCC5,MUC21,MUC3A,MUC16,MUC6,MUC7,MUC20,MUC4,MUC15,MUC5B,MUC12,MUC1,MUC13,MUC5AC,MUC2,MUC19
GO Component	GO:0012505	Endomembrane system	70	4721	0.4	0.92	8.37e-14	9606.ENSP00000201586,9606.ENSP00000209929,9606.ENSP00000222382,9606.ENSP00000222982,9606.ENSP00000226444,9606.ENSP00000228872,9606.ENSP00000235835,9606.ENSP00000254090,9606.ENSP00000260010,9606.ENSP00000260128,9606.ENSP00000260682,9606.ENSP00000265403,9606.ENSP00000266088,9606.ENSP00000285979,9606.ENSP00000300589,9606.ENSP00000302716,9606.ENSP00000302728,9606.ENSP00000303174,9606.ENSP00000304811,…	SULT2B1,FMO2,CYP3A43,CYP3A5,SULT1E1,CDKN1B,AKR7A2,FMO5,TLR2,SULF1,CYP2C9,UGT2B10,SLC5A1,CYP2C18,NOD2,MUC17,GUSB,UGT1A6,UGT2B7,UGT1A1,UGT2B4,SLC22A13,UGT8,UGT2B17,ABCC5,UGT2B28,CYP3A7,UGT2B15,CYP1A2,UGT1A10,UGT1A9,FMO1,SULF2,FMO4,FMO3,OVGP1,CYP2C8,CYP2C19,UGT1A4,UGT1A5,UGT1A7,UGT1A8,TLR4,MUC21,MUC3A,CYP1A1,NFE2L2,MUC16,UGT2B11,MUC6,MUC7,MUC20,MUC4,UGT1A3,PPIA,MUC15,MUC5B,CYP2E1,MUC12,SLC16A3,UGT2A…
GO Component	GO:0016020	Membrane	99	9523	0.25	0.7	8.37e-14	9606.ENSP00000209929,9606.ENSP00000222382,9606.ENSP00000222982,9606.ENSP00000226444,9606.ENSP00000251566,9606.ENSP00000254090,9606.ENSP00000260010,9606.ENSP00000260128,9606.ENSP00000260682,9606.ENSP00000264162,9606.ENSP00000265403,9606.ENSP00000266088,9606.ENSP00000279178,9606.ENSP00000285238,9606.ENSP00000285979,9606.ENSP00000296420,9606.ENSP00000300589,9606.ENSP00000301891,9606.ENSP00000302716,…	FMO2,CYP3A43,CYP3A5,SULT1E1,UGT2A3,FMO5,TLR2,SULF1,CYP2C9,LCT,UGT2B10,SLC5A1,SLC22A9,ABCC3,CYP2C18,EMCN,NOD2,SLC22A11,MUC17,GUSB,UGT1A6,UGT2B7,UGT1A1,UGT2B4,SLC22A13,UGT8,SLC16A6,UGT2B17,SLC16A8,SLC2A2,SLC22A10,ABCC5,UGT2B28,SLC22A8,CYP3A7,UGT2B15,CYP1A2,UGT1A10,KCNJ11,UGT1A9,FMO1,SULF2,COMT,FMO4,FMO3,SLC16A4,ABCD3,CYP2C8,CYP2C19,SLC22A7,UGT1A4,UGT1A5,UGT1A7,UGT1A8,TLR4,MUC21,SLC22A12,SLC22A6,MUC…
GO Component	GO:0031224	Intrinsic component of membrane	78	5828	0.36	0.85	8.37e-14	9606.ENSP00000209929,9606.ENSP00000222382,9606.ENSP00000222982,9606.ENSP00000251566,9606.ENSP00000254090,9606.ENSP00000260010,9606.ENSP00000264162,9606.ENSP00000265403,9606.ENSP00000266088,9606.ENSP00000279178,9606.ENSP00000285238,9606.ENSP00000296420,9606.ENSP00000300589,9606.ENSP00000301891,9606.ENSP00000302716,9606.ENSP00000303174,9606.ENSP00000304811,9606.ENSP00000304845,9606.ENSP00000305221,…	FMO2,CYP3A43,CYP3A5,UGT2A3,FMO5,TLR2,LCT,UGT2B10,SLC5A1,SLC22A9,ABCC3,EMCN,NOD2,SLC22A11,MUC17,UGT1A6,UGT2B7,UGT1A1,UGT2B4,SLC22A13,UGT8,SLC16A6,UGT2B17,SLC16A8,SLC2A2,SLC22A10,ABCC5,UGT2B28,SLC22A8,CYP3A7,UGT2B15,UGT1A10,KCNJ11,UGT1A9,FMO1,COMT,FMO4,FMO3,SLC16A4,ABCD3,SLC22A7,UGT1A4,UGT1A5,UGT1A7,UGT1A8,TLR4,MUC21,SLC22A12,SLC22A6,MUC3A,SULT1A1,MUC16,ABCC1,ITGA6,UGT2B11,SLC16A5,SLC22A5,MUC4,UGT1…
GO Component	GO:0016021	Integral component of membrane	76	5670	0.36	0.85	1.43e-13	9606.ENSP00000209929,9606.ENSP00000222382,9606.ENSP00000222982,9606.ENSP00000251566,9606.ENSP00000254090,9606.ENSP00000260010,9606.ENSP00000264162,9606.ENSP00000265403,9606.ENSP00000266088,9606.ENSP00000279178,9606.ENSP00000285238,9606.ENSP00000296420,9606.ENSP00000301891,9606.ENSP00000302716,9606.ENSP00000303174,9606.ENSP00000304811,9606.ENSP00000304845,9606.ENSP00000305221,9606.ENSP00000310241,…	FMO2,CYP3A43,CYP3A5,UGT2A3,FMO5,TLR2,LCT,UGT2B10,SLC5A1,SLC22A9,ABCC3,EMCN,SLC22A11,MUC17,UGT1A6,UGT2B7,UGT1A1,UGT2B4,SLC22A13,UGT8,SLC16A6,UGT2B17,SLC16A8,SLC2A2,SLC22A10,ABCC5,UGT2B28,SLC22A8,CYP3A7,UGT2B15,UGT1A10,KCNJ11,UGT1A9,FMO1,COMT,FMO4,FMO3,SLC16A4,ABCD3,SLC22A7,UGT1A4,UGT1A5,UGT1A7,UGT1A8,TLR4,MUC21,SLC22A12,SLC22A6,MUC3A,SULT1A1,MUC16,ABCC1,ITGA6,UGT2B11,SLC16A5,SLC22A5,MUC4,UGT1A3,UG…
GO Component	GO:0016324	Apical plasma membrane	22	367	1.01	2.1	2.71e-13	9606.ENSP00000264162,9606.ENSP00000266088,9606.ENSP00000301891,9606.ENSP00000302716,9606.ENSP00000310241,9606.ENSP00000321735,9606.ENSP00000323568,9606.ENSP00000333926,9606.ENSP00000337335,9606.ENSP00000366797,9606.ENSP00000382342,9606.ENSP00000402760,9606.ENSP00000414350,9606.ENSP00000441065,9606.ENSP00000463978,9606.ENSP00000465734,9606.ENSP00000478255,9606.ENSP00000484824,9606.ENSP00000485028,…	LCT,SLC5A1,SLC22A11,MUC17,SLC22A13,SLC16A8,SLC2A2,ABCC5,SLC22A8,SLC22A12,ABCC1,SLC22A5,MUC20,SLC16A1,SLC16A3,SLC16A2,ABCB1,MUC1,MUC13,ABCC4,ABCC2,ABCG2
GO Component	GO:0005789	Endoplasmic reticulum membrane	34	1157	0.7	1.42	1.14e-12	9606.ENSP00000209929,9606.ENSP00000222382,9606.ENSP00000222982,9606.ENSP00000254090,9606.ENSP00000260682,9606.ENSP00000265403,9606.ENSP00000285979,9606.ENSP00000303174,9606.ENSP00000304811,9606.ENSP00000304845,9606.ENSP00000305221,9606.ENSP00000320401,9606.ENSP00000334276,9606.ENSP00000337450,9606.ENSP00000341045,9606.ENSP00000342007,9606.ENSP00000343838,9606.ENSP00000346768,9606.ENSP00000346901,…	FMO2,CYP3A43,CYP3A5,FMO5,CYP2C9,UGT2B10,CYP2C18,UGT1A6,UGT2B7,UGT1A1,UGT2B4,UGT2B17,UGT2B28,CYP3A7,UGT2B15,CYP1A2,UGT1A10,UGT1A9,FMO1,FMO4,FMO3,CYP2C8,CYP2C19,UGT1A4,UGT1A5,UGT1A7,UGT1A8,CYP1A1,UGT2B11,UGT1A3,CYP2E1,UGT2A2,CYP1B1,CYP3A4
GO Component	GO:0031984	Organelle subcompartment	36	1479	0.62	1.21	2.44e-11	9606.ENSP00000209929,9606.ENSP00000222382,9606.ENSP00000222982,9606.ENSP00000254090,9606.ENSP00000260128,9606.ENSP00000260682,9606.ENSP00000265403,9606.ENSP00000285979,9606.ENSP00000303174,9606.ENSP00000304811,9606.ENSP00000304845,9606.ENSP00000305221,9606.ENSP00000320401,9606.ENSP00000334276,9606.ENSP00000337450,9606.ENSP00000341045,9606.ENSP00000342007,9606.ENSP00000343838,9606.ENSP00000346768,…	FMO2,CYP3A43,CYP3A5,FMO5,SULF1,CYP2C9,UGT2B10,CYP2C18,UGT1A6,UGT2B7,UGT1A1,UGT2B4,UGT2B17,UGT2B28,CYP3A7,UGT2B15,CYP1A2,UGT1A10,UGT1A9,FMO1,SULF2,FMO4,FMO3,CYP2C8,CYP2C19,UGT1A4,UGT1A5,UGT1A7,UGT1A8,CYP1A1,UGT2B11,UGT1A3,CYP2E1,UGT2A2,CYP1B1,CYP3A4
GO Component	GO:0005783	Endoplasmic reticulum	39	2021	0.52	0.97	2.01e-09	9606.ENSP00000201586,9606.ENSP00000209929,9606.ENSP00000222382,9606.ENSP00000222982,9606.ENSP00000254090,9606.ENSP00000260128,9606.ENSP00000260682,9606.ENSP00000265403,9606.ENSP00000285979,9606.ENSP00000303174,9606.ENSP00000304811,9606.ENSP00000304845,9606.ENSP00000305221,9606.ENSP00000310241,9606.ENSP00000311648,9606.ENSP00000320401,9606.ENSP00000334276,9606.ENSP00000337450,9606.ENSP00000341045,…	SULT2B1,FMO2,CYP3A43,CYP3A5,FMO5,SULF1,CYP2C9,UGT2B10,CYP2C18,UGT1A6,UGT2B7,UGT1A1,UGT2B4,SLC22A13,UGT8,UGT2B17,UGT2B28,CYP3A7,UGT2B15,CYP1A2,UGT1A10,UGT1A9,FMO1,SULF2,FMO4,FMO3,CYP2C8,CYP2C19,UGT1A4,UGT1A5,UGT1A7,UGT1A8,CYP1A1,UGT2B11,UGT1A3,CYP2E1,UGT2A2,CYP1B1,CYP3A4
GO Component	GO:0016323	Basolateral plasma membrane	13	226	0.99	1.37	2.38e-07	9606.ENSP00000279178,9606.ENSP00000285238,9606.ENSP00000300589,9606.ENSP00000321735,9606.ENSP00000333926,9606.ENSP00000337335,9606.ENSP00000361666,9606.ENSP00000367102,9606.ENSP00000382342,9606.ENSP00000414350,9606.ENSP00000441065,9606.ENSP00000463978,9606.ENSP00000494609	SLC22A9,ABCC3,NOD2,SLC16A8,ABCC5,SLC22A8,SLC22A7,SLC22A6,ABCC1,MUC20,SLC16A1,SLC16A3,ABCC4
GO Component	GO:0098590	Plasma membrane region	27	1237	0.57	0.91	4.54e-07	9606.ENSP00000264162,9606.ENSP00000266088,9606.ENSP00000279178,9606.ENSP00000285238,9606.ENSP00000300589,9606.ENSP00000301891,9606.ENSP00000302716,9606.ENSP00000310241,9606.ENSP00000321735,9606.ENSP00000323568,9606.ENSP00000333926,9606.ENSP00000337335,9606.ENSP00000361666,9606.ENSP00000366797,9606.ENSP00000367102,9606.ENSP00000382342,9606.ENSP00000402760,9606.ENSP00000414350,9606.ENSP00000441065,…	LCT,SLC5A1,SLC22A9,ABCC3,NOD2,SLC22A11,MUC17,SLC22A13,SLC16A8,SLC2A2,ABCC5,SLC22A8,SLC22A7,SLC22A12,SLC22A6,ABCC1,SLC22A5,MUC20,SLC16A1,SLC16A3,SLC16A2,ABCB1,MUC1,MUC13,ABCC4,ABCC2,ABCG2
GO Component	GO:0005886	Plasma membrane	61	5544	0.27	0.58	3.52e-06	9606.ENSP00000260010,9606.ENSP00000260128,9606.ENSP00000260682,9606.ENSP00000264162,9606.ENSP00000266088,9606.ENSP00000279178,9606.ENSP00000285238,9606.ENSP00000285979,9606.ENSP00000296420,9606.ENSP00000300589,9606.ENSP00000301891,9606.ENSP00000302716,9606.ENSP00000304845,9606.ENSP00000310241,9606.ENSP00000311648,9606.ENSP00000319991,9606.ENSP00000321735,9606.ENSP00000323568,9606.ENSP00000333926,…	TLR2,SULF1,CYP2C9,LCT,SLC5A1,SLC22A9,ABCC3,CYP2C18,EMCN,NOD2,SLC22A11,MUC17,UGT1A1,SLC22A13,UGT8,SLC16A6,SLC16A8,SLC2A2,ABCC5,SLC22A8,KCNJ11,SULF2,COMT,SLC16A4,CYP2C8,CYP2C19,SLC22A7,TLR4,MUC21,SLC22A12,SLC22A6,MUC3A,NFE2L2,MUC16,ABCC1,ITGA6,SLC16A5,SLC22A5,MUC6,MUC7,MUC20,MUC4,MUC15,MUC5B,SLC16A1,MUC12,SLC16A7,AKT1,SLC16A3,SLC16A2,ABCB1,MUC1,MUC13,MUC5AC,MUC2,ABCC4,MUC19,TLR5,ABCC2,ABCG2,MYD88
GO Component	GO:0071944	Cell periphery	62	6015	0.24	0.51	3e-05	9606.ENSP00000260010,9606.ENSP00000260128,9606.ENSP00000260682,9606.ENSP00000264162,9606.ENSP00000266088,9606.ENSP00000279178,9606.ENSP00000285238,9606.ENSP00000285979,9606.ENSP00000296420,9606.ENSP00000300589,9606.ENSP00000301891,9606.ENSP00000302716,9606.ENSP00000304845,9606.ENSP00000310241,9606.ENSP00000311648,9606.ENSP00000319991,9606.ENSP00000321735,9606.ENSP00000323568,9606.ENSP00000333926,…	TLR2,SULF1,CYP2C9,LCT,SLC5A1,SLC22A9,ABCC3,CYP2C18,EMCN,NOD2,SLC22A11,MUC17,UGT1A1,SLC22A13,UGT8,SLC16A6,SLC16A8,SLC2A2,ABCC5,SLC22A8,KCNJ11,SULF2,COMT,OVGP1,SLC16A4,CYP2C8,CYP2C19,SLC22A7,TLR4,MUC21,SLC22A12,SLC22A6,MUC3A,NFE2L2,MUC16,ABCC1,ITGA6,SLC16A5,SLC22A5,MUC6,MUC7,MUC20,MUC4,MUC15,MUC5B,SLC16A1,MUC12,SLC16A7,AKT1,SLC16A3,SLC16A2,ABCB1,MUC1,MUC13,MUC5AC,MUC2,ABCC4,MUC19,TLR5,ABCC2,ABCG2,M…
GO Component	GO:0098591	External side of apical plasma membrane	4	7	1.99	1.25	3.84e-05	9606.ENSP00000264162,9606.ENSP00000478255,9606.ENSP00000494609,9606.ENSP00000498246	LCT,ABCB1,ABCC4,ABCG2
GO Component	GO:0005794	Golgi apparatus	27	1650	0.44	0.62	0.0001	9606.ENSP00000235835,9606.ENSP00000260010,9606.ENSP00000260128,9606.ENSP00000300589,9606.ENSP00000302716,9606.ENSP00000310241,9606.ENSP00000333926,9606.ENSP00000353007,9606.ENSP00000363089,9606.ENSP00000365473,9606.ENSP00000368771,9606.ENSP00000380252,9606.ENSP00000381008,9606.ENSP00000406861,9606.ENSP00000407422,9606.ENSP00000414350,9606.ENSP00000417498,9606.ENSP00000431983,9606.ENSP00000436812,…	AKR7A2,TLR2,SULF1,NOD2,MUC17,SLC22A13,ABCC5,SULF2,TLR4,MUC21,MUC3A,NFE2L2,MUC16,MUC6,MUC7,MUC20,MUC4,MUC15,MUC5B,CYP2E1,MUC12,MUC1,MUC13,MUC5AC,MUC2,ABCC4,MUC19
GO Component	GO:0031226	Intrinsic component of plasma membrane	28	1788	0.42	0.6	0.00014	9606.ENSP00000260010,9606.ENSP00000264162,9606.ENSP00000266088,9606.ENSP00000285238,9606.ENSP00000300589,9606.ENSP00000301891,9606.ENSP00000304845,9606.ENSP00000319991,9606.ENSP00000321735,9606.ENSP00000323568,9606.ENSP00000333926,9606.ENSP00000345708,9606.ENSP00000358794,9606.ENSP00000361666,9606.ENSP00000363089,9606.ENSP00000367102,9606.ENSP00000382342,9606.ENSP00000386896,9606.ENSP00000390564,…	TLR2,LCT,SLC5A1,ABCC3,NOD2,SLC22A11,UGT1A1,SLC16A6,SLC16A8,SLC2A2,ABCC5,KCNJ11,SLC16A4,SLC22A7,TLR4,SLC22A6,ABCC1,ITGA6,SLC16A5,MUC4,SLC16A1,MUC12,SLC16A7,SLC16A3,SLC16A2,MUC1,TLR5,ABCC2
GO Component	GO:0005887	Integral component of plasma membrane	27	1706	0.43	0.59	0.00018	9606.ENSP00000260010,9606.ENSP00000264162,9606.ENSP00000266088,9606.ENSP00000285238,9606.ENSP00000301891,9606.ENSP00000304845,9606.ENSP00000319991,9606.ENSP00000321735,9606.ENSP00000323568,9606.ENSP00000333926,9606.ENSP00000345708,9606.ENSP00000358794,9606.ENSP00000361666,9606.ENSP00000363089,9606.ENSP00000367102,9606.ENSP00000382342,9606.ENSP00000386896,9606.ENSP00000390564,9606.ENSP00000417498,…	TLR2,LCT,SLC5A1,ABCC3,SLC22A11,UGT1A1,SLC16A6,SLC16A8,SLC2A2,ABCC5,KCNJ11,SLC16A4,SLC22A7,TLR4,SLC22A6,ABCC1,ITGA6,SLC16A5,MUC4,SLC16A1,MUC12,SLC16A7,SLC16A3,SLC16A2,MUC1,TLR5,ABCC2
GO Component	GO:0031090	Organelle membrane	43	3673	0.3	0.5	0.00024	9606.ENSP00000209929,9606.ENSP00000222382,9606.ENSP00000222982,9606.ENSP00000226444,9606.ENSP00000254090,9606.ENSP00000260010,9606.ENSP00000260682,9606.ENSP00000265403,9606.ENSP00000285979,9606.ENSP00000303174,9606.ENSP00000304811,9606.ENSP00000304845,9606.ENSP00000305221,9606.ENSP00000320401,9606.ENSP00000333926,9606.ENSP00000334276,9606.ENSP00000337450,9606.ENSP00000341045,9606.ENSP00000342007,…	FMO2,CYP3A43,CYP3A5,SULT1E1,FMO5,TLR2,CYP2C9,UGT2B10,CYP2C18,UGT1A6,UGT2B7,UGT1A1,UGT2B4,UGT2B17,ABCC5,UGT2B28,CYP3A7,UGT2B15,CYP1A2,UGT1A10,UGT1A9,FMO1,FMO4,FMO3,ABCD3,CYP2C8,CYP2C19,UGT1A4,UGT1A5,UGT1A7,UGT1A8,TLR4,CYP1A1,UGT2B11,UGT1A3,CYP2E1,SLC16A3,UGT2A2,CYP1B1,ABCC4,ABCG2,MYD88,CYP3A4
GO Component	GO:0110165	Cellular anatomical entity	116	18293	0.03	0.26	0.0163	9606.ENSP00000201586,9606.ENSP00000209929,9606.ENSP00000222002,9606.ENSP00000222382,9606.ENSP00000222982,9606.ENSP00000225831,9606.ENSP00000226444,9606.ENSP00000228872,9606.ENSP00000235835,9606.ENSP00000242057,9606.ENSP00000251566,9606.ENSP00000254090,9606.ENSP00000260010,9606.ENSP00000260128,9606.ENSP00000260682,9606.ENSP00000264162,9606.ENSP00000265403,9606.ENSP00000266088,9606.ENSP00000272452,…	SULT2B1,FMO2,SULT2A1,CYP3A43,CYP3A5,CCL2,SULT1E1,CDKN1B,AKR7A2,AHR,UGT2A3,FMO5,TLR2,SULF1,CYP2C9,LCT,UGT2B10,SLC5A1,SULT1C4,SLC22A9,ABCC3,CYP2C18,EMCN,NOD2,SLC22A11,MUC17,GUSB,UGT1A6,UGT2B7,UGT1A1,UGT2B4,SULT1B1,SLC22A13,UGT8,SULT1C2,SLC16A6,UGT2B17,SLC16A8,SLC2A2,SLC22A10,SULT4A1,ABCC5,UGT2B28,SLC22A8,CYP3A7,UGT2B15,CYP1A2,UGT1A10,KCNJ11,UGT1A9,FMO1,ARNT,SULF2,COMT,FMO4,FMO3,OVGP1,SLC16A4,ABCD3,…
GO Component	GO:0005737	Cytoplasm	89	12056	0.1	0.26	0.0245	9606.ENSP00000201586,9606.ENSP00000209929,9606.ENSP00000222002,9606.ENSP00000222382,9606.ENSP00000222982,9606.ENSP00000226444,9606.ENSP00000228872,9606.ENSP00000235835,9606.ENSP00000242057,9606.ENSP00000254090,9606.ENSP00000260010,9606.ENSP00000260128,9606.ENSP00000260682,9606.ENSP00000265403,9606.ENSP00000266088,9606.ENSP00000272452,9606.ENSP00000285979,9606.ENSP00000300589,9606.ENSP00000302716,…	SULT2B1,FMO2,SULT2A1,CYP3A43,CYP3A5,SULT1E1,CDKN1B,AKR7A2,AHR,FMO5,TLR2,SULF1,CYP2C9,UGT2B10,SLC5A1,SULT1C4,CYP2C18,NOD2,MUC17,GUSB,UGT1A6,UGT2B7,UGT1A1,UGT2B4,SULT1B1,SLC22A13,UGT8,SULT1C2,UGT2B17,SLC2A2,SULT4A1,ABCC5,UGT2B28,CYP3A7,UGT2B15,CYP1A2,UGT1A10,UGT1A9,FMO1,ARNT,SULF2,COMT,FMO4,FMO3,OVGP1,ABCD3,CYP2C8,CYP2C19,UGT1A4,UGT1A5,UGT1A7,UGT1A8,TLR4,MUC21,MUC3A,PDHA1,CYP1A1,SULT1A3,SULT1A1,SUL…
GO Component	GO:0070701	Mucus layer	2	3	2.05	0.45	0.0264	9606.ENSP00000485659,9606.ENSP00000494061	MUC5AC,MUC2
GO Component	GO:0005903	Brush border	5	106	0.9	0.37	0.0374	9606.ENSP00000266088,9606.ENSP00000323568,9606.ENSP00000366797,9606.ENSP00000402760,9606.ENSP00000498246	SLC5A1,SLC2A2,SLC22A12,SLC22A5,ABCG2
GO Component	GO:0031526	Brush border membrane	4	59	1.06	0.39	0.0374	9606.ENSP00000266088,9606.ENSP00000366797,9606.ENSP00000402760,9606.ENSP00000498246	SLC5A1,SLC22A12,SLC22A5,ABCG2
GO Component	GO:0009897	External side of plasma membrane	9	388	0.6	0.34	0.0388	9606.ENSP00000264162,9606.ENSP00000296420,9606.ENSP00000301891,9606.ENSP00000302716,9606.ENSP00000363089,9606.ENSP00000386896,9606.ENSP00000478255,9606.ENSP00000494609,9606.ENSP00000498246	LCT,EMCN,SLC22A11,MUC17,TLR4,ITGA6,ABCB1,ABCC4,ABCG2
STRING clusters	CL:9389	Retinol metabolism, and CYP2E1 reactions	29	48	2.01	9.73	1.98e-42	9606.ENSP00000222002,9606.ENSP00000222982,9606.ENSP00000226444,9606.ENSP00000251566,9606.ENSP00000285979,9606.ENSP00000302728,9606.ENSP00000303174,9606.ENSP00000304811,9606.ENSP00000304845,9606.ENSP00000305221,9606.ENSP00000308770,9606.ENSP00000320401,9606.ENSP00000334276,9606.ENSP00000337450,9606.ENSP00000341045,9606.ENSP00000342007,9606.ENSP00000343838,9606.ENSP00000346768,9606.ENSP00000356729,…	SULT2A1,CYP3A5,SULT1E1,UGT2A3,CYP2C18,GUSB,UGT1A6,UGT2B7,UGT1A1,UGT2B4,SULT1B1,UGT2B17,UGT2B28,CYP3A7,UGT2B15,CYP1A2,UGT1A10,UGT1A9,FMO3,CYP2C8,UGT1A4,UGT1A5,UGT1A7,UGT1A8,UGT2B11,UGT1A3,CYP2E1,UGT2A2,CYP3A4
STRING clusters	CL:9385	Steroid hormone biosynthesis, and Oxidation by cytochrome P450	35	135	1.64	7.64	8.45e-42	9606.ENSP00000201586,9606.ENSP00000209929,9606.ENSP00000222002,9606.ENSP00000222382,9606.ENSP00000222982,9606.ENSP00000226444,9606.ENSP00000251566,9606.ENSP00000265403,9606.ENSP00000285979,9606.ENSP00000302728,9606.ENSP00000303174,9606.ENSP00000304811,9606.ENSP00000304845,9606.ENSP00000305221,9606.ENSP00000308770,9606.ENSP00000320401,9606.ENSP00000334276,9606.ENSP00000337450,9606.ENSP00000341045,…	SULT2B1,FMO2,SULT2A1,CYP3A43,CYP3A5,SULT1E1,UGT2A3,UGT2B10,CYP2C18,GUSB,UGT1A6,UGT2B7,UGT1A1,UGT2B4,SULT1B1,UGT2B17,UGT2B28,CYP3A7,UGT2B15,CYP1A2,UGT1A10,UGT1A9,FMO1,FMO4,FMO3,CYP2C8,UGT1A4,UGT1A5,UGT1A7,UGT1A8,UGT2B11,UGT1A3,CYP2E1,UGT2A2,CYP3A4
STRING clusters	CL:9388	Steroid hormone biosynthesis, and Arachidonic acid monooxygenase activity	30	71	1.86	8.71	8.32e-41	9606.ENSP00000222002,9606.ENSP00000222982,9606.ENSP00000226444,9606.ENSP00000251566,9606.ENSP00000265403,9606.ENSP00000285979,9606.ENSP00000302728,9606.ENSP00000303174,9606.ENSP00000304811,9606.ENSP00000304845,9606.ENSP00000305221,9606.ENSP00000308770,9606.ENSP00000320401,9606.ENSP00000334276,9606.ENSP00000337450,9606.ENSP00000341045,9606.ENSP00000342007,9606.ENSP00000343838,9606.ENSP00000346768,…	SULT2A1,CYP3A5,SULT1E1,UGT2A3,UGT2B10,CYP2C18,GUSB,UGT1A6,UGT2B7,UGT1A1,UGT2B4,SULT1B1,UGT2B17,UGT2B28,CYP3A7,UGT2B15,CYP1A2,UGT1A10,UGT1A9,FMO3,CYP2C8,UGT1A4,UGT1A5,UGT1A7,UGT1A8,UGT2B11,UGT1A3,CYP2E1,UGT2A2,CYP3A4
STRING clusters	CL:9387	Steroid hormone biosynthesis, and Oxidation by cytochrome P450	31	86	1.79	8.33	1.22e-40	9606.ENSP00000222002,9606.ENSP00000222382,9606.ENSP00000222982,9606.ENSP00000226444,9606.ENSP00000251566,9606.ENSP00000265403,9606.ENSP00000285979,9606.ENSP00000302728,9606.ENSP00000303174,9606.ENSP00000304811,9606.ENSP00000304845,9606.ENSP00000305221,9606.ENSP00000308770,9606.ENSP00000320401,9606.ENSP00000334276,9606.ENSP00000337450,9606.ENSP00000341045,9606.ENSP00000342007,9606.ENSP00000343838,…	SULT2A1,CYP3A43,CYP3A5,SULT1E1,UGT2A3,UGT2B10,CYP2C18,GUSB,UGT1A6,UGT2B7,UGT1A1,UGT2B4,SULT1B1,UGT2B17,UGT2B28,CYP3A7,UGT2B15,CYP1A2,UGT1A10,UGT1A9,FMO3,CYP2C8,UGT1A4,UGT1A5,UGT1A7,UGT1A8,UGT2B11,UGT1A3,CYP2E1,UGT2A2,CYP3A4
STRING clusters	CL:9386	Steroid hormone biosynthesis, and Oxidation by cytochrome P450	32	129	1.62	7.03	1.02e-37	9606.ENSP00000201586,9606.ENSP00000222002,9606.ENSP00000222382,9606.ENSP00000222982,9606.ENSP00000226444,9606.ENSP00000251566,9606.ENSP00000265403,9606.ENSP00000285979,9606.ENSP00000302728,9606.ENSP00000303174,9606.ENSP00000304811,9606.ENSP00000304845,9606.ENSP00000305221,9606.ENSP00000308770,9606.ENSP00000320401,9606.ENSP00000334276,9606.ENSP00000337450,9606.ENSP00000341045,9606.ENSP00000342007,…	SULT2B1,SULT2A1,CYP3A43,CYP3A5,SULT1E1,UGT2A3,UGT2B10,CYP2C18,GUSB,UGT1A6,UGT2B7,UGT1A1,UGT2B4,SULT1B1,UGT2B17,UGT2B28,CYP3A7,UGT2B15,CYP1A2,UGT1A10,UGT1A9,FMO3,CYP2C8,UGT1A4,UGT1A5,UGT1A7,UGT1A8,UGT2B11,UGT1A3,CYP2E1,UGT2A2,CYP3A4
STRING clusters	CL:9391	Retinol metabolism, and CYP2E1 reactions	24	43	1.98	8.1	1.26e-34	9606.ENSP00000222982,9606.ENSP00000251566,9606.ENSP00000285979,9606.ENSP00000302728,9606.ENSP00000303174,9606.ENSP00000304811,9606.ENSP00000304845,9606.ENSP00000320401,9606.ENSP00000334276,9606.ENSP00000337450,9606.ENSP00000341045,9606.ENSP00000342007,9606.ENSP00000343838,9606.ENSP00000346768,9606.ENSP00000360317,9606.ENSP00000362508,9606.ENSP00000362513,9606.ENSP00000362525,9606.ENSP00000362549,…	CYP3A5,UGT2A3,CYP2C18,GUSB,UGT1A6,UGT2B7,UGT1A1,UGT2B17,UGT2B28,CYP3A7,UGT2B15,CYP1A2,UGT1A10,UGT1A9,CYP2C8,UGT1A4,UGT1A5,UGT1A7,UGT1A8,UGT2B11,UGT1A3,CYP2E1,UGT2A2,CYP3A4
STRING clusters	CL:9392	Retinol metabolism, and CYP2E1 reactions	21	38	1.97	7.15	5.48e-30	9606.ENSP00000222982,9606.ENSP00000285979,9606.ENSP00000303174,9606.ENSP00000304811,9606.ENSP00000304845,9606.ENSP00000320401,9606.ENSP00000334276,9606.ENSP00000337450,9606.ENSP00000341045,9606.ENSP00000342007,9606.ENSP00000343838,9606.ENSP00000346768,9606.ENSP00000360317,9606.ENSP00000362508,9606.ENSP00000362513,9606.ENSP00000362525,9606.ENSP00000362549,9606.ENSP00000387683,9606.ENSP00000418532,…	CYP3A5,CYP2C18,UGT1A6,UGT2B7,UGT1A1,UGT2B17,UGT2B28,CYP3A7,UGT2B15,CYP1A2,UGT1A10,UGT1A9,CYP2C8,UGT1A4,UGT1A5,UGT1A7,UGT1A8,UGT2B11,UGT1A3,CYP2E1,CYP3A4
STRING clusters	CL:9393	Retinol metabolism	19	32	2	6.69	1.93e-27	9606.ENSP00000222982,9606.ENSP00000285979,9606.ENSP00000303174,9606.ENSP00000304811,9606.ENSP00000304845,9606.ENSP00000334276,9606.ENSP00000337450,9606.ENSP00000342007,9606.ENSP00000343838,9606.ENSP00000346768,9606.ENSP00000360317,9606.ENSP00000362508,9606.ENSP00000362513,9606.ENSP00000362525,9606.ENSP00000362549,9606.ENSP00000387683,9606.ENSP00000418532,9606.ENSP00000440689,9606.ENSP00000498939	CYP3A5,CYP2C18,UGT1A6,UGT2B7,UGT1A1,UGT2B28,CYP3A7,CYP1A2,UGT1A10,UGT1A9,CYP2C8,UGT1A4,UGT1A5,UGT1A7,UGT1A8,UGT2B11,UGT1A3,CYP2E1,CYP3A4
STRING clusters	CL:28243	Defective GALNT3 causes HFTC, and Mesothelin	16	22	2.09	6.05	6.59e-24	9606.ENSP00000302716,9606.ENSP00000365473,9606.ENSP00000368771,9606.ENSP00000381008,9606.ENSP00000406861,9606.ENSP00000407422,9606.ENSP00000414350,9606.ENSP00000417498,9606.ENSP00000431983,9606.ENSP00000436812,9606.ENSP00000441929,9606.ENSP00000484824,9606.ENSP00000485028,9606.ENSP00000485659,9606.ENSP00000494061,9606.ENSP00000495398	MUC17,MUC21,MUC3A,MUC16,MUC6,MUC7,MUC20,MUC4,MUC15,MUC5B,MUC12,MUC1,MUC13,MUC5AC,MUC2,MUC19
STRING clusters	CL:28247	Defective GALNT3 causes HFTC	15	17	2.18	6	3.03e-23	9606.ENSP00000302716,9606.ENSP00000365473,9606.ENSP00000368771,9606.ENSP00000406861,9606.ENSP00000407422,9606.ENSP00000414350,9606.ENSP00000417498,9606.ENSP00000431983,9606.ENSP00000436812,9606.ENSP00000441929,9606.ENSP00000484824,9606.ENSP00000485028,9606.ENSP00000485659,9606.ENSP00000494061,9606.ENSP00000495398	MUC17,MUC21,MUC3A,MUC6,MUC7,MUC20,MUC4,MUC15,MUC5B,MUC12,MUC1,MUC13,MUC5AC,MUC2,MUC19
STRING clusters	CL:28251	Defective GALNT3 causes HFTC	12	12	2.23	4.94	8.1e-19	9606.ENSP00000302716,9606.ENSP00000406861,9606.ENSP00000407422,9606.ENSP00000414350,9606.ENSP00000417498,9606.ENSP00000431983,9606.ENSP00000436812,9606.ENSP00000441929,9606.ENSP00000484824,9606.ENSP00000485028,9606.ENSP00000485659,9606.ENSP00000494061	MUC17,MUC6,MUC7,MUC20,MUC4,MUC15,MUC5B,MUC12,MUC1,MUC13,MUC5AC,MUC2
STRING clusters	CL:9431	Gilbert syndrome, and Caffeine metabolism	10	13	2.12	3.81	1.04e-14	9606.ENSP00000303174,9606.ENSP00000304845,9606.ENSP00000342007,9606.ENSP00000343838,9606.ENSP00000346768,9606.ENSP00000362508,9606.ENSP00000362525,9606.ENSP00000362549,9606.ENSP00000418532,9606.ENSP00000440689	UGT1A6,UGT1A1,CYP1A2,UGT1A10,UGT1A9,UGT1A4,UGT1A7,UGT1A8,UGT1A3,CYP2E1
STRING clusters	CL:12193	Mixed, incl. Xenobiotic transport, and Recycling of bile acids and salts	14	71	1.52	3.2	1.9e-14	9606.ENSP00000279178,9606.ENSP00000285238,9606.ENSP00000301891,9606.ENSP00000310241,9606.ENSP00000333926,9606.ENSP00000337335,9606.ENSP00000361666,9606.ENSP00000366797,9606.ENSP00000367102,9606.ENSP00000402760,9606.ENSP00000478255,9606.ENSP00000494609,9606.ENSP00000497274,9606.ENSP00000498246	SLC22A9,ABCC3,SLC22A11,SLC22A13,ABCC5,SLC22A8,SLC22A7,SLC22A12,SLC22A6,SLC22A5,ABCB1,ABCC4,ABCC2,ABCG2
STRING clusters	CL:12196	Mixed, incl. Xenobiotic transport, and Recycling of bile acids and salts	13	53	1.62	3.32	2.02e-14	9606.ENSP00000279178,9606.ENSP00000285238,9606.ENSP00000301891,9606.ENSP00000310241,9606.ENSP00000337335,9606.ENSP00000361666,9606.ENSP00000366797,9606.ENSP00000367102,9606.ENSP00000402760,9606.ENSP00000478255,9606.ENSP00000494609,9606.ENSP00000497274,9606.ENSP00000498246	SLC22A9,ABCC3,SLC22A11,SLC22A13,SLC22A8,SLC22A7,SLC22A12,SLC22A6,SLC22A5,ABCB1,ABCC4,ABCC2,ABCG2
STRING clusters	CL:12197	Xenobiotic transport, and Sodium-independent organic anion transmembrane transporter activity	12	38	1.73	3.44	2.19e-14	9606.ENSP00000279178,9606.ENSP00000301891,9606.ENSP00000310241,9606.ENSP00000337335,9606.ENSP00000361666,9606.ENSP00000366797,9606.ENSP00000367102,9606.ENSP00000402760,9606.ENSP00000478255,9606.ENSP00000494609,9606.ENSP00000497274,9606.ENSP00000498246	SLC22A9,SLC22A11,SLC22A13,SLC22A8,SLC22A7,SLC22A12,SLC22A6,SLC22A5,ABCB1,ABCC4,ABCC2,ABCG2
STRING clusters	CL:12192	SLC-mediated transmembrane transport, and ABC-type xenobiotic transporter activity	15	127	1.3	2.56	1.03e-12	9606.ENSP00000279178,9606.ENSP00000285238,9606.ENSP00000301891,9606.ENSP00000310241,9606.ENSP00000327569,9606.ENSP00000333926,9606.ENSP00000337335,9606.ENSP00000361666,9606.ENSP00000366797,9606.ENSP00000367102,9606.ENSP00000402760,9606.ENSP00000478255,9606.ENSP00000494609,9606.ENSP00000497274,9606.ENSP00000498246	SLC22A9,ABCC3,SLC22A11,SLC22A13,SLC22A10,ABCC5,SLC22A8,SLC22A7,SLC22A12,SLC22A6,SLC22A5,ABCB1,ABCC4,ABCC2,ABCG2
STRING clusters	CL:12190	SLC-mediated transmembrane transport, and Monocarboxylic acid transmembrane transporter activity	16	171	1.2	2.33	3.14e-12	9606.ENSP00000279178,9606.ENSP00000285238,9606.ENSP00000301891,9606.ENSP00000310241,9606.ENSP00000327569,9606.ENSP00000333926,9606.ENSP00000337335,9606.ENSP00000361666,9606.ENSP00000366797,9606.ENSP00000367102,9606.ENSP00000390564,9606.ENSP00000402760,9606.ENSP00000478255,9606.ENSP00000494609,9606.ENSP00000497274,9606.ENSP00000498246	SLC22A9,ABCC3,SLC22A11,SLC22A13,SLC22A10,ABCC5,SLC22A8,SLC22A7,SLC22A12,SLC22A6,SLC16A5,SLC22A5,ABCB1,ABCC4,ABCC2,ABCG2
STRING clusters	CL:9394	Retinoic acid 4-hydroxylase activity, and Arachidonic acid monooxygenase activity	9	19	1.91	2.99	7.06e-12	9606.ENSP00000222982,9606.ENSP00000285979,9606.ENSP00000304811,9606.ENSP00000334276,9606.ENSP00000337450,9606.ENSP00000360317,9606.ENSP00000362513,9606.ENSP00000387683,9606.ENSP00000498939	CYP3A5,CYP2C18,UGT2B7,UGT2B28,CYP3A7,CYP2C8,UGT1A5,UGT2B11,CYP3A4
STRING clusters	CL:12201	Mixed, incl. Atorvastatin ADME, and Oligopeptide transporter	7	15	1.9	2.25	5.69e-09	9606.ENSP00000279178,9606.ENSP00000337335,9606.ENSP00000361666,9606.ENSP00000402760,9606.ENSP00000478255,9606.ENSP00000497274,9606.ENSP00000498246	SLC22A9,SLC22A8,SLC22A7,SLC22A5,ABCB1,ABCC2,ABCG2
STRING clusters	CL:9397	Retinoic acid 4-hydroxylase activity, and Lauric acid metabolic process	6	14	1.86	1.84	2.09e-07	9606.ENSP00000222982,9606.ENSP00000285979,9606.ENSP00000304811,9606.ENSP00000337450,9606.ENSP00000360317,9606.ENSP00000498939	CYP3A5,CYP2C18,UGT2B7,CYP3A7,CYP2C8,CYP3A4
STRING clusters	CL:28253	Tubular adenocarcinoma, and Nonspecific interstitial pneumonia	5	5	2.23	1.88	2.45e-07	9606.ENSP00000406861,9606.ENSP00000414350,9606.ENSP00000417498,9606.ENSP00000484824,9606.ENSP00000494061	MUC6,MUC20,MUC4,MUC1,MUC2
STRING clusters	CL:9436	Flavonoid glucuronidation	5	5	2.23	1.88	2.45e-07	9606.ENSP00000303174,9606.ENSP00000304845,9606.ENSP00000346768,9606.ENSP00000362549,9606.ENSP00000418532	UGT1A6,UGT1A1,UGT1A9,UGT1A8,UGT1A3
STRING clusters	CL:9399	Lipid hydroxylation, and Oxylipin metabolic process	5	8	2.03	1.67	1.15e-06	9606.ENSP00000222982,9606.ENSP00000304811,9606.ENSP00000337450,9606.ENSP00000360317,9606.ENSP00000498939	CYP3A5,UGT2B7,CYP3A7,CYP2C8,CYP3A4
STRING clusters	CL:12202	Atorvastatin ADME, and Ciprofloxacin ADME	5	10	1.93	1.56	2.58e-06	9606.ENSP00000337335,9606.ENSP00000361666,9606.ENSP00000478255,9606.ENSP00000497274,9606.ENSP00000498246	SLC22A8,SLC22A7,ABCB1,ABCC2,ABCG2
STRING clusters	CL:28925	Aryl sulfotransferase activity, and Glycosyltransferase family 43	5	11	1.89	1.52	3.63e-06	9606.ENSP00000319622,9606.ENSP00000332565,9606.ENSP00000378570,9606.ENSP00000378972,9606.ENSP00000378992	SULT1C2,SULT4A1,SULT1A3,SULT1A1,SULT1A2
STRING clusters	CL:12698	Carbonate dehydratase activity, and Proton-coupled monocarboxylate transport	6	27	1.58	1.43	4.63e-06	9606.ENSP00000319991,9606.ENSP00000321735,9606.ENSP00000358794,9606.ENSP00000441065,9606.ENSP00000448071,9606.ENSP00000463978	SLC16A6,SLC16A8,SLC16A4,SLC16A1,SLC16A7,SLC16A3
STRING clusters	CL:12249	Urate transport, and Organic anion transport	5	12	1.85	1.48	4.82e-06	9606.ENSP00000301891,9606.ENSP00000310241,9606.ENSP00000366797,9606.ENSP00000367102,9606.ENSP00000494609	SLC22A11,SLC22A13,SLC22A12,SLC22A6,ABCC4
STRING clusters	CL:12204	Ciprofloxacin ADME, and Atorvastatin ADME	4	5	2.13	1.36	1.7e-05	9606.ENSP00000337335,9606.ENSP00000361666,9606.ENSP00000497274,9606.ENSP00000498246	SLC22A8,SLC22A7,ABCC2,ABCG2
STRING clusters	CL:28927	Aryl sulfotransferase activity	4	5	2.13	1.36	1.7e-05	9606.ENSP00000319622,9606.ENSP00000378570,9606.ENSP00000378972,9606.ENSP00000378992	SULT1C2,SULT1A3,SULT1A1,SULT1A2
STRING clusters	CL:12736	Proton-coupled monocarboxylate transport	4	6	2.05	1.3	2.67e-05	9606.ENSP00000321735,9606.ENSP00000441065,9606.ENSP00000448071,9606.ENSP00000463978	SLC16A8,SLC16A1,SLC16A7,SLC16A3
STRING clusters	CL:28758	Mixed, incl. Glycosaminoglycan metabolism, and Sulfotransferase activity	8	130	1.02	0.9	0.00017	9606.ENSP00000260128,9606.ENSP00000272452,9606.ENSP00000319622,9606.ENSP00000332565,9606.ENSP00000353007,9606.ENSP00000378570,9606.ENSP00000378972,9606.ENSP00000378992	SULF1,SULT1C4,SULT1C2,SULT4A1,SULF2,SULT1A3,SULT1A1,SULT1A2
STRING clusters	CL:28762	Glycosaminoglycan metabolism, and Sulfation	7	95	1.1	0.89	0.00026	9606.ENSP00000272452,9606.ENSP00000319622,9606.ENSP00000332565,9606.ENSP00000353007,9606.ENSP00000378570,9606.ENSP00000378972,9606.ENSP00000378992	SULT1C4,SULT1C2,SULT4A1,SULF2,SULT1A3,SULT1A1,SULT1A2
STRING clusters	CL:12531	Mixed, incl. Transport of inorganic cations/anions and amino acids/oligopeptides, and Carbonate dehydratase activity	7	115	1.01	0.76	0.0008	9606.ENSP00000266088,9606.ENSP00000319991,9606.ENSP00000321735,9606.ENSP00000358794,9606.ENSP00000441065,9606.ENSP00000448071,9606.ENSP00000463978	SLC5A1,SLC16A6,SLC16A8,SLC16A4,SLC16A1,SLC16A7,SLC16A3
STRING clusters	CL:9467	Heroin metabolism, and Sly syndrome	3	5	2.01	0.84	0.0011	9606.ENSP00000251566,9606.ENSP00000302728,9606.ENSP00000475028	UGT2A3,GUSB,UGT2A2
STRING clusters	CL:9643	Flavin monooxygenase FMO, and Lauric acid metabolic process	3	6	1.93	0.8	0.0016	9606.ENSP00000209929,9606.ENSP00000346901,9606.ENSP00000356723	FMO2,FMO1,FMO4
STRING clusters	CL:12251	Hyperuricemia, and Lactate transmembrane transporter activity	3	7	1.86	0.75	0.0022	9606.ENSP00000301891,9606.ENSP00000366797,9606.ENSP00000494609	SLC22A11,SLC22A12,ABCC4
STRING clusters	CL:16730	Mixed, incl. MyD88-dependent toll-like receptor signaling pathway, and TRIF-mediated programmed cell death	4	32	1.33	0.62	0.0054	9606.ENSP00000260010,9606.ENSP00000363089,9606.ENSP00000496355,9606.ENSP00000498321	TLR2,TLR4,TLR5,MYD88
STRING clusters	CL:16734	MYD88 distinct input-output pathway, and UNC93B1 deficiency - HSE	3	12	1.63	0.59	0.0079	9606.ENSP00000260010,9606.ENSP00000496355,9606.ENSP00000498321	TLR2,TLR5,MYD88
STRING clusters	CL:16584	Toll-like Receptor Cascades, and Novel intracellular components of RIG-I-like receptor pathway	5	105	0.91	0.36	0.0424	9606.ENSP00000260010,9606.ENSP00000300589,9606.ENSP00000363089,9606.ENSP00000496355,9606.ENSP00000498321	TLR2,NOD2,TLR4,TLR5,MYD88
KEGG	hsa05204	Chemical carcinogenesis	34	76	1.88	10.01	4.13e-48	9606.ENSP00000222002,9606.ENSP00000222382,9606.ENSP00000222982,9606.ENSP00000251566,9606.ENSP00000260682,9606.ENSP00000265403,9606.ENSP00000285979,9606.ENSP00000303174,9606.ENSP00000304811,9606.ENSP00000304845,9606.ENSP00000305221,9606.ENSP00000320401,9606.ENSP00000334276,9606.ENSP00000337450,9606.ENSP00000341045,9606.ENSP00000342007,9606.ENSP00000343838,9606.ENSP00000346768,9606.ENSP00000351407,…	SULT2A1,CYP3A43,CYP3A5,UGT2A3,CYP2C9,UGT2B10,CYP2C18,UGT1A6,UGT2B7,UGT1A1,UGT2B4,UGT2B17,UGT2B28,CYP3A7,UGT2B15,CYP1A2,UGT1A10,UGT1A9,ARNT,CYP2C8,CYP2C19,UGT1A4,UGT1A5,UGT1A7,UGT1A8,CYP1A1,SULT1A1,SULT1A2,UGT2B11,UGT1A3,CYP2E1,UGT2A2,CYP1B1,CYP3A4
KEGG	hsa00982	Drug metabolism - cytochrome P450	30	64	1.9	9.28	7.3e-43	9606.ENSP00000209929,9606.ENSP00000222982,9606.ENSP00000251566,9606.ENSP00000254090,9606.ENSP00000260682,9606.ENSP00000265403,9606.ENSP00000303174,9606.ENSP00000304811,9606.ENSP00000304845,9606.ENSP00000305221,9606.ENSP00000320401,9606.ENSP00000334276,9606.ENSP00000341045,9606.ENSP00000342007,9606.ENSP00000343838,9606.ENSP00000346768,9606.ENSP00000346901,9606.ENSP00000356723,9606.ENSP00000356729,…	FMO2,CYP3A5,UGT2A3,FMO5,CYP2C9,UGT2B10,UGT1A6,UGT2B7,UGT1A1,UGT2B4,UGT2B17,UGT2B28,UGT2B15,CYP1A2,UGT1A10,UGT1A9,FMO1,FMO4,FMO3,CYP2C8,CYP2C19,UGT1A4,UGT1A5,UGT1A7,UGT1A8,UGT2B11,UGT1A3,CYP2E1,UGT2A2,CYP3A4
KEGG	hsa00140	Steroid hormone biosynthesis	28	60	1.9	8.78	5.7e-40	9606.ENSP00000201586,9606.ENSP00000222982,9606.ENSP00000226444,9606.ENSP00000251566,9606.ENSP00000265403,9606.ENSP00000303174,9606.ENSP00000304811,9606.ENSP00000304845,9606.ENSP00000305221,9606.ENSP00000320401,9606.ENSP00000334276,9606.ENSP00000337450,9606.ENSP00000341045,9606.ENSP00000342007,9606.ENSP00000343838,9606.ENSP00000346768,9606.ENSP00000354511,9606.ENSP00000362508,9606.ENSP00000362513,…	SULT2B1,CYP3A5,SULT1E1,UGT2A3,UGT2B10,UGT1A6,UGT2B7,UGT1A1,UGT2B4,UGT2B17,UGT2B28,CYP3A7,UGT2B15,CYP1A2,UGT1A10,UGT1A9,COMT,UGT1A4,UGT1A5,UGT1A7,UGT1A8,CYP1A1,UGT2B11,UGT1A3,CYP2E1,UGT2A2,CYP1B1,CYP3A4
KEGG	hsa00980	Metabolism of xenobiotics by cytochrome P450	27	69	1.82	7.92	6.63e-37	9606.ENSP00000222002,9606.ENSP00000222982,9606.ENSP00000235835,9606.ENSP00000251566,9606.ENSP00000260682,9606.ENSP00000265403,9606.ENSP00000303174,9606.ENSP00000304811,9606.ENSP00000304845,9606.ENSP00000305221,9606.ENSP00000320401,9606.ENSP00000334276,9606.ENSP00000341045,9606.ENSP00000342007,9606.ENSP00000343838,9606.ENSP00000346768,9606.ENSP00000362508,9606.ENSP00000362513,9606.ENSP00000362525,…	SULT2A1,CYP3A5,AKR7A2,UGT2A3,CYP2C9,UGT2B10,UGT1A6,UGT2B7,UGT1A1,UGT2B4,UGT2B17,UGT2B28,UGT2B15,CYP1A2,UGT1A10,UGT1A9,UGT1A4,UGT1A5,UGT1A7,UGT1A8,CYP1A1,UGT2B11,UGT1A3,CYP2E1,UGT2A2,CYP1B1,CYP3A4
KEGG	hsa04976	Bile secretion	28	88	1.73	7.41	2.49e-36	9606.ENSP00000222002,9606.ENSP00000251566,9606.ENSP00000265403,9606.ENSP00000266088,9606.ENSP00000285238,9606.ENSP00000303174,9606.ENSP00000304811,9606.ENSP00000304845,9606.ENSP00000305221,9606.ENSP00000320401,9606.ENSP00000334276,9606.ENSP00000337335,9606.ENSP00000341045,9606.ENSP00000343838,9606.ENSP00000346768,9606.ENSP00000361666,9606.ENSP00000362508,9606.ENSP00000362513,9606.ENSP00000362525,…	SULT2A1,UGT2A3,UGT2B10,SLC5A1,ABCC3,UGT1A6,UGT2B7,UGT1A1,UGT2B4,UGT2B17,UGT2B28,SLC22A8,UGT2B15,UGT1A10,UGT1A9,SLC22A7,UGT1A4,UGT1A5,UGT1A7,UGT1A8,UGT2B11,UGT1A3,UGT2A2,ABCB1,ABCC4,ABCC2,ABCG2,CYP3A4
KEGG	hsa00830	Retinol metabolism	26	65	1.83	7.78	7.54e-36	9606.ENSP00000222982,9606.ENSP00000251566,9606.ENSP00000260682,9606.ENSP00000265403,9606.ENSP00000285979,9606.ENSP00000303174,9606.ENSP00000304811,9606.ENSP00000304845,9606.ENSP00000305221,9606.ENSP00000320401,9606.ENSP00000334276,9606.ENSP00000337450,9606.ENSP00000341045,9606.ENSP00000342007,9606.ENSP00000343838,9606.ENSP00000346768,9606.ENSP00000360317,9606.ENSP00000362508,9606.ENSP00000362513,…	CYP3A5,UGT2A3,CYP2C9,UGT2B10,CYP2C18,UGT1A6,UGT2B7,UGT1A1,UGT2B4,UGT2B17,UGT2B28,CYP3A7,UGT2B15,CYP1A2,UGT1A10,UGT1A9,CYP2C8,UGT1A4,UGT1A5,UGT1A7,UGT1A8,CYP1A1,UGT2B11,UGT1A3,UGT2A2,CYP3A4
KEGG	hsa00040	Pentose and glucuronate interconversions	19	33	1.99	6.85	2.54e-28	9606.ENSP00000251566,9606.ENSP00000265403,9606.ENSP00000302728,9606.ENSP00000303174,9606.ENSP00000304811,9606.ENSP00000304845,9606.ENSP00000305221,9606.ENSP00000320401,9606.ENSP00000334276,9606.ENSP00000341045,9606.ENSP00000343838,9606.ENSP00000346768,9606.ENSP00000362508,9606.ENSP00000362513,9606.ENSP00000362525,9606.ENSP00000362549,9606.ENSP00000387683,9606.ENSP00000418532,9606.ENSP00000475028	UGT2A3,UGT2B10,GUSB,UGT1A6,UGT2B7,UGT1A1,UGT2B4,UGT2B17,UGT2B28,UGT2B15,UGT1A10,UGT1A9,UGT1A4,UGT1A5,UGT1A7,UGT1A8,UGT2B11,UGT1A3,UGT2A2
KEGG	hsa00053	Ascorbate and aldarate metabolism	18	26	2.07	6.93	6.26e-28	9606.ENSP00000251566,9606.ENSP00000265403,9606.ENSP00000303174,9606.ENSP00000304811,9606.ENSP00000304845,9606.ENSP00000305221,9606.ENSP00000320401,9606.ENSP00000334276,9606.ENSP00000341045,9606.ENSP00000343838,9606.ENSP00000346768,9606.ENSP00000362508,9606.ENSP00000362513,9606.ENSP00000362525,9606.ENSP00000362549,9606.ENSP00000387683,9606.ENSP00000418532,9606.ENSP00000475028	UGT2A3,UGT2B10,UGT1A6,UGT2B7,UGT1A1,UGT2B4,UGT2B17,UGT2B28,UGT2B15,UGT1A10,UGT1A9,UGT1A4,UGT1A5,UGT1A7,UGT1A8,UGT2B11,UGT1A3,UGT2A2
KEGG	hsa00860	Porphyrin and chlorophyll metabolism	19	41	1.9	6.36	5.1e-27	9606.ENSP00000251566,9606.ENSP00000265403,9606.ENSP00000302728,9606.ENSP00000303174,9606.ENSP00000304811,9606.ENSP00000304845,9606.ENSP00000305221,9606.ENSP00000320401,9606.ENSP00000334276,9606.ENSP00000341045,9606.ENSP00000343838,9606.ENSP00000346768,9606.ENSP00000362508,9606.ENSP00000362513,9606.ENSP00000362525,9606.ENSP00000362549,9606.ENSP00000387683,9606.ENSP00000418532,9606.ENSP00000475028	UGT2A3,UGT2B10,GUSB,UGT1A6,UGT2B7,UGT1A1,UGT2B4,UGT2B17,UGT2B28,UGT2B15,UGT1A10,UGT1A9,UGT1A4,UGT1A5,UGT1A7,UGT1A8,UGT2B11,UGT1A3,UGT2A2
KEGG	hsa00983	Drug metabolism - other enzymes	21	74	1.68	5.63	2.81e-26	9606.ENSP00000251566,9606.ENSP00000265403,9606.ENSP00000302728,9606.ENSP00000303174,9606.ENSP00000304811,9606.ENSP00000304845,9606.ENSP00000305221,9606.ENSP00000320401,9606.ENSP00000334276,9606.ENSP00000341045,9606.ENSP00000343838,9606.ENSP00000346768,9606.ENSP00000362508,9606.ENSP00000362513,9606.ENSP00000362525,9606.ENSP00000362549,9606.ENSP00000387683,9606.ENSP00000418532,9606.ENSP00000440689,…	UGT2A3,UGT2B10,GUSB,UGT1A6,UGT2B7,UGT1A1,UGT2B4,UGT2B17,UGT2B28,UGT2B15,UGT1A10,UGT1A9,UGT1A4,UGT1A5,UGT1A7,UGT1A8,UGT2B11,UGT1A3,CYP2E1,UGT2A2,CYP3A4
KEGG	hsa01100	Metabolic pathways	33	1435	0.59	1.13	2.55e-10	9606.ENSP00000222982,9606.ENSP00000251566,9606.ENSP00000260682,9606.ENSP00000264162,9606.ENSP00000265403,9606.ENSP00000285979,9606.ENSP00000302728,9606.ENSP00000303174,9606.ENSP00000304811,9606.ENSP00000304845,9606.ENSP00000305221,9606.ENSP00000311648,9606.ENSP00000320401,9606.ENSP00000334276,9606.ENSP00000337450,9606.ENSP00000341045,9606.ENSP00000342007,9606.ENSP00000343838,9606.ENSP00000346768,…	CYP3A5,UGT2A3,CYP2C9,LCT,UGT2B10,CYP2C18,GUSB,UGT1A6,UGT2B7,UGT1A1,UGT2B4,UGT8,UGT2B17,UGT2B28,CYP3A7,UGT2B15,CYP1A2,UGT1A10,UGT1A9,COMT,CYP2C8,CYP2C19,UGT1A4,UGT1A5,UGT1A7,UGT1A8,CYP1A1,UGT2B11,UGT1A3,CYP2E1,LDHA,UGT2A2,CYP3A4
KEGG	hsa02010	ABC transporters	8	45	1.48	1.93	2.15e-08	9606.ENSP00000285238,9606.ENSP00000333926,9606.ENSP00000359233,9606.ENSP00000382342,9606.ENSP00000478255,9606.ENSP00000494609,9606.ENSP00000497274,9606.ENSP00000498246	ABCC3,ABCC5,ABCD3,ABCC1,ABCB1,ABCC4,ABCC2,ABCG2
KEGG	hsa00591	Linoleic acid metabolism	6	29	1.55	1.55	1.29e-06	9606.ENSP00000260682,9606.ENSP00000342007,9606.ENSP00000360317,9606.ENSP00000360372,9606.ENSP00000440689,9606.ENSP00000498939	CYP2C9,CYP1A2,CYP2C8,CYP2C19,CYP2E1,CYP3A4
KEGG	hsa01523	Antifolate resistance	6	31	1.52	1.52	1.7e-06	9606.ENSP00000285238,9606.ENSP00000333926,9606.ENSP00000382342,9606.ENSP00000494609,9606.ENSP00000497274,9606.ENSP00000498246	ABCC3,ABCC5,ABCC1,ABCC4,ABCC2,ABCG2
KEGG	hsa04066	HIF-1 signaling pathway	6	102	1	0.74	0.00093	9606.ENSP00000228872,9606.ENSP00000351407,9606.ENSP00000363089,9606.ENSP00000437955,9606.ENSP00000445175,9606.ENSP00000451828	CDKN1B,ARNT,TLR4,HIF1A,LDHA,AKT1
KEGG	hsa05230	Central carbon metabolism in cancer	5	68	1.1	0.73	0.0014	9606.ENSP00000323568,9606.ENSP00000437955,9606.ENSP00000445175,9606.ENSP00000451828,9606.ENSP00000463978	SLC2A2,HIF1A,LDHA,AKT1,SLC16A3
KEGG	hsa04973	Carbohydrate digestion and absorption	4	44	1.19	0.65	0.0035	9606.ENSP00000264162,9606.ENSP00000266088,9606.ENSP00000323568,9606.ENSP00000451828	LCT,SLC5A1,SLC2A2,AKT1
KEGG	hsa05144	Malaria	4	46	1.17	0.64	0.0039	9606.ENSP00000225831,9606.ENSP00000260010,9606.ENSP00000363089,9606.ENSP00000498321	CCL2,TLR2,TLR4,MYD88
KEGG	hsa05235	PD-L1 expression and PD-1 checkpoint pathway in cancer	5	87	0.99	0.61	0.0039	9606.ENSP00000260010,9606.ENSP00000363089,9606.ENSP00000437955,9606.ENSP00000451828,9606.ENSP00000498321	TLR2,TLR4,HIF1A,AKT1,MYD88
KEGG	hsa05142	Chagas disease	5	97	0.94	0.57	0.0056	9606.ENSP00000225831,9606.ENSP00000260010,9606.ENSP00000363089,9606.ENSP00000451828,9606.ENSP00000498321	CCL2,TLR2,TLR4,AKT1,MYD88
KEGG	hsa04620	Toll-like receptor signaling pathway	5	100	0.93	0.56	0.0061	9606.ENSP00000260010,9606.ENSP00000363089,9606.ENSP00000451828,9606.ENSP00000496355,9606.ENSP00000498321	TLR2,TLR4,AKT1,TLR5,MYD88
KEGG	hsa05134	Legionellosis	4	55	1.09	0.58	0.0061	9606.ENSP00000260010,9606.ENSP00000363089,9606.ENSP00000496355,9606.ENSP00000498321	TLR2,TLR4,TLR5,MYD88
KEGG	hsa05145	Toxoplasmosis	5	103	0.92	0.55	0.0064	9606.ENSP00000260010,9606.ENSP00000363089,9606.ENSP00000386896,9606.ENSP00000451828,9606.ENSP00000498321	TLR2,TLR4,ITGA6,AKT1,MYD88
KEGG	hsa05321	Inflammatory bowel disease	4	59	1.06	0.56	0.0071	9606.ENSP00000260010,9606.ENSP00000300589,9606.ENSP00000363089,9606.ENSP00000496355	TLR2,NOD2,TLR4,TLR5
KEGG	hsa00590	Arachidonic acid metabolism	4	60	1.05	0.56	0.0073	9606.ENSP00000260682,9606.ENSP00000360317,9606.ENSP00000360372,9606.ENSP00000440689	CYP2C9,CYP2C8,CYP2C19,CYP2E1
KEGG	hsa05162	Measles	5	137	0.79	0.43	0.0193	9606.ENSP00000228872,9606.ENSP00000260010,9606.ENSP00000363089,9606.ENSP00000451828,9606.ENSP00000498321	CDKN1B,TLR2,TLR4,AKT1,MYD88
KEGG	hsa00380	Tryptophan metabolism	3	41	1.09	0.42	0.0271	9606.ENSP00000342007,9606.ENSP00000378488,9606.ENSP00000478561	CYP1A2,CYP1A1,CYP1B1
KEGG	hsa05152	Tuberculosis	5	165	0.71	0.35	0.0392	9606.ENSP00000260010,9606.ENSP00000300589,9606.ENSP00000363089,9606.ENSP00000451828,9606.ENSP00000498321	TLR2,NOD2,TLR4,AKT1,MYD88
KEGG	hsa04726	Serotonergic synapse	4	108	0.8	0.34	0.0494	9606.ENSP00000260682,9606.ENSP00000285979,9606.ENSP00000360317,9606.ENSP00000360372	CYP2C9,CYP2C18,CYP2C8,CYP2C19
Reactome	HSA-211859	Biological oxidations	45	215	1.55	7.94	1.33e-51	9606.ENSP00000201586,9606.ENSP00000209929,9606.ENSP00000222002,9606.ENSP00000222382,9606.ENSP00000222982,9606.ENSP00000226444,9606.ENSP00000235835,9606.ENSP00000242057,9606.ENSP00000251566,9606.ENSP00000260682,9606.ENSP00000265403,9606.ENSP00000272452,9606.ENSP00000285979,9606.ENSP00000303174,9606.ENSP00000304811,9606.ENSP00000304845,9606.ENSP00000305221,9606.ENSP00000308770,9606.ENSP00000319622,…	SULT2B1,FMO2,SULT2A1,CYP3A43,CYP3A5,SULT1E1,AKR7A2,AHR,UGT2A3,CYP2C9,UGT2B10,SULT1C4,CYP2C18,UGT1A6,UGT2B7,UGT1A1,UGT2B4,SULT1B1,SULT1C2,UGT2B17,SULT4A1,UGT2B28,CYP3A7,UGT2B15,CYP1A2,UGT1A10,UGT1A9,FMO1,ARNT,COMT,FMO3,CYP2C8,CYP2C19,UGT1A4,UGT1A5,UGT1A7,UGT1A8,CYP1A1,SULT1A1,SULT1A2,UGT2B11,UGT1A3,CYP2E1,CYP1B1,CYP3A4
Reactome	HSA-9748784	Drug ADME	36	105	1.77	9.12	3.54e-47	9606.ENSP00000222002,9606.ENSP00000226444,9606.ENSP00000251566,9606.ENSP00000260682,9606.ENSP00000265403,9606.ENSP00000272452,9606.ENSP00000285238,9606.ENSP00000303174,9606.ENSP00000304811,9606.ENSP00000304845,9606.ENSP00000305221,9606.ENSP00000320401,9606.ENSP00000333926,9606.ENSP00000334276,9606.ENSP00000337335,9606.ENSP00000341045,9606.ENSP00000343838,9606.ENSP00000346768,9606.ENSP00000360317,…	SULT2A1,SULT1E1,UGT2A3,CYP2C9,UGT2B10,SULT1C4,ABCC3,UGT1A6,UGT2B7,UGT1A1,UGT2B4,UGT2B17,ABCC5,UGT2B28,SLC22A8,UGT2B15,UGT1A10,UGT1A9,CYP2C8,CYP2C19,SLC22A7,UGT1A4,UGT1A5,UGT1A7,UGT1A8,SULT1A1,ABCC1,UGT2B11,UGT1A3,CYP2E1,SLC16A1,ABCB1,ABCC4,ABCC2,ABCG2,CYP3A4
Reactome	HSA-9749641	Aspirin ADME	25	42	2	8.61	1.01e-36	9606.ENSP00000251566,9606.ENSP00000260682,9606.ENSP00000265403,9606.ENSP00000285238,9606.ENSP00000303174,9606.ENSP00000304811,9606.ENSP00000304845,9606.ENSP00000305221,9606.ENSP00000320401,9606.ENSP00000334276,9606.ENSP00000341045,9606.ENSP00000346768,9606.ENSP00000360317,9606.ENSP00000360372,9606.ENSP00000361666,9606.ENSP00000362508,9606.ENSP00000362513,9606.ENSP00000362525,9606.ENSP00000362549,…	UGT2A3,CYP2C9,UGT2B10,ABCC3,UGT1A6,UGT2B7,UGT1A1,UGT2B4,UGT2B17,UGT2B28,UGT2B15,UGT1A9,CYP2C8,CYP2C19,SLC22A7,UGT1A4,UGT1A5,UGT1A7,UGT1A8,UGT2B11,UGT1A3,CYP2E1,SLC16A1,ABCC2,CYP3A4
Reactome	HSA-156580	Phase II - Conjugation of compounds	28	104	1.66	6.67	1.17e-33	9606.ENSP00000201586,9606.ENSP00000222002,9606.ENSP00000226444,9606.ENSP00000251566,9606.ENSP00000265403,9606.ENSP00000272452,9606.ENSP00000303174,9606.ENSP00000304811,9606.ENSP00000304845,9606.ENSP00000305221,9606.ENSP00000308770,9606.ENSP00000319622,9606.ENSP00000320401,9606.ENSP00000332565,9606.ENSP00000334276,9606.ENSP00000341045,9606.ENSP00000342007,9606.ENSP00000343838,9606.ENSP00000346768,…	SULT2B1,SULT2A1,SULT1E1,UGT2A3,UGT2B10,SULT1C4,UGT1A6,UGT2B7,UGT1A1,UGT2B4,SULT1B1,SULT1C2,UGT2B17,SULT4A1,UGT2B28,UGT2B15,CYP1A2,UGT1A10,UGT1A9,COMT,UGT1A4,UGT1A5,UGT1A7,UGT1A8,SULT1A1,SULT1A2,UGT2B11,UGT1A3
Reactome	HSA-1430728	Metabolism	63	2092	0.71	1.89	4.66e-28	9606.ENSP00000201586,9606.ENSP00000209929,9606.ENSP00000222002,9606.ENSP00000222382,9606.ENSP00000222982,9606.ENSP00000226444,9606.ENSP00000235835,9606.ENSP00000242057,9606.ENSP00000251566,9606.ENSP00000260682,9606.ENSP00000265403,9606.ENSP00000272452,9606.ENSP00000285238,9606.ENSP00000285979,9606.ENSP00000302728,9606.ENSP00000303174,9606.ENSP00000304811,9606.ENSP00000304845,9606.ENSP00000305221,…	SULT2B1,FMO2,SULT2A1,CYP3A43,CYP3A5,SULT1E1,AKR7A2,AHR,UGT2A3,CYP2C9,UGT2B10,SULT1C4,ABCC3,CYP2C18,GUSB,UGT1A6,UGT2B7,UGT1A1,UGT2B4,SULT1B1,SLC22A13,UGT8,SULT1C2,UGT2B17,SLC16A8,SLC2A2,SULT4A1,ABCC5,UGT2B28,CYP3A7,UGT2B15,CYP1A2,UGT1A10,KCNJ11,UGT1A9,FMO1,ARNT,COMT,FMO3,CYP2C8,CYP2C19,UGT1A4,UGT1A5,UGT1A7,UGT1A8,PDHA1,CYP1A1,SULT1A1,SULT1A2,ABCC1,UGT2B11,SLC22A5,UGT1A3,CYP2E1,SLC16A1,LDHA,AKT1,SL…
Reactome	HSA-156588	Glucuronidation	17	23	2.1	6.48	9.9e-26	9606.ENSP00000251566,9606.ENSP00000265403,9606.ENSP00000303174,9606.ENSP00000304811,9606.ENSP00000304845,9606.ENSP00000305221,9606.ENSP00000320401,9606.ENSP00000334276,9606.ENSP00000341045,9606.ENSP00000343838,9606.ENSP00000346768,9606.ENSP00000362508,9606.ENSP00000362513,9606.ENSP00000362525,9606.ENSP00000362549,9606.ENSP00000387683,9606.ENSP00000418532	UGT2A3,UGT2B10,UGT1A6,UGT2B7,UGT1A1,UGT2B4,UGT2B17,UGT2B28,UGT2B15,UGT1A10,UGT1A9,UGT1A4,UGT1A5,UGT1A7,UGT1A8,UGT2B11,UGT1A3
Reactome	HSA-5083625	Defective GALNT3 causes HFTC	16	18	2.18	6.45	4.27e-25	9606.ENSP00000302716,9606.ENSP00000365473,9606.ENSP00000368771,9606.ENSP00000381008,9606.ENSP00000406861,9606.ENSP00000407422,9606.ENSP00000414350,9606.ENSP00000417498,9606.ENSP00000431983,9606.ENSP00000436812,9606.ENSP00000441929,9606.ENSP00000484824,9606.ENSP00000485028,9606.ENSP00000485659,9606.ENSP00000494061,9606.ENSP00000495398	MUC17,MUC21,MUC3A,MUC16,MUC6,MUC7,MUC20,MUC4,MUC15,MUC5B,MUC12,MUC1,MUC13,MUC5AC,MUC2,MUC19
Reactome	HSA-5083636	Defective GALNT12 causes CRCS1	16	18	2.18	6.45	4.27e-25	9606.ENSP00000302716,9606.ENSP00000365473,9606.ENSP00000368771,9606.ENSP00000381008,9606.ENSP00000406861,9606.ENSP00000407422,9606.ENSP00000414350,9606.ENSP00000417498,9606.ENSP00000431983,9606.ENSP00000436812,9606.ENSP00000441929,9606.ENSP00000484824,9606.ENSP00000485028,9606.ENSP00000485659,9606.ENSP00000494061,9606.ENSP00000495398	MUC17,MUC21,MUC3A,MUC16,MUC6,MUC7,MUC20,MUC4,MUC15,MUC5B,MUC12,MUC1,MUC13,MUC5AC,MUC2,MUC19
Reactome	HSA-5083632	Defective C1GALT1C1 causes TNPS	16	19	2.16	6.38	6.09e-25	9606.ENSP00000302716,9606.ENSP00000365473,9606.ENSP00000368771,9606.ENSP00000381008,9606.ENSP00000406861,9606.ENSP00000407422,9606.ENSP00000414350,9606.ENSP00000417498,9606.ENSP00000431983,9606.ENSP00000436812,9606.ENSP00000441929,9606.ENSP00000484824,9606.ENSP00000485028,9606.ENSP00000485659,9606.ENSP00000494061,9606.ENSP00000495398	MUC17,MUC21,MUC3A,MUC16,MUC6,MUC7,MUC20,MUC4,MUC15,MUC5B,MUC12,MUC1,MUC13,MUC5AC,MUC2,MUC19
Reactome	HSA-977068	Termination of O-glycan biosynthesis	16	25	2.04	5.89	1.35e-23	9606.ENSP00000302716,9606.ENSP00000365473,9606.ENSP00000368771,9606.ENSP00000381008,9606.ENSP00000406861,9606.ENSP00000407422,9606.ENSP00000414350,9606.ENSP00000417498,9606.ENSP00000431983,9606.ENSP00000436812,9606.ENSP00000441929,9606.ENSP00000484824,9606.ENSP00000485028,9606.ENSP00000485659,9606.ENSP00000494061,9606.ENSP00000495398	MUC17,MUC21,MUC3A,MUC16,MUC6,MUC7,MUC20,MUC4,MUC15,MUC5B,MUC12,MUC1,MUC13,MUC5AC,MUC2,MUC19
Reactome	HSA-9753281	Paracetamol ADME	16	27	2	5.76	3.13e-23	9606.ENSP00000222002,9606.ENSP00000226444,9606.ENSP00000272452,9606.ENSP00000285238,9606.ENSP00000303174,9606.ENSP00000304845,9606.ENSP00000333926,9606.ENSP00000341045,9606.ENSP00000343838,9606.ENSP00000346768,9606.ENSP00000378972,9606.ENSP00000382342,9606.ENSP00000440689,9606.ENSP00000494609,9606.ENSP00000497274,9606.ENSP00000498246	SULT2A1,SULT1E1,SULT1C4,ABCC3,UGT1A6,UGT1A1,ABCC5,UGT2B15,UGT1A10,UGT1A9,SULT1A1,ABCC1,CYP2E1,ABCC4,ABCC2,ABCG2
Reactome	HSA-5621480	Dectin-2 family	16	28	1.99	5.7	4.49e-23	9606.ENSP00000302716,9606.ENSP00000365473,9606.ENSP00000368771,9606.ENSP00000381008,9606.ENSP00000406861,9606.ENSP00000407422,9606.ENSP00000414350,9606.ENSP00000417498,9606.ENSP00000431983,9606.ENSP00000436812,9606.ENSP00000441929,9606.ENSP00000484824,9606.ENSP00000485028,9606.ENSP00000485659,9606.ENSP00000494061,9606.ENSP00000495398	MUC17,MUC21,MUC3A,MUC16,MUC6,MUC7,MUC20,MUC4,MUC15,MUC5B,MUC12,MUC1,MUC13,MUC5AC,MUC2,MUC19
Reactome	HSA-211981	Xenobiotics	13	24	1.96	4.59	2.45e-18	9606.ENSP00000222382,9606.ENSP00000222982,9606.ENSP00000242057,9606.ENSP00000260682,9606.ENSP00000285979,9606.ENSP00000337450,9606.ENSP00000342007,9606.ENSP00000351407,9606.ENSP00000360317,9606.ENSP00000360372,9606.ENSP00000378488,9606.ENSP00000440689,9606.ENSP00000498939	CYP3A43,CYP3A5,AHR,CYP2C9,CYP2C18,CYP3A7,CYP1A2,ARNT,CYP2C8,CYP2C19,CYP1A1,CYP2E1,CYP3A4
Reactome	HSA-5668914	Diseases of metabolism	22	250	1.17	2.85	5.67e-17	9606.ENSP00000264162,9606.ENSP00000302716,9606.ENSP00000302728,9606.ENSP00000304845,9606.ENSP00000356729,9606.ENSP00000362508,9606.ENSP00000365473,9606.ENSP00000368771,9606.ENSP00000381008,9606.ENSP00000406861,9606.ENSP00000407422,9606.ENSP00000414350,9606.ENSP00000417498,9606.ENSP00000431983,9606.ENSP00000436812,9606.ENSP00000441929,9606.ENSP00000478561,9606.ENSP00000484824,9606.ENSP00000485028,…	LCT,MUC17,GUSB,UGT1A1,FMO3,UGT1A4,MUC21,MUC3A,MUC16,MUC6,MUC7,MUC20,MUC4,MUC15,MUC5B,MUC12,CYP1B1,MUC1,MUC13,MUC5AC,MUC2,MUC19
Reactome	HSA-211945	Phase I - Functionalization of compounds	17	105	1.44	3.47	6.85e-17	9606.ENSP00000209929,9606.ENSP00000222382,9606.ENSP00000222982,9606.ENSP00000242057,9606.ENSP00000260682,9606.ENSP00000285979,9606.ENSP00000337450,9606.ENSP00000342007,9606.ENSP00000346901,9606.ENSP00000351407,9606.ENSP00000356729,9606.ENSP00000360317,9606.ENSP00000360372,9606.ENSP00000378488,9606.ENSP00000440689,9606.ENSP00000478561,9606.ENSP00000498939	FMO2,CYP3A43,CYP3A5,AHR,CYP2C9,CYP2C18,CYP3A7,CYP1A2,FMO1,ARNT,FMO3,CYP2C8,CYP2C19,CYP1A1,CYP2E1,CYP1B1,CYP3A4
Reactome	HSA-211897	Cytochrome P450 - arranged by substrate type	14	65	1.56	3.41	2.84e-15	9606.ENSP00000222382,9606.ENSP00000222982,9606.ENSP00000242057,9606.ENSP00000260682,9606.ENSP00000285979,9606.ENSP00000337450,9606.ENSP00000342007,9606.ENSP00000351407,9606.ENSP00000360317,9606.ENSP00000360372,9606.ENSP00000378488,9606.ENSP00000440689,9606.ENSP00000478561,9606.ENSP00000498939	CYP3A43,CYP3A5,AHR,CYP2C9,CYP2C18,CYP3A7,CYP1A2,ARNT,CYP2C8,CYP2C19,CYP1A1,CYP2E1,CYP1B1,CYP3A4
Reactome	HSA-1643685	Disease	39	1702	0.59	1.19	6.09e-12	9606.ENSP00000228872,9606.ENSP00000260010,9606.ENSP00000264162,9606.ENSP00000266088,9606.ENSP00000300589,9606.ENSP00000302716,9606.ENSP00000302728,9606.ENSP00000304845,9606.ENSP00000323568,9606.ENSP00000345708,9606.ENSP00000354511,9606.ENSP00000356729,9606.ENSP00000362508,9606.ENSP00000363089,9606.ENSP00000365473,9606.ENSP00000366797,9606.ENSP00000368771,9606.ENSP00000380252,9606.ENSP00000381008,…	CDKN1B,TLR2,LCT,SLC5A1,NOD2,MUC17,GUSB,UGT1A1,SLC2A2,KCNJ11,COMT,FMO3,UGT1A4,TLR4,MUC21,SLC22A12,MUC3A,NFE2L2,MUC16,SLC22A5,MUC6,MUC7,MUC20,MUC4,PPIA,MUC15,MUC5B,SLC16A1,MUC12,AKT1,CYP1B1,MUC1,MUC13,MUC5AC,MUC2,MUC19,TLR5,ABCC2,MYD88
Reactome	HSA-156584	Cytosolic sulfonation of small molecules	9	23	1.82	2.86	1.46e-11	9606.ENSP00000201586,9606.ENSP00000222002,9606.ENSP00000226444,9606.ENSP00000272452,9606.ENSP00000308770,9606.ENSP00000319622,9606.ENSP00000332565,9606.ENSP00000378972,9606.ENSP00000378992	SULT2B1,SULT2A1,SULT1E1,SULT1C4,SULT1B1,SULT1C2,SULT4A1,SULT1A1,SULT1A2
Reactome	HSA-2142670	Synthesis of epoxy (EET) and dihydroxyeicosatrienoic acids (DHET)	6	8	2.11	2.24	9.71e-09	9606.ENSP00000260682,9606.ENSP00000342007,9606.ENSP00000360317,9606.ENSP00000360372,9606.ENSP00000378488,9606.ENSP00000478561	CYP2C9,CYP1A2,CYP2C8,CYP2C19,CYP1A1,CYP1B1
Reactome	HSA-2142816	Synthesis of (16-20)-hydroxyeicosatetraenoic acids (HETE)	6	9	2.05	2.18	1.55e-08	9606.ENSP00000260682,9606.ENSP00000342007,9606.ENSP00000360317,9606.ENSP00000360372,9606.ENSP00000378488,9606.ENSP00000478561	CYP2C9,CYP1A2,CYP2C8,CYP2C19,CYP1A1,CYP1B1
Reactome	HSA-425366	Transport of bile salts and organic acids, metal ions and amine compounds	10	84	1.31	1.83	1.68e-08	9606.ENSP00000301891,9606.ENSP00000321735,9606.ENSP00000337335,9606.ENSP00000361666,9606.ENSP00000366797,9606.ENSP00000367102,9606.ENSP00000402760,9606.ENSP00000441065,9606.ENSP00000448071,9606.ENSP00000463978	SLC22A11,SLC16A8,SLC22A8,SLC22A7,SLC22A12,SLC22A6,SLC22A5,SLC16A1,SLC16A7,SLC16A3
Reactome	HSA-382551	Transport of small molecules	22	723	0.71	1.17	2.77e-08	9606.ENSP00000266088,9606.ENSP00000285238,9606.ENSP00000301891,9606.ENSP00000321735,9606.ENSP00000323568,9606.ENSP00000333926,9606.ENSP00000337335,9606.ENSP00000345708,9606.ENSP00000359233,9606.ENSP00000361666,9606.ENSP00000366797,9606.ENSP00000367102,9606.ENSP00000382342,9606.ENSP00000402760,9606.ENSP00000441065,9606.ENSP00000448071,9606.ENSP00000463978,9606.ENSP00000465734,9606.ENSP00000478255,…	SLC5A1,ABCC3,SLC22A11,SLC16A8,SLC2A2,ABCC5,SLC22A8,KCNJ11,ABCD3,SLC22A7,SLC22A12,SLC22A6,ABCC1,SLC22A5,SLC16A1,SLC16A7,SLC16A3,SLC16A2,ABCB1,ABCC4,ABCC2,ABCG2
Reactome	HSA-561048	Organic anion transport	5	5	2.23	1.95	1.27e-07	9606.ENSP00000301891,9606.ENSP00000337335,9606.ENSP00000361666,9606.ENSP00000366797,9606.ENSP00000367102	SLC22A11,SLC22A8,SLC22A7,SLC22A12,SLC22A6
Reactome	HSA-549132	Organic cation/anion/zwitterion transport	6	15	1.83	1.88	1.4e-07	9606.ENSP00000301891,9606.ENSP00000337335,9606.ENSP00000361666,9606.ENSP00000366797,9606.ENSP00000367102,9606.ENSP00000402760	SLC22A11,SLC22A8,SLC22A7,SLC22A12,SLC22A6,SLC22A5
Reactome	HSA-9027307	Biosynthesis of maresin-like SPMs	5	6	2.15	1.88	2.15e-07	9606.ENSP00000260682,9606.ENSP00000342007,9606.ENSP00000360317,9606.ENSP00000440689,9606.ENSP00000498939	CYP2C9,CYP1A2,CYP2C8,CYP2E1,CYP3A4
Reactome	HSA-9018677	Biosynthesis of DHA-derived SPMs	6	17	1.78	1.8	2.42e-07	9606.ENSP00000260682,9606.ENSP00000342007,9606.ENSP00000360317,9606.ENSP00000378488,9606.ENSP00000440689,9606.ENSP00000498939	CYP2C9,CYP1A2,CYP2C8,CYP1A1,CYP2E1,CYP3A4
Reactome	HSA-425407	SLC-mediated transmembrane transport	13	247	0.95	1.32	2.99e-07	9606.ENSP00000266088,9606.ENSP00000301891,9606.ENSP00000321735,9606.ENSP00000323568,9606.ENSP00000337335,9606.ENSP00000361666,9606.ENSP00000366797,9606.ENSP00000367102,9606.ENSP00000402760,9606.ENSP00000441065,9606.ENSP00000448071,9606.ENSP00000463978,9606.ENSP00000465734	SLC5A1,SLC22A11,SLC16A8,SLC2A2,SLC22A8,SLC22A7,SLC22A12,SLC22A6,SLC22A5,SLC16A1,SLC16A7,SLC16A3,SLC16A2
Reactome	HSA-9757110	Prednisone ADME	5	10	1.93	1.65	1.18e-06	9606.ENSP00000304811,9606.ENSP00000320401,9606.ENSP00000418532,9606.ENSP00000478255,9606.ENSP00000498939	UGT2B7,UGT2B17,UGT1A3,ABCB1,CYP3A4
Reactome	HSA-168249	Innate Immune System	23	1041	0.57	0.85	2.91e-06	9606.ENSP00000260010,9606.ENSP00000300589,9606.ENSP00000302716,9606.ENSP00000302728,9606.ENSP00000363089,9606.ENSP00000365473,9606.ENSP00000368771,9606.ENSP00000381008,9606.ENSP00000406861,9606.ENSP00000407422,9606.ENSP00000414350,9606.ENSP00000417498,9606.ENSP00000419425,9606.ENSP00000431983,9606.ENSP00000436812,9606.ENSP00000441929,9606.ENSP00000484824,9606.ENSP00000485028,9606.ENSP00000485659,…	TLR2,NOD2,MUC17,GUSB,TLR4,MUC21,MUC3A,MUC16,MUC6,MUC7,MUC20,MUC4,PPIA,MUC15,MUC5B,MUC12,MUC1,MUC13,MUC5AC,MUC2,MUC19,TLR5,MYD88
Reactome	HSA-70268	Pyruvate metabolism	6	30	1.53	1.44	3.68e-06	9606.ENSP00000321735,9606.ENSP00000369134,9606.ENSP00000441065,9606.ENSP00000445175,9606.ENSP00000463978,9606.ENSP00000498864	SLC16A8,PDHA1,SLC16A1,LDHA,SLC16A3,PDK3
Reactome	HSA-189483	Heme degradation	5	15	1.75	1.45	5.47e-06	9606.ENSP00000304845,9606.ENSP00000362508,9606.ENSP00000382342,9606.ENSP00000497274,9606.ENSP00000498246	UGT1A1,UGT1A4,ABCC1,ABCC2,ABCG2
Reactome	HSA-2142753	Arachidonic acid metabolism	7	58	1.31	1.31	6.04e-06	9606.ENSP00000260682,9606.ENSP00000342007,9606.ENSP00000360317,9606.ENSP00000360372,9606.ENSP00000378488,9606.ENSP00000382342,9606.ENSP00000478561	CYP2C9,CYP1A2,CYP2C8,CYP2C19,CYP1A1,ABCC1,CYP1B1
Reactome	HSA-433692	Proton-coupled monocarboxylate transport	4	6	2.05	1.38	1.3e-05	9606.ENSP00000321735,9606.ENSP00000441065,9606.ENSP00000448071,9606.ENSP00000463978	SLC16A8,SLC16A1,SLC16A7,SLC16A3
Reactome	HSA-382556	ABC-family proteins mediated transport	8	102	1.12	1.15	1.5e-05	9606.ENSP00000285238,9606.ENSP00000333926,9606.ENSP00000345708,9606.ENSP00000359233,9606.ENSP00000382342,9606.ENSP00000478255,9606.ENSP00000494609,9606.ENSP00000497274	ABCC3,ABCC5,KCNJ11,ABCD3,ABCC1,ABCB1,ABCC4,ABCC2
Reactome	HSA-9754706	Atorvastatin ADME	4	9	1.88	1.23	4.16e-05	9606.ENSP00000418532,9606.ENSP00000478255,9606.ENSP00000497274,9606.ENSP00000498939	UGT1A3,ABCB1,ABCC2,CYP3A4
Reactome	HSA-210991	Basigin interactions	5	25	1.53	1.18	4.24e-05	9606.ENSP00000321735,9606.ENSP00000386896,9606.ENSP00000419425,9606.ENSP00000441065,9606.ENSP00000463978	SLC16A8,ITGA6,PPIA,SLC16A1,SLC16A3
Reactome	HSA-211999	CYP2E1 reactions	4	11	1.79	1.16	7.19e-05	9606.ENSP00000260682,9606.ENSP00000360317,9606.ENSP00000360372,9606.ENSP00000440689	CYP2C9,CYP2C8,CYP2C19,CYP2E1
Reactome	HSA-217271	FMO oxidises nucleophiles	3	3	2.23	1.07	0.00019	9606.ENSP00000209929,9606.ENSP00000346901,9606.ENSP00000356729	FMO2,FMO1,FMO3
Reactome	HSA-5423646	Aflatoxin activation and detoxification	4	18	1.58	0.95	0.00036	9606.ENSP00000222982,9606.ENSP00000235835,9606.ENSP00000342007,9606.ENSP00000498939	CYP3A5,AKR7A2,CYP1A2,CYP3A4
Reactome	HSA-556833	Metabolism of lipids	16	739	0.57	0.64	0.00039	9606.ENSP00000222002,9606.ENSP00000242057,9606.ENSP00000260682,9606.ENSP00000285238,9606.ENSP00000311648,9606.ENSP00000342007,9606.ENSP00000346768,9606.ENSP00000351407,9606.ENSP00000360317,9606.ENSP00000360372,9606.ENSP00000378488,9606.ENSP00000382342,9606.ENSP00000402760,9606.ENSP00000440689,9606.ENSP00000478561,9606.ENSP00000498939	SULT2A1,AHR,CYP2C9,ABCC3,UGT8,CYP1A2,UGT1A9,ARNT,CYP2C8,CYP2C19,CYP1A1,ABCC1,SLC22A5,CYP2E1,CYP1B1,CYP3A4
Reactome	HSA-8978868	Fatty acid metabolism	8	176	0.89	0.75	0.00059	9606.ENSP00000260682,9606.ENSP00000342007,9606.ENSP00000360317,9606.ENSP00000360372,9606.ENSP00000378488,9606.ENSP00000382342,9606.ENSP00000402760,9606.ENSP00000478561	CYP2C9,CYP1A2,CYP2C8,CYP2C19,CYP1A1,ABCC1,SLC22A5,CYP1B1
Reactome	HSA-168256	Immune System	27	1979	0.36	0.48	0.0013	9606.ENSP00000225831,9606.ENSP00000228872,9606.ENSP00000260010,9606.ENSP00000300589,9606.ENSP00000302716,9606.ENSP00000302728,9606.ENSP00000363089,9606.ENSP00000365473,9606.ENSP00000368771,9606.ENSP00000381008,9606.ENSP00000406861,9606.ENSP00000407422,9606.ENSP00000414350,9606.ENSP00000417498,9606.ENSP00000419425,9606.ENSP00000431983,9606.ENSP00000436812,9606.ENSP00000437955,9606.ENSP00000441929,…	CCL2,CDKN1B,TLR2,NOD2,MUC17,GUSB,TLR4,MUC21,MUC3A,MUC16,MUC6,MUC7,MUC20,MUC4,PPIA,MUC15,MUC5B,HIF1A,MUC12,AKT1,MUC1,MUC13,MUC5AC,MUC2,MUC19,TLR5,MYD88
Reactome	HSA-5602358	Diseases associated with the TLR signaling cascade	4	31	1.34	0.72	0.0022	9606.ENSP00000260010,9606.ENSP00000363089,9606.ENSP00000496355,9606.ENSP00000498321	TLR2,TLR4,TLR5,MYD88
Reactome	HSA-5579029	Metabolic disorders of biological oxidation enzymes	4	34	1.3	0.68	0.003	9606.ENSP00000304845,9606.ENSP00000356729,9606.ENSP00000362508,9606.ENSP00000478561	UGT1A1,FMO3,UGT1A4,CYP1B1
Reactome	HSA-5619115	Disorders of transmembrane transporters	7	176	0.83	0.57	0.0042	9606.ENSP00000266088,9606.ENSP00000323568,9606.ENSP00000345708,9606.ENSP00000366797,9606.ENSP00000402760,9606.ENSP00000441065,9606.ENSP00000497274	SLC5A1,SLC2A2,KCNJ11,SLC22A12,SLC22A5,SLC16A1,ABCC2
Reactome	HSA-5602680	MyD88 deficiency (TLR5)	2	2	2.23	0.6	0.0082	9606.ENSP00000496355,9606.ENSP00000498321	TLR5,MYD88
Reactome	HSA-5602498	MyD88 deficiency (TLR2/4)	3	17	1.48	0.58	0.0083	9606.ENSP00000260010,9606.ENSP00000363089,9606.ENSP00000498321	TLR2,TLR4,MYD88
Reactome	HSA-5603041	IRAK4 deficiency (TLR2/4)	3	18	1.45	0.56	0.0095	9606.ENSP00000260010,9606.ENSP00000363089,9606.ENSP00000498321	TLR2,TLR4,MYD88
Reactome	HSA-5619102	SLC transporter disorders	5	99	0.93	0.48	0.0141	9606.ENSP00000266088,9606.ENSP00000323568,9606.ENSP00000366797,9606.ENSP00000402760,9606.ENSP00000441065	SLC5A1,SLC2A2,SLC22A12,SLC22A5,SLC16A1
Reactome	HSA-5603037	IRAK4 deficiency (TLR5)	2	4	1.93	0.49	0.0191	9606.ENSP00000496355,9606.ENSP00000498321	TLR5,MYD88
Reactome	HSA-8963743	Digestion and absorption	3	24	1.33	0.48	0.0191	9606.ENSP00000264162,9606.ENSP00000266088,9606.ENSP00000323568	LCT,SLC5A1,SLC2A2
Reactome	HSA-8981373	Intestinal hexose absorption	2	4	1.93	0.49	0.0191	9606.ENSP00000266088,9606.ENSP00000323568	SLC5A1,SLC2A2
Reactome	HSA-9018681	Biosynthesis of protectins	2	4	1.93	0.49	0.0191	9606.ENSP00000342007,9606.ENSP00000378488	CYP1A2,CYP1A1
Reactome	HSA-597592	Post-translational protein modification	19	1405	0.36	0.34	0.0212	9606.ENSP00000300589,9606.ENSP00000302716,9606.ENSP00000365473,9606.ENSP00000368771,9606.ENSP00000380252,9606.ENSP00000381008,9606.ENSP00000406861,9606.ENSP00000407422,9606.ENSP00000414350,9606.ENSP00000417498,9606.ENSP00000431983,9606.ENSP00000436812,9606.ENSP00000437955,9606.ENSP00000441929,9606.ENSP00000484824,9606.ENSP00000485028,9606.ENSP00000485659,9606.ENSP00000494061,9606.ENSP00000495398	NOD2,MUC17,MUC21,MUC3A,NFE2L2,MUC16,MUC6,MUC7,MUC20,MUC4,MUC15,MUC5B,HIF1A,MUC12,MUC1,MUC13,MUC5AC,MUC2,MUC19
Reactome	HSA-211976	Endogenous sterols	3	27	1.28	0.44	0.0246	9606.ENSP00000242057,9606.ENSP00000351407,9606.ENSP00000478561	AHR,ARNT,CYP1B1
Reactome	HSA-2161517	Abacavir transmembrane transport	2	5	1.83	0.46	0.0246	9606.ENSP00000478255,9606.ENSP00000498246	ABCB1,ABCG2
Reactome	HSA-9793528	Ciprofloxacin ADME	2	5	1.83	0.46	0.0246	9606.ENSP00000337335,9606.ENSP00000498246	SLC22A8,ABCG2
Reactome	HSA-1989781	PPARA activates gene expression	5	117	0.86	0.41	0.0247	9606.ENSP00000222002,9606.ENSP00000242057,9606.ENSP00000346768,9606.ENSP00000351407,9606.ENSP00000378488	SULT2A1,AHR,UGT1A9,ARNT,CYP1A1
Reactome	HSA-8937144	Aryl hydrocarbon receptor signalling	2	7	1.69	0.41	0.0378	9606.ENSP00000242057,9606.ENSP00000351407	AHR,ARNT
WikiPathways	WP702	Metapathway biotransformation Phase I and II	44	180	1.62	8.68	2.14e-53	9606.ENSP00000201586,9606.ENSP00000209929,9606.ENSP00000222002,9606.ENSP00000222382,9606.ENSP00000222982,9606.ENSP00000226444,9606.ENSP00000235835,9606.ENSP00000251566,9606.ENSP00000254090,9606.ENSP00000260682,9606.ENSP00000272452,9606.ENSP00000285979,9606.ENSP00000303174,9606.ENSP00000304811,9606.ENSP00000304845,9606.ENSP00000305221,9606.ENSP00000308770,9606.ENSP00000319622,9606.ENSP00000320401,…	SULT2B1,FMO2,SULT2A1,CYP3A43,CYP3A5,SULT1E1,AKR7A2,UGT2A3,FMO5,CYP2C9,SULT1C4,CYP2C18,UGT1A6,UGT2B7,UGT1A1,UGT2B4,SULT1B1,SULT1C2,UGT2B17,SULT4A1,UGT2B28,CYP3A7,UGT2B15,CYP1A2,UGT1A10,UGT1A9,FMO1,COMT,FMO4,FMO3,CYP2C8,CYP2C19,UGT1A4,UGT1A5,UGT1A7,CYP1A1,SULT1A1,SULT1A2,UGT2B11,UGT1A3,CYP2E1,UGT2A2,CYP1B1,CYP3A4
WikiPathways	WP691	Tamoxifen metabolism	19	21	2.19	7.66	3.76e-30	9606.ENSP00000222002,9606.ENSP00000222982,9606.ENSP00000226444,9606.ENSP00000260682,9606.ENSP00000304811,9606.ENSP00000341045,9606.ENSP00000342007,9606.ENSP00000343838,9606.ENSP00000346901,9606.ENSP00000356729,9606.ENSP00000360317,9606.ENSP00000360372,9606.ENSP00000362508,9606.ENSP00000362549,9606.ENSP00000378488,9606.ENSP00000378972,9606.ENSP00000440689,9606.ENSP00000478561,9606.ENSP00000498939	SULT2A1,CYP3A5,SULT1E1,CYP2C9,UGT2B7,UGT2B15,CYP1A2,UGT1A10,FMO1,FMO3,CYP2C8,CYP2C19,UGT1A4,UGT1A8,CYP1A1,SULT1A1,CYP2E1,CYP1B1,CYP3A4
WikiPathways	WP698	Glucuronidation	18	25	2.09	6.84	2.3e-27	9606.ENSP00000251566,9606.ENSP00000265403,9606.ENSP00000303174,9606.ENSP00000304811,9606.ENSP00000304845,9606.ENSP00000305221,9606.ENSP00000320401,9606.ENSP00000334276,9606.ENSP00000341045,9606.ENSP00000343838,9606.ENSP00000346768,9606.ENSP00000362508,9606.ENSP00000362513,9606.ENSP00000362525,9606.ENSP00000362549,9606.ENSP00000387683,9606.ENSP00000418532,9606.ENSP00000475028	UGT2A3,UGT2B10,UGT1A6,UGT2B7,UGT1A1,UGT2B4,UGT2B17,UGT2B28,UGT2B15,UGT1A10,UGT1A9,UGT1A4,UGT1A5,UGT1A7,UGT1A8,UGT2B11,UGT1A3,UGT2A2
WikiPathways	WP2882	Nuclear receptors meta-pathway	29	312	1.2	3.54	1.92e-23	9606.ENSP00000222002,9606.ENSP00000222982,9606.ENSP00000225831,9606.ENSP00000228872,9606.ENSP00000242057,9606.ENSP00000260682,9606.ENSP00000266088,9606.ENSP00000285238,9606.ENSP00000303174,9606.ENSP00000304811,9606.ENSP00000304845,9606.ENSP00000305221,9606.ENSP00000323568,9606.ENSP00000333926,9606.ENSP00000337450,9606.ENSP00000342007,9606.ENSP00000346768,9606.ENSP00000351407,9606.ENSP00000360372,…	SULT2A1,CYP3A5,CCL2,CDKN1B,AHR,CYP2C9,SLC5A1,ABCC3,UGT1A6,UGT2B7,UGT1A1,UGT2B4,SLC2A2,ABCC5,CYP3A7,CYP1A2,UGT1A9,ARNT,CYP2C19,UGT1A4,UGT1A7,CYP1A1,SULT1A1,NFE2L2,ABCB1,CYP1B1,ABCC4,ABCC2,CYP3A4
WikiPathways	WP5276	Estrogen metabolism	14	24	2	5.06	3.32e-20	9606.ENSP00000222982,9606.ENSP00000226444,9606.ENSP00000260682,9606.ENSP00000304811,9606.ENSP00000337450,9606.ENSP00000342007,9606.ENSP00000343838,9606.ENSP00000354511,9606.ENSP00000360317,9606.ENSP00000360372,9606.ENSP00000362549,9606.ENSP00000475028,9606.ENSP00000478561,9606.ENSP00000498939	CYP3A5,SULT1E1,CYP2C9,UGT2B7,CYP3A7,CYP1A2,UGT1A10,COMT,CYP2C8,CYP2C19,UGT1A8,UGT2A2,CYP1B1,CYP3A4
WikiPathways	WP2876	Pregnane X receptor pathway	14	32	1.87	4.6	6.6e-19	9606.ENSP00000222002,9606.ENSP00000222982,9606.ENSP00000260682,9606.ENSP00000285238,9606.ENSP00000303174,9606.ENSP00000304845,9606.ENSP00000337450,9606.ENSP00000346768,9606.ENSP00000360372,9606.ENSP00000362508,9606.ENSP00000478255,9606.ENSP00000494609,9606.ENSP00000497274,9606.ENSP00000498939	SULT2A1,CYP3A5,CYP2C9,ABCC3,UGT1A6,UGT1A1,CYP3A7,UGT1A9,CYP2C19,UGT1A4,ABCB1,ABCC4,ABCC2,CYP3A4
WikiPathways	WP1604	Codeine and morphine metabolism	12	14	2.16	4.87	9.08e-19	9606.ENSP00000285238,9606.ENSP00000303174,9606.ENSP00000304811,9606.ENSP00000304845,9606.ENSP00000305221,9606.ENSP00000343838,9606.ENSP00000346768,9606.ENSP00000360317,9606.ENSP00000362549,9606.ENSP00000478255,9606.ENSP00000497274,9606.ENSP00000498939	ABCC3,UGT1A6,UGT2B7,UGT1A1,UGT2B4,UGT1A10,UGT1A9,CYP2C8,UGT1A8,ABCB1,ABCC2,CYP3A4
WikiPathways	WP697	Estrogen metabolism	12	18	2.05	4.56	6.98e-18	9606.ENSP00000226444,9606.ENSP00000303174,9606.ENSP00000304811,9606.ENSP00000304845,9606.ENSP00000342007,9606.ENSP00000346768,9606.ENSP00000354511,9606.ENSP00000378488,9606.ENSP00000378972,9606.ENSP00000418532,9606.ENSP00000478561,9606.ENSP00000498939	SULT1E1,UGT1A6,UGT2B7,UGT1A1,CYP1A2,UGT1A9,COMT,CYP1A1,SULT1A1,UGT1A3,CYP1B1,CYP3A4
WikiPathways	WP2875	Constitutive androstane receptor pathway	13	31	1.85	4.26	1.84e-17	9606.ENSP00000222002,9606.ENSP00000222982,9606.ENSP00000260682,9606.ENSP00000285238,9606.ENSP00000303174,9606.ENSP00000304845,9606.ENSP00000346768,9606.ENSP00000360372,9606.ENSP00000362508,9606.ENSP00000378972,9606.ENSP00000478255,9606.ENSP00000497274,9606.ENSP00000498939	SULT2A1,CYP3A5,CYP2C9,ABCC3,UGT1A6,UGT1A1,UGT1A9,CYP2C19,UGT1A4,SULT1A1,ABCB1,ABCC2,CYP3A4
WikiPathways	WP2873	Aryl hydrocarbon receptor pathway	12	45	1.66	3.3	4e-14	9606.ENSP00000228872,9606.ENSP00000242057,9606.ENSP00000303174,9606.ENSP00000304845,9606.ENSP00000342007,9606.ENSP00000346768,9606.ENSP00000351407,9606.ENSP00000362508,9606.ENSP00000362525,9606.ENSP00000378488,9606.ENSP00000380252,9606.ENSP00000478561	CDKN1B,AHR,UGT1A6,UGT1A1,CYP1A2,UGT1A9,ARNT,UGT1A4,UGT1A7,CYP1A1,NFE2L2,CYP1B1
WikiPathways	WP692	Sulfation biotransformation reaction	9	16	1.98	3.26	7.9e-13	9606.ENSP00000201586,9606.ENSP00000222002,9606.ENSP00000226444,9606.ENSP00000272452,9606.ENSP00000308770,9606.ENSP00000319622,9606.ENSP00000332565,9606.ENSP00000378972,9606.ENSP00000378992	SULT2B1,SULT2A1,SULT1E1,SULT1C4,SULT1B1,SULT1C2,SULT4A1,SULT1A1,SULT1A2
WikiPathways	WP43	Oxidation by cytochrome P450	12	61	1.52	2.88	8.03e-13	9606.ENSP00000222382,9606.ENSP00000222982,9606.ENSP00000260682,9606.ENSP00000285979,9606.ENSP00000337450,9606.ENSP00000342007,9606.ENSP00000360317,9606.ENSP00000360372,9606.ENSP00000378488,9606.ENSP00000440689,9606.ENSP00000478561,9606.ENSP00000498939	CYP3A43,CYP3A5,CYP2C9,CYP2C18,CYP3A7,CYP1A2,CYP2C8,CYP2C19,CYP1A1,CYP2E1,CYP1B1,CYP3A4
WikiPathways	WP229	Irinotecan pathway	8	12	2.05	3.05	7.71e-12	9606.ENSP00000222982,9606.ENSP00000304845,9606.ENSP00000343838,9606.ENSP00000346768,9606.ENSP00000382342,9606.ENSP00000497274,9606.ENSP00000498246,9606.ENSP00000498939	CYP3A5,UGT1A1,UGT1A10,UGT1A9,ABCC1,ABCC2,ABCG2,CYP3A4
WikiPathways	WP2884	NRF2 pathway	13	140	1.2	2.02	3.21e-10	9606.ENSP00000266088,9606.ENSP00000285238,9606.ENSP00000303174,9606.ENSP00000304811,9606.ENSP00000304845,9606.ENSP00000323568,9606.ENSP00000333926,9606.ENSP00000346768,9606.ENSP00000362508,9606.ENSP00000362525,9606.ENSP00000380252,9606.ENSP00000494609,9606.ENSP00000497274	SLC5A1,ABCC3,UGT1A6,UGT2B7,UGT1A1,SLC2A2,ABCC5,UGT1A9,UGT1A4,UGT1A7,NFE2L2,ABCC4,ABCC2
WikiPathways	WP4917	Proximal tubule transport	10	57	1.47	2.31	3.21e-10	9606.ENSP00000266088,9606.ENSP00000301891,9606.ENSP00000323568,9606.ENSP00000337335,9606.ENSP00000361666,9606.ENSP00000367102,9606.ENSP00000478255,9606.ENSP00000494609,9606.ENSP00000497274,9606.ENSP00000498246	SLC5A1,SLC22A11,SLC2A2,SLC22A8,SLC22A7,SLC22A6,ABCB1,ABCC4,ABCC2,ABCG2
WikiPathways	WP299	Nuclear receptors in lipid metabolism and toxicity	8	32	1.63	2.19	3.47e-09	9606.ENSP00000260682,9606.ENSP00000285238,9606.ENSP00000342007,9606.ENSP00000359233,9606.ENSP00000440689,9606.ENSP00000478255,9606.ENSP00000497274,9606.ENSP00000498939	CYP2C9,ABCC3,CYP1A2,ABCD3,CYP2E1,ABCB1,ABCC2,CYP3A4
WikiPathways	WP688	Catalytic cycle of mammalian flavin-containing monooxygenases (FMOs)	5	5	2.23	2.02	7.13e-08	9606.ENSP00000209929,9606.ENSP00000254090,9606.ENSP00000346901,9606.ENSP00000356723,9606.ENSP00000356729	FMO2,FMO5,FMO1,FMO4,FMO3
WikiPathways	WP2289	Drug induction of bile acid pathway	6	16	1.8	1.9	1.06e-07	9606.ENSP00000222002,9606.ENSP00000285238,9606.ENSP00000478255,9606.ENSP00000494609,9606.ENSP00000497274,9606.ENSP00000498939	SULT2A1,ABCC3,ABCB1,ABCC4,ABCC2,CYP3A4
WikiPathways	WP694	Arylamine metabolism	5	6	2.15	1.96	1.16e-07	9606.ENSP00000342007,9606.ENSP00000346768,9606.ENSP00000362508,9606.ENSP00000378972,9606.ENSP00000378992	CYP1A2,UGT1A9,UGT1A4,SULT1A1,SULT1A2
WikiPathways	WP2586	Aryl hydrocarbon receptor pathway	7	45	1.42	1.55	8.25e-07	9606.ENSP00000228872,9606.ENSP00000242057,9606.ENSP00000342007,9606.ENSP00000351407,9606.ENSP00000378488,9606.ENSP00000380252,9606.ENSP00000478561	CDKN1B,AHR,CYP1A2,ARNT,CYP1A1,NFE2L2,CYP1B1
WikiPathways	WP3612	Photodynamic therapy-induced NFE2L2 (NRF2) survival signaling	5	23	1.57	1.26	2.07e-05	9606.ENSP00000285238,9606.ENSP00000380252,9606.ENSP00000494609,9606.ENSP00000497274,9606.ENSP00000498246	ABCC3,NFE2L2,ABCC4,ABCC2,ABCG2
WikiPathways	WP3869	Cannabinoid receptor signaling	5	28	1.48	1.16	4.66e-05	9606.ENSP00000242057,9606.ENSP00000260682,9606.ENSP00000360372,9606.ENSP00000378488,9606.ENSP00000498939	AHR,CYP2C9,CYP2C19,CYP1A1,CYP3A4
WikiPathways	WP2877	Vitamin D receptor pathway	9	183	0.92	0.93	6.53e-05	9606.ENSP00000222002,9606.ENSP00000222982,9606.ENSP00000228872,9606.ENSP00000260682,9606.ENSP00000319622,9606.ENSP00000378488,9606.ENSP00000437955,9606.ENSP00000478255,9606.ENSP00000498939	SULT2A1,CYP3A5,CDKN1B,CYP2C9,SULT1C2,CYP1A1,HIF1A,ABCB1,CYP3A4
WikiPathways	WP5314	Lactate shuttle in glial cells	4	12	1.75	1.16	6.53e-05	9606.ENSP00000441065,9606.ENSP00000445175,9606.ENSP00000448071,9606.ENSP00000463978	SLC16A1,LDHA,SLC16A7,SLC16A3
WikiPathways	WP1601	Fluoropyrimidine activity	5	33	1.41	1.08	8.47e-05	9606.ENSP00000285238,9606.ENSP00000333926,9606.ENSP00000361666,9606.ENSP00000494609,9606.ENSP00000498246	ABCC3,ABCC5,SLC22A7,ABCC4,ABCG2
WikiPathways	WP5055	Burn wound healing	7	100	1.08	0.97	9.49e-05	9606.ENSP00000225831,9606.ENSP00000260010,9606.ENSP00000300589,9606.ENSP00000363089,9606.ENSP00000451828,9606.ENSP00000496355,9606.ENSP00000498321	CCL2,TLR2,NOD2,TLR4,AKT1,TLR5,MYD88
WikiPathways	WP3298	Melatonin metabolism and effects	5	35	1.38	1.06	0.0001	9606.ENSP00000342007,9606.ENSP00000360372,9606.ENSP00000378488,9606.ENSP00000378972,9606.ENSP00000478561	CYP1A2,CYP2C19,CYP1A1,SULT1A1,CYP1B1
WikiPathways	WP206	Fatty acid omega-oxidation	4	15	1.66	1.09	0.00011	9606.ENSP00000342007,9606.ENSP00000378488,9606.ENSP00000440689,9606.ENSP00000498939	CYP1A2,CYP1A1,CYP2E1,CYP3A4
WikiPathways	WP3614	Photodynamic therapy-induced HIF-1 survival signaling	5	36	1.37	1.04	0.00011	9606.ENSP00000351407,9606.ENSP00000369134,9606.ENSP00000437955,9606.ENSP00000441065,9606.ENSP00000445175	ARNT,PDHA1,HIF1A,SLC16A1,LDHA
WikiPathways	WP2491	Diclofenac metabolic pathway	3	4	2.11	1.07	0.00018	9606.ENSP00000285979,9606.ENSP00000360317,9606.ENSP00000360372	CYP2C18,CYP2C8,CYP2C19
WikiPathways	WP3877	MYD88 distinct input-output pathway	4	18	1.58	1.02	0.00019	9606.ENSP00000260010,9606.ENSP00000363089,9606.ENSP00000496355,9606.ENSP00000498321	TLR2,TLR4,TLR5,MYD88
WikiPathways	WP4206	Hereditary leiomyomatosis and renal cell carcinoma pathway	4	19	1.55	1	0.00022	9606.ENSP00000369134,9606.ENSP00000380252,9606.ENSP00000437955,9606.ENSP00000445175	PDHA1,NFE2L2,HIF1A,LDHA
WikiPathways	WP1600	Nicotine metabolism in liver cells	3	6	1.93	0.97	0.00038	9606.ENSP00000346768,9606.ENSP00000356729,9606.ENSP00000362508	UGT1A9,FMO3,UGT1A4
WikiPathways	WP5224	2q37 copy number variation syndrome	7	135	0.94	0.79	0.00047	9606.ENSP00000303174,9606.ENSP00000304845,9606.ENSP00000343838,9606.ENSP00000346768,9606.ENSP00000362508,9606.ENSP00000362525,9606.ENSP00000362549	UGT1A6,UGT1A1,UGT1A10,UGT1A9,UGT1A4,UGT1A7,UGT1A8
WikiPathways	WP699	Aflatoxin B1 metabolism	3	7	1.86	0.93	0.00051	9606.ENSP00000235835,9606.ENSP00000342007,9606.ENSP00000498939	AKR7A2,CYP1A2,CYP3A4
WikiPathways	WP696	Benzo(a)pyrene metabolism	3	9	1.75	0.86	0.0009	9606.ENSP00000378488,9606.ENSP00000478561,9606.ENSP00000498939	CYP1A1,CYP1B1,CYP3A4
WikiPathways	WP3858	Toll-like receptor signaling related to MyD88	4	31	1.34	0.79	0.0011	9606.ENSP00000260010,9606.ENSP00000363089,9606.ENSP00000496355,9606.ENSP00000498321	TLR2,TLR4,TLR5,MYD88
WikiPathways	WP2881	Estrogen receptor pathway	3	13	1.59	0.75	0.0021	9606.ENSP00000342007,9606.ENSP00000378488,9606.ENSP00000478561	CYP1A2,CYP1A1,CYP1B1
WikiPathways	WP5220	Metabolic reprogramming in pancreatic cancer	4	41	1.22	0.68	0.0028	9606.ENSP00000358794,9606.ENSP00000369134,9606.ENSP00000441065,9606.ENSP00000445175	SLC16A4,PDHA1,SLC16A1,LDHA
WikiPathways	WP4136	Fibrin complement receptor 3 signaling pathway	4	43	1.2	0.66	0.0032	9606.ENSP00000225831,9606.ENSP00000363089,9606.ENSP00000451828,9606.ENSP00000498321	CCL2,TLR4,AKT1,MYD88
WikiPathways	WP5198	Inflammatory bowel disease signaling	4	43	1.2	0.66	0.0032	9606.ENSP00000260010,9606.ENSP00000300589,9606.ENSP00000363089,9606.ENSP00000496355	TLR2,NOD2,TLR4,TLR5
WikiPathways	WP2646	Lidocaine metabolism	2	2	2.23	0.7	0.0038	9606.ENSP00000342007,9606.ENSP00000498939	CYP1A2,CYP3A4
WikiPathways	WP2816	Felbamate metabolism	2	2	2.23	0.7	0.0038	9606.ENSP00000440689,9606.ENSP00000498939	CYP2E1,CYP3A4
WikiPathways	WP4174	Metabolism of tetrahydrocannabinol (THC)	2	2	2.23	0.7	0.0038	9606.ENSP00000260682,9606.ENSP00000498939	CYP2C9,CYP3A4
WikiPathways	WP4462	Platelet-mediated interactions with vascular and circulating cells	3	17	1.48	0.67	0.0038	9606.ENSP00000225831,9606.ENSP00000260010,9606.ENSP00000363089	CCL2,TLR2,TLR4
WikiPathways	WP2879	Farnesoid X receptor pathway	3	19	1.43	0.64	0.0047	9606.ENSP00000222002,9606.ENSP00000305221,9606.ENSP00000498939	SULT2A1,UGT2B4,CYP3A4
WikiPathways	WP4478	LTF danger signal response pathway	3	19	1.43	0.64	0.0047	9606.ENSP00000260010,9606.ENSP00000363089,9606.ENSP00000498321	TLR2,TLR4,MYD88
WikiPathways	WP5238	Cholestasis	3	19	1.43	0.64	0.0047	9606.ENSP00000285238,9606.ENSP00000494609,9606.ENSP00000497274	ABCC3,ABCC4,ABCC2
WikiPathways	WP3640	Imatinib and chronic myeloid leukemia	3	20	1.41	0.63	0.0051	9606.ENSP00000228872,9606.ENSP00000478255,9606.ENSP00000498246	CDKN1B,ABCB1,ABCG2
WikiPathways	WP4141	PI3K/AKT/mTOR - vitamin D3 signaling	3	21	1.38	0.62	0.0056	9606.ENSP00000369134,9606.ENSP00000445175,9606.ENSP00000451828	PDHA1,LDHA,AKT1
WikiPathways	WP5066	FOXA2 pathway	3	21	1.38	0.62	0.0056	9606.ENSP00000285238,9606.ENSP00000494609,9606.ENSP00000497274	ABCC3,ABCC4,ABCC2
WikiPathways	WP75	Toll-like receptor signaling pathway	5	102	0.92	0.55	0.0063	9606.ENSP00000260010,9606.ENSP00000363089,9606.ENSP00000451828,9606.ENSP00000496355,9606.ENSP00000498321	TLR2,TLR4,AKT1,TLR5,MYD88
WikiPathways	WP1539	Angiogenesis	3	23	1.35	0.59	0.0068	9606.ENSP00000351407,9606.ENSP00000437955,9606.ENSP00000451828	ARNT,HIF1A,AKT1
WikiPathways	WP2865	IL1 and megakaryocytes in obesity	3	24	1.33	0.58	0.0075	9606.ENSP00000225831,9606.ENSP00000260010,9606.ENSP00000498321	CCL2,TLR2,MYD88
WikiPathways	WP5272	LDL- influence on CD14 and TLR4	3	24	1.33	0.58	0.0075	9606.ENSP00000225831,9606.ENSP00000363089,9606.ENSP00000451828	CCL2,TLR4,AKT1
WikiPathways	WP2374	Oncostatin M signaling pathway	4	64	1.03	0.53	0.0095	9606.ENSP00000225831,9606.ENSP00000228872,9606.ENSP00000437955,9606.ENSP00000451828	CCL2,CDKN1B,HIF1A,AKT1
WikiPathways	WP2542	Sulindac metabolic pathway	2	5	1.83	0.58	0.0096	9606.ENSP00000342007,9606.ENSP00000478561	CYP1A2,CYP1B1
WikiPathways	WP3672	lncRNA-mediated mechanisms of therapeutic resistance	2	6	1.75	0.54	0.0125	9606.ENSP00000437955,9606.ENSP00000478255	HIF1A,ABCB1
WikiPathways	WP408	Oxidative stress response	3	30	1.23	0.52	0.0125	9606.ENSP00000303174,9606.ENSP00000378488,9606.ENSP00000380252	UGT1A6,CYP1A1,NFE2L2
WikiPathways	WP4868	Type I interferon induction and signaling during SARS-CoV-2 infection	3	31	1.22	0.51	0.0133	9606.ENSP00000260010,9606.ENSP00000363089,9606.ENSP00000498321	TLR2,TLR4,MYD88
WikiPathways	WP4341	Non-genomic actions of 1,25 dihydroxyvitamin D3	4	74	0.96	0.48	0.0146	9606.ENSP00000225831,9606.ENSP00000260010,9606.ENSP00000300589,9606.ENSP00000363089	CCL2,TLR2,NOD2,TLR4
WikiPathways	WP678	Arachidonate epoxygenase / epoxide hydrolase	2	7	1.69	0.52	0.015	9606.ENSP00000260682,9606.ENSP00000360317	CYP2C9,CYP2C8
WikiPathways	WP2456	HIF1A and PPARG regulation of glycolysis	2	8	1.63	0.49	0.0184	9606.ENSP00000437955,9606.ENSP00000445175	HIF1A,LDHA
WikiPathways	WP3926	ApoE and miR-146 in inflammation and atherosclerosis	2	8	1.63	0.49	0.0184	9606.ENSP00000260010,9606.ENSP00000363089	TLR2,TLR4
WikiPathways	WP5211	Glucose metabolism in triple-negative breast cancer cells	2	8	1.63	0.49	0.0184	9606.ENSP00000441065,9606.ENSP00000445175	SLC16A1,LDHA
WikiPathways	WP4018	Clear cell renal cell carcinoma pathways	4	82	0.92	0.44	0.0194	9606.ENSP00000351407,9606.ENSP00000437955,9606.ENSP00000445175,9606.ENSP00000451828	ARNT,HIF1A,LDHA,AKT1
WikiPathways	WP4269	Ethanol metabolism production of ROS by CYP2E1	2	9	1.58	0.47	0.021	9606.ENSP00000380252,9606.ENSP00000440689	NFE2L2,CYP2E1
WikiPathways	WP4298	Acute viral myocarditis	4	85	0.9	0.43	0.021	9606.ENSP00000300589,9606.ENSP00000363089,9606.ENSP00000451828,9606.ENSP00000496355	NOD2,TLR4,AKT1,TLR5
WikiPathways	WP4673	Male infertility	5	144	0.77	0.42	0.021	9606.ENSP00000242057,9606.ENSP00000378488,9606.ENSP00000380252,9606.ENSP00000448071,9606.ENSP00000478255	AHR,CYP1A1,NFE2L2,SLC16A7,ABCB1
WikiPathways	WP4720	Eicosanoid metabolism via cytochrome P450 monooxygenases pathway	2	9	1.58	0.47	0.021	9606.ENSP00000285979,9606.ENSP00000360317	CYP2C18,CYP2C8
WikiPathways	WP4290	Metabolic reprogramming in colon cancer	3	42	1.08	0.43	0.0255	9606.ENSP00000369134,9606.ENSP00000445175,9606.ENSP00000463978	PDHA1,LDHA,SLC16A3
WikiPathways	WP534	Glycolysis and gluconeogenesis	3	43	1.07	0.42	0.0268	9606.ENSP00000323568,9606.ENSP00000369134,9606.ENSP00000445175	SLC2A2,PDHA1,LDHA
WikiPathways	WP716	Vitamin A and carotenoid metabolism	3	43	1.07	0.42	0.0268	9606.ENSP00000201586,9606.ENSP00000378972,9606.ENSP00000440689	SULT2B1,SULT1A1,CYP2E1
WikiPathways	WP5173	Disorders of galactose metabolism	2	13	1.42	0.41	0.0358	9606.ENSP00000266088,9606.ENSP00000323568	SLC5A1,SLC2A2
WikiPathways	WP5178	Disorders of fructose metabolism	2	14	1.38	0.39	0.0402	9606.ENSP00000266088,9606.ENSP00000323568	SLC5A1,SLC2A2
WikiPathways	WP5192	Modulation of PI3K-Akt-mTOR signaling by bioactive sphingolipids	2	14	1.38	0.39	0.0402	9606.ENSP00000437955,9606.ENSP00000451828	HIF1A,AKT1
WikiPathways	WP5279	Mineralocorticoid biosynthesis	2	14	1.38	0.39	0.0402	9606.ENSP00000304811,9606.ENSP00000343838	UGT2B7,UGT1A10
WikiPathways	WP2813	Mammary gland development pathway - Embryonic development (Stage 1 of 4)	2	15	1.35	0.38	0.0437	9606.ENSP00000386896,9606.ENSP00000451828	ITGA6,AKT1
WikiPathways	WP5329	Cholesterol biosynthesis pathway in hepatocytes	4	111	0.79	0.34	0.0463	9606.ENSP00000337450,9606.ENSP00000359233,9606.ENSP00000378488,9606.ENSP00000498939	CYP3A7,ABCD3,CYP1A1,CYP3A4
WikiPathways	WP195	IL-1 signaling pathway	3	55	0.97	0.36	0.0466	9606.ENSP00000225831,9606.ENSP00000451828,9606.ENSP00000498321	CCL2,AKT1,MYD88
Monarch	EFO:0005653	Serum metabolite measurement	22	287	1.11	2.37	7.53e-14	9606.ENSP00000222002,9606.ENSP00000222382,9606.ENSP00000260682,9606.ENSP00000285979,9606.ENSP00000303174,9606.ENSP00000304845,9606.ENSP00000341045,9606.ENSP00000343838,9606.ENSP00000346768,9606.ENSP00000354511,9606.ENSP00000360317,9606.ENSP00000362508,9606.ENSP00000362513,9606.ENSP00000362525,9606.ENSP00000362549,9606.ENSP00000382342,9606.ENSP00000402760,9606.ENSP00000418532,9606.ENSP00000445175,…	SULT2A1,CYP3A43,CYP2C9,CYP2C18,UGT1A6,UGT1A1,UGT2B15,UGT1A10,UGT1A9,COMT,CYP2C8,UGT1A4,UGT1A5,UGT1A7,UGT1A8,ABCC1,SLC22A5,UGT1A3,LDHA,ABCC4,ABCC2,ABCG2
Monarch	EFO:0005664	Blood metabolite measurement	19	181	1.25	2.64	7.53e-14	9606.ENSP00000222002,9606.ENSP00000222982,9606.ENSP00000242057,9606.ENSP00000260682,9606.ENSP00000303174,9606.ENSP00000304845,9606.ENSP00000343838,9606.ENSP00000346768,9606.ENSP00000354511,9606.ENSP00000356729,9606.ENSP00000360317,9606.ENSP00000362508,9606.ENSP00000362513,9606.ENSP00000362525,9606.ENSP00000362549,9606.ENSP00000382342,9606.ENSP00000402760,9606.ENSP00000418532,9606.ENSP00000494609	SULT2A1,CYP3A5,AHR,CYP2C9,UGT1A6,UGT1A1,UGT1A10,UGT1A9,COMT,FMO3,CYP2C8,UGT1A4,UGT1A5,UGT1A7,UGT1A8,ABCC1,SLC22A5,UGT1A3,ABCC4
Monarch	EFO:0004739	Circulating cell free DNA measurement	9	9	2.23	3.33	1.11e-12	9606.ENSP00000303174,9606.ENSP00000304845,9606.ENSP00000343838,9606.ENSP00000346768,9606.ENSP00000362508,9606.ENSP00000362513,9606.ENSP00000362525,9606.ENSP00000362549,9606.ENSP00000418532	UGT1A6,UGT1A1,UGT1A10,UGT1A9,UGT1A4,UGT1A5,UGT1A7,UGT1A8,UGT1A3
Monarch	EFO:0004725	Metabolite measurement	33	1033	0.73	1.47	2.86e-12	9606.ENSP00000222002,9606.ENSP00000222382,9606.ENSP00000222982,9606.ENSP00000235835,9606.ENSP00000242057,9606.ENSP00000260682,9606.ENSP00000285979,9606.ENSP00000303174,9606.ENSP00000304811,9606.ENSP00000304845,9606.ENSP00000341045,9606.ENSP00000343838,9606.ENSP00000346768,9606.ENSP00000354511,9606.ENSP00000356729,9606.ENSP00000360317,9606.ENSP00000360372,9606.ENSP00000361666,9606.ENSP00000362508,…	SULT2A1,CYP3A43,CYP3A5,AKR7A2,AHR,CYP2C9,CYP2C18,UGT1A6,UGT2B7,UGT1A1,UGT2B15,UGT1A10,UGT1A9,COMT,FMO3,CYP2C8,CYP2C19,SLC22A7,UGT1A4,UGT1A5,UGT1A7,UGT1A8,NFE2L2,ABCC1,SLC22A5,MUC4,UGT1A3,PPIA,LDHA,MUC1,ABCC4,ABCC2,ABCG2
Monarch	EFO:0010551	Xanthurenate measurement	9	11	2.14	3.19	2.86e-12	9606.ENSP00000303174,9606.ENSP00000304845,9606.ENSP00000343838,9606.ENSP00000346768,9606.ENSP00000362508,9606.ENSP00000362513,9606.ENSP00000362525,9606.ENSP00000362549,9606.ENSP00000418532	UGT1A6,UGT1A1,UGT1A10,UGT1A9,UGT1A4,UGT1A5,UGT1A7,UGT1A8,UGT1A3
Monarch	EFO:0009279	Response to tenofovir	10	58	1.47	1.96	1.42e-08	9606.ENSP00000296420,9606.ENSP00000303174,9606.ENSP00000304845,9606.ENSP00000343838,9606.ENSP00000346768,9606.ENSP00000362508,9606.ENSP00000362513,9606.ENSP00000362525,9606.ENSP00000362549,9606.ENSP00000418532	EMCN,UGT1A6,UGT1A1,UGT1A10,UGT1A9,UGT1A4,UGT1A5,UGT1A7,UGT1A8,UGT1A3
Monarch	EFO:0003762	Vitamin D deficiency	7	16	1.87	1.95	7.76e-08	9606.ENSP00000222002,9606.ENSP00000303174,9606.ENSP00000343838,9606.ENSP00000346768,9606.ENSP00000362513,9606.ENSP00000362525,9606.ENSP00000362549	SULT2A1,UGT1A6,UGT1A10,UGT1A9,UGT1A5,UGT1A7,UGT1A8
Monarch	EFO:0010468	Carboxylic acid measurement	10	75	1.35	1.72	9.36e-08	9606.ENSP00000303174,9606.ENSP00000304845,9606.ENSP00000343838,9606.ENSP00000346768,9606.ENSP00000362508,9606.ENSP00000362513,9606.ENSP00000362525,9606.ENSP00000362549,9606.ENSP00000418532,9606.ENSP00000494609	UGT1A6,UGT1A1,UGT1A10,UGT1A9,UGT1A4,UGT1A5,UGT1A7,UGT1A8,UGT1A3,ABCC4
Monarch	EFO:0007800	Body fat percentage	10	87	1.29	1.57	3.19e-07	9606.ENSP00000303174,9606.ENSP00000304845,9606.ENSP00000343838,9606.ENSP00000346768,9606.ENSP00000362508,9606.ENSP00000362513,9606.ENSP00000362525,9606.ENSP00000362549,9606.ENSP00000378972,9606.ENSP00000418532	UGT1A6,UGT1A1,UGT1A10,UGT1A9,UGT1A4,UGT1A5,UGT1A7,UGT1A8,SULT1A1,UGT1A3
Monarch	EFO:0004729	Vitamin measurement	13	201	1.04	1.37	4.33e-07	9606.ENSP00000209929,9606.ENSP00000222002,9606.ENSP00000251566,9606.ENSP00000303174,9606.ENSP00000304811,9606.ENSP00000343838,9606.ENSP00000346768,9606.ENSP00000351407,9606.ENSP00000362508,9606.ENSP00000362513,9606.ENSP00000362525,9606.ENSP00000362549,9606.ENSP00000451828	FMO2,SULT2A1,UGT2A3,UGT1A6,UGT2B7,UGT1A10,UGT1A9,ARNT,UGT1A4,UGT1A5,UGT1A7,UGT1A8,AKT1
Monarch	EFO:0004570	Bilirubin measurement	11	139	1.13	1.35	1.31e-06	9606.ENSP00000265403,9606.ENSP00000303174,9606.ENSP00000304845,9606.ENSP00000343838,9606.ENSP00000346768,9606.ENSP00000362508,9606.ENSP00000362513,9606.ENSP00000362525,9606.ENSP00000362549,9606.ENSP00000418532,9606.ENSP00000497274	UGT2B10,UGT1A6,UGT1A1,UGT1A10,UGT1A9,UGT1A4,UGT1A5,UGT1A7,UGT1A8,UGT1A3,ABCC2
Monarch	EFO:0004908	Testosterone measurement	17	465	0.79	1.05	2.89e-06	9606.ENSP00000301891,9606.ENSP00000303174,9606.ENSP00000304811,9606.ENSP00000327569,9606.ENSP00000343838,9606.ENSP00000346768,9606.ENSP00000351407,9606.ENSP00000356729,9606.ENSP00000360317,9606.ENSP00000362508,9606.ENSP00000362513,9606.ENSP00000362525,9606.ENSP00000362549,9606.ENSP00000380252,9606.ENSP00000387683,9606.ENSP00000425497,9606.ENSP00000475028	SLC22A11,UGT1A6,UGT2B7,SLC22A10,UGT1A10,UGT1A9,ARNT,FMO3,CYP2C8,UGT1A4,UGT1A5,UGT1A7,UGT1A8,NFE2L2,UGT2B11,UGT2A1,UGT2A2
Monarch	EFO:0004631	Vitamin D measurement	11	159	1.07	1.22	4.21e-06	9606.ENSP00000222002,9606.ENSP00000251566,9606.ENSP00000303174,9606.ENSP00000304811,9606.ENSP00000343838,9606.ENSP00000346768,9606.ENSP00000351407,9606.ENSP00000362508,9606.ENSP00000362513,9606.ENSP00000362525,9606.ENSP00000362549	SULT2A1,UGT2A3,UGT1A6,UGT2B7,UGT1A10,UGT1A9,ARNT,UGT1A4,UGT1A5,UGT1A7,UGT1A8
Monarch	HP:0001939	Abnormality of metabolism/homeostasis	35	2168	0.44	0.68	1.64e-05	9606.ENSP00000201586,9606.ENSP00000222002,9606.ENSP00000228872,9606.ENSP00000242057,9606.ENSP00000260682,9606.ENSP00000264162,9606.ENSP00000266088,9606.ENSP00000300589,9606.ENSP00000302728,9606.ENSP00000303174,9606.ENSP00000304845,9606.ENSP00000323568,9606.ENSP00000342007,9606.ENSP00000343838,9606.ENSP00000345708,9606.ENSP00000346768,9606.ENSP00000354511,9606.ENSP00000356729,9606.ENSP00000362513,…	SULT2B1,SULT2A1,CDKN1B,AHR,CYP2C9,LCT,SLC5A1,NOD2,GUSB,UGT1A6,UGT1A1,SLC2A2,CYP1A2,UGT1A10,KCNJ11,UGT1A9,COMT,FMO3,UGT1A5,UGT1A7,UGT1A8,SLC22A12,PDHA1,NFE2L2,ITGA6,SLC22A5,SLC16A1,LDHA,AKT1,SLC16A3,MUC1,ABCC2,MYD88,PDK3,CYP3A4
Monarch	HP:0100508	Abnormality of vitamin metabolism	8	87	1.19	1.05	6.56e-05	9606.ENSP00000222002,9606.ENSP00000303174,9606.ENSP00000343838,9606.ENSP00000346768,9606.ENSP00000362513,9606.ENSP00000362525,9606.ENSP00000362549,9606.ENSP00000498939	SULT2A1,UGT1A6,UGT1A10,UGT1A9,UGT1A5,UGT1A7,UGT1A8,CYP3A4
Monarch	EFO:0011008	Sex hormone measurement	21	944	0.58	0.7	0.00012	9606.ENSP00000222002,9606.ENSP00000226444,9606.ENSP00000242057,9606.ENSP00000301891,9606.ENSP00000303174,9606.ENSP00000304811,9606.ENSP00000327569,9606.ENSP00000341045,9606.ENSP00000343838,9606.ENSP00000346768,9606.ENSP00000351407,9606.ENSP00000356729,9606.ENSP00000360317,9606.ENSP00000362508,9606.ENSP00000362513,9606.ENSP00000362525,9606.ENSP00000362549,9606.ENSP00000380252,9606.ENSP00000387683,…	SULT2A1,SULT1E1,AHR,SLC22A11,UGT1A6,UGT2B7,SLC22A10,UGT2B15,UGT1A10,UGT1A9,ARNT,FMO3,CYP2C8,UGT1A4,UGT1A5,UGT1A7,UGT1A8,NFE2L2,UGT2B11,UGT2A1,UGT2A2
Monarch	EFO:0004730	Hormone measurement	26	1527	0.46	0.57	0.00052	9606.ENSP00000222002,9606.ENSP00000222382,9606.ENSP00000226444,9606.ENSP00000242057,9606.ENSP00000260128,9606.ENSP00000266088,9606.ENSP00000279178,9606.ENSP00000301891,9606.ENSP00000303174,9606.ENSP00000304811,9606.ENSP00000323568,9606.ENSP00000327569,9606.ENSP00000341045,9606.ENSP00000343838,9606.ENSP00000346768,9606.ENSP00000351407,9606.ENSP00000356729,9606.ENSP00000360317,9606.ENSP00000362508,…	SULT2A1,CYP3A43,SULT1E1,AHR,SULF1,SLC5A1,SLC22A9,SLC22A11,UGT1A6,UGT2B7,SLC2A2,SLC22A10,UGT2B15,UGT1A10,UGT1A9,ARNT,FMO3,CYP2C8,UGT1A4,UGT1A5,UGT1A7,UGT1A8,NFE2L2,UGT2B11,UGT2A1,UGT2A2
Monarch	EFO:0004611	Low density lipoprotein cholesterol measurement	15	624	0.61	0.53	0.003	9606.ENSP00000242057,9606.ENSP00000303174,9606.ENSP00000304811,9606.ENSP00000304845,9606.ENSP00000343838,9606.ENSP00000346768,9606.ENSP00000353007,9606.ENSP00000354511,9606.ENSP00000362508,9606.ENSP00000362513,9606.ENSP00000362525,9606.ENSP00000362549,9606.ENSP00000402760,9606.ENSP00000418532,9606.ENSP00000498246	AHR,UGT1A6,UGT2B7,UGT1A1,UGT1A10,UGT1A9,SULF2,COMT,UGT1A4,UGT1A5,UGT1A7,UGT1A8,SLC22A5,UGT1A3,ABCG2
Monarch	EFO:0005105	Lipid or lipoprotein measurement	33	2526	0.35	0.42	0.004	9606.ENSP00000222002,9606.ENSP00000222382,9606.ENSP00000242057,9606.ENSP00000251566,9606.ENSP00000301891,9606.ENSP00000302716,9606.ENSP00000303174,9606.ENSP00000304811,9606.ENSP00000304845,9606.ENSP00000323568,9606.ENSP00000327569,9606.ENSP00000341045,9606.ENSP00000343838,9606.ENSP00000346768,9606.ENSP00000351407,9606.ENSP00000353007,9606.ENSP00000354511,9606.ENSP00000356729,9606.ENSP00000360317,…	SULT2A1,CYP3A43,AHR,UGT2A3,SLC22A11,MUC17,UGT1A6,UGT2B7,UGT1A1,SLC2A2,SLC22A10,UGT2B15,UGT1A10,UGT1A9,ARNT,SULF2,COMT,FMO3,CYP2C8,UGT1A4,UGT1A5,UGT1A7,UGT1A8,TLR4,NFE2L2,UGT2B11,SLC22A5,UGT1A3,UGT2A1,LDHA,AKT1,UGT2A2,ABCG2
Monarch	EFO:0004529	Lipid measurement	31	2400	0.34	0.38	0.01	9606.ENSP00000222002,9606.ENSP00000222382,9606.ENSP00000242057,9606.ENSP00000251566,9606.ENSP00000301891,9606.ENSP00000303174,9606.ENSP00000304811,9606.ENSP00000304845,9606.ENSP00000323568,9606.ENSP00000327569,9606.ENSP00000341045,9606.ENSP00000343838,9606.ENSP00000346768,9606.ENSP00000351407,9606.ENSP00000353007,9606.ENSP00000354511,9606.ENSP00000356729,9606.ENSP00000360317,9606.ENSP00000362508,…	SULT2A1,CYP3A43,AHR,UGT2A3,SLC22A11,UGT1A6,UGT2B7,UGT1A1,SLC2A2,SLC22A10,UGT2B15,UGT1A10,UGT1A9,ARNT,SULF2,COMT,FMO3,CYP2C8,UGT1A4,UGT1A5,UGT1A7,UGT1A8,TLR4,NFE2L2,UGT2B11,SLC22A5,UGT1A3,UGT2A1,AKT1,UGT2A2,ABCG2
Monarch	EFO:0005127	Cancer biomarker measurement	10	365	0.67	0.35	0.0382	9606.ENSP00000303174,9606.ENSP00000304845,9606.ENSP00000343838,9606.ENSP00000346768,9606.ENSP00000362508,9606.ENSP00000362513,9606.ENSP00000362525,9606.ENSP00000362549,9606.ENSP00000381008,9606.ENSP00000418532	UGT1A6,UGT1A1,UGT1A10,UGT1A9,UGT1A4,UGT1A5,UGT1A7,UGT1A8,MUC16,UGT1A3
Monarch	EFO:0004732	Lipoprotein measurement	21	1426	0.4	0.29	0.0467	9606.ENSP00000222002,9606.ENSP00000242057,9606.ENSP00000302716,9606.ENSP00000303174,9606.ENSP00000304811,9606.ENSP00000304845,9606.ENSP00000341045,9606.ENSP00000343838,9606.ENSP00000346768,9606.ENSP00000353007,9606.ENSP00000354511,9606.ENSP00000362508,9606.ENSP00000362513,9606.ENSP00000362525,9606.ENSP00000362549,9606.ENSP00000380252,9606.ENSP00000402760,9606.ENSP00000418532,9606.ENSP00000445175,…	SULT2A1,AHR,MUC17,UGT1A6,UGT2B7,UGT1A1,UGT2B15,UGT1A10,UGT1A9,SULF2,COMT,UGT1A4,UGT1A5,UGT1A7,UGT1A8,NFE2L2,SLC22A5,UGT1A3,LDHA,AKT1,ABCG2
DISEASES	DOID:2741	Bilirubin metabolic disorder	10	13	2.12	3.51	1.57e-13	9606.ENSP00000285238,9606.ENSP00000303174,9606.ENSP00000304845,9606.ENSP00000343838,9606.ENSP00000346768,9606.ENSP00000362508,9606.ENSP00000362525,9606.ENSP00000362549,9606.ENSP00000418532,9606.ENSP00000497274	ABCC3,UGT1A6,UGT1A1,UGT1A10,UGT1A9,UGT1A4,UGT1A7,UGT1A8,UGT1A3,ABCC2
DISEASES	DOID:2739	Gilbert syndrome	7	8	2.17	2.4	2.79e-09	9606.ENSP00000303174,9606.ENSP00000304845,9606.ENSP00000343838,9606.ENSP00000346768,9606.ENSP00000362508,9606.ENSP00000362525,9606.ENSP00000362549	UGT1A6,UGT1A1,UGT1A10,UGT1A9,UGT1A4,UGT1A7,UGT1A8
DISEASES	DOID:0014667	Disease of metabolism	28	1076	0.65	1.07	4.47e-08	9606.ENSP00000260682,9606.ENSP00000264162,9606.ENSP00000285238,9606.ENSP00000301891,9606.ENSP00000302728,9606.ENSP00000303174,9606.ENSP00000304845,9606.ENSP00000323568,9606.ENSP00000332565,9606.ENSP00000343838,9606.ENSP00000345708,9606.ENSP00000346768,9606.ENSP00000356729,9606.ENSP00000359233,9606.ENSP00000362508,9606.ENSP00000362525,9606.ENSP00000362549,9606.ENSP00000366797,9606.ENSP00000369134,…	CYP2C9,LCT,ABCC3,SLC22A11,GUSB,UGT1A6,UGT1A1,SLC2A2,SULT4A1,UGT1A10,KCNJ11,UGT1A9,FMO3,ABCD3,UGT1A4,UGT1A7,UGT1A8,SLC22A12,PDHA1,SLC22A5,UGT1A3,SLC16A1,LDHA,AKT1,ABCB1,ABCC2,ABCG2,MYD88
DISEASES	DOID:2382	Kernicterus	6	6	2.23	2.08	4.47e-08	9606.ENSP00000303174,9606.ENSP00000304845,9606.ENSP00000343838,9606.ENSP00000362508,9606.ENSP00000362525,9606.ENSP00000362549	UGT1A6,UGT1A1,UGT1A10,UGT1A4,UGT1A7,UGT1A8
DISEASES	DOID:3803	Crigler-Najjar syndrome	6	6	2.23	2.08	4.47e-08	9606.ENSP00000303174,9606.ENSP00000304845,9606.ENSP00000343838,9606.ENSP00000362508,9606.ENSP00000362525,9606.ENSP00000362549	UGT1A6,UGT1A1,UGT1A10,UGT1A4,UGT1A7,UGT1A8
DISEASES	DOID:2383	Neonatal jaundice	6	7	2.16	2.07	4.49e-08	9606.ENSP00000303174,9606.ENSP00000304845,9606.ENSP00000343838,9606.ENSP00000362508,9606.ENSP00000362525,9606.ENSP00000362549	UGT1A6,UGT1A1,UGT1A10,UGT1A4,UGT1A7,UGT1A8
DISEASES	DOID:10211	Cholelithiasis	6	8	2.11	2.01	6.7e-08	9606.ENSP00000303174,9606.ENSP00000304845,9606.ENSP00000343838,9606.ENSP00000362508,9606.ENSP00000362525,9606.ENSP00000362549	UGT1A6,UGT1A1,UGT1A10,UGT1A4,UGT1A7,UGT1A8
DISEASES	DOID:0060262	Gallbladder disease	7	22	1.73	1.84	1.58e-07	9606.ENSP00000303174,9606.ENSP00000304845,9606.ENSP00000343838,9606.ENSP00000362508,9606.ENSP00000362525,9606.ENSP00000362549,9606.ENSP00000478255	UGT1A6,UGT1A1,UGT1A10,UGT1A4,UGT1A7,UGT1A8,ABCB1
DISEASES	DOID:655	Inherited metabolic disorder	25	949	0.65	1.03	1.64e-07	9606.ENSP00000260682,9606.ENSP00000264162,9606.ENSP00000285238,9606.ENSP00000302728,9606.ENSP00000303174,9606.ENSP00000304845,9606.ENSP00000323568,9606.ENSP00000332565,9606.ENSP00000343838,9606.ENSP00000345708,9606.ENSP00000346768,9606.ENSP00000356729,9606.ENSP00000359233,9606.ENSP00000362508,9606.ENSP00000362525,9606.ENSP00000362549,9606.ENSP00000369134,9606.ENSP00000402760,9606.ENSP00000418532,…	CYP2C9,LCT,ABCC3,GUSB,UGT1A6,UGT1A1,SLC2A2,SULT4A1,UGT1A10,KCNJ11,UGT1A9,FMO3,ABCD3,UGT1A4,UGT1A7,UGT1A8,PDHA1,SLC22A5,UGT1A3,SLC16A1,LDHA,AKT1,ABCB1,ABCC2,MYD88
DISEASES	DOID:77	Gastrointestinal system disease	17	576	0.7	0.86	2.7e-05	9606.ENSP00000225831,9606.ENSP00000266088,9606.ENSP00000300589,9606.ENSP00000303174,9606.ENSP00000304845,9606.ENSP00000343838,9606.ENSP00000362508,9606.ENSP00000362525,9606.ENSP00000362549,9606.ENSP00000363089,9606.ENSP00000402760,9606.ENSP00000406861,9606.ENSP00000417498,9606.ENSP00000440689,9606.ENSP00000451828,9606.ENSP00000478255,9606.ENSP00000494061	CCL2,SLC5A1,NOD2,UGT1A6,UGT1A1,UGT1A10,UGT1A4,UGT1A7,UGT1A8,TLR4,SLC22A5,MUC6,MUC4,CYP2E1,AKT1,ABCB1,MUC2
DISEASES	DOID:8778	Crohns disease	4	24	1.45	0.59	0.0078	9606.ENSP00000225831,9606.ENSP00000300589,9606.ENSP00000402760,9606.ENSP00000494061	CCL2,NOD2,SLC22A5,MUC2
DISEASES	DOID:1920	Hyperuricemia	3	7	1.86	0.6	0.008	9606.ENSP00000301891,9606.ENSP00000366797,9606.ENSP00000498246	SLC22A11,SLC22A12,ABCG2
DISEASES	DOID:0050589	Inflammatory bowel disease	5	58	1.17	0.53	0.0111	9606.ENSP00000225831,9606.ENSP00000300589,9606.ENSP00000402760,9606.ENSP00000478255,9606.ENSP00000494061	CCL2,NOD2,SLC22A5,ABCB1,MUC2
DISEASES	DOID:13189	Gout	3	13	1.59	0.43	0.0317	9606.ENSP00000301891,9606.ENSP00000366797,9606.ENSP00000498246	SLC22A11,SLC22A12,ABCG2
TISSUES	BTO:0001491	Viscus	84	5378	0.42	1.05	2.52e-20	9606.ENSP00000222002,9606.ENSP00000222382,9606.ENSP00000222982,9606.ENSP00000225831,9606.ENSP00000226444,9606.ENSP00000228872,9606.ENSP00000235835,9606.ENSP00000242057,9606.ENSP00000251566,9606.ENSP00000254090,9606.ENSP00000260682,9606.ENSP00000265403,9606.ENSP00000266088,9606.ENSP00000279178,9606.ENSP00000285238,9606.ENSP00000285979,9606.ENSP00000300589,9606.ENSP00000301891,9606.ENSP00000302716,…	SULT2A1,CYP3A43,CYP3A5,CCL2,SULT1E1,CDKN1B,AKR7A2,AHR,UGT2A3,FMO5,CYP2C9,UGT2B10,SLC5A1,SLC22A9,ABCC3,CYP2C18,NOD2,SLC22A11,MUC17,GUSB,UGT1A6,UGT2B7,UGT1A1,UGT2B4,SULT1B1,SLC22A13,SULT1C2,UGT2B17,SLC2A2,ABCC5,SLC22A8,UGT2B15,CYP1A2,UGT1A10,KCNJ11,UGT1A9,FMO1,ARNT,SULF2,COMT,FMO4,FMO3,OVGP1,SLC16A4,ABCD3,CYP2C8,CYP2C19,SLC22A7,UGT1A4,UGT1A8,TLR4,MUC21,SLC22A12,SLC22A6,MUC3A,PDHA1,CYP1A1,SULT1A1,SU…
TISSUES	BTO:0000759	Liver	52	2125	0.62	1.42	2.47e-17	9606.ENSP00000222002,9606.ENSP00000222382,9606.ENSP00000222982,9606.ENSP00000226444,9606.ENSP00000235835,9606.ENSP00000242057,9606.ENSP00000251566,9606.ENSP00000254090,9606.ENSP00000260682,9606.ENSP00000265403,9606.ENSP00000279178,9606.ENSP00000285238,9606.ENSP00000285979,9606.ENSP00000302728,9606.ENSP00000303174,9606.ENSP00000304811,9606.ENSP00000304845,9606.ENSP00000305221,9606.ENSP00000308770,…	SULT2A1,CYP3A43,CYP3A5,SULT1E1,AKR7A2,AHR,UGT2A3,FMO5,CYP2C9,UGT2B10,SLC22A9,ABCC3,CYP2C18,GUSB,UGT1A6,UGT2B7,UGT1A1,UGT2B4,SULT1B1,UGT2B17,SLC2A2,UGT2B15,CYP1A2,UGT1A9,FMO1,ARNT,COMT,FMO4,FMO3,ABCD3,CYP2C8,CYP2C19,SLC22A7,UGT1A4,UGT1A8,TLR4,PDHA1,CYP1A1,SULT1A1,SULT1A2,ABCC1,ITGA6,UGT1A3,PPIA,HIF1A,CYP2E1,SLC16A1,LDHA,AKT1,ABCC2,PDK3,CYP3A4
TISSUES	BTO:0000345	Digestive gland	57	2881	0.53	1.18	1.88e-15	9606.ENSP00000222002,9606.ENSP00000222382,9606.ENSP00000222982,9606.ENSP00000225831,9606.ENSP00000226444,9606.ENSP00000235835,9606.ENSP00000242057,9606.ENSP00000251566,9606.ENSP00000254090,9606.ENSP00000260682,9606.ENSP00000265403,9606.ENSP00000279178,9606.ENSP00000285238,9606.ENSP00000285979,9606.ENSP00000302728,9606.ENSP00000303174,9606.ENSP00000304811,9606.ENSP00000304845,9606.ENSP00000305221,…	SULT2A1,CYP3A43,CYP3A5,CCL2,SULT1E1,AKR7A2,AHR,UGT2A3,FMO5,CYP2C9,UGT2B10,SLC22A9,ABCC3,CYP2C18,GUSB,UGT1A6,UGT2B7,UGT1A1,UGT2B4,SULT1B1,UGT2B17,SLC2A2,ABCC5,UGT2B15,CYP1A2,KCNJ11,UGT1A9,FMO1,ARNT,COMT,FMO4,FMO3,ABCD3,CYP2C8,CYP2C19,SLC22A7,UGT1A4,UGT1A8,TLR4,PDHA1,CYP1A1,SULT1A1,SULT1A2,ABCC1,ITGA6,UGT1A3,PPIA,HIF1A,CYP2E1,SLC16A1,LDHA,AKT1,ABCC2,ABCG2,MYD88,PDK3,CYP3A4
TISSUES	BTO:0000522	Gland	86	7004	0.32	0.8	2.22e-14	9606.ENSP00000222002,9606.ENSP00000222382,9606.ENSP00000222982,9606.ENSP00000225831,9606.ENSP00000226444,9606.ENSP00000228872,9606.ENSP00000235835,9606.ENSP00000242057,9606.ENSP00000251566,9606.ENSP00000254090,9606.ENSP00000260010,9606.ENSP00000260128,9606.ENSP00000260682,9606.ENSP00000265403,9606.ENSP00000279178,9606.ENSP00000285238,9606.ENSP00000285979,9606.ENSP00000300589,9606.ENSP00000301891,…	SULT2A1,CYP3A43,CYP3A5,CCL2,SULT1E1,CDKN1B,AKR7A2,AHR,UGT2A3,FMO5,TLR2,SULF1,CYP2C9,UGT2B10,SLC22A9,ABCC3,CYP2C18,NOD2,SLC22A11,GUSB,UGT1A6,UGT2B7,UGT1A1,UGT2B4,SULT1B1,SLC22A13,SULT1C2,UGT2B17,SLC2A2,SULT4A1,ABCC5,SLC22A8,UGT2B15,CYP1A2,UGT1A10,KCNJ11,UGT1A9,FMO1,ARNT,SULF2,COMT,FMO4,FMO3,OVGP1,SLC16A4,ABCD3,CYP2C8,CYP2C19,SLC22A7,UGT1A4,UGT1A8,TLR4,SLC22A12,SLC22A6,PDHA1,CYP1A1,SULT1A1,SULT1A2,…
TISSUES	BTO:0001488	Endocrine gland	70	6403	0.27	0.61	3.92e-07	9606.ENSP00000222002,9606.ENSP00000222382,9606.ENSP00000222982,9606.ENSP00000225831,9606.ENSP00000226444,9606.ENSP00000235835,9606.ENSP00000242057,9606.ENSP00000251566,9606.ENSP00000254090,9606.ENSP00000260010,9606.ENSP00000260128,9606.ENSP00000260682,9606.ENSP00000265403,9606.ENSP00000279178,9606.ENSP00000285238,9606.ENSP00000285979,9606.ENSP00000300589,9606.ENSP00000302728,9606.ENSP00000303174,…	SULT2A1,CYP3A43,CYP3A5,CCL2,SULT1E1,AKR7A2,AHR,UGT2A3,FMO5,TLR2,SULF1,CYP2C9,UGT2B10,SLC22A9,ABCC3,CYP2C18,NOD2,GUSB,UGT1A6,UGT2B7,UGT1A1,UGT2B4,SULT1B1,UGT2B17,SLC2A2,SULT4A1,ABCC5,UGT2B15,CYP1A2,KCNJ11,UGT1A9,FMO1,ARNT,SULF2,COMT,FMO4,FMO3,OVGP1,ABCD3,CYP2C8,CYP2C19,SLC22A7,UGT1A4,UGT1A8,TLR4,PDHA1,CYP1A1,SULT1A1,SULT1A2,ABCC1,ITGA6,MUC6,MUC4,UGT1A3,PPIA,MUC15,HIF1A,CYP2E1,SLC16A1,LDHA,AKT1,SLC…
TISSUES	BTO:0001489	Whole body	104	13099	0.13	0.46	2.89e-06	9606.ENSP00000201586,9606.ENSP00000209929,9606.ENSP00000222002,9606.ENSP00000222382,9606.ENSP00000222982,9606.ENSP00000225831,9606.ENSP00000226444,9606.ENSP00000228872,9606.ENSP00000235835,9606.ENSP00000242057,9606.ENSP00000251566,9606.ENSP00000254090,9606.ENSP00000260010,9606.ENSP00000260128,9606.ENSP00000260682,9606.ENSP00000265403,9606.ENSP00000266088,9606.ENSP00000272452,9606.ENSP00000279178,…	SULT2B1,FMO2,SULT2A1,CYP3A43,CYP3A5,CCL2,SULT1E1,CDKN1B,AKR7A2,AHR,UGT2A3,FMO5,TLR2,SULF1,CYP2C9,UGT2B10,SLC5A1,SULT1C4,SLC22A9,ABCC3,CYP2C18,EMCN,NOD2,SLC22A11,MUC17,GUSB,UGT1A6,UGT2B7,UGT1A1,UGT2B4,SULT1B1,SLC22A13,UGT8,SULT1C2,UGT2B17,SLC2A2,SULT4A1,ABCC5,SLC22A8,UGT2B15,CYP1A2,UGT1A10,KCNJ11,UGT1A9,FMO1,ARNT,SULF2,COMT,FMO4,FMO3,OVGP1,SLC16A4,ABCD3,CYP2C8,CYP2C19,SLC22A7,UGT1A4,UGT1A8,TLR4,MU…
TISSUES	BTO:0000431	Excretory gland	27	1385	0.52	0.76	1.12e-05	9606.ENSP00000228872,9606.ENSP00000260682,9606.ENSP00000279178,9606.ENSP00000300589,9606.ENSP00000301891,9606.ENSP00000304811,9606.ENSP00000310241,9606.ENSP00000319622,9606.ENSP00000323568,9606.ENSP00000337335,9606.ENSP00000341045,9606.ENSP00000343838,9606.ENSP00000345708,9606.ENSP00000346768,9606.ENSP00000358794,9606.ENSP00000360317,9606.ENSP00000361666,9606.ENSP00000362508,9606.ENSP00000363089,…	CDKN1B,CYP2C9,SLC22A9,NOD2,SLC22A11,UGT2B7,SLC22A13,SULT1C2,SLC2A2,SLC22A8,UGT2B15,UGT1A10,KCNJ11,UGT1A9,SLC16A4,CYP2C8,SLC22A7,UGT1A4,TLR4,SLC22A12,SLC22A6,SLC22A5,MUC20,PPIA,MUC15,LDHA,ABCC4
TISSUES	BTO:0000671	Kidney	23	1039	0.58	0.8	1.35e-05	9606.ENSP00000228872,9606.ENSP00000260682,9606.ENSP00000279178,9606.ENSP00000301891,9606.ENSP00000304811,9606.ENSP00000310241,9606.ENSP00000319622,9606.ENSP00000323568,9606.ENSP00000337335,9606.ENSP00000343838,9606.ENSP00000346768,9606.ENSP00000358794,9606.ENSP00000360317,9606.ENSP00000361666,9606.ENSP00000362508,9606.ENSP00000363089,9606.ENSP00000366797,9606.ENSP00000367102,9606.ENSP00000402760,…	CDKN1B,CYP2C9,SLC22A9,SLC22A11,UGT2B7,SLC22A13,SULT1C2,SLC2A2,SLC22A8,UGT1A10,UGT1A9,SLC16A4,CYP2C8,SLC22A7,UGT1A4,TLR4,SLC22A12,SLC22A6,SLC22A5,MUC20,PPIA,LDHA,ABCC4
TISSUES	BTO:0000058	Alimentary canal	32	2021	0.43	0.64	4.22e-05	9606.ENSP00000222982,9606.ENSP00000235835,9606.ENSP00000266088,9606.ENSP00000285979,9606.ENSP00000300589,9606.ENSP00000301891,9606.ENSP00000302716,9606.ENSP00000302728,9606.ENSP00000319622,9606.ENSP00000343838,9606.ENSP00000346901,9606.ENSP00000353007,9606.ENSP00000361666,9606.ENSP00000362549,9606.ENSP00000363089,9606.ENSP00000365473,9606.ENSP00000368771,9606.ENSP00000378972,9606.ENSP00000406861,…	CYP3A5,AKR7A2,SLC5A1,CYP2C18,NOD2,SLC22A11,MUC17,GUSB,SULT1C2,UGT1A10,FMO1,SULF2,SLC22A7,UGT1A8,TLR4,MUC21,MUC3A,SULT1A1,MUC6,MUC20,MUC4,PPIA,MUC5B,HIF1A,SLC16A1,MUC12,LDHA,MUC1,MUC13,MUC5AC,MUC2,MYD88
TISSUES	BTO:0000511	Gastrointestinal tract	30	1816	0.45	0.66	4.25e-05	9606.ENSP00000222982,9606.ENSP00000235835,9606.ENSP00000266088,9606.ENSP00000285979,9606.ENSP00000300589,9606.ENSP00000301891,9606.ENSP00000302716,9606.ENSP00000302728,9606.ENSP00000319622,9606.ENSP00000343838,9606.ENSP00000346901,9606.ENSP00000353007,9606.ENSP00000361666,9606.ENSP00000362549,9606.ENSP00000363089,9606.ENSP00000368771,9606.ENSP00000378972,9606.ENSP00000406861,9606.ENSP00000414350,…	CYP3A5,AKR7A2,SLC5A1,CYP2C18,NOD2,SLC22A11,MUC17,GUSB,SULT1C2,UGT1A10,FMO1,SULF2,SLC22A7,UGT1A8,TLR4,MUC3A,SULT1A1,MUC6,MUC20,MUC4,PPIA,MUC5B,SLC16A1,MUC12,LDHA,MUC1,MUC13,MUC5AC,MUC2,MYD88
TISSUES	BTO:0000648	Intestine	25	1349	0.5	0.68	6.27e-05	9606.ENSP00000222982,9606.ENSP00000266088,9606.ENSP00000300589,9606.ENSP00000301891,9606.ENSP00000302716,9606.ENSP00000302728,9606.ENSP00000343838,9606.ENSP00000346901,9606.ENSP00000353007,9606.ENSP00000361666,9606.ENSP00000362549,9606.ENSP00000363089,9606.ENSP00000368771,9606.ENSP00000378972,9606.ENSP00000406861,9606.ENSP00000414350,9606.ENSP00000417498,9606.ENSP00000419425,9606.ENSP00000436812,…	CYP3A5,SLC5A1,NOD2,SLC22A11,MUC17,GUSB,UGT1A10,FMO1,SULF2,SLC22A7,UGT1A8,TLR4,MUC3A,SULT1A1,MUC6,MUC20,MUC4,PPIA,MUC5B,SLC16A1,MUC12,LDHA,MUC13,MUC5AC,MUC2
TISSUES	BTO:0001244	Urinary tract	24	1258	0.51	0.69	6.27e-05	9606.ENSP00000225831,9606.ENSP00000228872,9606.ENSP00000260682,9606.ENSP00000279178,9606.ENSP00000301891,9606.ENSP00000304811,9606.ENSP00000310241,9606.ENSP00000319622,9606.ENSP00000323568,9606.ENSP00000337335,9606.ENSP00000343838,9606.ENSP00000346768,9606.ENSP00000358794,9606.ENSP00000360317,9606.ENSP00000361666,9606.ENSP00000362508,9606.ENSP00000363089,9606.ENSP00000366797,9606.ENSP00000367102,…	CCL2,CDKN1B,CYP2C9,SLC22A9,SLC22A11,UGT2B7,SLC22A13,SULT1C2,SLC2A2,SLC22A8,UGT1A10,UGT1A9,SLC16A4,CYP2C8,SLC22A7,UGT1A4,TLR4,SLC22A12,SLC22A6,SLC22A5,MUC20,PPIA,LDHA,ABCC4
TISSUES	BTO:0003092	Urinary system	24	1249	0.51	0.69	6.27e-05	9606.ENSP00000225831,9606.ENSP00000228872,9606.ENSP00000260682,9606.ENSP00000279178,9606.ENSP00000301891,9606.ENSP00000304811,9606.ENSP00000310241,9606.ENSP00000319622,9606.ENSP00000323568,9606.ENSP00000337335,9606.ENSP00000343838,9606.ENSP00000346768,9606.ENSP00000358794,9606.ENSP00000360317,9606.ENSP00000361666,9606.ENSP00000362508,9606.ENSP00000363089,9606.ENSP00000366797,9606.ENSP00000367102,…	CCL2,CDKN1B,CYP2C9,SLC22A9,SLC22A11,UGT2B7,SLC22A13,SULT1C2,SLC2A2,SLC22A8,UGT1A10,UGT1A9,SLC16A4,CYP2C8,SLC22A7,UGT1A4,TLR4,SLC22A12,SLC22A6,SLC22A5,MUC20,PPIA,LDHA,ABCC4
TISSUES	BTO:0000269	Colon	16	639	0.63	0.7	0.00024	9606.ENSP00000222982,9606.ENSP00000301891,9606.ENSP00000302728,9606.ENSP00000343838,9606.ENSP00000353007,9606.ENSP00000361666,9606.ENSP00000362549,9606.ENSP00000368771,9606.ENSP00000378972,9606.ENSP00000414350,9606.ENSP00000417498,9606.ENSP00000441065,9606.ENSP00000441929,9606.ENSP00000485028,9606.ENSP00000485659,9606.ENSP00000494061	CYP3A5,SLC22A11,GUSB,UGT1A10,SULF2,SLC22A7,UGT1A8,MUC3A,SULT1A1,MUC20,MUC4,SLC16A1,MUC12,MUC13,MUC5AC,MUC2
TISSUES	BTO:0000416	Epithelium	16	697	0.59	0.62	0.00066	9606.ENSP00000260010,9606.ENSP00000260128,9606.ENSP00000266088,9606.ENSP00000296420,9606.ENSP00000320401,9606.ENSP00000351407,9606.ENSP00000358747,9606.ENSP00000363089,9606.ENSP00000406861,9606.ENSP00000436812,9606.ENSP00000437955,9606.ENSP00000451828,9606.ENSP00000475028,9606.ENSP00000485659,9606.ENSP00000494061,9606.ENSP00000496355	TLR2,SULF1,SLC5A1,EMCN,UGT2B17,ARNT,OVGP1,TLR4,MUC6,MUC5B,HIF1A,AKT1,UGT2A2,MUC5AC,MUC2,TLR5
TISSUES	BTO:0000781	Intestinal epithelium	5	40	1.33	0.81	0.00091	9606.ENSP00000266088,9606.ENSP00000363089,9606.ENSP00000436812,9606.ENSP00000485659,9606.ENSP00000494061	SLC5A1,TLR4,MUC5B,MUC5AC,MUC2
TISSUES	BTO:0003918	KB-3-1 cell	3	4	2.11	0.87	0.00091	9606.ENSP00000382342,9606.ENSP00000478255,9606.ENSP00000498246	ABCC1,ABCB1,ABCG2
TISSUES	BTO:0001120	Epithelial cell line	8	179	0.88	0.65	0.0018	9606.ENSP00000296420,9606.ENSP00000302716,9606.ENSP00000358747,9606.ENSP00000436812,9606.ENSP00000451828,9606.ENSP00000485659,9606.ENSP00000494061,9606.ENSP00000498939	EMCN,MUC17,OVGP1,MUC5B,AKT1,MUC5AC,MUC2,CYP3A4
TISSUES	BTO:0000000	Tissues, cell types and enzyme sources	107	15199	0.08	0.33	0.0019	9606.ENSP00000201586,9606.ENSP00000209929,9606.ENSP00000222002,9606.ENSP00000222382,9606.ENSP00000222982,9606.ENSP00000225831,9606.ENSP00000226444,9606.ENSP00000228872,9606.ENSP00000235835,9606.ENSP00000242057,9606.ENSP00000251566,9606.ENSP00000254090,9606.ENSP00000260010,9606.ENSP00000260128,9606.ENSP00000260682,9606.ENSP00000265403,9606.ENSP00000266088,9606.ENSP00000272452,9606.ENSP00000279178,…	SULT2B1,FMO2,SULT2A1,CYP3A43,CYP3A5,CCL2,SULT1E1,CDKN1B,AKR7A2,AHR,UGT2A3,FMO5,TLR2,SULF1,CYP2C9,UGT2B10,SLC5A1,SULT1C4,SLC22A9,ABCC3,CYP2C18,EMCN,NOD2,SLC22A11,MUC17,GUSB,UGT1A6,UGT2B7,UGT1A1,UGT2B4,SULT1B1,SLC22A13,UGT8,SULT1C2,SLC16A6,UGT2B17,SLC2A2,SULT4A1,ABCC5,SLC22A8,UGT2B15,CYP1A2,UGT1A10,KCNJ11,UGT1A9,FMO1,ARNT,SULF2,COMT,FMO4,FMO3,OVGP1,SLC16A4,ABCD3,CYP2C8,CYP2C19,SLC22A7,UGT1A4,UGT1A8…
TISSUES	BTO:0000419	Respiratory epithelium	5	50	1.23	0.72	0.0019	9606.ENSP00000436812,9606.ENSP00000437955,9606.ENSP00000475028,9606.ENSP00000485659,9606.ENSP00000494061	MUC5B,HIF1A,UGT2A2,MUC5AC,MUC2
TISSUES	BTO:0001540	Goblet cell	3	7	1.86	0.74	0.0024	9606.ENSP00000436812,9606.ENSP00000485659,9606.ENSP00000494061	MUC5B,MUC5AC,MUC2
TISSUES	BTO:0001388	Trachea	8	201	0.83	0.59	0.0032	9606.ENSP00000254090,9606.ENSP00000266088,9606.ENSP00000402760,9606.ENSP00000407422,9606.ENSP00000419425,9606.ENSP00000437955,9606.ENSP00000475028,9606.ENSP00000485659	FMO5,SLC5A1,SLC22A5,MUC7,PPIA,HIF1A,UGT2A2,MUC5AC
TISSUES	BTO:0000042	Animal	106	15148	0.07	0.32	0.0039	9606.ENSP00000201586,9606.ENSP00000209929,9606.ENSP00000222002,9606.ENSP00000222382,9606.ENSP00000222982,9606.ENSP00000225831,9606.ENSP00000226444,9606.ENSP00000228872,9606.ENSP00000235835,9606.ENSP00000242057,9606.ENSP00000251566,9606.ENSP00000254090,9606.ENSP00000260010,9606.ENSP00000260128,9606.ENSP00000260682,9606.ENSP00000265403,9606.ENSP00000266088,9606.ENSP00000272452,9606.ENSP00000279178,…	SULT2B1,FMO2,SULT2A1,CYP3A43,CYP3A5,CCL2,SULT1E1,CDKN1B,AKR7A2,AHR,UGT2A3,FMO5,TLR2,SULF1,CYP2C9,UGT2B10,SLC5A1,SULT1C4,SLC22A9,ABCC3,CYP2C18,EMCN,NOD2,SLC22A11,MUC17,GUSB,UGT1A6,UGT2B7,UGT1A1,UGT2B4,SULT1B1,SLC22A13,UGT8,SULT1C2,SLC16A6,UGT2B17,SLC2A2,SULT4A1,ABCC5,SLC22A8,UGT2B15,CYP1A2,UGT1A10,KCNJ11,UGT1A9,FMO1,ARNT,SULF2,COMT,FMO4,FMO3,OVGP1,SLC16A4,ABCD3,CYP2C8,CYP2C19,SLC22A7,UGT1A4,UGT1A8…
TISSUES	BTO:0000203	Respiratory system	24	1707	0.38	0.43	0.0048	9606.ENSP00000209929,9606.ENSP00000254090,9606.ENSP00000260010,9606.ENSP00000266088,9606.ENSP00000296420,9606.ENSP00000302728,9606.ENSP00000353007,9606.ENSP00000358794,9606.ENSP00000359233,9606.ENSP00000363089,9606.ENSP00000380252,9606.ENSP00000402760,9606.ENSP00000407422,9606.ENSP00000417498,9606.ENSP00000419425,9606.ENSP00000436812,9606.ENSP00000437955,9606.ENSP00000445175,9606.ENSP00000451828,…	FMO2,FMO5,TLR2,SLC5A1,EMCN,GUSB,SULF2,SLC16A4,ABCD3,TLR4,NFE2L2,SLC22A5,MUC7,MUC4,PPIA,MUC5B,HIF1A,LDHA,AKT1,UGT2A2,CYP1B1,MUC1,MUC5AC,MUC2
TISSUES	BTO:0000297	Carcinoma cell line	7	161	0.87	0.57	0.0048	9606.ENSP00000296420,9606.ENSP00000302716,9606.ENSP00000436812,9606.ENSP00000451828,9606.ENSP00000485659,9606.ENSP00000494061,9606.ENSP00000498939	EMCN,MUC17,MUC5B,AKT1,MUC5AC,MUC2,CYP3A4
TISSUES	BTO:0000353	Lung cell line	5	85	1	0.48	0.0141	9606.ENSP00000235835,9606.ENSP00000378972,9606.ENSP00000436812,9606.ENSP00000451828,9606.ENSP00000485659	AKR7A2,SULT1A1,MUC5B,AKT1,MUC5AC
TISSUES	BTO:0000003	Intestinal cell line	4	47	1.16	0.5	0.0145	9606.ENSP00000266088,9606.ENSP00000451828,9606.ENSP00000494061,9606.ENSP00000498939	SLC5A1,AKT1,MUC2,CYP3A4
TISSUES	BTO:0000634	Integument	26	2112	0.32	0.35	0.0145	9606.ENSP00000201586,9606.ENSP00000242057,9606.ENSP00000260010,9606.ENSP00000260128,9606.ENSP00000266088,9606.ENSP00000296420,9606.ENSP00000320401,9606.ENSP00000351407,9606.ENSP00000353007,9606.ENSP00000354511,9606.ENSP00000358747,9606.ENSP00000363089,9606.ENSP00000368771,9606.ENSP00000386896,9606.ENSP00000406861,9606.ENSP00000417498,9606.ENSP00000419425,9606.ENSP00000436812,9606.ENSP00000437955,…	SULT2B1,AHR,TLR2,SULF1,SLC5A1,EMCN,UGT2B17,ARNT,SULF2,COMT,OVGP1,TLR4,MUC3A,ITGA6,MUC6,MUC4,PPIA,MUC5B,HIF1A,MUC12,LDHA,AKT1,UGT2A2,MUC5AC,MUC2,TLR5
TISSUES	BTO:0000763	Lung	20	1395	0.39	0.37	0.0145	9606.ENSP00000209929,9606.ENSP00000260010,9606.ENSP00000296420,9606.ENSP00000302728,9606.ENSP00000353007,9606.ENSP00000358794,9606.ENSP00000359233,9606.ENSP00000363089,9606.ENSP00000380252,9606.ENSP00000417498,9606.ENSP00000419425,9606.ENSP00000436812,9606.ENSP00000437955,9606.ENSP00000445175,9606.ENSP00000451828,9606.ENSP00000475028,9606.ENSP00000478561,9606.ENSP00000484824,9606.ENSP00000485659,…	FMO2,TLR2,EMCN,GUSB,SULF2,SLC16A4,ABCD3,TLR4,NFE2L2,MUC4,PPIA,MUC5B,HIF1A,LDHA,AKT1,UGT2A2,CYP1B1,MUC1,MUC5AC,MUC2
TISSUES	BTO:0002418	NCI-H292 cell	2	2	2.23	0.53	0.0145	9606.ENSP00000436812,9606.ENSP00000485659	MUC5B,MUC5AC
TISSUES	BTO:0003319	Hepa-1 cell	2	2	2.23	0.53	0.0145	9606.ENSP00000242057,9606.ENSP00000378488	AHR,CYP1A1
TISSUES	BTO:0003603	Respiratory mucus	2	2	2.23	0.53	0.0145	9606.ENSP00000436812,9606.ENSP00000485659	MUC5B,MUC5AC
TISSUES	BTO:0003917	KB-V1 cell	2	2	2.23	0.53	0.0145	9606.ENSP00000478255,9606.ENSP00000498246	ABCB1,ABCG2
TISSUES	BTO:0004524	Germinal epithelium	2	2	2.23	0.53	0.0145	9606.ENSP00000436812,9606.ENSP00000485659	MUC5B,MUC5AC
TISSUES	BTO:0004607	MDCK-2 cell	2	2	2.23	0.53	0.0145	9606.ENSP00000478255,9606.ENSP00000498246	ABCB1,ABCG2
TISSUES	BTO:0005215	KB-C2 cell	2	2	2.23	0.53	0.0145	9606.ENSP00000382342,9606.ENSP00000478255	ABCC1,ABCB1
TISSUES	BTO:0001315	Sublingual gland	2	3	2.05	0.5	0.0185	9606.ENSP00000407422,9606.ENSP00000436812	MUC7,MUC5B
TISSUES	BTO:0002894	Hepa-1c1c7 cell	2	3	2.05	0.5	0.0185	9606.ENSP00000242057,9606.ENSP00000378488	AHR,CYP1A1
TISSUES	BTO:0003751	Submucosal gland	2	3	2.05	0.5	0.0185	9606.ENSP00000436812,9606.ENSP00000485659	MUC5B,MUC5AC
TISSUES	BTO:0000167	Adenocarcinoma cell line	5	107	0.9	0.41	0.026	9606.ENSP00000296420,9606.ENSP00000302716,9606.ENSP00000451828,9606.ENSP00000494061,9606.ENSP00000498939	EMCN,MUC17,AKT1,MUC2,CYP3A4
TISSUES	BTO:0000794	Pancreatic cancer cell line	4	62	1.04	0.41	0.0301	9606.ENSP00000302716,9606.ENSP00000417498,9606.ENSP00000451828,9606.ENSP00000484824	MUC17,MUC4,AKT1,MUC1
TISSUES	BTO:0000180	Cervical carcinoma cell	8	322	0.63	0.35	0.0333	9606.ENSP00000228872,9606.ENSP00000351407,9606.ENSP00000380252,9606.ENSP00000382342,9606.ENSP00000445175,9606.ENSP00000451828,9606.ENSP00000478255,9606.ENSP00000484824	CDKN1B,ARNT,NFE2L2,ABCC1,LDHA,AKT1,ABCB1,MUC1
TISSUES	BTO:0002925	Tracheobronchial epithelium	2	5	1.83	0.42	0.0333	9606.ENSP00000436812,9606.ENSP00000485659	MUC5B,MUC5AC
TISSUES	BTO:0006251	Renal proximal tubule cell	2	5	1.83	0.42	0.0333	9606.ENSP00000337335,9606.ENSP00000367102	SLC22A8,SLC22A6
TISSUES	BTO:0001914	Colorectal adenocarcinoma cell line	3	29	1.24	0.39	0.0385	9606.ENSP00000451828,9606.ENSP00000494061,9606.ENSP00000498939	AKT1,MUC2,CYP3A4
TISSUES	BTO:0000886	Mucosa	8	340	0.6	0.32	0.0452	9606.ENSP00000368771,9606.ENSP00000386896,9606.ENSP00000417498,9606.ENSP00000436812,9606.ENSP00000441929,9606.ENSP00000475028,9606.ENSP00000485659,9606.ENSP00000494061	MUC3A,ITGA6,MUC4,MUC5B,MUC12,UGT2A2,MUC5AC,MUC2
COMPARTMENTS	GOCC:0016324	Apical plasma membrane	19	167	1.29	2.89	3.57e-15	9606.ENSP00000264162,9606.ENSP00000266088,9606.ENSP00000301891,9606.ENSP00000302716,9606.ENSP00000310241,9606.ENSP00000321735,9606.ENSP00000333926,9606.ENSP00000337335,9606.ENSP00000366797,9606.ENSP00000382342,9606.ENSP00000402760,9606.ENSP00000441065,9606.ENSP00000463978,9606.ENSP00000465734,9606.ENSP00000478255,9606.ENSP00000485028,9606.ENSP00000494609,9606.ENSP00000497274,9606.ENSP00000498246	LCT,SLC5A1,SLC22A11,MUC17,SLC22A13,SLC16A8,ABCC5,SLC22A8,SLC22A12,ABCC1,SLC22A5,SLC16A1,SLC16A3,SLC16A2,ABCB1,MUC13,ABCC4,ABCC2,ABCG2
COMPARTMENTS	GOCC:0005796	Golgi lumen	16	102	1.43	3.08	1.07e-14	9606.ENSP00000302716,9606.ENSP00000365473,9606.ENSP00000368771,9606.ENSP00000381008,9606.ENSP00000406861,9606.ENSP00000407422,9606.ENSP00000414350,9606.ENSP00000417498,9606.ENSP00000431983,9606.ENSP00000436812,9606.ENSP00000441929,9606.ENSP00000484824,9606.ENSP00000485028,9606.ENSP00000485659,9606.ENSP00000494061,9606.ENSP00000495398	MUC17,MUC21,MUC3A,MUC16,MUC6,MUC7,MUC20,MUC4,MUC15,MUC5B,MUC12,MUC1,MUC13,MUC5AC,MUC2,MUC19
COMPARTMENTS	GOCC:0045177	Apical part of cell	20	237	1.16	2.5	3.07e-14	9606.ENSP00000264162,9606.ENSP00000266088,9606.ENSP00000301891,9606.ENSP00000302716,9606.ENSP00000310241,9606.ENSP00000321735,9606.ENSP00000333926,9606.ENSP00000337335,9606.ENSP00000366797,9606.ENSP00000382342,9606.ENSP00000402760,9606.ENSP00000441065,9606.ENSP00000463978,9606.ENSP00000465734,9606.ENSP00000478255,9606.ENSP00000484824,9606.ENSP00000485028,9606.ENSP00000494609,9606.ENSP00000497274,…	LCT,SLC5A1,SLC22A11,MUC17,SLC22A13,SLC16A8,ABCC5,SLC22A8,SLC22A12,ABCC1,SLC22A5,SLC16A1,SLC16A3,SLC16A2,ABCB1,MUC1,MUC13,ABCC4,ABCC2,ABCG2
COMPARTMENTS	GOCC:0012505	Endomembrane system	51	3156	0.44	0.88	7.93e-10	9606.ENSP00000222382,9606.ENSP00000222982,9606.ENSP00000226444,9606.ENSP00000254090,9606.ENSP00000260010,9606.ENSP00000260128,9606.ENSP00000260682,9606.ENSP00000285979,9606.ENSP00000302716,9606.ENSP00000302728,9606.ENSP00000303174,9606.ENSP00000304845,9606.ENSP00000310241,9606.ENSP00000311648,9606.ENSP00000334276,9606.ENSP00000342007,9606.ENSP00000343838,9606.ENSP00000346768,9606.ENSP00000353007,…	CYP3A43,CYP3A5,SULT1E1,FMO5,TLR2,SULF1,CYP2C9,CYP2C18,MUC17,GUSB,UGT1A6,UGT1A1,SLC22A13,UGT8,UGT2B28,CYP1A2,UGT1A10,UGT1A9,SULF2,OVGP1,CYP2C8,CYP2C19,UGT1A4,UGT1A7,UGT1A8,TLR4,MUC21,MUC3A,CYP1A1,NFE2L2,MUC16,MUC6,MUC7,MUC20,MUC4,UGT1A3,PPIA,MUC15,MUC5B,CYP2E1,MUC12,SLC16A3,CYP1B1,MUC1,MUC13,MUC5AC,MUC2,ABCC4,MUC19,MYD88,CYP3A4
COMPARTMENTS	GOCC:0098590	Plasma membrane region	24	676	0.78	1.38	9.16e-10	9606.ENSP00000264162,9606.ENSP00000266088,9606.ENSP00000279178,9606.ENSP00000300589,9606.ENSP00000301891,9606.ENSP00000302716,9606.ENSP00000310241,9606.ENSP00000321735,9606.ENSP00000333926,9606.ENSP00000337335,9606.ENSP00000361666,9606.ENSP00000366797,9606.ENSP00000367102,9606.ENSP00000382342,9606.ENSP00000402760,9606.ENSP00000414350,9606.ENSP00000441065,9606.ENSP00000463978,9606.ENSP00000465734,…	LCT,SLC5A1,SLC22A9,NOD2,SLC22A11,MUC17,SLC22A13,SLC16A8,ABCC5,SLC22A8,SLC22A7,SLC22A12,SLC22A6,ABCC1,SLC22A5,MUC20,SLC16A1,SLC16A3,SLC16A2,ABCB1,MUC13,ABCC4,ABCC2,ABCG2
COMPARTMENTS	GOCC:0009925	Basal plasma membrane	12	124	1.22	1.8	9.6e-09	9606.ENSP00000279178,9606.ENSP00000300589,9606.ENSP00000321735,9606.ENSP00000333926,9606.ENSP00000337335,9606.ENSP00000361666,9606.ENSP00000367102,9606.ENSP00000382342,9606.ENSP00000414350,9606.ENSP00000441065,9606.ENSP00000463978,9606.ENSP00000494609	SLC22A9,NOD2,SLC16A8,ABCC5,SLC22A8,SLC22A7,SLC22A6,ABCC1,MUC20,SLC16A1,SLC16A3,ABCC4
COMPARTMENTS	GOCC:0005886	Plasma membrane	47	3535	0.35	0.65	3.28e-06	9606.ENSP00000260010,9606.ENSP00000264162,9606.ENSP00000266088,9606.ENSP00000279178,9606.ENSP00000285238,9606.ENSP00000296420,9606.ENSP00000300589,9606.ENSP00000301891,9606.ENSP00000302716,9606.ENSP00000310241,9606.ENSP00000319991,9606.ENSP00000321735,9606.ENSP00000323568,9606.ENSP00000333926,9606.ENSP00000337335,9606.ENSP00000345708,9606.ENSP00000354511,9606.ENSP00000358794,9606.ENSP00000361666,…	TLR2,LCT,SLC5A1,SLC22A9,ABCC3,EMCN,NOD2,SLC22A11,MUC17,SLC22A13,SLC16A6,SLC16A8,SLC2A2,ABCC5,SLC22A8,KCNJ11,COMT,SLC16A4,SLC22A7,TLR4,SLC22A12,SLC22A6,MUC3A,NFE2L2,MUC16,ABCC1,ITGA6,SLC16A5,SLC22A5,MUC20,MUC4,MUC15,MUC5B,SLC16A1,MUC12,SLC16A7,AKT1,SLC16A3,SLC16A2,ABCB1,MUC1,MUC13,ABCC4,TLR5,ABCC2,ABCG2,MYD88
COMPARTMENTS	GOCC:0005783	Endoplasmic reticulum	24	1095	0.57	0.82	5.92e-06	9606.ENSP00000222382,9606.ENSP00000222982,9606.ENSP00000254090,9606.ENSP00000260128,9606.ENSP00000260682,9606.ENSP00000285979,9606.ENSP00000303174,9606.ENSP00000304845,9606.ENSP00000310241,9606.ENSP00000334276,9606.ENSP00000342007,9606.ENSP00000343838,9606.ENSP00000346768,9606.ENSP00000353007,9606.ENSP00000360317,9606.ENSP00000360372,9606.ENSP00000362508,9606.ENSP00000362525,9606.ENSP00000362549,…	CYP3A43,CYP3A5,FMO5,SULF1,CYP2C9,CYP2C18,UGT1A6,UGT1A1,SLC22A13,UGT2B28,CYP1A2,UGT1A10,UGT1A9,SULF2,CYP2C8,CYP2C19,UGT1A4,UGT1A7,UGT1A8,CYP1A1,UGT1A3,CYP2E1,CYP1B1,CYP3A4
COMPARTMENTS	GOCC:0016020	Membrane	62	5715	0.27	0.56	7.27e-06	9606.ENSP00000209929,9606.ENSP00000222382,9606.ENSP00000222982,9606.ENSP00000226444,9606.ENSP00000254090,9606.ENSP00000260010,9606.ENSP00000260128,9606.ENSP00000264162,9606.ENSP00000266088,9606.ENSP00000279178,9606.ENSP00000285238,9606.ENSP00000296420,9606.ENSP00000300589,9606.ENSP00000301891,9606.ENSP00000302716,9606.ENSP00000310241,9606.ENSP00000311648,9606.ENSP00000319991,9606.ENSP00000321735,…	FMO2,CYP3A43,CYP3A5,SULT1E1,FMO5,TLR2,SULF1,LCT,SLC5A1,SLC22A9,ABCC3,EMCN,NOD2,SLC22A11,MUC17,SLC22A13,UGT8,SLC16A6,SLC16A8,SLC2A2,ABCC5,UGT2B28,SLC22A8,KCNJ11,COMT,FMO3,SLC16A4,ABCD3,CYP2C8,CYP2C19,SLC22A7,TLR4,SLC22A12,SLC22A6,MUC3A,CYP1A1,NFE2L2,MUC16,ABCC1,ITGA6,SLC16A5,SLC22A5,MUC20,MUC4,MUC15,MUC5B,CYP2E1,SLC16A1,MUC12,SLC16A7,AKT1,SLC16A3,SLC16A2,ABCB1,MUC1,MUC13,ABCC4,TLR5,ABCC2,ABCG2,MYD…
COMPARTMENTS	GOCC:0034751	Aryl hydrocarbon receptor complex	5	13	1.82	1.39	9.75e-06	9606.ENSP00000242057,9606.ENSP00000342007,9606.ENSP00000351407,9606.ENSP00000378488,9606.ENSP00000478561	AHR,CYP1A2,ARNT,CYP1A1,CYP1B1
COMPARTMENTS	GOCC:1990281	Efflux pump complex	4	5	2.13	1.31	2.43e-05	9606.ENSP00000382342,9606.ENSP00000478255,9606.ENSP00000497274,9606.ENSP00000498246	ABCC1,ABCB1,ABCC2,ABCG2
COMPARTMENTS	GOCC:0098591	External side of apical plasma membrane	4	6	2.05	1.26	3.5e-05	9606.ENSP00000264162,9606.ENSP00000478255,9606.ENSP00000494609,9606.ENSP00000498246	LCT,ABCB1,ABCC4,ABCG2
COMPARTMENTS	GOCC:0005794	Golgi apparatus	20	931	0.56	0.71	8.76e-05	9606.ENSP00000260010,9606.ENSP00000260128,9606.ENSP00000302716,9606.ENSP00000310241,9606.ENSP00000363089,9606.ENSP00000365473,9606.ENSP00000368771,9606.ENSP00000381008,9606.ENSP00000406861,9606.ENSP00000407422,9606.ENSP00000414350,9606.ENSP00000417498,9606.ENSP00000431983,9606.ENSP00000436812,9606.ENSP00000441929,9606.ENSP00000484824,9606.ENSP00000485028,9606.ENSP00000485659,9606.ENSP00000494061,…	TLR2,SULF1,MUC17,SLC22A13,TLR4,MUC21,MUC3A,MUC16,MUC6,MUC7,MUC20,MUC4,MUC15,MUC5B,MUC12,MUC1,MUC13,MUC5AC,MUC2,MUC19
COMPARTMENTS	GOCC:0071159	NF-kappaB complex	5	26	1.51	1.05	0.00013	9606.ENSP00000225831,9606.ENSP00000260010,9606.ENSP00000363089,9606.ENSP00000451828,9606.ENSP00000498321	CCL2,TLR2,TLR4,AKT1,MYD88
COMPARTMENTS	GOCC:1990350	Glucose transporter complex	4	11	1.79	1.04	0.00019	9606.ENSP00000266088,9606.ENSP00000323568,9606.ENSP00000437955,9606.ENSP00000445175	SLC5A1,SLC2A2,HIF1A,LDHA
COMPARTMENTS	GOCC:0009986	Cell surface	13	438	0.7	0.72	0.00029	9606.ENSP00000260010,9606.ENSP00000260128,9606.ENSP00000264162,9606.ENSP00000300589,9606.ENSP00000301891,9606.ENSP00000302716,9606.ENSP00000353007,9606.ENSP00000363089,9606.ENSP00000386896,9606.ENSP00000478255,9606.ENSP00000494609,9606.ENSP00000497274,9606.ENSP00000498246	TLR2,SULF1,LCT,NOD2,SLC22A11,MUC17,SULF2,TLR4,ITGA6,ABCB1,ABCC4,ABCC2,ABCG2
COMPARTMENTS	GOCC:0005737	Cytoplasm	73	8195	0.18	0.42	0.00037	9606.ENSP00000201586,9606.ENSP00000209929,9606.ENSP00000222002,9606.ENSP00000222382,9606.ENSP00000222982,9606.ENSP00000226444,9606.ENSP00000228872,9606.ENSP00000235835,9606.ENSP00000242057,9606.ENSP00000254090,9606.ENSP00000260010,9606.ENSP00000260128,9606.ENSP00000260682,9606.ENSP00000272452,9606.ENSP00000285979,9606.ENSP00000300589,9606.ENSP00000302716,9606.ENSP00000302728,9606.ENSP00000303174,…	SULT2B1,FMO2,SULT2A1,CYP3A43,CYP3A5,SULT1E1,CDKN1B,AKR7A2,AHR,FMO5,TLR2,SULF1,CYP2C9,SULT1C4,CYP2C18,NOD2,MUC17,GUSB,UGT1A6,UGT1A1,SULT1B1,SLC22A13,UGT8,SULT1C2,SULT4A1,UGT2B28,UGT2B15,CYP1A2,UGT1A10,UGT1A9,ARNT,SULF2,COMT,FMO3,OVGP1,ABCD3,CYP2C8,CYP2C19,UGT1A4,UGT1A7,UGT1A8,TLR4,MUC21,MUC3A,PDHA1,CYP1A1,SULT1A1,SULT1A2,NFE2L2,MUC16,MUC6,MUC7,MUC20,MUC4,UGT1A3,PPIA,MUC15,MUC5B,HIF1A,CYP2E1,MUC12,…
COMPARTMENTS	GOCC:0009897	External side of plasma membrane	7	102	1.07	0.84	0.00039	9606.ENSP00000264162,9606.ENSP00000301891,9606.ENSP00000302716,9606.ENSP00000363089,9606.ENSP00000478255,9606.ENSP00000494609,9606.ENSP00000498246	LCT,SLC22A11,MUC17,TLR4,ABCB1,ABCC4,ABCG2
COMPARTMENTS	GOCC:0031226	Intrinsic component of plasma membrane	17	851	0.53	0.56	0.0012	9606.ENSP00000260010,9606.ENSP00000264162,9606.ENSP00000266088,9606.ENSP00000300589,9606.ENSP00000301891,9606.ENSP00000345708,9606.ENSP00000363089,9606.ENSP00000367102,9606.ENSP00000382342,9606.ENSP00000386896,9606.ENSP00000441065,9606.ENSP00000441929,9606.ENSP00000448071,9606.ENSP00000451828,9606.ENSP00000465734,9606.ENSP00000484824,9606.ENSP00000498321	TLR2,LCT,SLC5A1,NOD2,SLC22A11,KCNJ11,TLR4,SLC22A6,ABCC1,ITGA6,SLC16A1,MUC12,SLC16A7,AKT1,SLC16A2,MUC1,MYD88
COMPARTMENTS	GOCC:0110165	Cellular anatomical entity	102	14060	0.09	0.34	0.0018	9606.ENSP00000201586,9606.ENSP00000209929,9606.ENSP00000222002,9606.ENSP00000222382,9606.ENSP00000222982,9606.ENSP00000225831,9606.ENSP00000226444,9606.ENSP00000228872,9606.ENSP00000235835,9606.ENSP00000242057,9606.ENSP00000254090,9606.ENSP00000260010,9606.ENSP00000260128,9606.ENSP00000260682,9606.ENSP00000264162,9606.ENSP00000266088,9606.ENSP00000272452,9606.ENSP00000279178,9606.ENSP00000285238,…	SULT2B1,FMO2,SULT2A1,CYP3A43,CYP3A5,CCL2,SULT1E1,CDKN1B,AKR7A2,AHR,FMO5,TLR2,SULF1,CYP2C9,LCT,SLC5A1,SULT1C4,SLC22A9,ABCC3,CYP2C18,EMCN,NOD2,SLC22A11,MUC17,GUSB,UGT1A6,UGT1A1,SULT1B1,SLC22A13,UGT8,SULT1C2,SLC16A6,SLC16A8,SLC2A2,SULT4A1,ABCC5,UGT2B28,SLC22A8,UGT2B15,CYP1A2,UGT1A10,KCNJ11,UGT1A9,ARNT,SULF2,COMT,FMO3,OVGP1,SLC16A4,ABCD3,CYP2C8,CYP2C19,SLC22A7,UGT1A4,UGT1A7,UGT1A8,TLR4,MUC21,SLC22A12…
COMPARTMENTS	GOCC:0005887	Integral component of plasma membrane	16	792	0.54	0.54	0.0019	9606.ENSP00000260010,9606.ENSP00000264162,9606.ENSP00000266088,9606.ENSP00000301891,9606.ENSP00000345708,9606.ENSP00000363089,9606.ENSP00000367102,9606.ENSP00000382342,9606.ENSP00000386896,9606.ENSP00000441065,9606.ENSP00000441929,9606.ENSP00000448071,9606.ENSP00000451828,9606.ENSP00000465734,9606.ENSP00000484824,9606.ENSP00000498321	TLR2,LCT,SLC5A1,SLC22A11,KCNJ11,TLR4,SLC22A6,ABCC1,ITGA6,SLC16A1,MUC12,SLC16A7,AKT1,SLC16A2,MUC1,MYD88
COMPARTMENTS	GOCC:0005903	Brush border	5	56	1.18	0.68	0.0027	9606.ENSP00000266088,9606.ENSP00000323568,9606.ENSP00000366797,9606.ENSP00000402760,9606.ENSP00000498246	SLC5A1,SLC2A2,SLC22A12,SLC22A5,ABCG2
COMPARTMENTS	GOCC:0031224	Intrinsic component of membrane	23	1606	0.39	0.42	0.0054	9606.ENSP00000260010,9606.ENSP00000264162,9606.ENSP00000266088,9606.ENSP00000300589,9606.ENSP00000301891,9606.ENSP00000345708,9606.ENSP00000363089,9606.ENSP00000366797,9606.ENSP00000367102,9606.ENSP00000368771,9606.ENSP00000382342,9606.ENSP00000386896,9606.ENSP00000417498,9606.ENSP00000441065,9606.ENSP00000441929,9606.ENSP00000448071,9606.ENSP00000451828,9606.ENSP00000465734,9606.ENSP00000478255,…	TLR2,LCT,SLC5A1,NOD2,SLC22A11,KCNJ11,TLR4,SLC22A12,SLC22A6,MUC3A,ABCC1,ITGA6,MUC4,SLC16A1,MUC12,SLC16A7,AKT1,SLC16A2,ABCB1,MUC1,ABCC2,ABCG2,MYD88
COMPARTMENTS	GOCC:0016021	Integral component of membrane	22	1507	0.39	0.42	0.0059	9606.ENSP00000260010,9606.ENSP00000264162,9606.ENSP00000266088,9606.ENSP00000301891,9606.ENSP00000345708,9606.ENSP00000363089,9606.ENSP00000366797,9606.ENSP00000367102,9606.ENSP00000368771,9606.ENSP00000382342,9606.ENSP00000386896,9606.ENSP00000417498,9606.ENSP00000441065,9606.ENSP00000441929,9606.ENSP00000448071,9606.ENSP00000451828,9606.ENSP00000465734,9606.ENSP00000478255,9606.ENSP00000484824,…	TLR2,LCT,SLC5A1,SLC22A11,KCNJ11,TLR4,SLC22A12,SLC22A6,MUC3A,ABCC1,ITGA6,MUC4,SLC16A1,MUC12,SLC16A7,AKT1,SLC16A2,ABCB1,MUC1,ABCC2,ABCG2,MYD88
COMPARTMENTS	GOCC:0031526	Brush border membrane	4	34	1.3	0.61	0.0059	9606.ENSP00000266088,9606.ENSP00000366797,9606.ENSP00000402760,9606.ENSP00000498246	SLC5A1,SLC22A12,SLC22A5,ABCG2
COMPARTMENTS	GOCC:0070701	Mucus layer	3	12	1.63	0.61	0.0067	9606.ENSP00000436812,9606.ENSP00000485659,9606.ENSP00000494061	MUC5B,MUC5AC,MUC2
COMPARTMENTS	GOCC:0034753	Nuclear aryl hydrocarbon receptor complex	2	2	2.23	0.52	0.0154	9606.ENSP00000378488,9606.ENSP00000478561	CYP1A1,CYP1B1
COMPARTMENTS	GOCC:0098552	Side of membrane	8	264	0.71	0.43	0.0154	9606.ENSP00000264162,9606.ENSP00000301891,9606.ENSP00000302716,9606.ENSP00000363089,9606.ENSP00000451828,9606.ENSP00000478255,9606.ENSP00000494609,9606.ENSP00000498246	LCT,SLC22A11,MUC17,TLR4,AKT1,ABCB1,ABCC4,ABCG2
COMPARTMENTS	GOCC:0043235	Receptor complex	10	425	0.6	0.4	0.0173	9606.ENSP00000242057,9606.ENSP00000260010,9606.ENSP00000342007,9606.ENSP00000351407,9606.ENSP00000363089,9606.ENSP00000378488,9606.ENSP00000386896,9606.ENSP00000451828,9606.ENSP00000478561,9606.ENSP00000498321	AHR,TLR2,CYP1A2,ARNT,TLR4,CYP1A1,ITGA6,AKT1,CYP1B1,MYD88
COMPARTMENTS	GOCC:0034752	Cytosolic aryl hydrocarbon receptor complex	2	3	2.05	0.47	0.0234	9606.ENSP00000242057,9606.ENSP00000378488	AHR,CYP1A1
COMPARTMENTS	GOCC:1990351	Transporter complex	9	395	0.59	0.33	0.0409	9606.ENSP00000266088,9606.ENSP00000323568,9606.ENSP00000345708,9606.ENSP00000382342,9606.ENSP00000437955,9606.ENSP00000445175,9606.ENSP00000478255,9606.ENSP00000497274,9606.ENSP00000498246	SLC5A1,SLC2A2,KCNJ11,ABCC1,HIF1A,LDHA,ABCB1,ABCC2,ABCG2
UniProt Keywords	KW-0492	Microsome	34	132	1.64	7.52	6.3e-41	9606.ENSP00000201586,9606.ENSP00000209929,9606.ENSP00000222382,9606.ENSP00000222982,9606.ENSP00000254090,9606.ENSP00000260682,9606.ENSP00000265403,9606.ENSP00000285979,9606.ENSP00000303174,9606.ENSP00000304811,9606.ENSP00000304845,9606.ENSP00000305221,9606.ENSP00000320401,9606.ENSP00000334276,9606.ENSP00000337450,9606.ENSP00000341045,9606.ENSP00000342007,9606.ENSP00000343838,9606.ENSP00000346768,…	SULT2B1,FMO2,CYP3A43,CYP3A5,FMO5,CYP2C9,UGT2B10,CYP2C18,UGT1A6,UGT2B7,UGT1A1,UGT2B4,UGT2B17,UGT2B28,CYP3A7,UGT2B15,CYP1A2,UGT1A10,UGT1A9,FMO1,FMO4,FMO3,CYP2C8,CYP2C19,UGT1A4,UGT1A5,UGT1A7,UGT1A8,CYP1A1,UGT2B11,UGT1A3,CYP2E1,CYP1B1,CYP3A4
UniProt Keywords	KW-0503	Monooxygenase	17	79	1.56	3.97	2.36e-18	9606.ENSP00000209929,9606.ENSP00000222382,9606.ENSP00000222982,9606.ENSP00000254090,9606.ENSP00000260682,9606.ENSP00000285979,9606.ENSP00000337450,9606.ENSP00000342007,9606.ENSP00000346901,9606.ENSP00000356723,9606.ENSP00000356729,9606.ENSP00000360317,9606.ENSP00000360372,9606.ENSP00000378488,9606.ENSP00000440689,9606.ENSP00000478561,9606.ENSP00000498939	FMO2,CYP3A43,CYP3A5,FMO5,CYP2C9,CYP2C18,CYP3A7,CYP1A2,FMO1,FMO4,FMO3,CYP2C8,CYP2C19,CYP1A1,CYP2E1,CYP1B1,CYP3A4
UniProt Keywords	KW-0325	Glycoprotein	68	4386	0.42	0.97	9.8e-15	9606.ENSP00000225831,9606.ENSP00000251566,9606.ENSP00000260010,9606.ENSP00000260128,9606.ENSP00000265403,9606.ENSP00000266088,9606.ENSP00000279178,9606.ENSP00000285238,9606.ENSP00000296420,9606.ENSP00000301891,9606.ENSP00000302716,9606.ENSP00000302728,9606.ENSP00000303174,9606.ENSP00000304811,9606.ENSP00000304845,9606.ENSP00000305221,9606.ENSP00000310241,9606.ENSP00000311648,9606.ENSP00000320401,…	CCL2,UGT2A3,TLR2,SULF1,UGT2B10,SLC5A1,SLC22A9,ABCC3,EMCN,SLC22A11,MUC17,GUSB,UGT1A6,UGT2B7,UGT1A1,UGT2B4,SLC22A13,UGT8,UGT2B17,SLC2A2,SLC22A10,ABCC5,UGT2B28,SLC22A8,UGT2B15,CYP1A2,UGT1A10,UGT1A9,SULF2,OVGP1,ABCD3,SLC22A7,UGT1A4,UGT1A5,UGT1A7,UGT1A8,TLR4,MUC21,SLC22A12,SLC22A6,MUC3A,CYP1A1,NFE2L2,MUC16,ABCC1,ITGA6,UGT2B11,SLC22A5,MUC6,MUC7,MUC20,MUC4,UGT1A3,PPIA,MUC15,MUC5B,MUC12,AKT1,UGT2A2,ABCB1…
UniProt Keywords	KW-0256	Endoplasmic reticulum	36	1168	0.72	1.55	1.86e-14	9606.ENSP00000201586,9606.ENSP00000209929,9606.ENSP00000222382,9606.ENSP00000222982,9606.ENSP00000254090,9606.ENSP00000260128,9606.ENSP00000260682,9606.ENSP00000265403,9606.ENSP00000285979,9606.ENSP00000303174,9606.ENSP00000304811,9606.ENSP00000304845,9606.ENSP00000305221,9606.ENSP00000320401,9606.ENSP00000334276,9606.ENSP00000337450,9606.ENSP00000341045,9606.ENSP00000342007,9606.ENSP00000343838,…	SULT2B1,FMO2,CYP3A43,CYP3A5,FMO5,SULF1,CYP2C9,UGT2B10,CYP2C18,UGT1A6,UGT2B7,UGT1A1,UGT2B4,UGT2B17,UGT2B28,CYP3A7,UGT2B15,CYP1A2,UGT1A10,UGT1A9,FMO1,SULF2,FMO4,FMO3,CYP2C8,CYP2C19,UGT1A4,UGT1A5,UGT1A7,UGT1A8,CYP1A1,UGT2B11,UGT1A3,CYP2E1,CYP1B1,CYP3A4
UniProt Keywords	KW-0328	Glycosyltransferase	19	228	1.15	2.48	4.37e-14	9606.ENSP00000251566,9606.ENSP00000265403,9606.ENSP00000303174,9606.ENSP00000304811,9606.ENSP00000304845,9606.ENSP00000305221,9606.ENSP00000311648,9606.ENSP00000320401,9606.ENSP00000334276,9606.ENSP00000341045,9606.ENSP00000343838,9606.ENSP00000346768,9606.ENSP00000362508,9606.ENSP00000362513,9606.ENSP00000362525,9606.ENSP00000362549,9606.ENSP00000387683,9606.ENSP00000418532,9606.ENSP00000475028	UGT2A3,UGT2B10,UGT1A6,UGT2B7,UGT1A1,UGT2B4,UGT8,UGT2B17,UGT2B28,UGT2B15,UGT1A10,UGT1A9,UGT1A4,UGT1A5,UGT1A7,UGT1A8,UGT2B11,UGT1A3,UGT2A2
UniProt Keywords	KW-0472	Membrane	84	7068	0.3	0.77	1.82e-13	9606.ENSP00000209929,9606.ENSP00000222382,9606.ENSP00000222982,9606.ENSP00000251566,9606.ENSP00000254090,9606.ENSP00000260010,9606.ENSP00000260682,9606.ENSP00000264162,9606.ENSP00000265403,9606.ENSP00000266088,9606.ENSP00000279178,9606.ENSP00000285238,9606.ENSP00000285979,9606.ENSP00000296420,9606.ENSP00000300589,9606.ENSP00000301891,9606.ENSP00000302716,9606.ENSP00000303174,9606.ENSP00000304811,…	FMO2,CYP3A43,CYP3A5,UGT2A3,FMO5,TLR2,CYP2C9,LCT,UGT2B10,SLC5A1,SLC22A9,ABCC3,CYP2C18,EMCN,NOD2,SLC22A11,MUC17,UGT1A6,UGT2B7,UGT1A1,UGT2B4,SLC22A13,UGT8,SLC16A6,UGT2B17,SLC16A8,SLC2A2,SLC22A10,ABCC5,UGT2B28,SLC22A8,CYP3A7,UGT2B15,CYP1A2,UGT1A10,KCNJ11,UGT1A9,FMO1,COMT,FMO4,FMO3,SLC16A4,ABCD3,CYP2C8,CYP2C19,SLC22A7,UGT1A4,UGT1A5,UGT1A7,UGT1A8,TLR4,MUC21,SLC22A12,SLC22A6,MUC3A,CYP1A1,MUC16,ABCC1,ITG…
UniProt Keywords	KW-1133	Transmembrane helix	70	5040	0.37	0.87	3.58e-13	9606.ENSP00000209929,9606.ENSP00000251566,9606.ENSP00000254090,9606.ENSP00000260010,9606.ENSP00000264162,9606.ENSP00000265403,9606.ENSP00000266088,9606.ENSP00000279178,9606.ENSP00000285238,9606.ENSP00000296420,9606.ENSP00000301891,9606.ENSP00000302716,9606.ENSP00000303174,9606.ENSP00000304811,9606.ENSP00000304845,9606.ENSP00000305221,9606.ENSP00000310241,9606.ENSP00000311648,9606.ENSP00000319991,…	FMO2,UGT2A3,FMO5,TLR2,LCT,UGT2B10,SLC5A1,SLC22A9,ABCC3,EMCN,SLC22A11,MUC17,UGT1A6,UGT2B7,UGT1A1,UGT2B4,SLC22A13,UGT8,SLC16A6,UGT2B17,SLC16A8,SLC2A2,SLC22A10,ABCC5,UGT2B28,SLC22A8,UGT2B15,UGT1A10,KCNJ11,UGT1A9,FMO1,COMT,FMO4,FMO3,SLC16A4,ABCD3,SLC22A7,UGT1A4,UGT1A5,UGT1A7,UGT1A8,TLR4,MUC21,SLC22A12,SLC22A6,MUC3A,MUC16,ABCC1,ITGA6,UGT2B11,SLC16A5,SLC22A5,MUC4,UGT1A3,UGT2A1,MUC15,SLC16A1,MUC12,SLC16…
UniProt Keywords	KW-0753	Steroid metabolism	13	98	1.35	2.5	6.61e-12	9606.ENSP00000201586,9606.ENSP00000222002,9606.ENSP00000222982,9606.ENSP00000260682,9606.ENSP00000304811,9606.ENSP00000308770,9606.ENSP00000332565,9606.ENSP00000342007,9606.ENSP00000360317,9606.ENSP00000378972,9606.ENSP00000378992,9606.ENSP00000478561,9606.ENSP00000498939	SULT2B1,SULT2A1,CYP3A5,CYP2C9,UGT2B7,SULT1B1,SULT4A1,CYP1A2,CYP2C8,SULT1A1,SULT1A2,CYP1B1,CYP3A4
UniProt Keywords	KW-0349	Heme	12	123	1.22	1.94	1.54e-09	9606.ENSP00000222382,9606.ENSP00000222982,9606.ENSP00000260682,9606.ENSP00000285979,9606.ENSP00000337450,9606.ENSP00000342007,9606.ENSP00000360317,9606.ENSP00000360372,9606.ENSP00000378488,9606.ENSP00000440689,9606.ENSP00000478561,9606.ENSP00000498939	CYP3A43,CYP3A5,CYP2C9,CYP2C18,CYP3A7,CYP1A2,CYP2C8,CYP2C19,CYP1A1,CYP2E1,CYP1B1,CYP3A4
UniProt Keywords	KW-0560	Oxidoreductase	20	570	0.78	1.28	1.31e-08	9606.ENSP00000209929,9606.ENSP00000222382,9606.ENSP00000222982,9606.ENSP00000235835,9606.ENSP00000254090,9606.ENSP00000260682,9606.ENSP00000285979,9606.ENSP00000337450,9606.ENSP00000342007,9606.ENSP00000346901,9606.ENSP00000356723,9606.ENSP00000356729,9606.ENSP00000360317,9606.ENSP00000360372,9606.ENSP00000369134,9606.ENSP00000378488,9606.ENSP00000440689,9606.ENSP00000445175,9606.ENSP00000478561,…	FMO2,CYP3A43,CYP3A5,AKR7A2,FMO5,CYP2C9,CYP2C18,CYP3A7,CYP1A2,FMO1,FMO4,FMO3,CYP2C8,CYP2C19,PDHA1,CYP1A1,CYP2E1,LDHA,CYP1B1,CYP3A4
UniProt Keywords	KW-0443	Lipid metabolism	18	485	0.8	1.25	4.49e-08	9606.ENSP00000201586,9606.ENSP00000222002,9606.ENSP00000222982,9606.ENSP00000260682,9606.ENSP00000304811,9606.ENSP00000308770,9606.ENSP00000311648,9606.ENSP00000332565,9606.ENSP00000337450,9606.ENSP00000342007,9606.ENSP00000360317,9606.ENSP00000360372,9606.ENSP00000378488,9606.ENSP00000378972,9606.ENSP00000378992,9606.ENSP00000440689,9606.ENSP00000478561,9606.ENSP00000498939	SULT2B1,SULT2A1,CYP3A5,CYP2C9,UGT2B7,SULT1B1,UGT8,SULT4A1,CYP3A7,CYP1A2,CYP2C8,CYP2C19,CYP1A1,SULT1A1,SULT1A2,CYP2E1,CYP1B1,CYP3A4
UniProt Keywords	KW-0769	Symport	10	112	1.18	1.57	1.31e-07	9606.ENSP00000266088,9606.ENSP00000319991,9606.ENSP00000321735,9606.ENSP00000358794,9606.ENSP00000390564,9606.ENSP00000402760,9606.ENSP00000441065,9606.ENSP00000448071,9606.ENSP00000463978,9606.ENSP00000465734	SLC5A1,SLC16A6,SLC16A8,SLC16A4,SLC16A5,SLC22A5,SLC16A1,SLC16A7,SLC16A3,SLC16A2
UniProt Keywords	KW-0732	Signal	45	3277	0.37	0.7	5.65e-07	9606.ENSP00000225831,9606.ENSP00000251566,9606.ENSP00000260010,9606.ENSP00000260128,9606.ENSP00000264162,9606.ENSP00000265403,9606.ENSP00000296420,9606.ENSP00000302716,9606.ENSP00000302728,9606.ENSP00000303174,9606.ENSP00000304811,9606.ENSP00000304845,9606.ENSP00000305221,9606.ENSP00000311648,9606.ENSP00000320401,9606.ENSP00000334276,9606.ENSP00000341045,9606.ENSP00000343838,9606.ENSP00000346768,…	CCL2,UGT2A3,TLR2,SULF1,LCT,UGT2B10,EMCN,MUC17,GUSB,UGT1A6,UGT2B7,UGT1A1,UGT2B4,UGT8,UGT2B17,UGT2B28,UGT2B15,UGT1A10,UGT1A9,SULF2,OVGP1,UGT1A4,UGT1A5,UGT1A7,UGT1A8,TLR4,MUC21,MUC3A,ITGA6,UGT2B11,MUC6,MUC7,MUC20,MUC4,UGT1A3,UGT2A1,MUC15,MUC5B,MUC12,UGT2A2,MUC1,MUC13,MUC2,MUC19,TLR5
UniProt Keywords	KW-0808	Transferase	32	1820	0.48	0.8	6.25e-07	9606.ENSP00000201586,9606.ENSP00000222002,9606.ENSP00000226444,9606.ENSP00000251566,9606.ENSP00000265403,9606.ENSP00000272452,9606.ENSP00000303174,9606.ENSP00000304811,9606.ENSP00000304845,9606.ENSP00000305221,9606.ENSP00000308770,9606.ENSP00000311648,9606.ENSP00000319622,9606.ENSP00000320401,9606.ENSP00000332565,9606.ENSP00000334276,9606.ENSP00000341045,9606.ENSP00000343838,9606.ENSP00000346768,…	SULT2B1,SULT2A1,SULT1E1,UGT2A3,UGT2B10,SULT1C4,UGT1A6,UGT2B7,UGT1A1,UGT2B4,SULT1B1,UGT8,SULT1C2,UGT2B17,SULT4A1,UGT2B28,UGT2B15,UGT1A10,UGT1A9,COMT,UGT1A4,UGT1A5,UGT1A7,UGT1A8,SULT1A1,SULT1A2,UGT2B11,UGT1A3,UGT2A1,AKT1,UGT2A2,PDK3
UniProt Keywords	KW-0521	NADP	8	170	0.9	0.79	0.0004	9606.ENSP00000209929,9606.ENSP00000235835,9606.ENSP00000254090,9606.ENSP00000346901,9606.ENSP00000356723,9606.ENSP00000356729,9606.ENSP00000360372,9606.ENSP00000440689	FMO2,AKR7A2,FMO5,FMO1,FMO4,FMO3,CYP2C19,CYP2E1
UniProt Keywords	KW-0128	Catecholamine metabolism	3	7	1.86	0.87	0.00085	9606.ENSP00000354511,9606.ENSP00000378972,9606.ENSP00000378992	COMT,SULT1A1,SULT1A2
UniProt Keywords	KW-0813	Transport	27	1978	0.37	0.49	0.001	9606.ENSP00000266088,9606.ENSP00000279178,9606.ENSP00000285238,9606.ENSP00000301891,9606.ENSP00000319991,9606.ENSP00000321735,9606.ENSP00000323568,9606.ENSP00000327569,9606.ENSP00000333926,9606.ENSP00000337335,9606.ENSP00000345708,9606.ENSP00000358794,9606.ENSP00000359233,9606.ENSP00000361666,9606.ENSP00000366797,9606.ENSP00000382342,9606.ENSP00000390564,9606.ENSP00000402760,9606.ENSP00000441065,…	SLC5A1,SLC22A9,ABCC3,SLC22A11,SLC16A6,SLC16A8,SLC2A2,SLC22A10,ABCC5,SLC22A8,KCNJ11,SLC16A4,ABCD3,SLC22A7,SLC22A12,ABCC1,SLC16A5,SLC22A5,SLC16A1,SLC16A7,AKT1,SLC16A3,SLC16A2,ABCB1,ABCC4,ABCC2,ABCG2
UniProt Keywords	KW-1003	Cell membrane	35	3277	0.26	0.36	0.0077	9606.ENSP00000264162,9606.ENSP00000279178,9606.ENSP00000296420,9606.ENSP00000300589,9606.ENSP00000301891,9606.ENSP00000302716,9606.ENSP00000319991,9606.ENSP00000321735,9606.ENSP00000323568,9606.ENSP00000337335,9606.ENSP00000354511,9606.ENSP00000358794,9606.ENSP00000361666,9606.ENSP00000363089,9606.ENSP00000365473,9606.ENSP00000366797,9606.ENSP00000367102,9606.ENSP00000381008,9606.ENSP00000382342,…	LCT,SLC22A9,EMCN,NOD2,SLC22A11,MUC17,SLC16A6,SLC16A8,SLC2A2,SLC22A8,COMT,SLC16A4,SLC22A7,TLR4,MUC21,SLC22A12,SLC22A6,MUC16,ABCC1,ITGA6,SLC16A5,MUC20,MUC4,MUC15,SLC16A1,SLC16A7,AKT1,SLC16A3,SLC16A2,ABCB1,MUC1,MUC13,TLR5,ABCC2,ABCG2
UniProt Keywords	KW-0313	Glucose metabolism	3	19	1.43	0.57	0.0089	9606.ENSP00000369134,9606.ENSP00000451828,9606.ENSP00000498864	PDHA1,AKT1,PDK3
UniProt Keywords	KW-0276	Fatty acid metabolism	6	150	0.83	0.5	0.0096	9606.ENSP00000342007,9606.ENSP00000360372,9606.ENSP00000378488,9606.ENSP00000440689,9606.ENSP00000478561,9606.ENSP00000498939	CYP1A2,CYP2C19,CYP1A1,CYP2E1,CYP1B1,CYP3A4
UniProt Keywords	KW-0274	FAD	5	108	0.9	0.46	0.0156	9606.ENSP00000209929,9606.ENSP00000254090,9606.ENSP00000346901,9606.ENSP00000356723,9606.ENSP00000356729	FMO2,FMO5,FMO1,FMO4,FMO3
UniProt Keywords	KW-1278	Translocase	4	69	0.99	0.43	0.0239	9606.ENSP00000382342,9606.ENSP00000478255,9606.ENSP00000497274,9606.ENSP00000498246	ABCC1,ABCB1,ABCC2,ABCG2
UniProt Keywords	KW-0762	Sugar transport	3	37	1.14	0.38	0.0426	9606.ENSP00000266088,9606.ENSP00000323568,9606.ENSP00000451828	SLC5A1,SLC2A2,AKT1
Pfam	PF04101	Glycosyltransferase family 28 C-terminal domain	20	23	2.17	7.79	7.92e-31	9606.ENSP00000251566,9606.ENSP00000265403,9606.ENSP00000303174,9606.ENSP00000304811,9606.ENSP00000304845,9606.ENSP00000305221,9606.ENSP00000311648,9606.ENSP00000320401,9606.ENSP00000334276,9606.ENSP00000341045,9606.ENSP00000343838,9606.ENSP00000346768,9606.ENSP00000362508,9606.ENSP00000362513,9606.ENSP00000362525,9606.ENSP00000362549,9606.ENSP00000387683,9606.ENSP00000418532,9606.ENSP00000425497,…	UGT2A3,UGT2B10,UGT1A6,UGT2B7,UGT1A1,UGT2B4,UGT8,UGT2B17,UGT2B28,UGT2B15,UGT1A10,UGT1A9,UGT1A4,UGT1A5,UGT1A7,UGT1A8,UGT2B11,UGT1A3,UGT2A1,UGT2A2
Pfam	PF07690	Major Facilitator Superfamily	17	98	1.47	3.45	2.07e-16	9606.ENSP00000279178,9606.ENSP00000301891,9606.ENSP00000310241,9606.ENSP00000319991,9606.ENSP00000321735,9606.ENSP00000323568,9606.ENSP00000327569,9606.ENSP00000337335,9606.ENSP00000358794,9606.ENSP00000366797,9606.ENSP00000367102,9606.ENSP00000390564,9606.ENSP00000402760,9606.ENSP00000441065,9606.ENSP00000448071,9606.ENSP00000463978,9606.ENSP00000465734	SLC22A9,SLC22A11,SLC22A13,SLC16A6,SLC16A8,SLC2A2,SLC22A10,SLC22A8,SLC16A4,SLC22A12,SLC22A6,SLC16A5,SLC22A5,SLC16A1,SLC16A7,SLC16A3,SLC16A2
Pfam	PF00067	Cytochrome P450	12	58	1.55	2.74	5.58e-12	9606.ENSP00000222382,9606.ENSP00000222982,9606.ENSP00000260682,9606.ENSP00000285979,9606.ENSP00000337450,9606.ENSP00000342007,9606.ENSP00000360317,9606.ENSP00000360372,9606.ENSP00000378488,9606.ENSP00000440689,9606.ENSP00000478561,9606.ENSP00000498939	CYP3A43,CYP3A5,CYP2C9,CYP2C18,CYP3A7,CYP1A2,CYP2C8,CYP2C19,CYP1A1,CYP2E1,CYP1B1,CYP3A4
Pfam	PF00685	Sulfotransferase domain	6	17	1.78	1.57	1.9e-06	9606.ENSP00000226444,9606.ENSP00000308770,9606.ENSP00000319622,9606.ENSP00000378570,9606.ENSP00000378972,9606.ENSP00000378992	SULT1E1,SULT1B1,SULT1C2,SULT1A3,SULT1A1,SULT1A2
Pfam	PF00664	ABC transporter transmembrane region	6	24	1.63	1.38	8.35e-06	9606.ENSP00000285238,9606.ENSP00000333926,9606.ENSP00000382342,9606.ENSP00000478255,9606.ENSP00000494609,9606.ENSP00000497274	ABCC3,ABCC5,ABCC1,ABCB1,ABCC4,ABCC2
Pfam	PF07992	Pyridine nucleotide-disulphide oxidoreductase	5	10	1.93	1.42	8.35e-06	9606.ENSP00000209929,9606.ENSP00000254090,9606.ENSP00000346901,9606.ENSP00000356723,9606.ENSP00000356729	FMO2,FMO5,FMO1,FMO4,FMO3
Pfam	PF13469	Sulfotransferase family	4	19	1.55	0.7	0.003	9606.ENSP00000201586,9606.ENSP00000222002,9606.ENSP00000272452,9606.ENSP00000332565	SULT2B1,SULT2A1,SULT1C4,SULT4A1
Pfam	PF01826	Trypsin Inhibitor like cysteine rich domain	3	10	1.71	0.51	0.0155	9606.ENSP00000406861,9606.ENSP00000436812,9606.ENSP00000485659	MUC6,MUC5B,MUC5AC
InterPro	IPR002213	UDP-glucuronosyl/UDP-glucosyltransferase	19	21	2.19	7.36	6.92e-29	9606.ENSP00000251566,9606.ENSP00000265403,9606.ENSP00000303174,9606.ENSP00000304811,9606.ENSP00000304845,9606.ENSP00000305221,9606.ENSP00000311648,9606.ENSP00000320401,9606.ENSP00000334276,9606.ENSP00000341045,9606.ENSP00000343838,9606.ENSP00000346768,9606.ENSP00000362508,9606.ENSP00000362513,9606.ENSP00000362525,9606.ENSP00000362549,9606.ENSP00000387683,9606.ENSP00000418532,9606.ENSP00000425497	UGT2A3,UGT2B10,UGT1A6,UGT2B7,UGT1A1,UGT2B4,UGT8,UGT2B17,UGT2B28,UGT2B15,UGT1A10,UGT1A9,UGT1A4,UGT1A5,UGT1A7,UGT1A8,UGT2B11,UGT1A3,UGT2A1
InterPro	IPR035595	UDP-glycosyltransferase family, conserved site	19	21	2.19	7.36	6.92e-29	9606.ENSP00000251566,9606.ENSP00000265403,9606.ENSP00000303174,9606.ENSP00000304811,9606.ENSP00000304845,9606.ENSP00000305221,9606.ENSP00000311648,9606.ENSP00000320401,9606.ENSP00000334276,9606.ENSP00000341045,9606.ENSP00000343838,9606.ENSP00000346768,9606.ENSP00000362508,9606.ENSP00000362513,9606.ENSP00000362525,9606.ENSP00000362549,9606.ENSP00000387683,9606.ENSP00000418532,9606.ENSP00000425497	UGT2A3,UGT2B10,UGT1A6,UGT2B7,UGT1A1,UGT2B4,UGT8,UGT2B17,UGT2B28,UGT2B15,UGT1A10,UGT1A9,UGT1A4,UGT1A5,UGT1A7,UGT1A8,UGT2B11,UGT1A3,UGT2A1
InterPro	IPR020846	Major facilitator superfamily domain	18	97	1.5	3.72	1.18e-17	9606.ENSP00000279178,9606.ENSP00000301891,9606.ENSP00000310241,9606.ENSP00000319991,9606.ENSP00000321735,9606.ENSP00000323568,9606.ENSP00000327569,9606.ENSP00000337335,9606.ENSP00000358794,9606.ENSP00000361666,9606.ENSP00000366797,9606.ENSP00000367102,9606.ENSP00000390564,9606.ENSP00000402760,9606.ENSP00000441065,9606.ENSP00000448071,9606.ENSP00000463978,9606.ENSP00000465734	SLC22A9,SLC22A11,SLC22A13,SLC16A6,SLC16A8,SLC2A2,SLC22A10,SLC22A8,SLC16A4,SLC22A7,SLC22A12,SLC22A6,SLC16A5,SLC22A5,SLC16A1,SLC16A7,SLC16A3,SLC16A2
InterPro	IPR036259	MFS transporter superfamily	18	139	1.34	3.02	2.91e-15	9606.ENSP00000279178,9606.ENSP00000301891,9606.ENSP00000310241,9606.ENSP00000319991,9606.ENSP00000321735,9606.ENSP00000323568,9606.ENSP00000327569,9606.ENSP00000337335,9606.ENSP00000358794,9606.ENSP00000361666,9606.ENSP00000366797,9606.ENSP00000367102,9606.ENSP00000390564,9606.ENSP00000402760,9606.ENSP00000441065,9606.ENSP00000448071,9606.ENSP00000463978,9606.ENSP00000465734	SLC22A9,SLC22A11,SLC22A13,SLC16A6,SLC16A8,SLC2A2,SLC22A10,SLC22A8,SLC16A4,SLC22A7,SLC22A12,SLC22A6,SLC16A5,SLC22A5,SLC16A1,SLC16A7,SLC16A3,SLC16A2
InterPro	IPR017972	Cytochrome P450, conserved site	12	52	1.59	2.83	3.31e-12	9606.ENSP00000222382,9606.ENSP00000222982,9606.ENSP00000260682,9606.ENSP00000285979,9606.ENSP00000337450,9606.ENSP00000342007,9606.ENSP00000360317,9606.ENSP00000360372,9606.ENSP00000378488,9606.ENSP00000440689,9606.ENSP00000478561,9606.ENSP00000498939	CYP3A43,CYP3A5,CYP2C9,CYP2C18,CYP3A7,CYP1A2,CYP2C8,CYP2C19,CYP1A1,CYP2E1,CYP1B1,CYP3A4
InterPro	IPR001128	Cytochrome P450	12	57	1.55	2.72	7.22e-12	9606.ENSP00000222382,9606.ENSP00000222982,9606.ENSP00000260682,9606.ENSP00000285979,9606.ENSP00000337450,9606.ENSP00000342007,9606.ENSP00000360317,9606.ENSP00000360372,9606.ENSP00000378488,9606.ENSP00000440689,9606.ENSP00000478561,9606.ENSP00000498939	CYP3A43,CYP3A5,CYP2C9,CYP2C18,CYP3A7,CYP1A2,CYP2C8,CYP2C19,CYP1A1,CYP2E1,CYP1B1,CYP3A4
InterPro	IPR036396	Cytochrome P450 superfamily	12	57	1.55	2.72	7.22e-12	9606.ENSP00000222382,9606.ENSP00000222982,9606.ENSP00000260682,9606.ENSP00000285979,9606.ENSP00000337450,9606.ENSP00000342007,9606.ENSP00000360317,9606.ENSP00000360372,9606.ENSP00000378488,9606.ENSP00000440689,9606.ENSP00000478561,9606.ENSP00000498939	CYP3A43,CYP3A5,CYP2C9,CYP2C18,CYP3A7,CYP1A2,CYP2C8,CYP2C19,CYP1A1,CYP2E1,CYP1B1,CYP3A4
InterPro	IPR000863	Sulfotransferase domain	9	32	1.68	2.3	1.58e-09	9606.ENSP00000201586,9606.ENSP00000222002,9606.ENSP00000226444,9606.ENSP00000272452,9606.ENSP00000308770,9606.ENSP00000319622,9606.ENSP00000332565,9606.ENSP00000378972,9606.ENSP00000378992	SULT2B1,SULT2A1,SULT1E1,SULT1C4,SULT1B1,SULT1C2,SULT4A1,SULT1A1,SULT1A2
InterPro	IPR005828	Major facilitator, sugar transporter-like	9	39	1.59	2.11	6.51e-09	9606.ENSP00000301891,9606.ENSP00000310241,9606.ENSP00000323568,9606.ENSP00000327569,9606.ENSP00000337335,9606.ENSP00000361666,9606.ENSP00000366797,9606.ENSP00000367102,9606.ENSP00000402760	SLC22A11,SLC22A13,SLC2A2,SLC22A10,SLC22A8,SLC22A7,SLC22A12,SLC22A6,SLC22A5
InterPro	IPR011701	Major facilitator superfamily	10	67	1.4	1.9	1.81e-08	9606.ENSP00000279178,9606.ENSP00000319991,9606.ENSP00000321735,9606.ENSP00000358794,9606.ENSP00000361666,9606.ENSP00000390564,9606.ENSP00000441065,9606.ENSP00000448071,9606.ENSP00000463978,9606.ENSP00000465734	SLC22A9,SLC16A6,SLC16A8,SLC16A4,SLC22A7,SLC16A5,SLC16A1,SLC16A7,SLC16A3,SLC16A2
InterPro	IPR002401	Cytochrome P450, E-class, group I	8	42	1.51	1.69	3.09e-07	9606.ENSP00000260682,9606.ENSP00000285979,9606.ENSP00000342007,9606.ENSP00000360317,9606.ENSP00000360372,9606.ENSP00000378488,9606.ENSP00000440689,9606.ENSP00000478561	CYP2C9,CYP2C18,CYP1A2,CYP2C8,CYP2C19,CYP1A1,CYP2E1,CYP1B1
InterPro	IPR011527	ABC transporter type 1, transmembrane domain	7	28	1.63	1.65	6.9e-07	9606.ENSP00000285238,9606.ENSP00000333926,9606.ENSP00000359233,9606.ENSP00000382342,9606.ENSP00000478255,9606.ENSP00000494609,9606.ENSP00000497274	ABCC3,ABCC5,ABCD3,ABCC1,ABCB1,ABCC4,ABCC2
InterPro	IPR036640	ABC transporter type 1, transmembrane domain superfamily	7	28	1.63	1.65	6.9e-07	9606.ENSP00000285238,9606.ENSP00000333926,9606.ENSP00000359233,9606.ENSP00000382342,9606.ENSP00000478255,9606.ENSP00000494609,9606.ENSP00000497274	ABCC3,ABCC5,ABCD3,ABCC1,ABCB1,ABCC4,ABCC2
InterPro	IPR003439	ABC transporter-like, ATP-binding domain	8	49	1.44	1.57	7.21e-07	9606.ENSP00000285238,9606.ENSP00000333926,9606.ENSP00000359233,9606.ENSP00000382342,9606.ENSP00000478255,9606.ENSP00000494609,9606.ENSP00000497274,9606.ENSP00000498246	ABCC3,ABCC5,ABCD3,ABCC1,ABCB1,ABCC4,ABCC2,ABCG2
InterPro	IPR000960	Flavin monooxygenase FMO	5	5	2.23	1.74	7.43e-07	9606.ENSP00000209929,9606.ENSP00000254090,9606.ENSP00000346901,9606.ENSP00000356723,9606.ENSP00000356729	FMO2,FMO5,FMO1,FMO4,FMO3
InterPro	IPR004743	Monocarboxylate transporter	5	5	2.23	1.74	7.43e-07	9606.ENSP00000321735,9606.ENSP00000390564,9606.ENSP00000441065,9606.ENSP00000448071,9606.ENSP00000463978	SLC16A8,SLC16A5,SLC16A1,SLC16A7,SLC16A3
InterPro	IPR020946	Flavin monooxygenase-like	5	5	2.23	1.74	7.43e-07	9606.ENSP00000209929,9606.ENSP00000254090,9606.ENSP00000346901,9606.ENSP00000356723,9606.ENSP00000356729	FMO2,FMO5,FMO1,FMO4,FMO3
InterPro	IPR001846	Von Willebrand factor, type D domain	6	16	1.8	1.65	9.74e-07	9606.ENSP00000406861,9606.ENSP00000417498,9606.ENSP00000436812,9606.ENSP00000485659,9606.ENSP00000494061,9606.ENSP00000495398	MUC6,MUC4,MUC5B,MUC5AC,MUC2,MUC19
InterPro	IPR000082	SEA domain	6	22	1.67	1.45	4.53e-06	9606.ENSP00000302716,9606.ENSP00000368771,9606.ENSP00000381008,9606.ENSP00000441929,9606.ENSP00000484824,9606.ENSP00000485028	MUC17,MUC3A,MUC16,MUC12,MUC1,MUC13
InterPro	IPR017871	ABC transporter-like, conserved site	7	44	1.43	1.35	6.6e-06	9606.ENSP00000285238,9606.ENSP00000333926,9606.ENSP00000359233,9606.ENSP00000382342,9606.ENSP00000478255,9606.ENSP00000494609,9606.ENSP00000497274	ABCC3,ABCC5,ABCD3,ABCC1,ABCB1,ABCC4,ABCC2
InterPro	IPR002919	Trypsin Inhibitor-like, cysteine rich domain	5	12	1.85	1.37	1.26e-05	9606.ENSP00000406861,9606.ENSP00000436812,9606.ENSP00000485659,9606.ENSP00000494061,9606.ENSP00000495398	MUC6,MUC5B,MUC5AC,MUC2,MUC19
InterPro	IPR014853	VWF/SSPO/Zonadhesin-like, cysteine-rich domain	5	13	1.82	1.33	1.66e-05	9606.ENSP00000406861,9606.ENSP00000436812,9606.ENSP00000485659,9606.ENSP00000494061,9606.ENSP00000495398	MUC6,MUC5B,MUC5AC,MUC2,MUC19
InterPro	IPR036084	Serine protease inhibitor-like superfamily	5	13	1.82	1.33	1.66e-05	9606.ENSP00000406861,9606.ENSP00000436812,9606.ENSP00000485659,9606.ENSP00000494061,9606.ENSP00000495398	MUC6,MUC5B,MUC5AC,MUC2,MUC19
InterPro	IPR002402	Cytochrome P450, E-class, group II	4	4	2.23	1.33	2.29e-05	9606.ENSP00000222382,9606.ENSP00000222982,9606.ENSP00000337450,9606.ENSP00000498939	CYP3A43,CYP3A5,CYP3A7,CYP3A4
InterPro	IPR008072	Cytochrome P450, E-class, CYP3A	4	4	2.23	1.33	2.29e-05	9606.ENSP00000222382,9606.ENSP00000222982,9606.ENSP00000337450,9606.ENSP00000498939	CYP3A43,CYP3A5,CYP3A7,CYP3A4
InterPro	IPR036364	SEA domain superfamily	5	18	1.67	1.18	5.39e-05	9606.ENSP00000302716,9606.ENSP00000368771,9606.ENSP00000381008,9606.ENSP00000441929,9606.ENSP00000484824	MUC17,MUC3A,MUC16,MUC12,MUC1
InterPro	IPR006207	Cystine knot, C-terminal	5	24	1.55	1.02	0.00018	9606.ENSP00000406861,9606.ENSP00000436812,9606.ENSP00000485659,9606.ENSP00000494061,9606.ENSP00000495398	MUC6,MUC5B,MUC5AC,MUC2,MUC19
InterPro	IPR004749	Organic cation transport protein/SVOP	4	9	1.88	1.04	0.0002	9606.ENSP00000337335,9606.ENSP00000361666,9606.ENSP00000367102,9606.ENSP00000402760	SLC22A8,SLC22A7,SLC22A6,SLC22A5
InterPro	IPR003593	AAA+ ATPase domain	8	139	0.99	0.78	0.00061	9606.ENSP00000285238,9606.ENSP00000333926,9606.ENSP00000359233,9606.ENSP00000382342,9606.ENSP00000478255,9606.ENSP00000494609,9606.ENSP00000497274,9606.ENSP00000498246	ABCC3,ABCC5,ABCD3,ABCC1,ABCB1,ABCC4,ABCC2,ABCG2
InterPro	IPR027417	P-loop containing nucleoside triphosphate hydrolase	18	872	0.54	0.58	0.00099	9606.ENSP00000201586,9606.ENSP00000222002,9606.ENSP00000226444,9606.ENSP00000272452,9606.ENSP00000285238,9606.ENSP00000300589,9606.ENSP00000308770,9606.ENSP00000319622,9606.ENSP00000332565,9606.ENSP00000333926,9606.ENSP00000359233,9606.ENSP00000378972,9606.ENSP00000378992,9606.ENSP00000382342,9606.ENSP00000478255,9606.ENSP00000494609,9606.ENSP00000497274,9606.ENSP00000498246	SULT2B1,SULT2A1,SULT1E1,SULT1C4,ABCC3,NOD2,SULT1B1,SULT1C2,SULT4A1,ABCC5,ABCD3,SULT1A1,SULT1A2,ABCC1,ABCB1,ABCC4,ABCC2,ABCG2
InterPro	IPR001007	VWFC domain	5	40	1.33	0.76	0.0015	9606.ENSP00000406861,9606.ENSP00000436812,9606.ENSP00000485659,9606.ENSP00000494061,9606.ENSP00000495398	MUC6,MUC5B,MUC5AC,MUC2,MUC19
InterPro	IPR005292	Multi drug resistance-associated protein	3	4	2.11	0.81	0.0015	9606.ENSP00000285238,9606.ENSP00000382342,9606.ENSP00000497274	ABCC3,ABCC1,ABCC2
InterPro	IPR025155	WxxW domain	3	6	1.93	0.7	0.0035	9606.ENSP00000436812,9606.ENSP00000485659,9606.ENSP00000494061	MUC5B,MUC5AC,MUC2
InterPro	IPR017241	Toll-like receptor	3	7	1.86	0.66	0.0048	9606.ENSP00000260010,9606.ENSP00000363089,9606.ENSP00000496355	TLR2,TLR4,TLR5
InterPro	IPR036188	FAD/NAD(P)-binding domain superfamily	5	56	1.18	0.59	0.0059	9606.ENSP00000209929,9606.ENSP00000254090,9606.ENSP00000346901,9606.ENSP00000356723,9606.ENSP00000356729	FMO2,FMO5,FMO1,FMO4,FMO3
InterPro	IPR000157	Toll/interleukin-1 receptor homology (TIR) domain	4	27	1.4	0.61	0.0062	9606.ENSP00000260010,9606.ENSP00000363089,9606.ENSP00000496355,9606.ENSP00000498321	TLR2,TLR4,TLR5,MYD88
InterPro	IPR035897	Toll/interleukin-1 receptor homology (TIR) domain superfamily	4	28	1.38	0.6	0.0069	9606.ENSP00000260010,9606.ENSP00000363089,9606.ENSP00000496355,9606.ENSP00000498321	TLR2,TLR4,TLR5,MYD88
InterPro	IPR008066	Cytochrome P450, E-class, group I, CYP1	2	2	2.23	0.41	0.0382	9606.ENSP00000342007,9606.ENSP00000378488	CYP1A2,CYP1A1
InterPro	IPR014615	Extracellular sulfatase	2	2	2.23	0.41	0.0382	9606.ENSP00000260128,9606.ENSP00000353007	SULF1,SULF2
InterPro	IPR024609	Extracellular sulfatase, C-terminal	2	2	2.23	0.41	0.0382	9606.ENSP00000260128,9606.ENSP00000353007	SULF1,SULF2
InterPro	IPR001610	PAC motif	3	18	1.45	0.39	0.0422	9606.ENSP00000242057,9606.ENSP00000351407,9606.ENSP00000437955	AHR,ARNT,HIF1A
SMART	SM00200	Domain found in sea urchin sperm protein, enterokinase, agrin	6	14	1.86	1.65	1.05e-06	9606.ENSP00000302716,9606.ENSP00000368771,9606.ENSP00000381008,9606.ENSP00000441929,9606.ENSP00000484824,9606.ENSP00000485028	MUC17,MUC3A,MUC16,MUC12,MUC1,MUC13
SMART	SM00216	Von Willebrand factor (vWF) type D domain	5	16	1.72	1.19	4.89e-05	9606.ENSP00000406861,9606.ENSP00000417498,9606.ENSP00000436812,9606.ENSP00000485659,9606.ENSP00000494061	MUC6,MUC4,MUC5B,MUC5AC,MUC2
SMART	SM00382	ATPases associated with a variety of cellular activities	8	144	0.97	0.74	0.00086	9606.ENSP00000285238,9606.ENSP00000333926,9606.ENSP00000359233,9606.ENSP00000382342,9606.ENSP00000478255,9606.ENSP00000494609,9606.ENSP00000497274,9606.ENSP00000498246	ABCC3,ABCC5,ABCD3,ABCC1,ABCB1,ABCC4,ABCC2,ABCG2
SMART	SM00255	Toll - interleukin 1 - resistance	4	17	1.6	0.8	0.0013	9606.ENSP00000260010,9606.ENSP00000363089,9606.ENSP00000496355,9606.ENSP00000498321	TLR2,TLR4,TLR5,MYD88
SMART	SM00832	This domain contains 8 conserved cysteine residues, but this family only contains 7 of them to overlaps with other domains. It is found in disease-related proteins including von Willebrand factor, Alpha tectorin, Zonadhesin and Mucin.	3	11	1.67	0.55	0.0111	9606.ENSP00000406861,9606.ENSP00000436812,9606.ENSP00000485659	MUC6,MUC5B,MUC5AC
SMART	SM00041	C-terminal cystine knot-like domain (CTCK)	3	19	1.43	0.4	0.038	9606.ENSP00000406861,9606.ENSP00000436812,9606.ENSP00000485659	MUC6,MUC5B,MUC5AC
