# Supplementary material for: A computational reference for human genomics analysis in (poly)phenol research
Source: Royal Society of Chemistry journal article supplement (doi:10.1039/d5fo03227j), 2025-01-01
Supplement: d5fo03227j4.xlsx [file d5fo03227j4.xlsx]

## Sheet: 8-Means-Clustering
Cluster	Color	Hex code	Gene count	Primary description	Secondary description	Tertiary description	Genes
1	Red	#ff0000	57	Chemical carcinogenesis	Cellular glucuronidation	Aspirin ADME	CYP3A4, ABCB1, SLC16A1, LDHA, AKT1, CYP2E1, UGT2A2, CYP1B1, UGT1A3, CYP2C8, CYP1A1, UGT2B11, UGT1A8, NFE2L2, HIF1A, PDK3, PDHA1, SLC16A4, ARNT, CYP1A2, UGT1A10, UGT1A4, UGT1A7, CYP2C19, UGT1A5, FMO3, UGT1A9, COMT, UGT2B15, UGT2A1, CYP3A7, UGT2B28, SULT1B1, UGT2B17, GUSB, UGT1A1, UGT1A6, FMO1, FMO4, CYP2C9, UGT2B4, CYP2C18, UGT2B7, CYP3A5, UGT2B10, SULT1C4, SULT1E1, UGT2A3, SULT2A1, SULT2B1, CYP3A…
2	Brown	#ffc165	19	Defective GALNT3 causes HFTC	-	-	MUC2, MUC19, MUC5AC, MUC13, MUC1, MUC12, MUC5B, MUC15, MUC4, MUC20, MUC7, MUC6, MUC16, MUC3A, MUC21, OVGP1, EMCN, MUC17, ITGA6
3	Olive	#8eb200	14	Mixed, incl. Xenobiotic transport, and Recycling of bile acids and salts	-	-	ABCG2, ABCC2, ABCC4, ABCC1, ABCC5, SLC22A7, SLC22A6, SLC22A8, ABCC3, SLC22A11, SLC22A12, SLC22A9, SLC22A10, SLC22A13
4	Green	#84ff65	7	Positive regulation of nitric-oxide synthase biosynthesis	Malaria	Diseases associated with the TLR signaling cascade	MYD88, TLR5, SLC22A5, TLR4, NOD2, TLR2, CCL2
5	Lime Green	#00b247	5	Sulfation	Aryl sulfotransferase activity	-	SULT1C2, SULT1A1, SULT1A2, SULT4A1, SULT1A3
6	Cyan	#65feff	4	Carbohydrate digestion and absorption	-	-	SLC2A2, KCNJ11, SLC5A1, LCT
7	Blue	#0047b2	3	Proton-coupled monocarboxylate transport	Lactate transmembrane transporter activity	-	SLC16A3, SLC16A7, SLC16A8
8	Purple	#8465ff	2	-	-	-	SLC16A2, SLC16A5
