# Supplementary material for: A computational reference for human genomics analysis in (poly)phenol research
Source: Royal Society of Chemistry journal article supplement (doi:10.1039/d5fo03227j), 2025-01-01
Supplement: d5fo03227j5.xlsx [file d5fo03227j5.xlsx]

## Sheet: GENE2FUNC
Category	GeneSet	N_genes	N_overlap	p	adjP	genes	link
Curated_gene_sets	WP_METAPATHWAY_BIOTRANSFORMATION_PHASE_I_AND_II	175	44	8.41739e-65	5.4671e-61	AKR7A2:FMO5:FMO3:FMO2:FMO1:FMO4:CYP1B1:SULT1C2:SULT1C4:UGT1A8:UGT1A10:UGT1A9:UGT1A7:UGT1A6:UGT1A5:UGT1A4:UGT1A3:UGT1A1:UGT2B17:UGT2B15:UGT2A3:UGT2B7:UGT2B11:UGT2B28:UGT2B4:UGT2A1:UGT2A2:UGT2A1:SULT1B1:SULT1E1:CYP3A5:CYP3A4:CYP3A43:CYP2C18:CYP2C19:CYP2C9:CYP2C8:CYP2E1:CYP1A1:CYP1A2:SULT1A2:SULT1A1:SULT2A1:SULT2B1:COMT:SULT4A1	http://www.gsea-msigdb.org/gsea/msigdb/human/geneset/WP_METAPATHWAY_BIOTRANSFORMATION_PHASE_I_AND_II
Curated_gene_sets	REACTOME_BIOLOGICAL_OXIDATIONS	206	44	2.62782e-61	8.53385e-58	AKR7A2:ARNT:FMO3:FMO2:FMO1:CYP1B1:SULT1C2:SULT1C4:UGT1A8:UGT1A10:UGT1A9:UGT1A7:UGT1A6:UGT1A5:UGT1A4:UGT1A3:UGT1A1:UGT2B17:UGT2B15:UGT2A3:UGT2B7:UGT2B11:UGT2B28:UGT2B4:UGT2A1:UGT2A2:UGT2A1:SULT1B1:SULT1E1:AHR:CYP3A5:CYP3A4:CYP3A43:CYP2C18:CYP2C19:CYP2C9:CYP2C8:CYP2E1:CYP1A1:CYP1A2:SULT1A2:SULT1A1:SULT2A1:SULT2B1:COMT:SULT4A1	http://www.gsea-msigdb.org/gsea/msigdb/human/geneset/REACTOME_BIOLOGICAL_OXIDATIONS
Curated_gene_sets	REACTOME_DRUG_ADME	100	36	3.02626e-59	6.55185e-56	SLC16A1:SULT1C4:UGT1A8:UGT1A10:UGT1A9:UGT1A7:UGT1A6:UGT1A5:UGT1A4:UGT1A3:UGT1A1:ABCC5:UGT2B17:UGT2B15:UGT2A3:UGT2B7:UGT2B11:UGT2B28:UGT2B4:UGT2A1:UGT2A2:UGT2A1:SULT1E1:ABCG2:SLC22A7:ABCB1:CYP3A4:CYP2C19:CYP2C9:CYP2C8:ABCC2:CYP2E1:SLC22A8:ABCC4:ABCC1:SULT1A1:ABCC3:SULT2A1	http://www.gsea-msigdb.org/gsea/msigdb/human/geneset/REACTOME_DRUG_ADME
Curated_gene_sets	KEGG_DRUG_METABOLISM_CYTOCHROME_P450	68	30	1.44569e-52	2.34743e-49	FMO5:FMO3:FMO2:FMO1:FMO4:UGT1A8:UGT1A10:UGT1A9:UGT1A7:UGT1A6:UGT1A5:UGT1A4:UGT1A3:UGT1A1:UGT2B17:UGT2B15:UGT2A3:UGT2B7:UGT2B11:UGT2B28:UGT2B4:UGT2A1:UGT2A1:CYP3A5:CYP3A4:CYP3A43:CYP2C18:CYP2C19:CYP2C9:CYP2C8:CYP2E1:CYP1A2	http://www.gsea-msigdb.org/gsea/msigdb/human/geneset/KEGG_DRUG_METABOLISM_CYTOCHROME_P450
Curated_gene_sets	REACTOME_ASPIRIN_ADME	39	25	1.69649e-49	2.20374e-46	SLC16A1:UGT1A8:UGT1A9:UGT1A7:UGT1A6:UGT1A5:UGT1A4:UGT1A3:UGT1A1:UGT2B17:UGT2B15:UGT2A3:UGT2B7:UGT2B11:UGT2B28:UGT2B4:UGT2A1:UGT2A2:UGT2A1:SLC22A7:CYP3A4:CYP2C19:CYP2C9:CYP2C8:ABCC2:CYP2E1:ABCC3	http://www.gsea-msigdb.org/gsea/msigdb/human/geneset/REACTOME_ASPIRIN_ADME
Curated_gene_sets	KEGG_METABOLISM_OF_XENOBIOTICS_BY_CYTOCHROME_P450	66	27	3.73388e-46	4.04193e-43	CYP1B1:UGT1A8:UGT1A10:UGT1A9:UGT1A7:UGT1A6:UGT1A5:UGT1A4:UGT1A3:UGT1A1:UGT2B17:UGT2B15:UGT2A3:UGT2B7:UGT2B11:UGT2B28:UGT2B4:UGT2A1:UGT2A1:CYP3A5:CYP3A4:CYP3A43:CYP2C18:CYP2C19:CYP2C9:CYP2C8:CYP2E1:CYP1A1:CYP1A2	http://www.gsea-msigdb.org/gsea/msigdb/human/geneset/KEGG_METABOLISM_OF_XENOBIOTICS_BY_CYTOCHROME_P450
Curated_gene_sets	KEGG_RETINOL_METABOLISM	58	25	1.82835e-43	1.69644e-40	UGT1A8:UGT1A10:UGT1A9:UGT1A7:UGT1A6:UGT1A5:UGT1A4:UGT1A3:UGT1A1:UGT2B17:UGT2B15:UGT2A3:UGT2B7:UGT2B11:UGT2B28:UGT2B4:UGT2A1:UGT2A1:CYP3A5:CYP3A4:CYP3A43:CYP2C18:CYP2C19:CYP2C9:CYP2C8:CYP1A1:CYP1A2	http://www.gsea-msigdb.org/gsea/msigdb/human/geneset/KEGG_RETINOL_METABOLISM
Curated_gene_sets	KEGG_STEROID_HORMONE_BIOSYNTHESIS	50	24	3.3377e-43	2.70979e-40	CYP1B1:UGT1A8:UGT1A10:UGT1A9:UGT1A7:UGT1A6:UGT1A5:UGT1A4:UGT1A3:UGT1A1:UGT2B17:UGT2B15:UGT2A3:UGT2B7:UGT2B11:UGT2B28:UGT2B4:UGT2A1:UGT2A1:SULT1E1:CYP3A5:CYP3A4:CYP3A43:CYP1A1:SULT2B1:COMT	http://www.gsea-msigdb.org/gsea/msigdb/human/geneset/KEGG_STEROID_HORMONE_BIOSYNTHESIS
Curated_gene_sets	REACTOME_PHASE_II_CONJUGATION_OF_COMPOUNDS	101	28	3.53408e-42	2.55043e-39	SULT1C2:SULT1C4:UGT1A8:UGT1A10:UGT1A9:UGT1A7:UGT1A6:UGT1A5:UGT1A4:UGT1A3:UGT1A1:UGT2B17:UGT2B15:UGT2A3:UGT2B7:UGT2B11:UGT2B28:UGT2B4:UGT2A1:UGT2A2:UGT2A1:SULT1B1:SULT1E1:CYP1A2:SULT1A2:SULT1A1:SULT2A1:SULT2B1:COMT:SULT4A1	http://www.gsea-msigdb.org/gsea/msigdb/human/geneset/REACTOME_PHASE_II_CONJUGATION_OF_COMPOUNDS
Curated_gene_sets	WP_TAMOXIFEN_METABOLISM	19	18	1.28761e-41	8.36301e-39	FMO3:FMO1:CYP1B1:UGT1A10:UGT1A4:UGT2B15:UGT2B7:SULT1E1:CYP3A5:CYP3A4:CYP2C19:CYP2C9:CYP2C8:CYP2E1:CYP1A1:CYP1A2:SULT1A1:SULT2A1	http://www.gsea-msigdb.org/gsea/msigdb/human/geneset/WP_TAMOXIFEN_METABOLISM
Curated_gene_sets	REACTOME_GLUCURONIDATION	23	17	1.59675e-35	9.42807e-33	UGT1A8:UGT1A10:UGT1A9:UGT1A7:UGT1A6:UGT1A5:UGT1A4:UGT1A3:UGT1A1:UGT2B17:UGT2B15:UGT2A3:UGT2B7:UGT2B11:UGT2B28:UGT2B4:UGT2A1:UGT2A2:UGT2A1	http://www.gsea-msigdb.org/gsea/msigdb/human/geneset/REACTOME_GLUCURONIDATION
Curated_gene_sets	WP_GLUCURONIDATION	24	17	5.45284e-35	2.95069e-32	UGT1A8:UGT1A10:UGT1A9:UGT1A7:UGT1A6:UGT1A5:UGT1A4:UGT1A3:UGT1A1:UGT2B17:UGT2B15:UGT2A3:UGT2B7:UGT2B11:UGT2B28:UGT2B4:UGT2A1:UGT2A2:UGT2A1	http://www.gsea-msigdb.org/gsea/msigdb/human/geneset/WP_GLUCURONIDATION
Curated_gene_sets	KEGG_DRUG_METABOLISM_OTHER_ENZYMES	46	20	5.90593e-35	2.95069e-32	UGT1A8:UGT1A10:UGT1A9:UGT1A7:UGT1A6:UGT1A5:UGT1A4:UGT1A3:UGT1A1:UGT2B17:UGT2B15:UGT2A3:UGT2B7:UGT2B11:UGT2B28:UGT2B4:UGT2A1:UGT2A1:GUSB:CYP3A5:CYP3A4:CYP3A43	http://www.gsea-msigdb.org/gsea/msigdb/human/geneset/KEGG_DRUG_METABOLISM_OTHER_ENZYMES
Curated_gene_sets	KEGG_PENTOSE_AND_GLUCURONATE_INTERCONVERSIONS	26	17	4.88372e-34	2.2657e-31	UGT1A8:UGT1A10:UGT1A9:UGT1A7:UGT1A6:UGT1A5:UGT1A4:UGT1A3:UGT1A1:UGT2B17:UGT2B15:UGT2A3:UGT2B7:UGT2B11:UGT2B28:UGT2B4:UGT2A1:UGT2A1:GUSB	http://www.gsea-msigdb.org/gsea/msigdb/human/geneset/KEGG_PENTOSE_AND_GLUCURONATE_INTERCONVERSIONS
Curated_gene_sets	KEGG_ASCORBATE_AND_ALDARATE_METABOLISM	23	16	9.10587e-33	3.94284e-30	UGT1A8:UGT1A10:UGT1A9:UGT1A7:UGT1A6:UGT1A5:UGT1A4:UGT1A3:UGT1A1:UGT2B17:UGT2B15:UGT2A3:UGT2B7:UGT2B11:UGT2B28:UGT2B4:UGT2A1:UGT2A1	http://www.gsea-msigdb.org/gsea/msigdb/human/geneset/KEGG_ASCORBATE_AND_ALDARATE_METABOLISM
Curated_gene_sets	REACTOME_PARACETAMOL_ADME	26	16	1.9494e-31	7.91336e-29	SULT1C4:UGT1A10:UGT1A9:UGT1A6:UGT1A1:ABCC5:UGT2B15:SULT1E1:ABCG2:ABCC2:CYP2E1:ABCC4:ABCC1:SULT1A1:ABCC3:SULT2A1	http://www.gsea-msigdb.org/gsea/msigdb/human/geneset/REACTOME_PARACETAMOL_ADME
Curated_gene_sets	KEGG_STARCH_AND_SUCROSE_METABOLISM	47	18	2.77199e-30	1.05906e-27	UGT1A8:UGT1A10:UGT1A9:UGT1A7:UGT1A6:UGT1A5:UGT1A4:UGT1A3:UGT1A1:GBA3:UGT2B17:UGT2B15:UGT2A3:UGT2B7:UGT2B11:UGT2B28:UGT2B4:UGT2A1:UGT2A1:GUSB	http://www.gsea-msigdb.org/gsea/msigdb/human/geneset/KEGG_STARCH_AND_SUCROSE_METABOLISM
Curated_gene_sets	KEGG_PORPHYRIN_AND_CHLOROPHYLL_METABOLISM	39	17	7.57295e-30	2.73257e-27	UGT1A8:UGT1A10:UGT1A9:UGT1A7:UGT1A6:UGT1A5:UGT1A4:UGT1A3:UGT1A1:UGT2B17:UGT2B15:UGT2A3:UGT2B7:UGT2B11:UGT2B28:UGT2B4:UGT2A1:UGT2A1:GUSB	http://www.gsea-msigdb.org/gsea/msigdb/human/geneset/KEGG_PORPHYRIN_AND_CHLOROPHYLL_METABOLISM
Curated_gene_sets	REACTOME_DEFECTIVE_GALNT3_CAUSES_HFTC	15	13	4.92493e-29	1.68355e-26	MUC1:MUC13:MUC20:MUC4:MUC7:MUC21:MUC12:MUC17:RN7SKP54:MUC6:MUC5AC:MUC5B:MUC15:MUC16	http://www.gsea-msigdb.org/gsea/msigdb/human/geneset/REACTOME_DEFECTIVE_GALNT3_CAUSES_HFTC
Curated_gene_sets	REACTOME_DEFECTIVE_C1GALT1C1_CAUSES_TNPS	16	13	2.61598e-28	8.4954e-26	MUC1:MUC13:MUC20:MUC4:MUC7:MUC21:MUC12:MUC17:RN7SKP54:MUC6:MUC5AC:MUC5B:MUC15:MUC16	http://www.gsea-msigdb.org/gsea/msigdb/human/geneset/REACTOME_DEFECTIVE_C1GALT1C1_CAUSES_TNPS
Curated_gene_sets	WP_NUCLEAR_RECEPTORS_METAPATHWAY	306	28	8.83719e-28	2.73322e-25	ARNT:CYP1B1:NFE2L2:UGT1A9:UGT1A7:UGT1A6:UGT1A4:UGT1A1:SLC2A2:ABCC5:UGT2B7:UGT2B4:AHR:ABCB1:CYP3A5:CYP3A4:CYP2C19:CYP2C9:ABCC2:CDKN1B:ABCC4:CYP1A1:CYP1A2:SULT1A1:CCL2:ABCC3:SULT2A1:SLC5A1	http://www.gsea-msigdb.org/gsea/msigdb/human/geneset/WP_NUCLEAR_RECEPTORS_METAPATHWAY
Curated_gene_sets	REACTOME_TERMINATION_OF_O_GLYCAN_BIOSYNTHESIS	22	13	2.26771e-25	6.69491e-23	MUC1:MUC13:MUC20:MUC4:MUC7:MUC21:MUC12:MUC17:RN7SKP54:MUC6:MUC5AC:MUC5B:MUC15:MUC16	http://www.gsea-msigdb.org/gsea/msigdb/human/geneset/REACTOME_TERMINATION_OF_O_GLYCAN_BIOSYNTHESIS
Curated_gene_sets	WP_CODEINE_AND_MORPHINE_METABOLISM	12	11	2.88567e-25	8.14887e-23	UGT1A10:UGT1A9:UGT1A6:UGT1A1:UGT2B7:UGT2B4:ABCB1:CYP3A4:CYP2C8:ABCC2:ABCC3	http://www.gsea-msigdb.org/gsea/msigdb/human/geneset/WP_CODEINE_AND_MORPHINE_METABOLISM
Curated_gene_sets	WP_ESTROGEN_METABOLISM_WP697	18	12	1.9447e-24	5.26285e-22	CYP1B1:UGT1A8:UGT1A9:UGT1A6:UGT1A3:UGT1A1:UGT2B7:SULT1E1:CYP3A4:CYP1A1:CYP1A2:SULT1A1:COMT	http://www.gsea-msigdb.org/gsea/msigdb/human/geneset/WP_ESTROGEN_METABOLISM_WP697
Curated_gene_sets	REACTOME_DECTIN_2_FAMILY	25	13	2.34208e-24	6.08473e-22	MUC1:MUC13:MUC20:MUC4:MUC7:MUC21:MUC12:MUC17:RN7SKP54:MUC6:MUC5AC:MUC5B:MUC15:MUC16	http://www.gsea-msigdb.org/gsea/msigdb/human/geneset/REACTOME_DECTIN_2_FAMILY
Curated_gene_sets	REACTOME_XENOBIOTICS	21	12	3.0417e-23	7.5984e-21	ARNT:AHR:CYP3A5:CYP3A4:CYP3A43:CYP2C18:CYP2C19:CYP2C9:CYP2C8:CYP2E1:CYP1A1:CYP1A2	http://www.gsea-msigdb.org/gsea/msigdb/human/geneset/REACTOME_XENOBIOTICS
Curated_gene_sets	WP_CONSTITUTIVE_ANDROSTANE_RECEPTOR_PATHWAY	30	13	5.28525e-23	1.2714e-20	UGT1A9:UGT1A6:UGT1A4:UGT1A1:ABCB1:CYP3A5:CYP3A4:CYP2C19:CYP2C9:ABCC2:SULT1A1:ABCC3:SULT2A1	http://www.gsea-msigdb.org/gsea/msigdb/human/geneset/WP_CONSTITUTIVE_ANDROSTANE_RECEPTOR_PATHWAY
Curated_gene_sets	WP_ESTROGEN_METABOLISM_WP5276	22	12	6.66453e-23	1.54593e-20	CYP1B1:UGT1A10:UGT2B7:UGT2A2:SULT1E1:CYP3A5:CYP3A4:CYP2C19:CYP2C9:CYP2C8:CYP1A2:COMT	http://www.gsea-msigdb.org/gsea/msigdb/human/geneset/WP_ESTROGEN_METABOLISM_WP5276
Curated_gene_sets	WP_PREGNANE_X_RECEPTOR_PATHWAY	31	13	9.06549e-23	2.03036e-20	UGT1A9:UGT1A6:UGT1A4:UGT1A1:ABCB1:CYP3A5:CYP3A4:CYP2C19:CYP2C9:ABCC2:ABCC4:ABCC3:SULT2A1	http://www.gsea-msigdb.org/gsea/msigdb/human/geneset/WP_PREGNANE_X_RECEPTOR_PATHWAY
Curated_gene_sets	REACTOME_PHASE_I_FUNCTIONALIZATION_OF_COMPOUNDS	99	16	3.09744e-20	6.70595e-18	ARNT:FMO3:FMO2:FMO1:CYP1B1:AHR:CYP3A5:CYP3A4:CYP3A43:CYP2C18:CYP2C19:CYP2C9:CYP2C8:CYP2E1:CYP1A1:CYP1A2	http://www.gsea-msigdb.org/gsea/msigdb/human/geneset/REACTOME_PHASE_I_FUNCTIONALIZATION_OF_COMPOUNDS
Curated_gene_sets	REACTOME_O_LINKED_GLYCOSYLATION_OF_MUCINS	59	13	1.58767e-18	3.32643e-16	MUC1:MUC13:MUC20:MUC4:MUC7:MUC21:MUC12:MUC17:RN7SKP54:MUC6:MUC5AC:MUC5B:MUC15:MUC16	http://www.gsea-msigdb.org/gsea/msigdb/human/geneset/REACTOME_O_LINKED_GLYCOSYLATION_OF_MUCINS
Curated_gene_sets	REACTOME_CYTOCHROME_P450_ARRANGED_BY_SUBSTRATE_TYPE	60	13	2.0186e-18	4.09712e-16	ARNT:CYP1B1:AHR:CYP3A5:CYP3A4:CYP3A43:CYP2C18:CYP2C19:CYP2C9:CYP2C8:CYP2E1:CYP1A1:CYP1A2	http://www.gsea-msigdb.org/gsea/msigdb/human/geneset/REACTOME_CYTOCHROME_P450_ARRANGED_BY_SUBSTRATE_TYPE
Curated_gene_sets	WP_ARYL_HYDROCARBON_RECEPTOR_PATHWAY_WP2873	45	12	2.69887e-18	5.31187e-16	ARNT:CYP1B1:NFE2L2:UGT1A9:UGT1A7:UGT1A6:UGT1A4:UGT1A1:AHR:CDKN1B:CYP1A1:CYP1A2	http://www.gsea-msigdb.org/gsea/msigdb/human/geneset/WP_ARYL_HYDROCARBON_RECEPTOR_PATHWAY_WP2873
Curated_gene_sets	NABA_ECM_AFFILIATED	162	17	3.90644e-18	7.46246e-16	OVGP1:MUC1:MUC13:MUC20:MUC4:MUC7:EMCN:MUC21:MUC12:MUC17:RN7SKP54:MUC6:MUC2:MUC5AC:MUC5B:MUC15:MUC19:MUC16	http://www.gsea-msigdb.org/gsea/msigdb/human/geneset/NABA_ECM_AFFILIATED
Curated_gene_sets	REACTOME_DISEASES_ASSOCIATED_WITH_O_GLYCOSYLATION_OF_PROTEINS	64	13	5.04957e-18	9.37056e-16	MUC1:MUC13:MUC20:MUC4:MUC7:MUC21:MUC12:MUC17:RN7SKP54:MUC6:MUC5AC:MUC5B:MUC15:MUC16	http://www.gsea-msigdb.org/gsea/msigdb/human/geneset/REACTOME_DISEASES_ASSOCIATED_WITH_O_GLYCOSYLATION_OF_PROTEINS
Curated_gene_sets	REACTOME_DISEASES_OF_METABOLISM	240	19	7.86176e-18	1.41839e-15	MUC1:FMO3:CYP1B1:LCT:UGT1A4:UGT1A1:MUC13:MUC20:MUC4:MUC7:MUC21:GUSB:MUC12:MUC17:RN7SKP54:MUC6:MUC5AC:MUC5B:MUC15:MUC16	http://www.gsea-msigdb.org/gsea/msigdb/human/geneset/REACTOME_DISEASES_OF_METABOLISM
Curated_gene_sets	WP_SULFATION_BIOTRANSFORMATION_REACTION	16	9	1.32133e-17	2.31947e-15	SULT1C2:SULT1C4:SULT1B1:SULT1E1:SULT1A2:SULT1A1:SULT2A1:SULT2B1:SULT4A1	http://www.gsea-msigdb.org/gsea/msigdb/human/geneset/WP_SULFATION_BIOTRANSFORMATION_REACTION
Curated_gene_sets	WP_IRINOTECAN_PATHWAY	11	8	4.24009e-17	7.24721e-15	UGT1A10:UGT1A9:UGT1A1:ABCG2:CYP3A5:CYP3A4:ABCC2:ABCC1	http://www.gsea-msigdb.org/gsea/msigdb/human/geneset/WP_IRINOTECAN_PATHWAY
Curated_gene_sets	REACTOME_CYTOSOLIC_SULFONATION_OF_SMALL_MOLECULES	21	9	3.32631e-16	5.53959e-14	SULT1C2:SULT1C4:SULT1B1:SULT1E1:SULT1A2:SULT1A1:SULT2A1:SULT2B1:SULT4A1	http://www.gsea-msigdb.org/gsea/msigdb/human/geneset/REACTOME_CYTOSOLIC_SULFONATION_OF_SMALL_MOLECULES
Curated_gene_sets	WP_OXIDATION_BY_CYTOCHROME_P450	58	11	4.53746e-15	7.1963e-13	CYP1B1:CYP3A5:CYP3A4:CYP3A43:CYP2C18:CYP2C19:CYP2C9:CYP2C8:CYP2E1:CYP1A1:CYP1A2	http://www.gsea-msigdb.org/gsea/msigdb/human/geneset/WP_OXIDATION_BY_CYTOCHROME_P450
Curated_gene_sets	REACTOME_O_LINKED_GLYCOSYLATION	105	13	4.5427e-15	7.1963e-13	MUC1:MUC13:MUC20:MUC4:MUC7:MUC21:MUC12:MUC17:RN7SKP54:MUC6:MUC5AC:MUC5B:MUC15:MUC16	http://www.gsea-msigdb.org/gsea/msigdb/human/geneset/REACTOME_O_LINKED_GLYCOSYLATION
Curated_gene_sets	KEGG_LINOLEIC_ACID_METABOLISM	27	9	5.17557e-15	8.00365e-13	CYP3A5:CYP3A4:CYP3A43:CYP2C18:CYP2C19:CYP2C9:CYP2C8:CYP2E1:CYP1A2	http://www.gsea-msigdb.org/gsea/msigdb/human/geneset/KEGG_LINOLEIC_ACID_METABOLISM
Curated_gene_sets	REACTOME_C_TYPE_LECTIN_RECEPTORS_CLRS	133	13	1.03663e-13	1.5658e-11	MUC1:MUC13:MUC20:MUC4:MUC7:MUC21:MUC12:MUC17:RN7SKP54:MUC6:MUC5AC:MUC5B:MUC15:MUC16	http://www.gsea-msigdb.org/gsea/msigdb/human/geneset/REACTOME_C_TYPE_LECTIN_RECEPTORS_CLRS
Curated_gene_sets	WP_NRF2_PATHWAY	135	13	1.26004e-13	1.85999e-11	NFE2L2:UGT1A9:UGT1A7:UGT1A6:UGT1A4:UGT1A1:SLC2A2:ABCC5:UGT2B7:ABCC2:ABCC4:ABCC3:SLC5A1	http://www.gsea-msigdb.org/gsea/msigdb/human/geneset/WP_NRF2_PATHWAY
Curated_gene_sets	WP_PROXIMAL_TUBULE_TRANSPORT	55	10	1.30952e-13	1.89008e-11	SLC2A2:ABCG2:SLC22A7:ABCB1:ABCC2:SLC22A6:SLC22A8:SLC22A11:ABCC4:SLC5A1	http://www.gsea-msigdb.org/gsea/msigdb/human/geneset/WP_PROXIMAL_TUBULE_TRANSPORT
Curated_gene_sets	REACTOME_DISEASES_OF_GLYCOSYLATION	137	13	1.5268e-13	2.15578e-11	MUC1:MUC13:MUC20:MUC4:MUC7:MUC21:MUC12:MUC17:RN7SKP54:MUC6:MUC5AC:MUC5B:MUC15:MUC16	http://www.gsea-msigdb.org/gsea/msigdb/human/geneset/REACTOME_DISEASES_OF_GLYCOSYLATION
Curated_gene_sets	REACTOME_SYNTHESIS_OF_16_20_HYDROXYEICOSATETRAENOIC_ACIDS_HETE	8	6	3.37033e-13	4.56048e-11	CYP1B1:CYP2C19:CYP2C9:CYP2C8:CYP1A1:CYP1A2	http://www.gsea-msigdb.org/gsea/msigdb/human/geneset/REACTOME_SYNTHESIS_OF_16_20_HYDROXYEICOSATETRAENOIC_ACIDS_HETE
Curated_gene_sets	REACTOME_SYNTHESIS_OF_EPOXY_EET_AND_DIHYDROXYEICOSATRIENOIC_ACIDS_DHET	8	6	3.37033e-13	4.56048e-11	CYP1B1:CYP2C19:CYP2C9:CYP2C8:CYP1A1:CYP1A2	http://www.gsea-msigdb.org/gsea/msigdb/human/geneset/REACTOME_SYNTHESIS_OF_EPOXY_EET_AND_DIHYDROXYEICOSATRIENOIC_ACIDS_DHET
Curated_gene_sets	YAMASHITA_LIVER_CANCER_STEM_CELL_DN	73	10	2.58446e-12	3.23017e-10	FMO3:FMO4:SULT1C2:UGT2B15:UGT2B7:ABCB1:CYP3A4:CYP2C8:CYP1A2:SULT2A1	http://www.gsea-msigdb.org/gsea/msigdb/human/geneset/YAMASHITA_LIVER_CANCER_STEM_CELL_DN
Curated_gene_sets	REACTOME_BIOSYNTHESIS_OF_MARESIN_LIKE_SPMS	5	5	2.58613e-12	3.23017e-10	CYP3A4:CYP2C9:CYP2C8:CYP2E1:CYP1A2	http://www.gsea-msigdb.org/gsea/msigdb/human/geneset/REACTOME_BIOSYNTHESIS_OF_MARESIN_LIKE_SPMS
Curated_gene_sets	REACTOME_ORGANIC_ANION_TRANSPORT	5	5	2.58613e-12	3.23017e-10	SLC22A7:SLC22A6:SLC22A8:SLC22A11:SLC22A12	http://www.gsea-msigdb.org/gsea/msigdb/human/geneset/REACTOME_ORGANIC_ANION_TRANSPORT
Curated_gene_sets	WP_CATALYTIC_CYCLE_OF_MAMMALIAN_FLAVINCONTAINING_MONOOXYGENASES_FMOS	5	5	2.58613e-12	3.23017e-10	FMO5:FMO3:FMO2:FMO1:FMO4	http://www.gsea-msigdb.org/gsea/msigdb/human/geneset/WP_CATALYTIC_CYCLE_OF_MAMMALIAN_FLAVINCONTAINING_MONOOXYGENASES_FMOS
Curated_gene_sets	BIOCARTA_NUCLEARRS_PATHWAY	33	8	3.2624e-12	3.99797e-10	ABCD3:ABCB1:CYP3A4:CYP2C9:ABCC2:CYP2E1:CYP1A2:ABCC3	http://www.gsea-msigdb.org/gsea/msigdb/human/geneset/BIOCARTA_NUCLEARRS_PATHWAY
Curated_gene_sets	CARRILLOREIXACH_HEPATOBLASTOMA_VS_NORMAL_DN	1110	27	3.4534e-12	4.15367e-10	FMO3:FMO4:UGT1A9:UGT1A7:UGT1A6:UGT1A4:GBA3:UGT2B15:UGT2B7:UGT2A1:UGT2A1:ABCG2:SLC22A7:CYP3A4:CYP3A43:CYP2C18:CYP2C19:CYP2C8:MUC6:SLC22A10:CYP1A1:CYP1A2:SULT1A2:SULT1A1:ABCC3:SULT2A1:SLC5A1:SLC16A2	http://www.gsea-msigdb.org/gsea/msigdb/human/geneset/CARRILLOREIXACH_HEPATOBLASTOMA_VS_NORMAL_DN
Curated_gene_sets	WP_NUCLEAR_RECEPTORS_IN_LIPID_METABOLISM_AND_TOXICITY	34	8	4.24889e-12	5.01755e-10	ABCD3:ABCB1:CYP3A4:CYP2C9:ABCC2:CYP2E1:CYP1A2:ABCC3	http://www.gsea-msigdb.org/gsea/msigdb/human/geneset/WP_NUCLEAR_RECEPTORS_IN_LIPID_METABOLISM_AND_TOXICITY
Curated_gene_sets	WP_ARYLAMINE_METABOLISM	6	5	1.54561e-11	1.79263e-09	UGT1A9:UGT1A4:CYP1A2:SULT1A2:SULT1A1	http://www.gsea-msigdb.org/gsea/msigdb/human/geneset/WP_ARYLAMINE_METABOLISM
Curated_gene_sets	REACTOME_ORGANIC_CATION_ANION_ZWITTERION_TRANSPORT	13	6	2.0247e-11	2.30709e-09	SLC22A5:SLC22A7:SLC22A6:SLC22A8:SLC22A11:SLC22A12	http://www.gsea-msigdb.org/gsea/msigdb/human/geneset/REACTOME_ORGANIC_CATION_ANION_ZWITTERION_TRANSPORT
Curated_gene_sets	REACTOME_TRANSPORT_OF_SMALL_MOLECULES	704	21	3.01666e-11	3.37814e-09	ABCD3:SLC16A1:SLC2A2:ABCC5:ABCG2:SLC22A5:SLC22A7:ABCB1:ABCC2:KCNJ11:SLC22A6:SLC22A8:SLC22A11:SLC22A12:SLC16A7:ABCC4:ABCC1:ABCC3:SLC5A1:SLC16A8:SLC16A2	http://www.gsea-msigdb.org/gsea/msigdb/human/geneset/REACTOME_TRANSPORT_OF_SMALL_MOLECULES
Curated_gene_sets	KEGG_ABC_TRANSPORTERS	43	8	3.27148e-11	3.60141e-09	ABCD3:ABCC5:ABCG2:ABCB1:ABCC2:ABCC4:ABCC1:ABCC3	http://www.gsea-msigdb.org/gsea/msigdb/human/geneset/KEGG_ABC_TRANSPORTERS
Curated_gene_sets	REACTOME_BIOSYNTHESIS_OF_MARESINS	7	5	5.38849e-11	5.83304e-09	CYP3A4:CYP2C9:CYP2C8:CYP2E1:CYP1A2	http://www.gsea-msigdb.org/gsea/msigdb/human/geneset/REACTOME_BIOSYNTHESIS_OF_MARESINS
Curated_gene_sets	HSIAO_LIVER_SPECIFIC_GENES	233	13	1.31632e-10	1.40155e-08	FMO5:FMO3:UGT1A10:SLC2A2:UGT2B15:UGT2B7:UGT2B4:CYP3A4:CYP2C18:CYP2C9:ABCC2:CYP2E1:SULT2A1	http://www.gsea-msigdb.org/gsea/msigdb/human/geneset/HSIAO_LIVER_SPECIFIC_GENES
Curated_gene_sets	WP_DRUG_INDUCTION_OF_BILE_ACID_PATHWAY	17	6	1.4371e-10	1.48158e-08	ABCB1:CYP3A4:ABCC2:ABCC4:ABCC3:SULT2A1	http://www.gsea-msigdb.org/gsea/msigdb/human/geneset/WP_DRUG_INDUCTION_OF_BILE_ACID_PATHWAY
Curated_gene_sets	REACTOME_BIOSYNTHESIS_OF_SPECIALIZED_PRORESOLVING_MEDIATORS_SPMS	17	6	1.4371e-10	1.48158e-08	CYP3A4:CYP2C9:CYP2C8:CYP2E1:CYP1A1:CYP1A2	http://www.gsea-msigdb.org/gsea/msigdb/human/geneset/REACTOME_BIOSYNTHESIS_OF_SPECIALIZED_PRORESOLVING_MEDIATORS_SPMS
Curated_gene_sets	REACTOME_TRANSPORT_OF_BILE_SALTS_AND_ORGANIC_ACIDS_METAL_IONS_AND_AMINE_COMPOUNDS	80	9	2.06257e-10	2.09319e-08	SLC16A1:SLC22A5:SLC22A7:SLC22A6:SLC22A8:SLC22A11:SLC22A12:SLC16A7:SLC16A8	http://www.gsea-msigdb.org/gsea/msigdb/human/geneset/REACTOME_TRANSPORT_OF_BILE_SALTS_AND_ORGANIC_ACIDS_METAL_IONS_AND_AMINE_COMPOUNDS
Curated_gene_sets	VECCHI_GASTRIC_CANCER_EARLY_DN	359	15	2.6812e-10	2.67914e-08	FMO5:CYP1B1:SLC2A2:UGT2B17:UGT2B15:UGT2B11:SULT1B1:SULT1E1:CYP3A4:CYP2C18:CYP2C19:CYP2C9:LDHB:SLC16A7:SULT2A1	http://www.gsea-msigdb.org/gsea/msigdb/human/geneset/VECCHI_GASTRIC_CANCER_EARLY_DN
Curated_gene_sets	NABA_MATRISOME_ASSOCIATED	727	20	3.88407e-10	3.82228e-08	OVGP1:MUC1:MUC13:MUC20:MUC4:MUC7:EMCN:MUC21:MUC12:MUC17:RN7SKP54:SULF1:MUC6:MUC2:MUC5AC:MUC5B:MUC15:MUC19:CCL2:MUC16:SULF2	http://www.gsea-msigdb.org/gsea/msigdb/human/geneset/NABA_MATRISOME_ASSOCIATED
Curated_gene_sets	REACTOME_PREDNISONE_ADME	10	5	6.39065e-10	6.19512e-08	UGT1A8:UGT1A3:UGT2B17:UGT2B7:ABCB1:CYP3A4	http://www.gsea-msigdb.org/gsea/msigdb/human/geneset/REACTOME_PREDNISONE_ADME
Curated_gene_sets	FLECHNER_BIOPSY_KIDNEY_TRANSPLANT_REJECTED_VS_OK_DN	529	17	9.01022e-10	8.60608e-08	AKR7A2:ABCD3:SLC16A4:FMO1:SULT1C2:ITGA6:UGT1A10:UGT2B15:UGT2B7:UGT8:ABCB1:CYP3A5:ABCC2:SLC22A6:SLC16A7:ABCC4:COMT	http://www.gsea-msigdb.org/gsea/msigdb/human/geneset/FLECHNER_BIOPSY_KIDNEY_TRANSPLANT_REJECTED_VS_OK_DN
Curated_gene_sets	CHIANG_LIVER_CANCER_SUBCLASS_PROLIFERATION_DN	174	11	9.96129e-10	9.37661e-08	FMO3:FMO4:UGT1A10:SLC2A2:SULT1B1:CYP3A43:CYP2C9:CYP2C8:CYP1A2:SULT2A1:SLC16A2	http://www.gsea-msigdb.org/gsea/msigdb/human/geneset/CHIANG_LIVER_CANCER_SUBCLASS_PROLIFERATION_DN
Curated_gene_sets	WP_ARYL_HYDROCARBON_RECEPTOR_PATHWAY_WP2586	45	7	2.19636e-09	2.03791e-07	ARNT:CYP1B1:NFE2L2:AHR:CDKN1B:CYP1A1:CYP1A2	http://www.gsea-msigdb.org/gsea/msigdb/human/geneset/WP_ARYL_HYDROCARBON_RECEPTOR_PATHWAY_WP2586
Curated_gene_sets	REACTOME_SLC_MEDIATED_TRANSMEMBRANE_TRANSPORT	239	12	2.32853e-09	2.13012e-07	SLC16A1:SLC2A2:SLC22A5:SLC22A7:SLC22A6:SLC22A8:SLC22A11:SLC22A12:SLC16A7:SLC5A1:SLC16A8:SLC16A2	http://www.gsea-msigdb.org/gsea/msigdb/human/geneset/REACTOME_SLC_MEDIATED_TRANSMEMBRANE_TRANSPORT
Curated_gene_sets	REACTOME_PYRUVATE_METABOLISM	30	6	6.5463e-09	5.90531e-07	SLC16A1:LDHA:LDHB:SLC16A8:PDHA1:PDK3	http://www.gsea-msigdb.org/gsea/msigdb/human/geneset/REACTOME_PYRUVATE_METABOLISM
Curated_gene_sets	REACTOME_HEME_DEGRADATION	15	5	7.46789e-09	6.64438e-07	UGT1A4:UGT1A1:ABCG2:ABCC2:ABCC1	http://www.gsea-msigdb.org/gsea/msigdb/human/geneset/REACTOME_HEME_DEGRADATION
Curated_gene_sets	REACTOME_ARACHIDONIC_ACID_METABOLISM	55	7	9.43308e-09	8.27944e-07	CYP1B1:CYP2C19:CYP2C9:CYP2C8:CYP1A1:CYP1A2:ABCC1	http://www.gsea-msigdb.org/gsea/msigdb/human/geneset/REACTOME_ARACHIDONIC_ACID_METABOLISM
Curated_gene_sets	REACTOME_ABC_FAMILY_PROTEINS_MEDIATED_TRANSPORT	101	8	3.60165e-08	3.11903e-06	ABCD3:ABCC5:ABCB1:ABCC2:KCNJ11:ABCC4:ABCC1:ABCC3	http://www.gsea-msigdb.org/gsea/msigdb/human/geneset/REACTOME_ABC_FAMILY_PROTEINS_MEDIATED_TRANSPORT
Curated_gene_sets	WP_PHOTODYNAMIC_THERAPYINDUCED_NFE2L2_NRF2_SURVIVAL_SIGNALING	21	5	4.94297e-08	4.22428e-06	NFE2L2:ABCG2:ABCC2:ABCC4:ABCC3	http://www.gsea-msigdb.org/gsea/msigdb/human/geneset/WP_PHOTODYNAMIC_THERAPYINDUCED_NFE2L2_NRF2_SURVIVAL_SIGNALING
Curated_gene_sets	REACTOME_ATORVASTATIN_ADME	9	4	6.75579e-08	5.69855e-06	UGT1A8:UGT1A3:ABCB1:CYP3A4:ABCC2	http://www.gsea-msigdb.org/gsea/msigdb/human/geneset/REACTOME_ATORVASTATIN_ADME
Curated_gene_sets	NABA_MATRISOME	993	20	7.37831e-08	6.14386e-06	OVGP1:MUC1:MUC13:MUC20:MUC4:MUC7:EMCN:MUC21:MUC12:MUC17:RN7SKP54:SULF1:MUC6:MUC2:MUC5AC:MUC5B:MUC15:MUC19:CCL2:MUC16:SULF2	http://www.gsea-msigdb.org/gsea/msigdb/human/geneset/NABA_MATRISOME
Curated_gene_sets	REACTOME_CYP2E1_REACTIONS	10	4	1.1217e-07	9.22211e-06	CYP2C19:CYP2C9:CYP2C8:CYP2E1	http://www.gsea-msigdb.org/gsea/msigdb/human/geneset/REACTOME_CYP2E1_REACTIONS
Curated_gene_sets	OHGUCHI_LIVER_HNF4A_TARGETS_UP	48	6	1.2592e-07	1.02232e-05	FMO3:SULT1E1:ABCB1:SLC22A9:SLC16A7:SULT2A1	http://www.gsea-msigdb.org/gsea/msigdb/human/geneset/OHGUCHI_LIVER_HNF4A_TARGETS_UP
Curated_gene_sets	RICKMAN_HEAD_AND_NECK_CANCER_E	83	7	1.72386e-07	1.38228e-05	FMO3:FMO2:UGT1A10:MUC20:MUC4:CYP2C18:CYP2E1	http://www.gsea-msigdb.org/gsea/msigdb/human/geneset/RICKMAN_HEAD_AND_NECK_CANCER_E
Curated_gene_sets	KEGG_SULFUR_METABOLISM	11	4	1.75601e-07	1.39089e-05	SULT1E1:SULT1A2:SULT1A1:SULT2B1	http://www.gsea-msigdb.org/gsea/msigdb/human/geneset/KEGG_SULFUR_METABOLISM
Curated_gene_sets	REACTOME_METABOLISM_OF_PORPHYRINS	27	5	1.91552e-07	1.49895e-05	UGT1A4:UGT1A1:ABCG2:ABCC2:ABCC1	http://www.gsea-msigdb.org/gsea/msigdb/human/geneset/REACTOME_METABOLISM_OF_PORPHYRINS
Curated_gene_sets	WP_VITAMIN_D_RECEPTOR_PATHWAY	178	9	2.39987e-07	1.85562e-05	SULT1C2:ABCB1:CYP3A5:CYP3A4:CYP2C9:CDKN1B:HIF1A:CYP1A1:SULT2A1	http://www.gsea-msigdb.org/gsea/msigdb/human/geneset/WP_VITAMIN_D_RECEPTOR_PATHWAY
Curated_gene_sets	REACTOME_PYRUVATE_METABOLISM_AND_CITRIC_ACID_TCA_CYCLE	54	6	2.58755e-07	1.9772e-05	SLC16A1:LDHA:LDHB:SLC16A8:PDHA1:PDK3	http://www.gsea-msigdb.org/gsea/msigdb/human/geneset/REACTOME_PYRUVATE_METABOLISM_AND_CITRIC_ACID_TCA_CYCLE
Curated_gene_sets	WP_CANNABINOID_RECEPTOR_SIGNALING	29	5	2.7958e-07	2.11148e-05	AHR:CYP3A4:CYP2C19:CYP2C9:CYP1A1	http://www.gsea-msigdb.org/gsea/msigdb/human/geneset/WP_CANNABINOID_RECEPTOR_SIGNALING
Curated_gene_sets	SAENZ_DETOX_PATHWAY_AND_CARCINOGENESIS_DN	13	4	3.77596e-07	2.78691e-05	CYP3A5:CYP2C19:CYP2C8:ABCC2	http://www.gsea-msigdb.org/gsea/msigdb/human/geneset/SAENZ_DETOX_PATHWAY_AND_CARCINOGENESIS_DN
Curated_gene_sets	WP_FATTY_ACID_OMEGAOXIDATION	13	4	3.77596e-07	2.78691e-05	CYP3A4:CYP2E1:CYP1A1:CYP1A2	http://www.gsea-msigdb.org/gsea/msigdb/human/geneset/WP_FATTY_ACID_OMEGAOXIDATION
Curated_gene_sets	WP_FLUOROPYRIMIDINE_ACTIVITY	31	5	3.96899e-07	2.89647e-05	ABCC5:ABCG2:SLC22A7:ABCC4:ABCC3	http://www.gsea-msigdb.org/gsea/msigdb/human/geneset/WP_FLUOROPYRIMIDINE_ACTIVITY
Curated_gene_sets	REACTOME_METABOLISM_OF_LIPIDS	718	16	4.5387e-07	3.27543e-05	ARNT:CYP1B1:UGT1A9:UGT8:SLC22A5:AHR:CYP3A4:CYP2C19:CYP2C9:CYP2C8:CYP2E1:CYP1A1:CYP1A2:ABCC1:ABCC3:SULT2A1	http://www.gsea-msigdb.org/gsea/msigdb/human/geneset/REACTOME_METABOLISM_OF_LIPIDS
Curated_gene_sets	REACTOME_INNATE_IMMUNE_SYSTEM	1012	19	4.75439e-07	3.39338e-05	MUC1:TLR5:MYD88:MUC13:MUC20:MUC4:MUC7:TLR2:MUC21:GUSB:MUC12:MUC17:RN7SKP54:TLR4:MUC6:MUC5AC:MUC5B:MUC15:NOD2:MUC16	http://www.gsea-msigdb.org/gsea/msigdb/human/geneset/REACTOME_INNATE_IMMUNE_SYSTEM
Curated_gene_sets	YOSHIMURA_MAPK8_TARGETS_UP	1228	21	5.08324e-07	3.58865e-05	ARNT:MUC1:SULT1C2:LCT:UGT1A10:MUC13:UGT2B7:UGT2A1:UGT2A1:SULT1E1:SLC22A7:TLR4:CYP2C18:CYP2C8:CYP2E1:MUC2:KCNJ11:SLC22A9:CYP1A1:CCL2:SULT2A1:SLC5A1	http://www.gsea-msigdb.org/gsea/msigdb/human/geneset/YOSHIMURA_MAPK8_TARGETS_UP
Curated_gene_sets	WP_MELATONIN_METABOLISM_AND_EFFECTS	34	5	6.42406e-07	4.48648e-05	CYP1B1:CYP2C19:CYP1A1:CYP1A2:SULT1A1	http://www.gsea-msigdb.org/gsea/msigdb/human/geneset/WP_MELATONIN_METABOLISM_AND_EFFECTS
Curated_gene_sets	WP_BURN_WOUND_HEALING	105	7	8.64814e-07	5.93299e-05	TLR5:MYD88:TLR2:TLR4:AKT1:NOD2:CCL2	http://www.gsea-msigdb.org/gsea/msigdb/human/geneset/WP_BURN_WOUND_HEALING
Curated_gene_sets	PID_HIF1_TFPATHWAY	66	6	8.67797e-07	5.93299e-05	ARNT:ABCG2:ABCB1:LDHA:HIF1A:AKT1	http://www.gsea-msigdb.org/gsea/msigdb/human/geneset/PID_HIF1_TFPATHWAY
Curated_gene_sets	WP_PHOTODYNAMIC_THERAPYINDUCED_HIF1_SURVIVAL_SIGNALING	37	5	9.9462e-07	6.72923e-05	SLC16A1:ARNT:LDHA:HIF1A:PDHA1	http://www.gsea-msigdb.org/gsea/msigdb/human/geneset/WP_PHOTODYNAMIC_THERAPYINDUCED_HIF1_SURVIVAL_SIGNALING
Curated_gene_sets	REACTOME_PROTON_COUPLED_MONOCARBOXYLATE_TRANSPORT	5	3	1.13651e-06	7.60994e-05	SLC16A1:SLC16A7:SLC16A8	http://www.gsea-msigdb.org/gsea/msigdb/human/geneset/REACTOME_PROTON_COUPLED_MONOCARBOXYLATE_TRANSPORT
Curated_gene_sets	REACTOME_AFLATOXIN_ACTIVATION_AND_DETOXIFICATION	17	4	1.23799e-06	8.12196e-05	AKR7A2:CYP3A5:CYP3A4:CYP1A2	http://www.gsea-msigdb.org/gsea/msigdb/human/geneset/REACTOME_AFLATOXIN_ACTIVATION_AND_DETOXIFICATION
Curated_gene_sets	WP_MYD88_DISTINCT_INPUTOUTPUT_PATHWAY	17	4	1.23799e-06	8.12196e-05	TLR5:MYD88:TLR2:TLR4	http://www.gsea-msigdb.org/gsea/msigdb/human/geneset/WP_MYD88_DISTINCT_INPUTOUTPUT_PATHWAY
Curated_gene_sets	REACTOME_FATTY_ACID_METABOLISM	169	8	1.88604e-06	0.000122498	CYP1B1:SLC22A5:CYP2C19:CYP2C9:CYP2C8:CYP1A1:CYP1A2:ABCC1	http://www.gsea-msigdb.org/gsea/msigdb/human/geneset/REACTOME_FATTY_ACID_METABOLISM
Curated_gene_sets	WINTER_HYPOXIA_METAGENE	230	9	2.04318e-06	0.000131391	SLC16A1:MUC1:ABCB1:LDHA:CDKN1B:LDHB:HIF1A:PDK3:SLC16A2	http://www.gsea-msigdb.org/gsea/msigdb/human/geneset/WINTER_HYPOXIA_METAGENE
Curated_gene_sets	WOO_LIVER_CANCER_RECURRENCE_DN	77	6	2.16746e-06	0.000138016	FMO4:SLC2A2:SULT1B1:CYP3A43:CYP2E1:SULT2A1	http://www.gsea-msigdb.org/gsea/msigdb/human/geneset/WOO_LIVER_CANCER_RECURRENCE_DN
Curated_gene_sets	BIOCARTA_MRP_PATHWAY	6	3	2.26489e-06	0.000141447	ABCB1:ABCC1:ABCC3	http://www.gsea-msigdb.org/gsea/msigdb/human/geneset/BIOCARTA_MRP_PATHWAY
Curated_gene_sets	WP_NICOTINE_METABOLISM_IN_LIVER_CELLS	6	3	2.26489e-06	0.000141447	FMO3:UGT1A9:UGT1A4	http://www.gsea-msigdb.org/gsea/msigdb/human/geneset/WP_NICOTINE_METABOLISM_IN_LIVER_CELLS
Curated_gene_sets	WP_HEREDITARY_LEIOMYOMATOSIS_AND_RENAL_CELL_CARCINOMA_PATHWAY	20	4	2.49172e-06	0.000154131	NFE2L2:LDHA:HIF1A:PDHA1	http://www.gsea-msigdb.org/gsea/msigdb/human/geneset/WP_HEREDITARY_LEIOMYOMATOSIS_AND_RENAL_CELL_CARCINOMA_PATHWAY
Curated_gene_sets	LEE_LIVER_CANCER_SURVIVAL_UP	176	8	2.5537e-06	0.000156474	FMO3:UGT1A6:SLC2A2:UGT2B15:UGT2B4:CYP3A4:ABCC2:SULT2A1	http://www.gsea-msigdb.org/gsea/msigdb/human/geneset/LEE_LIVER_CANCER_SURVIVAL_UP
Curated_gene_sets	WP_AFLATOXIN_B1_METABOLISM	7	3	3.94937e-06	0.000239731	AKR7A2:CYP3A4:CYP1A2	http://www.gsea-msigdb.org/gsea/msigdb/human/geneset/WP_AFLATOXIN_B1_METABOLISM
Curated_gene_sets	SERVITJA_LIVER_HNF1A_TARGETS_UP	132	7	4.01641e-06	0.000241542	FMO3:SULT1E1:SLC22A5:ABCB1:CYP2C19:ABCC4:ABCC3	http://www.gsea-msigdb.org/gsea/msigdb/human/geneset/SERVITJA_LIVER_HNF1A_TARGETS_UP
Curated_gene_sets	WP_BENZOAPYRENE_METABOLISM	8	3	6.29639e-06	0.000375184	CYP1B1:CYP3A4:CYP1A1	http://www.gsea-msigdb.org/gsea/msigdb/human/geneset/WP_BENZOAPYRENE_METABOLISM
Curated_gene_sets	KEGG_ARACHIDONIC_ACID_METABOLISM	54	5	6.75265e-06	0.000398713	CYP2C18:CYP2C19:CYP2C9:CYP2C8:CYP2E1	http://www.gsea-msigdb.org/gsea/msigdb/human/geneset/KEGG_ARACHIDONIC_ACID_METABOLISM
Curated_gene_sets	MEBARKI_HCC_PROGENITOR_FZD8CRD_DN	424	11	7.80599e-06	0.000456472	SULT1C2:SLC2A2:MUC20:GBA3:UGT2A3:ABCB1:CYP3A5:CYP2C8:MUC15:SLC22A9:SULT2A1	http://www.gsea-msigdb.org/gsea/msigdb/human/geneset/MEBARKI_HCC_PROGENITOR_FZD8CRD_DN
Curated_gene_sets	CAIRO_HEPATOBLASTOMA_CLASSES_DN	205	8	7.87142e-06	0.000456472	FMO3:FMO4:UGT2B4:SULT1B1:EMCN:CYP2C9:CYP2E1:CYP1A1	http://www.gsea-msigdb.org/gsea/msigdb/human/geneset/CAIRO_HEPATOBLASTOMA_CLASSES_DN
Curated_gene_sets	WP_TOLLLIKE_RECEPTOR_SIGNALING_RELATED_TO_MYD88	30	4	1.35708e-05	0.000780019	TLR5:MYD88:TLR2:TLR4	http://www.gsea-msigdb.org/gsea/msigdb/human/geneset/WP_TOLLLIKE_RECEPTOR_SIGNALING_RELATED_TO_MYD88
Curated_gene_sets	SERVITJA_LIVER_HNF1A_TARGETS_DN	162	7	1.53882e-05	0.000876681	FMO5:UGT2B17:UGT2A3:UGT2B7:UGT2B28:SLC22A7:CYP2C19	http://www.gsea-msigdb.org/gsea/msigdb/human/geneset/SERVITJA_LIVER_HNF1A_TARGETS_DN
Curated_gene_sets	REACTOME_DISEASES_OF_IMMUNE_SYSTEM	31	4	1.55224e-05	0.000876681	TLR5:MYD88:TLR2:TLR4	http://www.gsea-msigdb.org/gsea/msigdb/human/geneset/REACTOME_DISEASES_OF_IMMUNE_SYSTEM
Curated_gene_sets	REACTOME_METABOLIC_DISORDERS_OF_BIOLOGICAL_OXIDATION_ENZYMES	33	4	2.00348e-05	0.00112178	FMO3:CYP1B1:UGT1A4:UGT1A1	http://www.gsea-msigdb.org/gsea/msigdb/human/geneset/REACTOME_METABOLIC_DISORDERS_OF_BIOLOGICAL_OXIDATION_ENZYMES
Curated_gene_sets	CHIANG_LIVER_CANCER_SUBCLASS_CTNNB1_UP	171	7	2.18214e-05	0.00121137	SLC16A4:SLC16A1:SULT1B1:ABCG2:CYP2E1:SLC22A11:CYP1A1	http://www.gsea-msigdb.org/gsea/msigdb/human/geneset/CHIANG_LIVER_CANCER_SUBCLASS_CTNNB1_UP
Curated_gene_sets	REACTOME_DISORDERS_OF_TRANSMEMBRANE_TRANSPORTERS	175	7	2.53188e-05	0.00139361	SLC16A1:SLC2A2:SLC22A5:ABCC2:KCNJ11:SLC22A12:SLC5A1	http://www.gsea-msigdb.org/gsea/msigdb/human/geneset/REACTOME_DISORDERS_OF_TRANSMEMBRANE_TRANSPORTERS
Curated_gene_sets	WP_ESTROGEN_RECEPTOR_PATHWAY	13	3	3.15859e-05	0.00172395	CYP1B1:CYP1A1:CYP1A2	http://www.gsea-msigdb.org/gsea/msigdb/human/geneset/WP_ESTROGEN_RECEPTOR_PATHWAY
Curated_gene_sets	OISHI_CHOLANGIOMA_STEM_CELL_LIKE_DN	264	8	4.83701e-05	0.00261803	MUC1:FMO2:CYP1B1:MYD88:SULT1B1:SULT1E1:AHR:MUC5B	http://www.gsea-msigdb.org/gsea/msigdb/human/geneset/OISHI_CHOLANGIOMA_STEM_CELL_LIKE_DN
Curated_gene_sets	BIOCARTA_HIF_PATHWAY	15	3	4.98918e-05	0.00267808	ARNT:LDHA:HIF1A	http://www.gsea-msigdb.org/gsea/msigdb/human/geneset/BIOCARTA_HIF_PATHWAY
Curated_gene_sets	WP_FIBRIN_COMPLEMENT_RECEPTOR_3_SIGNALING_PATHWAY	42	4	5.29701e-05	0.00279708	MYD88:TLR4:AKT1:CCL2	http://www.gsea-msigdb.org/gsea/msigdb/human/geneset/WP_FIBRIN_COMPLEMENT_RECEPTOR_3_SIGNALING_PATHWAY
Curated_gene_sets	WP_METABOLIC_REPROGRAMMING_IN_PANCREATIC_CANCER	42	4	5.29701e-05	0.00279708	SLC16A4:SLC16A1:LDHA:PDHA1	http://www.gsea-msigdb.org/gsea/msigdb/human/geneset/WP_METABOLIC_REPROGRAMMING_IN_PANCREATIC_CANCER
Curated_gene_sets	WP_INFLAMMATORY_BOWEL_DISEASE_SIGNALING	43	4	5.81829e-05	0.00304718	TLR5:TLR2:TLR4:NOD2	http://www.gsea-msigdb.org/gsea/msigdb/human/geneset/WP_INFLAMMATORY_BOWEL_DISEASE_SIGNALING
Curated_gene_sets	WP_CLEAR_CELL_RENAL_CELL_CARCINOMA_PATHWAYS	84	5	5.86447e-05	0.00304718	ARNT:LDHA:LDHB:HIF1A:AKT1	http://www.gsea-msigdb.org/gsea/msigdb/human/geneset/WP_CLEAR_CELL_RENAL_CELL_CARCINOMA_PATHWAYS
Curated_gene_sets	SMID_BREAST_CANCER_LUMINAL_B_DN	536	11	6.6853e-05	0.00344611	SLC16A1:FMO2:CYP1B1:ITGA6:EMCN:UGT8:ABCC2:LDHB:ABCC4:CCL2:MUC16	http://www.gsea-msigdb.org/gsea/msigdb/human/geneset/SMID_BREAST_CANCER_LUMINAL_B_DN
Curated_gene_sets	WP_2Q37_COPY_NUMBER_VARIATION_SYNDROME	141	6	6.94646e-05	0.00351017	UGT1A10:UGT1A9:UGT1A7:UGT1A6:UGT1A4:UGT1A1	http://www.gsea-msigdb.org/gsea/msigdb/human/geneset/WP_2Q37_COPY_NUMBER_VARIATION_SYNDROME
Curated_gene_sets	ENGELMANN_CANCER_PROGENITORS_UP	45	4	6.97169e-05	0.00351017	NFE2L2:ABCG2:CYP1A1:SULT1A1	http://www.gsea-msigdb.org/gsea/msigdb/human/geneset/ENGELMANN_CANCER_PROGENITORS_UP
Curated_gene_sets	WP_GLYCOLYSIS_AND_GLUCONEOGENESIS	45	4	6.97169e-05	0.00351017	SLC2A2:LDHA:LDHB:PDHA1	http://www.gsea-msigdb.org/gsea/msigdb/human/geneset/WP_GLYCOLYSIS_AND_GLUCONEOGENESIS
Curated_gene_sets	WP_PLATELETMEDIATED_INTERACTIONS_WITH_VASCULAR_AND_CIRCULATING_CELLS	17	3	7.4032e-05	0.00369876	TLR2:TLR4:CCL2	http://www.gsea-msigdb.org/gsea/msigdb/human/geneset/WP_PLATELETMEDIATED_INTERACTIONS_WITH_VASCULAR_AND_CIRCULATING_CELLS
Curated_gene_sets	TUOMISTO_TUMOR_SUPPRESSION_BY_COL13A1_DN	18	3	8.85213e-05	0.00435565	CYP2C19:CYP2E1:CYP1A1	http://www.gsea-msigdb.org/gsea/msigdb/human/geneset/TUOMISTO_TUMOR_SUPPRESSION_BY_COL13A1_DN
Curated_gene_sets	REACTOME_IRAK4_DEFICIENCY_TLR2_4	18	3	8.85213e-05	0.00435565	MYD88:TLR2:TLR4	http://www.gsea-msigdb.org/gsea/msigdb/human/geneset/REACTOME_IRAK4_DEFICIENCY_TLR2_4
Curated_gene_sets	DESERT_PERIVENOUS_HEPATOCELLULAR_CARCINOMA_SUBCLASS_UP	150	6	9.78009e-05	0.00477607	FMO3:CYP3A4:CYP2E1:CYP1A1:CYP1A2:SULT2A1	http://www.gsea-msigdb.org/gsea/msigdb/human/geneset/DESERT_PERIVENOUS_HEPATOCELLULAR_CARCINOMA_SUBCLASS_UP
Curated_gene_sets	WP_LTF_DANGER_SIGNAL_RESPONSE_PATHWAY	19	3	0.000104744	0.00496578	MYD88:TLR2:TLR4	http://www.gsea-msigdb.org/gsea/msigdb/human/geneset/WP_LTF_DANGER_SIGNAL_RESPONSE_PATHWAY
Curated_gene_sets	BANDRES_RESPONSE_TO_CARMUSTIN_MGMT_48HR_UP	19	3	0.000104744	0.00496578	UGT8:CCL2:SLC16A2	http://www.gsea-msigdb.org/gsea/msigdb/human/geneset/BANDRES_RESPONSE_TO_CARMUSTIN_MGMT_48HR_UP
Curated_gene_sets	WP_FARNESOID_X_RECEPTOR_PATHWAY	19	3	0.000104744	0.00496578	UGT2B4:CYP3A4:SULT2A1	http://www.gsea-msigdb.org/gsea/msigdb/human/geneset/WP_FARNESOID_X_RECEPTOR_PATHWAY
Curated_gene_sets	WP_CHOLESTASIS	19	3	0.000104744	0.00496578	ABCC2:ABCC4:ABCC3	http://www.gsea-msigdb.org/gsea/msigdb/human/geneset/WP_CHOLESTASIS
Curated_gene_sets	SMIRNOV_CIRCULATING_ENDOTHELIOCYTES_IN_CANCER_UP	153	6	0.000109057	0.00513278	CYP1B1:TLR2:ABCB1:CYP1A1:NOD2:SLC16A6	http://www.gsea-msigdb.org/gsea/msigdb/human/geneset/SMIRNOV_CIRCULATING_ENDOTHELIOCYTES_IN_CANCER_UP
Curated_gene_sets	DESERT_PERIPORTAL_HEPATOCELLULAR_CARCINOMA_SUBCLASS_UP	155	6	0.000117116	0.00547242	GBA3:SLC22A7:CYP3A43:CYP2C18:CYP2C9:CYP2C8	http://www.gsea-msigdb.org/gsea/msigdb/human/geneset/DESERT_PERIPORTAL_HEPATOCELLULAR_CARCINOMA_SUBCLASS_UP
Curated_gene_sets	BIOCARTA_P53HYPOXIA_PATHWAY	20	3	0.000122788	0.0056561	ABCB1:HIF1A:AKT1	http://www.gsea-msigdb.org/gsea/msigdb/human/geneset/BIOCARTA_P53HYPOXIA_PATHWAY
Curated_gene_sets	WP_IMATINIB_AND_CHRONIC_MYELOID_LEUKEMIA	20	3	0.000122788	0.0056561	ABCG2:ABCB1:CDKN1B	http://www.gsea-msigdb.org/gsea/msigdb/human/geneset/WP_IMATINIB_AND_CHRONIC_MYELOID_LEUKEMIA
Curated_gene_sets	REACTOME_SLC_TRANSPORTER_DISORDERS	99	5	0.000128165	0.0058622	SLC16A1:SLC2A2:SLC22A5:SLC22A12:SLC5A1	http://www.gsea-msigdb.org/gsea/msigdb/human/geneset/REACTOME_SLC_TRANSPORTER_DISORDERS
Curated_gene_sets	KEGG_TOLL_LIKE_RECEPTOR_SIGNALING_PATHWAY	100	5	0.000134387	0.00610381	TLR5:MYD88:TLR2:TLR4:AKT1	http://www.gsea-msigdb.org/gsea/msigdb/human/geneset/KEGG_TOLL_LIKE_RECEPTOR_SIGNALING_PATHWAY
Curated_gene_sets	REACTOME_THE_CITRIC_ACID_TCA_CYCLE_AND_RESPIRATORY_ELECTRON_TRANSPORT	160	6	0.000139343	0.00628496	SLC16A1:LDHA:LDHB:SLC16A8:PDHA1:PDK3	http://www.gsea-msigdb.org/gsea/msigdb/human/geneset/REACTOME_THE_CITRIC_ACID_TCA_CYCLE_AND_RESPIRATORY_ELECTRON_TRANSPORT
Curated_gene_sets	WP_TOLLLIKE_RECEPTOR_SIGNALING_PATHWAY	101	5	0.000140838	0.0063054	TLR5:MYD88:TLR2:TLR4:AKT1	http://www.gsea-msigdb.org/gsea/msigdb/human/geneset/WP_TOLLLIKE_RECEPTOR_SIGNALING_PATHWAY
Curated_gene_sets	REACTOME_INTESTINAL_ABSORPTION	4	2	0.000141738	0.0063054	SLC2A2:SLC5A1	http://www.gsea-msigdb.org/gsea/msigdb/human/geneset/REACTOME_INTESTINAL_ABSORPTION
Curated_gene_sets	WP_FOXA2_PATHWAY	21	3	0.000142742	0.00630687	ABCC2:ABCC4:ABCC3	http://www.gsea-msigdb.org/gsea/msigdb/human/geneset/WP_FOXA2_PATHWAY
Curated_gene_sets	OHGUCHI_LIVER_HNF4A_TARGETS_DN	161	6	0.000144165	0.00632669	UGT2B17:UGT2A3:UGT2B28:SULT1B1:SLC22A7:SULT2A1	http://www.gsea-msigdb.org/gsea/msigdb/human/geneset/OHGUCHI_LIVER_HNF4A_TARGETS_DN
Curated_gene_sets	LIU_OVARIAN_CANCER_TUMORS_AND_XENOGRAFTS_XDGS_DN	1525	19	0.000152494	0.00664733	FMO3:FMO2:FMO1:CYP1B1:SULT1C4:ABCG2:EMCN:TLR2:AHR:ABCB1:SULF1:TLR4:SLC16A7:NOD2:CCL2:ABCC3:SLC16A6:SULF2:SLC16A2	http://www.gsea-msigdb.org/gsea/msigdb/human/geneset/LIU_OVARIAN_CANCER_TUMORS_AND_XENOGRAFTS_XDGS_DN
Curated_gene_sets	REACTOME_BASIGIN_INTERACTIONS	22	3	0.000164691	0.00708388	SLC16A1:ITGA6:SLC16A8	http://www.gsea-msigdb.org/gsea/msigdb/human/geneset/REACTOME_BASIGIN_INTERACTIONS
Curated_gene_sets	WP_PI3KAKTMTOR_VITAMIN_D3_SIGNALING	22	3	0.000164691	0.00708388	LDHA:AKT1:PDHA1	http://www.gsea-msigdb.org/gsea/msigdb/human/geneset/WP_PI3KAKTMTOR_VITAMIN_D3_SIGNALING
Curated_gene_sets	JINESH_BLEBBISHIELD_TRANSFORMED_STEM_CELL_SPHERES_UP	166	6	0.000170294	0.0072767	CYP1B1:UGT1A7:ABCC5:CYP3A5:CYP1A2:SLC16A5	http://www.gsea-msigdb.org/gsea/msigdb/human/geneset/JINESH_BLEBBISHIELD_TRANSFORMED_STEM_CELL_SPHERES_UP
Curated_gene_sets	WP_LDL_INFLUENCE_ON_CD14_AND_TLR4	23	3	0.000188719	0.00792079	TLR4:AKT1:CCL2	http://www.gsea-msigdb.org/gsea/msigdb/human/geneset/WP_LDL_INFLUENCE_ON_CD14_AND_TLR4
Curated_gene_sets	PID_TOLL_ENDOGENOUS_PATHWAY	23	3	0.000188719	0.00792079	MYD88:TLR2:TLR4	http://www.gsea-msigdb.org/gsea/msigdb/human/geneset/PID_TOLL_ENDOGENOUS_PATHWAY
Curated_gene_sets	WUNDER_INFLAMMATORY_RESPONSE_AND_CHOLESTEROL_UP	58	4	0.000189026	0.00792079	SLC16A1:UGT2B28:TLR2:MUC17:RN7SKP54	http://www.gsea-msigdb.org/gsea/msigdb/human/geneset/WUNDER_INFLAMMATORY_RESPONSE_AND_CHOLESTEROL_UP
Curated_gene_sets	SERVITJA_ISLET_HNF1A_TARGETS_DN	108	5	0.000192881	0.00803052	SULT1C2:UGT1A1:SLC2A2:MUC4:UGT2B7	http://www.gsea-msigdb.org/gsea/msigdb/human/geneset/SERVITJA_ISLET_HNF1A_TARGETS_DN
Curated_gene_sets	WP_IL1_AND_MEGAKARYOCYTES_IN_OBESITY	24	3	0.00021491	0.00877887	MYD88:TLR2:CCL2	http://www.gsea-msigdb.org/gsea/msigdb/human/geneset/WP_IL1_AND_MEGAKARYOCYTES_IN_OBESITY
Curated_gene_sets	REACTOME_DIGESTION_AND_ABSORPTION	24	3	0.00021491	0.00877887	LCT:SLC2A2:SLC5A1	http://www.gsea-msigdb.org/gsea/msigdb/human/geneset/REACTOME_DIGESTION_AND_ABSORPTION
Curated_gene_sets	WP_ANGIOGENESIS	24	3	0.00021491	0.00877887	ARNT:HIF1A:AKT1	http://www.gsea-msigdb.org/gsea/msigdb/human/geneset/WP_ANGIOGENESIS
Curated_gene_sets	REACTOME_REGULATION_OF_LIPID_METABOLISM_BY_PPARALPHA	112	5	0.000228555	0.00926905	ARNT:UGT1A9:AHR:CYP1A1:SULT2A1	http://www.gsea-msigdb.org/gsea/msigdb/human/geneset/REACTOME_REGULATION_OF_LIPID_METABOLISM_BY_PPARALPHA
Curated_gene_sets	BOSCO_EPITHELIAL_DIFFERENTIATION_MODULE	61	4	0.000229891	0.00926905	MUC1:MUC4:MUC21:MUC16	http://www.gsea-msigdb.org/gsea/msigdb/human/geneset/BOSCO_EPITHELIAL_DIFFERENTIATION_MODULE
Curated_gene_sets	BIOCARTA_ACETAMINOPHEN_PATHWAY	5	2	0.000235472	0.00926905	CYP2E1:CYP1A2	http://www.gsea-msigdb.org/gsea/msigdb/human/geneset/BIOCARTA_ACETAMINOPHEN_PATHWAY
Curated_gene_sets	WP_SULINDAC_METABOLIC_PATHWAY	5	2	0.000235472	0.00926905	CYP1B1:CYP1A2	http://www.gsea-msigdb.org/gsea/msigdb/human/geneset/WP_SULINDAC_METABOLIC_PATHWAY
Curated_gene_sets	REACTOME_ABACAVIR_TRANSMEMBRANE_TRANSPORT	5	2	0.000235472	0.00926905	ABCG2:ABCB1	http://www.gsea-msigdb.org/gsea/msigdb/human/geneset/REACTOME_ABACAVIR_TRANSMEMBRANE_TRANSPORT
Curated_gene_sets	REACTOME_CIPROFLOXACIN_ADME	5	2	0.000235472	0.00926905	ABCG2:SLC22A8	http://www.gsea-msigdb.org/gsea/msigdb/human/geneset/REACTOME_CIPROFLOXACIN_ADME
Curated_gene_sets	CAIRO_HEPATOBLASTOMA_DN	254	7	0.000259939	0.0101705	GBA3:SLC22A7:CYP3A5:CYP2C18:CYP2C19:CYP2C8:CYP1A2	http://www.gsea-msigdb.org/gsea/msigdb/human/geneset/CAIRO_HEPATOBLASTOMA_DN
Curated_gene_sets	REACTOME_ENDOGENOUS_STEROLS	26	3	0.000274106	0.0106606	ARNT:CYP1B1:AHR	http://www.gsea-msigdb.org/gsea/msigdb/human/geneset/REACTOME_ENDOGENOUS_STEROLS
Curated_gene_sets	WP_ONCOSTATIN_M_SIGNALING_PATHWAY	65	4	0.000293796	0.0113584	CDKN1B:HIF1A:AKT1:CCL2	http://www.gsea-msigdb.org/gsea/msigdb/human/geneset/WP_ONCOSTATIN_M_SIGNALING_PATHWAY
Curated_gene_sets	TONKS_TARGETS_OF_RUNX1_RUNX1T1_FUSION_HSC_DN	185	6	0.00030552	0.0117417	CYP1B1:ITGA6:SLC16A7:ABCC4:NOD2:CCL2	http://www.gsea-msigdb.org/gsea/msigdb/human/geneset/TONKS_TARGETS_OF_RUNX1_RUNX1T1_FUSION_HSC_DN
Curated_gene_sets	SANSOM_APC_TARGETS_DN	348	8	0.000322212	0.0123104	LCT:SLC2A2:UGT2B28:ABCC2:KCNJ11:ABCC3:SULT2B1:SLC5A1	http://www.gsea-msigdb.org/gsea/msigdb/human/geneset/SANSOM_APC_TARGETS_DN
Curated_gene_sets	SOGA_COLORECTAL_CANCER_MYC_DN	68	4	0.000349429	0.0132722	GBA3:UGT2A3:SLC22A5:SULT1A2	http://www.gsea-msigdb.org/gsea/msigdb/human/geneset/SOGA_COLORECTAL_CANCER_MYC_DN
Curated_gene_sets	REACTOME_ARYL_HYDROCARBON_RECEPTOR_SIGNALLING	6	2	0.000352076	0.013295	ARNT:AHR	http://www.gsea-msigdb.org/gsea/msigdb/human/geneset/REACTOME_ARYL_HYDROCARBON_RECEPTOR_SIGNALLING
Curated_gene_sets	FRASOR_RESPONSE_TO_ESTRADIOL_DN	72	4	0.000434832	0.0162312	FMO5:MUC1:ABCC5:SLC16A5	http://www.gsea-msigdb.org/gsea/msigdb/human/geneset/FRASOR_RESPONSE_TO_ESTRADIOL_DN
Curated_gene_sets	ANDERSEN_LIVER_CANCER_KRT19_DN	72	4	0.000434832	0.0162312	UGT2B17:UGT2B15:SLC22A7:CYP3A4	http://www.gsea-msigdb.org/gsea/msigdb/human/geneset/ANDERSEN_LIVER_CANCER_KRT19_DN
Curated_gene_sets	WP_TYPE_I_INTERFERON_INDUCTION_AND_SIGNALING_DURING_SARSCOV2_INFECTION	31	3	0.000465508	0.017277	MYD88:TLR2:TLR4	http://www.gsea-msigdb.org/gsea/msigdb/human/geneset/WP_TYPE_I_INTERFERON_INDUCTION_AND_SIGNALING_DURING_SARSCOV2_INFECTION
Curated_gene_sets	WP_NONGENOMIC_ACTIONS_OF_125_DIHYDROXYVITAMIN_D3	74	4	0.000482684	0.0178127	TLR2:TLR4:NOD2:CCL2	http://www.gsea-msigdb.org/gsea/msigdb/human/geneset/WP_NONGENOMIC_ACTIONS_OF_125_DIHYDROXYVITAMIN_D3
Curated_gene_sets	WP_ARACHIDONATE_EPOXYGENASE_EPOXIDE_HYDROLASE	7	2	0.000491327	0.0180292	CYP2C9:CYP2C8	http://www.gsea-msigdb.org/gsea/msigdb/human/geneset/WP_ARACHIDONATE_EPOXYGENASE_EPOXIDE_HYDROLASE
Curated_gene_sets	WP_OXIDATIVE_STRESS_RESPONSE	32	3	0.000511835	0.0186762	NFE2L2:UGT1A6:CYP1A1	http://www.gsea-msigdb.org/gsea/msigdb/human/geneset/WP_OXIDATIVE_STRESS_RESPONSE
Curated_gene_sets	WP_MALE_INFERTILITY	134	5	0.000522264	0.0189503	NFE2L2:AHR:ABCB1:SLC16A7:CYP1A1	http://www.gsea-msigdb.org/gsea/msigdb/human/geneset/WP_MALE_INFERTILITY
Curated_gene_sets	PICCALUGA_ANGIOIMMUNOBLASTIC_LYMPHOMA_UP	205	6	0.000526864	0.019011	CYP1B1:EMCN:SULF1:TLR4:CCL2:ABCC3	http://www.gsea-msigdb.org/gsea/msigdb/human/geneset/PICCALUGA_ANGIOIMMUNOBLASTIC_LYMPHOMA_UP
Curated_gene_sets	SCHOEN_NFKB_SIGNALING	34	3	0.000613118	0.0218346	SULF1:CDKN1B:CCL2	http://www.gsea-msigdb.org/gsea/msigdb/human/geneset/SCHOEN_NFKB_SIGNALING
Curated_gene_sets	FRASOR_RESPONSE_TO_ESTRADIOL_UP	34	3	0.000613118	0.0218346	CYP1B1:SLC22A5:CYP1A1	http://www.gsea-msigdb.org/gsea/msigdb/human/geneset/FRASOR_RESPONSE_TO_ESTRADIOL_UP
Curated_gene_sets	VECCHI_GASTRIC_CANCER_ADVANCED_VS_EARLY_DN	139	5	0.000616906	0.0218346	FMO5:MUC1:SULT1C2:ABCG2:SULT1A2	http://www.gsea-msigdb.org/gsea/msigdb/human/geneset/VECCHI_GASTRIC_CANCER_ADVANCED_VS_EARLY_DN
Curated_gene_sets	CHIANG_LIVER_CANCER_SUBCLASS_UNANNOTATED_UP	79	4	0.000618563	0.0218346	ARNT:MUC20:CYP2C19:CYP1A2	http://www.gsea-msigdb.org/gsea/msigdb/human/geneset/CHIANG_LIVER_CANCER_SUBCLASS_UNANNOTATED_UP
Curated_gene_sets	WP_EICOSANOID_METABOLISM_VIA_CYTOCHROME_P450_MONOOXYGENASES_PATHWAY	8	2	0.000653004	0.0225599	CYP2C18:CYP2C8	http://www.gsea-msigdb.org/gsea/msigdb/human/geneset/WP_EICOSANOID_METABOLISM_VIA_CYTOCHROME_P450_MONOOXYGENASES_PATHWAY
Curated_gene_sets	WP_HIF1A_AND_PPARG_REGULATION_OF_GLYCOLYSIS	8	2	0.000653004	0.0225599	LDHA:HIF1A	http://www.gsea-msigdb.org/gsea/msigdb/human/geneset/WP_HIF1A_AND_PPARG_REGULATION_OF_GLYCOLYSIS
Curated_gene_sets	WP_GLUCOSE_METABOLISM_IN_TRIPLENEGATIVE_BREAST_CANCER_CELLS	8	2	0.000653004	0.0225599	SLC16A1:LDHA	http://www.gsea-msigdb.org/gsea/msigdb/human/geneset/WP_GLUCOSE_METABOLISM_IN_TRIPLENEGATIVE_BREAST_CANCER_CELLS
Curated_gene_sets	MOOTHA_PYR	8	2	0.000653004	0.0225599	PDHA1:PDK3	http://www.gsea-msigdb.org/gsea/msigdb/human/geneset/MOOTHA_PYR
Curated_gene_sets	HARRIS_HYPOXIA	81	4	0.000679817	0.023239	LDHA:CDKN1B:HIF1A:CCL2	http://www.gsea-msigdb.org/gsea/msigdb/human/geneset/HARRIS_HYPOXIA
Curated_gene_sets	FOROUTAN_PRODRANK_TGFB_EMT_DN	81	4	0.000679817	0.023239	MUC1:CYP1B1:SLC16A7:SULT1A1	http://www.gsea-msigdb.org/gsea/msigdb/human/geneset/FOROUTAN_PRODRANK_TGFB_EMT_DN
Curated_gene_sets	WP_ACUTE_VIRAL_MYOCARDITIS	85	4	0.00081501	0.0277146	TLR5:TLR4:AKT1:NOD2	http://www.gsea-msigdb.org/gsea/msigdb/human/geneset/WP_ACUTE_VIRAL_MYOCARDITIS
Curated_gene_sets	HOFFMAN_CLOCK_TARGETS_UP	9	2	0.000836887	0.0277326	UGT2B17:UGT2B15	http://www.gsea-msigdb.org/gsea/msigdb/human/geneset/HOFFMAN_CLOCK_TARGETS_UP
Curated_gene_sets	WP_MINERALOCORTICOID_BIOSYNTHESIS	9	2	0.000836887	0.0277326	UGT1A10:UGT2B7	http://www.gsea-msigdb.org/gsea/msigdb/human/geneset/WP_MINERALOCORTICOID_BIOSYNTHESIS
Curated_gene_sets	REACTOME_ABACAVIR_ADME	9	2	0.000836887	0.0277326	ABCG2:ABCB1	http://www.gsea-msigdb.org/gsea/msigdb/human/geneset/REACTOME_ABACAVIR_ADME
Curated_gene_sets	WP_ETHANOL_METABOLISM_PRODUCTION_OF_ROS_BY_CYP2E1	9	2	0.000836887	0.0277326	NFE2L2:CYP2E1	http://www.gsea-msigdb.org/gsea/msigdb/human/geneset/WP_ETHANOL_METABOLISM_PRODUCTION_OF_ROS_BY_CYP2E1
Curated_gene_sets	WP_APOE_AND_MIR146_IN_INFLAMMATION_AND_ATHEROSCLEROSIS	9	2	0.000836887	0.0277326	TLR2:TLR4	http://www.gsea-msigdb.org/gsea/msigdb/human/geneset/WP_APOE_AND_MIR146_IN_INFLAMMATION_AND_ATHEROSCLEROSIS
Curated_gene_sets	KEGG_PYRUVATE_METABOLISM	39	3	0.00091985	0.030327	LDHA:LDHB:PDHA1	http://www.gsea-msigdb.org/gsea/msigdb/human/geneset/KEGG_PYRUVATE_METABOLISM
Curated_gene_sets	REACTOME_POST_TRANSLATIONAL_PROTEIN_MODIFICATION	1361	16	0.000988102	0.0323412	MUC1:NFE2L2:MUC13:MUC20:MUC4:MUC7:MUC21:MUC12:MUC17:RN7SKP54:MUC6:MUC5AC:MUC5B:MUC15:HIF1A:NOD2:MUC16	http://www.gsea-msigdb.org/gsea/msigdb/human/geneset/REACTOME_POST_TRANSLATIONAL_PROTEIN_MODIFICATION
Curated_gene_sets	KEGG_TRYPTOPHAN_METABOLISM	40	3	0.000990899	0.0323412	CYP1B1:CYP1A1:CYP1A2	http://www.gsea-msigdb.org/gsea/msigdb/human/geneset/KEGG_TRYPTOPHAN_METABOLISM
Curated_gene_sets	GOZGIT_ESR1_TARGETS_DN	738	11	0.00101507	0.0329643	CYP1B1:ITGA6:MUC20:AHR:SULF1:CYP2C8:SLC16A7:CYP1A1:ABCC1:SLC16A6:PDK3	http://www.gsea-msigdb.org/gsea/msigdb/human/geneset/GOZGIT_ESR1_TARGETS_DN
Curated_gene_sets	MCCOLLUM_GELDANAMYCIN_RESISTANCE_UP	10	2	0.00104276	0.0333632	SLC16A7:SULF2	http://www.gsea-msigdb.org/gsea/msigdb/human/geneset/MCCOLLUM_GELDANAMYCIN_RESISTANCE_UP
Curated_gene_sets	WP_LNCRNAMEDIATED_MECHANISMS_OF_THERAPEUTIC_RESISTANCE	10	2	0.00104276	0.0333632	ABCB1:HIF1A	http://www.gsea-msigdb.org/gsea/msigdb/human/geneset/WP_LNCRNAMEDIATED_MECHANISMS_OF_THERAPEUTIC_RESISTANCE
Curated_gene_sets	BIOCARTA_EPONFKB_PATHWAY	10	2	0.00104276	0.0333632	ARNT:HIF1A	http://www.gsea-msigdb.org/gsea/msigdb/human/geneset/BIOCARTA_EPONFKB_PATHWAY
Curated_gene_sets	WP_VITAMIN_A_AND_CAROTENOID_METABOLISM	41	3	0.00106533	0.0339182	CYP2E1:SULT1A1:SULT2B1	http://www.gsea-msigdb.org/gsea/msigdb/human/geneset/WP_VITAMIN_A_AND_CAROTENOID_METABOLISM
Curated_gene_sets	KIM_LIVER_CANCER_POOR_SURVIVAL_DN	42	3	0.0011432	0.03622	SLC2A2:SLC22A7:SULT2A1	http://www.gsea-msigdb.org/gsea/msigdb/human/geneset/KIM_LIVER_CANCER_POOR_SURVIVAL_DN
Curated_gene_sets	REACTOME_TOLL_LIKE_RECEPTOR_CASCADES	160	5	0.00116049	0.0365891	TLR5:MYD88:TLR2:TLR4:NOD2	http://www.gsea-msigdb.org/gsea/msigdb/human/geneset/REACTOME_TOLL_LIKE_RECEPTOR_CASCADES
Curated_gene_sets	REACTOME_REGULATION_OF_GENE_EXPRESSION_BY_HYPOXIA_INDUCIBLE_FACTOR	11	2	0.00127041	0.0398613	ARNT:HIF1A	http://www.gsea-msigdb.org/gsea/msigdb/human/geneset/REACTOME_REGULATION_OF_GENE_EXPRESSION_BY_HYPOXIA_INDUCIBLE_FACTOR
Curated_gene_sets	PID_HNF3B_PATHWAY	44	3	0.00130952	0.040891	SLC2A2:KCNJ11:AKT1	http://www.gsea-msigdb.org/gsea/msigdb/human/geneset/PID_HNF3B_PATHWAY
Curated_gene_sets	DANG_REGULATED_BY_MYC_DN	245	6	0.00132712	0.0412424	UGT1A6:UGT1A1:SLC2A2:UGT2B15:CDKN1B:AKT1	http://www.gsea-msigdb.org/gsea/msigdb/human/geneset/DANG_REGULATED_BY_MYC_DN
Curated_gene_sets	GERHOLD_ADIPOGENESIS_UP	47	3	0.00158627	0.0485983	LDHA:LDHB:PDHA1	http://www.gsea-msigdb.org/gsea/msigdb/human/geneset/GERHOLD_ADIPOGENESIS_UP
Curated_gene_sets	KLEIN_PRIMARY_EFFUSION_LYMPHOMA_UP	47	3	0.00158627	0.0485983	MUC1:GUSB:SULT1A2	http://www.gsea-msigdb.org/gsea/msigdb/human/geneset/KLEIN_PRIMARY_EFFUSION_LYMPHOMA_UP
Curated_gene_sets	BROWNE_HCMV_INFECTION_2HR_DN	47	3	0.00158627	0.0485983	ITGA6:CDKN1B:ABCC1	http://www.gsea-msigdb.org/gsea/msigdb/human/geneset/BROWNE_HCMV_INFECTION_2HR_DN
Canonical_Pathways	WP_METAPATHWAY_BIOTRANSFORMATION_PHASE_I_AND_II	175	44	8.41739e-65	2.60097e-61	AKR7A2:FMO5:FMO3:FMO2:FMO1:FMO4:CYP1B1:SULT1C2:SULT1C4:UGT1A8:UGT1A10:UGT1A9:UGT1A7:UGT1A6:UGT1A5:UGT1A4:UGT1A3:UGT1A1:UGT2B17:UGT2B15:UGT2A3:UGT2B7:UGT2B11:UGT2B28:UGT2B4:UGT2A1:UGT2A2:UGT2A1:SULT1B1:SULT1E1:CYP3A5:CYP3A4:CYP3A43:CYP2C18:CYP2C19:CYP2C9:CYP2C8:CYP2E1:CYP1A1:CYP1A2:SULT1A2:SULT1A1:SULT2A1:SULT2B1:COMT:SULT4A1	http://www.gsea-msigdb.org/gsea/msigdb/human/geneset/WP_METAPATHWAY_BIOTRANSFORMATION_PHASE_I_AND_II
Canonical_Pathways	REACTOME_BIOLOGICAL_OXIDATIONS	206	44	2.62782e-61	4.05998e-58	AKR7A2:ARNT:FMO3:FMO2:FMO1:CYP1B1:SULT1C2:SULT1C4:UGT1A8:UGT1A10:UGT1A9:UGT1A7:UGT1A6:UGT1A5:UGT1A4:UGT1A3:UGT1A1:UGT2B17:UGT2B15:UGT2A3:UGT2B7:UGT2B11:UGT2B28:UGT2B4:UGT2A1:UGT2A2:UGT2A1:SULT1B1:SULT1E1:AHR:CYP3A5:CYP3A4:CYP3A43:CYP2C18:CYP2C19:CYP2C9:CYP2C8:CYP2E1:CYP1A1:CYP1A2:SULT1A2:SULT1A1:SULT2A1:SULT2B1:COMT:SULT4A1	http://www.gsea-msigdb.org/gsea/msigdb/human/geneset/REACTOME_BIOLOGICAL_OXIDATIONS
Canonical_Pathways	REACTOME_DRUG_ADME	100	36	3.02626e-59	3.11704e-56	SLC16A1:SULT1C4:UGT1A8:UGT1A10:UGT1A9:UGT1A7:UGT1A6:UGT1A5:UGT1A4:UGT1A3:UGT1A1:ABCC5:UGT2B17:UGT2B15:UGT2A3:UGT2B7:UGT2B11:UGT2B28:UGT2B4:UGT2A1:UGT2A2:UGT2A1:SULT1E1:ABCG2:SLC22A7:ABCB1:CYP3A4:CYP2C19:CYP2C9:CYP2C8:ABCC2:CYP2E1:SLC22A8:ABCC4:ABCC1:SULT1A1:ABCC3:SULT2A1	http://www.gsea-msigdb.org/gsea/msigdb/human/geneset/REACTOME_DRUG_ADME
Canonical_Pathways	KEGG_DRUG_METABOLISM_CYTOCHROME_P450	68	30	1.44569e-52	1.11679e-49	FMO5:FMO3:FMO2:FMO1:FMO4:UGT1A8:UGT1A10:UGT1A9:UGT1A7:UGT1A6:UGT1A5:UGT1A4:UGT1A3:UGT1A1:UGT2B17:UGT2B15:UGT2A3:UGT2B7:UGT2B11:UGT2B28:UGT2B4:UGT2A1:UGT2A1:CYP3A5:CYP3A4:CYP3A43:CYP2C18:CYP2C19:CYP2C9:CYP2C8:CYP2E1:CYP1A2	http://www.gsea-msigdb.org/gsea/msigdb/human/geneset/KEGG_DRUG_METABOLISM_CYTOCHROME_P450
Canonical_Pathways	REACTOME_ASPIRIN_ADME	39	25	1.69649e-49	1.04843e-46	SLC16A1:UGT1A8:UGT1A9:UGT1A7:UGT1A6:UGT1A5:UGT1A4:UGT1A3:UGT1A1:UGT2B17:UGT2B15:UGT2A3:UGT2B7:UGT2B11:UGT2B28:UGT2B4:UGT2A1:UGT2A2:UGT2A1:SLC22A7:CYP3A4:CYP2C19:CYP2C9:CYP2C8:ABCC2:CYP2E1:ABCC3	http://www.gsea-msigdb.org/gsea/msigdb/human/geneset/REACTOME_ASPIRIN_ADME
Canonical_Pathways	KEGG_METABOLISM_OF_XENOBIOTICS_BY_CYTOCHROME_P450	66	27	3.73388e-46	1.92295e-43	CYP1B1:UGT1A8:UGT1A10:UGT1A9:UGT1A7:UGT1A6:UGT1A5:UGT1A4:UGT1A3:UGT1A1:UGT2B17:UGT2B15:UGT2A3:UGT2B7:UGT2B11:UGT2B28:UGT2B4:UGT2A1:UGT2A1:CYP3A5:CYP3A4:CYP3A43:CYP2C18:CYP2C19:CYP2C9:CYP2C8:CYP2E1:CYP1A1:CYP1A2	http://www.gsea-msigdb.org/gsea/msigdb/human/geneset/KEGG_METABOLISM_OF_XENOBIOTICS_BY_CYTOCHROME_P450
Canonical_Pathways	KEGG_RETINOL_METABOLISM	58	25	1.82835e-43	8.07084e-41	UGT1A8:UGT1A10:UGT1A9:UGT1A7:UGT1A6:UGT1A5:UGT1A4:UGT1A3:UGT1A1:UGT2B17:UGT2B15:UGT2A3:UGT2B7:UGT2B11:UGT2B28:UGT2B4:UGT2A1:UGT2A1:CYP3A5:CYP3A4:CYP3A43:CYP2C18:CYP2C19:CYP2C9:CYP2C8:CYP1A1:CYP1A2	http://www.gsea-msigdb.org/gsea/msigdb/human/geneset/KEGG_RETINOL_METABOLISM
Canonical_Pathways	KEGG_STEROID_HORMONE_BIOSYNTHESIS	50	24	3.3377e-43	1.28919e-40	CYP1B1:UGT1A8:UGT1A10:UGT1A9:UGT1A7:UGT1A6:UGT1A5:UGT1A4:UGT1A3:UGT1A1:UGT2B17:UGT2B15:UGT2A3:UGT2B7:UGT2B11:UGT2B28:UGT2B4:UGT2A1:UGT2A1:SULT1E1:CYP3A5:CYP3A4:CYP3A43:CYP1A1:SULT2B1:COMT	http://www.gsea-msigdb.org/gsea/msigdb/human/geneset/KEGG_STEROID_HORMONE_BIOSYNTHESIS
Canonical_Pathways	REACTOME_PHASE_II_CONJUGATION_OF_COMPOUNDS	101	28	3.53408e-42	1.21337e-39	SULT1C2:SULT1C4:UGT1A8:UGT1A10:UGT1A9:UGT1A7:UGT1A6:UGT1A5:UGT1A4:UGT1A3:UGT1A1:UGT2B17:UGT2B15:UGT2A3:UGT2B7:UGT2B11:UGT2B28:UGT2B4:UGT2A1:UGT2A2:UGT2A1:SULT1B1:SULT1E1:CYP1A2:SULT1A2:SULT1A1:SULT2A1:SULT2B1:COMT:SULT4A1	http://www.gsea-msigdb.org/gsea/msigdb/human/geneset/REACTOME_PHASE_II_CONJUGATION_OF_COMPOUNDS
Canonical_Pathways	WP_TAMOXIFEN_METABOLISM	19	18	1.28761e-41	3.97871e-39	FMO3:FMO1:CYP1B1:UGT1A10:UGT1A4:UGT2B15:UGT2B7:SULT1E1:CYP3A5:CYP3A4:CYP2C19:CYP2C9:CYP2C8:CYP2E1:CYP1A1:CYP1A2:SULT1A1:SULT2A1	http://www.gsea-msigdb.org/gsea/msigdb/human/geneset/WP_TAMOXIFEN_METABOLISM
Canonical_Pathways	REACTOME_GLUCURONIDATION	23	17	1.59675e-35	4.48541e-33	UGT1A8:UGT1A10:UGT1A9:UGT1A7:UGT1A6:UGT1A5:UGT1A4:UGT1A3:UGT1A1:UGT2B17:UGT2B15:UGT2A3:UGT2B7:UGT2B11:UGT2B28:UGT2B4:UGT2A1:UGT2A2:UGT2A1	http://www.gsea-msigdb.org/gsea/msigdb/human/geneset/REACTOME_GLUCURONIDATION
Canonical_Pathways	WP_GLUCURONIDATION	24	17	5.45284e-35	1.40379e-32	UGT1A8:UGT1A10:UGT1A9:UGT1A7:UGT1A6:UGT1A5:UGT1A4:UGT1A3:UGT1A1:UGT2B17:UGT2B15:UGT2A3:UGT2B7:UGT2B11:UGT2B28:UGT2B4:UGT2A1:UGT2A2:UGT2A1	http://www.gsea-msigdb.org/gsea/msigdb/human/geneset/WP_GLUCURONIDATION
Canonical_Pathways	KEGG_DRUG_METABOLISM_OTHER_ENZYMES	46	20	5.90593e-35	1.40379e-32	UGT1A8:UGT1A10:UGT1A9:UGT1A7:UGT1A6:UGT1A5:UGT1A4:UGT1A3:UGT1A1:UGT2B17:UGT2B15:UGT2A3:UGT2B7:UGT2B11:UGT2B28:UGT2B4:UGT2A1:UGT2A1:GUSB:CYP3A5:CYP3A4:CYP3A43	http://www.gsea-msigdb.org/gsea/msigdb/human/geneset/KEGG_DRUG_METABOLISM_OTHER_ENZYMES
Canonical_Pathways	KEGG_PENTOSE_AND_GLUCURONATE_INTERCONVERSIONS	26	17	4.88372e-34	1.07791e-31	UGT1A8:UGT1A10:UGT1A9:UGT1A7:UGT1A6:UGT1A5:UGT1A4:UGT1A3:UGT1A1:UGT2B17:UGT2B15:UGT2A3:UGT2B7:UGT2B11:UGT2B28:UGT2B4:UGT2A1:UGT2A1:GUSB	http://www.gsea-msigdb.org/gsea/msigdb/human/geneset/KEGG_PENTOSE_AND_GLUCURONATE_INTERCONVERSIONS
Canonical_Pathways	KEGG_ASCORBATE_AND_ALDARATE_METABOLISM	23	16	9.10587e-33	1.87581e-30	UGT1A8:UGT1A10:UGT1A9:UGT1A7:UGT1A6:UGT1A5:UGT1A4:UGT1A3:UGT1A1:UGT2B17:UGT2B15:UGT2A3:UGT2B7:UGT2B11:UGT2B28:UGT2B4:UGT2A1:UGT2A1	http://www.gsea-msigdb.org/gsea/msigdb/human/geneset/KEGG_ASCORBATE_AND_ALDARATE_METABOLISM
Canonical_Pathways	REACTOME_PARACETAMOL_ADME	26	16	1.9494e-31	3.76479e-29	SULT1C4:UGT1A10:UGT1A9:UGT1A6:UGT1A1:ABCC5:UGT2B15:SULT1E1:ABCG2:ABCC2:CYP2E1:ABCC4:ABCC1:SULT1A1:ABCC3:SULT2A1	http://www.gsea-msigdb.org/gsea/msigdb/human/geneset/REACTOME_PARACETAMOL_ADME
Canonical_Pathways	KEGG_STARCH_AND_SUCROSE_METABOLISM	47	18	2.77199e-30	5.0385e-28	UGT1A8:UGT1A10:UGT1A9:UGT1A7:UGT1A6:UGT1A5:UGT1A4:UGT1A3:UGT1A1:GBA3:UGT2B17:UGT2B15:UGT2A3:UGT2B7:UGT2B11:UGT2B28:UGT2B4:UGT2A1:UGT2A1:GUSB	http://www.gsea-msigdb.org/gsea/msigdb/human/geneset/KEGG_STARCH_AND_SUCROSE_METABOLISM
Canonical_Pathways	KEGG_PORPHYRIN_AND_CHLOROPHYLL_METABOLISM	39	17	7.57295e-30	1.30002e-27	UGT1A8:UGT1A10:UGT1A9:UGT1A7:UGT1A6:UGT1A5:UGT1A4:UGT1A3:UGT1A1:UGT2B17:UGT2B15:UGT2A3:UGT2B7:UGT2B11:UGT2B28:UGT2B4:UGT2A1:UGT2A1:GUSB	http://www.gsea-msigdb.org/gsea/msigdb/human/geneset/KEGG_PORPHYRIN_AND_CHLOROPHYLL_METABOLISM
Canonical_Pathways	REACTOME_DEFECTIVE_GALNT3_CAUSES_HFTC	15	13	4.92493e-29	8.00948e-27	MUC1:MUC13:MUC20:MUC4:MUC7:MUC21:MUC12:MUC17:RN7SKP54:MUC6:MUC5AC:MUC5B:MUC15:MUC16	http://www.gsea-msigdb.org/gsea/msigdb/human/geneset/REACTOME_DEFECTIVE_GALNT3_CAUSES_HFTC
Canonical_Pathways	REACTOME_DEFECTIVE_C1GALT1C1_CAUSES_TNPS	16	13	2.61598e-28	4.04169e-26	MUC1:MUC13:MUC20:MUC4:MUC7:MUC21:MUC12:MUC17:RN7SKP54:MUC6:MUC5AC:MUC5B:MUC15:MUC16	http://www.gsea-msigdb.org/gsea/msigdb/human/geneset/REACTOME_DEFECTIVE_C1GALT1C1_CAUSES_TNPS
Canonical_Pathways	WP_NUCLEAR_RECEPTORS_METAPATHWAY	306	28	8.83719e-28	1.30033e-25	ARNT:CYP1B1:NFE2L2:UGT1A9:UGT1A7:UGT1A6:UGT1A4:UGT1A1:SLC2A2:ABCC5:UGT2B7:UGT2B4:AHR:ABCB1:CYP3A5:CYP3A4:CYP2C19:CYP2C9:ABCC2:CDKN1B:ABCC4:CYP1A1:CYP1A2:SULT1A1:CCL2:ABCC3:SULT2A1:SLC5A1	http://www.gsea-msigdb.org/gsea/msigdb/human/geneset/WP_NUCLEAR_RECEPTORS_METAPATHWAY
Canonical_Pathways	REACTOME_TERMINATION_OF_O_GLYCAN_BIOSYNTHESIS	22	13	2.26771e-25	3.18511e-23	MUC1:MUC13:MUC20:MUC4:MUC7:MUC21:MUC12:MUC17:RN7SKP54:MUC6:MUC5AC:MUC5B:MUC15:MUC16	http://www.gsea-msigdb.org/gsea/msigdb/human/geneset/REACTOME_TERMINATION_OF_O_GLYCAN_BIOSYNTHESIS
Canonical_Pathways	WP_CODEINE_AND_MORPHINE_METABOLISM	12	11	2.88567e-25	3.87683e-23	UGT1A10:UGT1A9:UGT1A6:UGT1A1:UGT2B7:UGT2B4:ABCB1:CYP3A4:CYP2C8:ABCC2:ABCC3	http://www.gsea-msigdb.org/gsea/msigdb/human/geneset/WP_CODEINE_AND_MORPHINE_METABOLISM
Canonical_Pathways	WP_ESTROGEN_METABOLISM_WP697	18	12	1.9447e-24	2.5038e-22	CYP1B1:UGT1A8:UGT1A9:UGT1A6:UGT1A3:UGT1A1:UGT2B7:SULT1E1:CYP3A4:CYP1A1:CYP1A2:SULT1A1:COMT	http://www.gsea-msigdb.org/gsea/msigdb/human/geneset/WP_ESTROGEN_METABOLISM_WP697
Canonical_Pathways	REACTOME_DECTIN_2_FAMILY	25	13	2.34208e-24	2.89482e-22	MUC1:MUC13:MUC20:MUC4:MUC7:MUC21:MUC12:MUC17:RN7SKP54:MUC6:MUC5AC:MUC5B:MUC15:MUC16	http://www.gsea-msigdb.org/gsea/msigdb/human/geneset/REACTOME_DECTIN_2_FAMILY
Canonical_Pathways	REACTOME_XENOBIOTICS	21	12	3.0417e-23	3.61495e-21	ARNT:AHR:CYP3A5:CYP3A4:CYP3A43:CYP2C18:CYP2C19:CYP2C9:CYP2C8:CYP2E1:CYP1A1:CYP1A2	http://www.gsea-msigdb.org/gsea/msigdb/human/geneset/REACTOME_XENOBIOTICS
Canonical_Pathways	WP_CONSTITUTIVE_ANDROSTANE_RECEPTOR_PATHWAY	30	13	5.28525e-23	6.04868e-21	UGT1A9:UGT1A6:UGT1A4:UGT1A1:ABCB1:CYP3A5:CYP3A4:CYP2C19:CYP2C9:ABCC2:SULT1A1:ABCC3:SULT2A1	http://www.gsea-msigdb.org/gsea/msigdb/human/geneset/WP_CONSTITUTIVE_ANDROSTANE_RECEPTOR_PATHWAY
Canonical_Pathways	WP_ESTROGEN_METABOLISM_WP5276	22	12	6.66453e-23	7.35479e-21	CYP1B1:UGT1A10:UGT2B7:UGT2A2:SULT1E1:CYP3A5:CYP3A4:CYP2C19:CYP2C9:CYP2C8:CYP1A2:COMT	http://www.gsea-msigdb.org/gsea/msigdb/human/geneset/WP_ESTROGEN_METABOLISM_WP5276
Canonical_Pathways	WP_PREGNANE_X_RECEPTOR_PATHWAY	31	13	9.06549e-23	9.65943e-21	UGT1A9:UGT1A6:UGT1A4:UGT1A1:ABCB1:CYP3A5:CYP3A4:CYP2C19:CYP2C9:ABCC2:ABCC4:ABCC3:SULT2A1	http://www.gsea-msigdb.org/gsea/msigdb/human/geneset/WP_PREGNANE_X_RECEPTOR_PATHWAY
Canonical_Pathways	REACTOME_PHASE_I_FUNCTIONALIZATION_OF_COMPOUNDS	99	16	3.09744e-20	3.19036e-18	ARNT:FMO3:FMO2:FMO1:CYP1B1:AHR:CYP3A5:CYP3A4:CYP3A43:CYP2C18:CYP2C19:CYP2C9:CYP2C8:CYP2E1:CYP1A1:CYP1A2	http://www.gsea-msigdb.org/gsea/msigdb/human/geneset/REACTOME_PHASE_I_FUNCTIONALIZATION_OF_COMPOUNDS
Canonical_Pathways	REACTOME_O_LINKED_GLYCOSYLATION_OF_MUCINS	59	13	1.58767e-18	1.58255e-16	MUC1:MUC13:MUC20:MUC4:MUC7:MUC21:MUC12:MUC17:RN7SKP54:MUC6:MUC5AC:MUC5B:MUC15:MUC16	http://www.gsea-msigdb.org/gsea/msigdb/human/geneset/REACTOME_O_LINKED_GLYCOSYLATION_OF_MUCINS
Canonical_Pathways	REACTOME_CYTOCHROME_P450_ARRANGED_BY_SUBSTRATE_TYPE	60	13	2.0186e-18	1.94921e-16	ARNT:CYP1B1:AHR:CYP3A5:CYP3A4:CYP3A43:CYP2C18:CYP2C19:CYP2C9:CYP2C8:CYP2E1:CYP1A1:CYP1A2	http://www.gsea-msigdb.org/gsea/msigdb/human/geneset/REACTOME_CYTOCHROME_P450_ARRANGED_BY_SUBSTRATE_TYPE
Canonical_Pathways	WP_ARYL_HYDROCARBON_RECEPTOR_PATHWAY_WP2873	45	12	2.69887e-18	2.52713e-16	ARNT:CYP1B1:NFE2L2:UGT1A9:UGT1A7:UGT1A6:UGT1A4:UGT1A1:AHR:CDKN1B:CYP1A1:CYP1A2	http://www.gsea-msigdb.org/gsea/msigdb/human/geneset/WP_ARYL_HYDROCARBON_RECEPTOR_PATHWAY_WP2873
Canonical_Pathways	NABA_ECM_AFFILIATED	162	17	3.90644e-18	3.55027e-16	OVGP1:MUC1:MUC13:MUC20:MUC4:MUC7:EMCN:MUC21:MUC12:MUC17:RN7SKP54:MUC6:MUC2:MUC5AC:MUC5B:MUC15:MUC19:MUC16	http://www.gsea-msigdb.org/gsea/msigdb/human/geneset/NABA_ECM_AFFILIATED
Canonical_Pathways	REACTOME_DISEASES_ASSOCIATED_WITH_O_GLYCOSYLATION_OF_PROTEINS	64	13	5.04957e-18	4.45805e-16	MUC1:MUC13:MUC20:MUC4:MUC7:MUC21:MUC12:MUC17:RN7SKP54:MUC6:MUC5AC:MUC5B:MUC15:MUC16	http://www.gsea-msigdb.org/gsea/msigdb/human/geneset/REACTOME_DISEASES_ASSOCIATED_WITH_O_GLYCOSYLATION_OF_PROTEINS
Canonical_Pathways	REACTOME_DISEASES_OF_METABOLISM	240	19	7.86176e-18	6.74801e-16	MUC1:FMO3:CYP1B1:LCT:UGT1A4:UGT1A1:MUC13:MUC20:MUC4:MUC7:MUC21:GUSB:MUC12:MUC17:RN7SKP54:MUC6:MUC5AC:MUC5B:MUC15:MUC16	http://www.gsea-msigdb.org/gsea/msigdb/human/geneset/REACTOME_DISEASES_OF_METABOLISM
Canonical_Pathways	WP_SULFATION_BIOTRANSFORMATION_REACTION	16	9	1.32133e-17	1.10349e-15	SULT1C2:SULT1C4:SULT1B1:SULT1E1:SULT1A2:SULT1A1:SULT2A1:SULT2B1:SULT4A1	http://www.gsea-msigdb.org/gsea/msigdb/human/geneset/WP_SULFATION_BIOTRANSFORMATION_REACTION
Canonical_Pathways	WP_IRINOTECAN_PATHWAY	11	8	4.24009e-17	3.44786e-15	UGT1A10:UGT1A9:UGT1A1:ABCG2:CYP3A5:CYP3A4:ABCC2:ABCC1	http://www.gsea-msigdb.org/gsea/msigdb/human/geneset/WP_IRINOTECAN_PATHWAY
Canonical_Pathways	REACTOME_CYTOSOLIC_SULFONATION_OF_SMALL_MOLECULES	21	9	3.32631e-16	2.63546e-14	SULT1C2:SULT1C4:SULT1B1:SULT1E1:SULT1A2:SULT1A1:SULT2A1:SULT2B1:SULT4A1	http://www.gsea-msigdb.org/gsea/msigdb/human/geneset/REACTOME_CYTOSOLIC_SULFONATION_OF_SMALL_MOLECULES
Canonical_Pathways	WP_OXIDATION_BY_CYTOCHROME_P450	58	11	4.53746e-15	3.42364e-13	CYP1B1:CYP3A5:CYP3A4:CYP3A43:CYP2C18:CYP2C19:CYP2C9:CYP2C8:CYP2E1:CYP1A1:CYP1A2	http://www.gsea-msigdb.org/gsea/msigdb/human/geneset/WP_OXIDATION_BY_CYTOCHROME_P450
Canonical_Pathways	REACTOME_O_LINKED_GLYCOSYLATION	105	13	4.5427e-15	3.42364e-13	MUC1:MUC13:MUC20:MUC4:MUC7:MUC21:MUC12:MUC17:RN7SKP54:MUC6:MUC5AC:MUC5B:MUC15:MUC16	http://www.gsea-msigdb.org/gsea/msigdb/human/geneset/REACTOME_O_LINKED_GLYCOSYLATION
Canonical_Pathways	KEGG_LINOLEIC_ACID_METABOLISM	27	9	5.17557e-15	3.80774e-13	CYP3A5:CYP3A4:CYP3A43:CYP2C18:CYP2C19:CYP2C9:CYP2C8:CYP2E1:CYP1A2	http://www.gsea-msigdb.org/gsea/msigdb/human/geneset/KEGG_LINOLEIC_ACID_METABOLISM
Canonical_Pathways	REACTOME_C_TYPE_LECTIN_RECEPTORS_CLRS	133	13	1.03663e-13	7.4493e-12	MUC1:MUC13:MUC20:MUC4:MUC7:MUC21:MUC12:MUC17:RN7SKP54:MUC6:MUC5AC:MUC5B:MUC15:MUC16	http://www.gsea-msigdb.org/gsea/msigdb/human/geneset/REACTOME_C_TYPE_LECTIN_RECEPTORS_CLRS
Canonical_Pathways	WP_NRF2_PATHWAY	135	13	1.26004e-13	8.84892e-12	NFE2L2:UGT1A9:UGT1A7:UGT1A6:UGT1A4:UGT1A1:SLC2A2:ABCC5:UGT2B7:ABCC2:ABCC4:ABCC3:SLC5A1	http://www.gsea-msigdb.org/gsea/msigdb/human/geneset/WP_NRF2_PATHWAY
Canonical_Pathways	WP_PROXIMAL_TUBULE_TRANSPORT	55	10	1.30952e-13	8.99206e-12	SLC2A2:ABCG2:SLC22A7:ABCB1:ABCC2:SLC22A6:SLC22A8:SLC22A11:ABCC4:SLC5A1	http://www.gsea-msigdb.org/gsea/msigdb/human/geneset/WP_PROXIMAL_TUBULE_TRANSPORT
Canonical_Pathways	REACTOME_DISEASES_OF_GLYCOSYLATION	137	13	1.5268e-13	1.02561e-11	MUC1:MUC13:MUC20:MUC4:MUC7:MUC21:MUC12:MUC17:RN7SKP54:MUC6:MUC5AC:MUC5B:MUC15:MUC16	http://www.gsea-msigdb.org/gsea/msigdb/human/geneset/REACTOME_DISEASES_OF_GLYCOSYLATION
Canonical_Pathways	REACTOME_SYNTHESIS_OF_16_20_HYDROXYEICOSATETRAENOIC_ACIDS_HETE	8	6	3.37033e-13	2.16965e-11	CYP1B1:CYP2C19:CYP2C9:CYP2C8:CYP1A1:CYP1A2	http://www.gsea-msigdb.org/gsea/msigdb/human/geneset/REACTOME_SYNTHESIS_OF_16_20_HYDROXYEICOSATETRAENOIC_ACIDS_HETE
Canonical_Pathways	REACTOME_SYNTHESIS_OF_EPOXY_EET_AND_DIHYDROXYEICOSATRIENOIC_ACIDS_DHET	8	6	3.37033e-13	2.16965e-11	CYP1B1:CYP2C19:CYP2C9:CYP2C8:CYP1A1:CYP1A2	http://www.gsea-msigdb.org/gsea/msigdb/human/geneset/REACTOME_SYNTHESIS_OF_EPOXY_EET_AND_DIHYDROXYEICOSATRIENOIC_ACIDS_DHET
Canonical_Pathways	WP_CATALYTIC_CYCLE_OF_MAMMALIAN_FLAVINCONTAINING_MONOOXYGENASES_FMOS	5	5	2.58613e-12	1.56689e-10	FMO5:FMO3:FMO2:FMO1:FMO4	http://www.gsea-msigdb.org/gsea/msigdb/human/geneset/WP_CATALYTIC_CYCLE_OF_MAMMALIAN_FLAVINCONTAINING_MONOOXYGENASES_FMOS
Canonical_Pathways	REACTOME_BIOSYNTHESIS_OF_MARESIN_LIKE_SPMS	5	5	2.58613e-12	1.56689e-10	CYP3A4:CYP2C9:CYP2C8:CYP2E1:CYP1A2	http://www.gsea-msigdb.org/gsea/msigdb/human/geneset/REACTOME_BIOSYNTHESIS_OF_MARESIN_LIKE_SPMS
Canonical_Pathways	REACTOME_ORGANIC_ANION_TRANSPORT	5	5	2.58613e-12	1.56689e-10	SLC22A7:SLC22A6:SLC22A8:SLC22A11:SLC22A12	http://www.gsea-msigdb.org/gsea/msigdb/human/geneset/REACTOME_ORGANIC_ANION_TRANSPORT
Canonical_Pathways	BIOCARTA_NUCLEARRS_PATHWAY	33	8	3.2624e-12	1.93862e-10	ABCD3:ABCB1:CYP3A4:CYP2C9:ABCC2:CYP2E1:CYP1A2:ABCC3	http://www.gsea-msigdb.org/gsea/msigdb/human/geneset/BIOCARTA_NUCLEARRS_PATHWAY
Canonical_Pathways	WP_NUCLEAR_RECEPTORS_IN_LIPID_METABOLISM_AND_TOXICITY	34	8	4.24889e-12	2.47718e-10	ABCD3:ABCB1:CYP3A4:CYP2C9:ABCC2:CYP2E1:CYP1A2:ABCC3	http://www.gsea-msigdb.org/gsea/msigdb/human/geneset/WP_NUCLEAR_RECEPTORS_IN_LIPID_METABOLISM_AND_TOXICITY
Canonical_Pathways	WP_ARYLAMINE_METABOLISM	6	5	1.54561e-11	8.84432e-10	UGT1A9:UGT1A4:CYP1A2:SULT1A2:SULT1A1	http://www.gsea-msigdb.org/gsea/msigdb/human/geneset/WP_ARYLAMINE_METABOLISM
Canonical_Pathways	REACTOME_ORGANIC_CATION_ANION_ZWITTERION_TRANSPORT	13	6	2.0247e-11	1.13751e-09	SLC22A5:SLC22A7:SLC22A6:SLC22A8:SLC22A11:SLC22A12	http://www.gsea-msigdb.org/gsea/msigdb/human/geneset/REACTOME_ORGANIC_CATION_ANION_ZWITTERION_TRANSPORT
Canonical_Pathways	REACTOME_TRANSPORT_OF_SMALL_MOLECULES	704	21	3.01666e-11	1.66455e-09	ABCD3:SLC16A1:SLC2A2:ABCC5:ABCG2:SLC22A5:SLC22A7:ABCB1:ABCC2:KCNJ11:SLC22A6:SLC22A8:SLC22A11:SLC22A12:SLC16A7:ABCC4:ABCC1:ABCC3:SLC5A1:SLC16A8:SLC16A2	http://www.gsea-msigdb.org/gsea/msigdb/human/geneset/REACTOME_TRANSPORT_OF_SMALL_MOLECULES
Canonical_Pathways	KEGG_ABC_TRANSPORTERS	43	8	3.27148e-11	1.77349e-09	ABCD3:ABCC5:ABCG2:ABCB1:ABCC2:ABCC4:ABCC1:ABCC3	http://www.gsea-msigdb.org/gsea/msigdb/human/geneset/KEGG_ABC_TRANSPORTERS
Canonical_Pathways	REACTOME_BIOSYNTHESIS_OF_MARESINS	7	5	5.38849e-11	2.87076e-09	CYP3A4:CYP2C9:CYP2C8:CYP2E1:CYP1A2	http://www.gsea-msigdb.org/gsea/msigdb/human/geneset/REACTOME_BIOSYNTHESIS_OF_MARESINS
Canonical_Pathways	WP_DRUG_INDUCTION_OF_BILE_ACID_PATHWAY	17	6	1.4371e-10	7.40107e-09	ABCB1:CYP3A4:ABCC2:ABCC4:ABCC3:SULT2A1	http://www.gsea-msigdb.org/gsea/msigdb/human/geneset/WP_DRUG_INDUCTION_OF_BILE_ACID_PATHWAY
Canonical_Pathways	REACTOME_BIOSYNTHESIS_OF_SPECIALIZED_PRORESOLVING_MEDIATORS_SPMS	17	6	1.4371e-10	7.40107e-09	CYP3A4:CYP2C9:CYP2C8:CYP2E1:CYP1A1:CYP1A2	http://www.gsea-msigdb.org/gsea/msigdb/human/geneset/REACTOME_BIOSYNTHESIS_OF_SPECIALIZED_PRORESOLVING_MEDIATORS_SPMS
Canonical_Pathways	REACTOME_TRANSPORT_OF_BILE_SALTS_AND_ORGANIC_ACIDS_METAL_IONS_AND_AMINE_COMPOUNDS	80	9	2.06257e-10	1.04481e-08	SLC16A1:SLC22A5:SLC22A7:SLC22A6:SLC22A8:SLC22A11:SLC22A12:SLC16A7:SLC16A8	http://www.gsea-msigdb.org/gsea/msigdb/human/geneset/REACTOME_TRANSPORT_OF_BILE_SALTS_AND_ORGANIC_ACIDS_METAL_IONS_AND_AMINE_COMPOUNDS
Canonical_Pathways	NABA_MATRISOME_ASSOCIATED	727	20	3.88407e-10	1.93577e-08	OVGP1:MUC1:MUC13:MUC20:MUC4:MUC7:EMCN:MUC21:MUC12:MUC17:RN7SKP54:SULF1:MUC6:MUC2:MUC5AC:MUC5B:MUC15:MUC19:CCL2:MUC16:SULF2	http://www.gsea-msigdb.org/gsea/msigdb/human/geneset/NABA_MATRISOME_ASSOCIATED
Canonical_Pathways	REACTOME_PREDNISONE_ADME	10	5	6.39065e-10	3.13446e-08	UGT1A8:UGT1A3:UGT2B17:UGT2B7:ABCB1:CYP3A4	http://www.gsea-msigdb.org/gsea/msigdb/human/geneset/REACTOME_PREDNISONE_ADME
Canonical_Pathways	WP_ARYL_HYDROCARBON_RECEPTOR_PATHWAY_WP2586	45	7	2.19636e-09	1.06043e-07	ARNT:CYP1B1:NFE2L2:AHR:CDKN1B:CYP1A1:CYP1A2	http://www.gsea-msigdb.org/gsea/msigdb/human/geneset/WP_ARYL_HYDROCARBON_RECEPTOR_PATHWAY_WP2586
Canonical_Pathways	REACTOME_SLC_MEDIATED_TRANSMEMBRANE_TRANSPORT	239	12	2.32853e-09	1.10695e-07	SLC16A1:SLC2A2:SLC22A5:SLC22A7:SLC22A6:SLC22A8:SLC22A11:SLC22A12:SLC16A7:SLC5A1:SLC16A8:SLC16A2	http://www.gsea-msigdb.org/gsea/msigdb/human/geneset/REACTOME_SLC_MEDIATED_TRANSMEMBRANE_TRANSPORT
Canonical_Pathways	REACTOME_PYRUVATE_METABOLISM	30	6	6.5463e-09	3.06486e-07	SLC16A1:LDHA:LDHB:SLC16A8:PDHA1:PDK3	http://www.gsea-msigdb.org/gsea/msigdb/human/geneset/REACTOME_PYRUVATE_METABOLISM
Canonical_Pathways	REACTOME_HEME_DEGRADATION	15	5	7.46789e-09	3.44415e-07	UGT1A4:UGT1A1:ABCG2:ABCC2:ABCC1	http://www.gsea-msigdb.org/gsea/msigdb/human/geneset/REACTOME_HEME_DEGRADATION
Canonical_Pathways	REACTOME_ARACHIDONIC_ACID_METABOLISM	55	7	9.43308e-09	4.2865e-07	CYP1B1:CYP2C19:CYP2C9:CYP2C8:CYP1A1:CYP1A2:ABCC1	http://www.gsea-msigdb.org/gsea/msigdb/human/geneset/REACTOME_ARACHIDONIC_ACID_METABOLISM
Canonical_Pathways	REACTOME_ABC_FAMILY_PROTEINS_MEDIATED_TRANSPORT	101	8	3.60165e-08	1.61291e-06	ABCD3:ABCC5:ABCB1:ABCC2:KCNJ11:ABCC4:ABCC1:ABCC3	http://www.gsea-msigdb.org/gsea/msigdb/human/geneset/REACTOME_ABC_FAMILY_PROTEINS_MEDIATED_TRANSPORT
Canonical_Pathways	WP_PHOTODYNAMIC_THERAPYINDUCED_NFE2L2_NRF2_SURVIVAL_SIGNALING	21	5	4.94297e-08	2.18197e-06	NFE2L2:ABCG2:ABCC2:ABCC4:ABCC3	http://www.gsea-msigdb.org/gsea/msigdb/human/geneset/WP_PHOTODYNAMIC_THERAPYINDUCED_NFE2L2_NRF2_SURVIVAL_SIGNALING
Canonical_Pathways	REACTOME_ATORVASTATIN_ADME	9	4	6.75579e-08	2.94019e-06	UGT1A8:UGT1A3:ABCB1:CYP3A4:ABCC2	http://www.gsea-msigdb.org/gsea/msigdb/human/geneset/REACTOME_ATORVASTATIN_ADME
Canonical_Pathways	NABA_MATRISOME	993	20	7.37831e-08	3.16653e-06	OVGP1:MUC1:MUC13:MUC20:MUC4:MUC7:EMCN:MUC21:MUC12:MUC17:RN7SKP54:SULF1:MUC6:MUC2:MUC5AC:MUC5B:MUC15:MUC19:CCL2:MUC16:SULF2	http://www.gsea-msigdb.org/gsea/msigdb/human/geneset/NABA_MATRISOME
Canonical_Pathways	REACTOME_CYP2E1_REACTIONS	10	4	1.1217e-07	4.74803e-06	CYP2C19:CYP2C9:CYP2C8:CYP2E1	http://www.gsea-msigdb.org/gsea/msigdb/human/geneset/REACTOME_CYP2E1_REACTIONS
Canonical_Pathways	KEGG_SULFUR_METABOLISM	11	4	1.75601e-07	7.33252e-06	SULT1E1:SULT1A2:SULT1A1:SULT2B1	http://www.gsea-msigdb.org/gsea/msigdb/human/geneset/KEGG_SULFUR_METABOLISM
Canonical_Pathways	REACTOME_METABOLISM_OF_PORPHYRINS	27	5	1.91552e-07	7.89193e-06	UGT1A4:UGT1A1:ABCG2:ABCC2:ABCC1	http://www.gsea-msigdb.org/gsea/msigdb/human/geneset/REACTOME_METABOLISM_OF_PORPHYRINS
Canonical_Pathways	WP_VITAMIN_D_RECEPTOR_PATHWAY	178	9	2.39987e-07	9.75738e-06	SULT1C2:ABCB1:CYP3A5:CYP3A4:CYP2C9:CDKN1B:HIF1A:CYP1A1:SULT2A1	http://www.gsea-msigdb.org/gsea/msigdb/human/geneset/WP_VITAMIN_D_RECEPTOR_PATHWAY
Canonical_Pathways	REACTOME_PYRUVATE_METABOLISM_AND_CITRIC_ACID_TCA_CYCLE	54	6	2.58755e-07	1.03838e-05	SLC16A1:LDHA:LDHB:SLC16A8:PDHA1:PDK3	http://www.gsea-msigdb.org/gsea/msigdb/human/geneset/REACTOME_PYRUVATE_METABOLISM_AND_CITRIC_ACID_TCA_CYCLE
Canonical_Pathways	WP_CANNABINOID_RECEPTOR_SIGNALING	29	5	2.7958e-07	1.10757e-05	AHR:CYP3A4:CYP2C19:CYP2C9:CYP1A1	http://www.gsea-msigdb.org/gsea/msigdb/human/geneset/WP_CANNABINOID_RECEPTOR_SIGNALING
Canonical_Pathways	WP_FATTY_ACID_OMEGAOXIDATION	13	4	3.77596e-07	1.47693e-05	CYP3A4:CYP2E1:CYP1A1:CYP1A2	http://www.gsea-msigdb.org/gsea/msigdb/human/geneset/WP_FATTY_ACID_OMEGAOXIDATION
Canonical_Pathways	WP_FLUOROPYRIMIDINE_ACTIVITY	31	5	3.96899e-07	1.53302e-05	ABCC5:ABCG2:SLC22A7:ABCC4:ABCC3	http://www.gsea-msigdb.org/gsea/msigdb/human/geneset/WP_FLUOROPYRIMIDINE_ACTIVITY
Canonical_Pathways	REACTOME_METABOLISM_OF_LIPIDS	718	16	4.5387e-07	1.73143e-05	ARNT:CYP1B1:UGT1A9:UGT8:SLC22A5:AHR:CYP3A4:CYP2C19:CYP2C9:CYP2C8:CYP2E1:CYP1A1:CYP1A2:ABCC1:ABCC3:SULT2A1	http://www.gsea-msigdb.org/gsea/msigdb/human/geneset/REACTOME_METABOLISM_OF_LIPIDS
Canonical_Pathways	REACTOME_INNATE_IMMUNE_SYSTEM	1012	19	4.75439e-07	1.79159e-05	MUC1:TLR5:MYD88:MUC13:MUC20:MUC4:MUC7:TLR2:MUC21:GUSB:MUC12:MUC17:RN7SKP54:TLR4:MUC6:MUC5AC:MUC5B:MUC15:NOD2:MUC16	http://www.gsea-msigdb.org/gsea/msigdb/human/geneset/REACTOME_INNATE_IMMUNE_SYSTEM
Canonical_Pathways	WP_MELATONIN_METABOLISM_AND_EFFECTS	34	5	6.42406e-07	2.39161e-05	CYP1B1:CYP2C19:CYP1A1:CYP1A2:SULT1A1	http://www.gsea-msigdb.org/gsea/msigdb/human/geneset/WP_MELATONIN_METABOLISM_AND_EFFECTS
Canonical_Pathways	WP_BURN_WOUND_HEALING	105	7	8.64814e-07	3.1547e-05	TLR5:MYD88:TLR2:TLR4:AKT1:NOD2:CCL2	http://www.gsea-msigdb.org/gsea/msigdb/human/geneset/WP_BURN_WOUND_HEALING
Canonical_Pathways	PID_HIF1_TFPATHWAY	66	6	8.67797e-07	3.1547e-05	ARNT:ABCG2:ABCB1:LDHA:HIF1A:AKT1	http://www.gsea-msigdb.org/gsea/msigdb/human/geneset/PID_HIF1_TFPATHWAY
Canonical_Pathways	WP_PHOTODYNAMIC_THERAPYINDUCED_HIF1_SURVIVAL_SIGNALING	37	5	9.9462e-07	3.57369e-05	SLC16A1:ARNT:LDHA:HIF1A:PDHA1	http://www.gsea-msigdb.org/gsea/msigdb/human/geneset/WP_PHOTODYNAMIC_THERAPYINDUCED_HIF1_SURVIVAL_SIGNALING
Canonical_Pathways	REACTOME_PROTON_COUPLED_MONOCARBOXYLATE_TRANSPORT	5	3	1.13651e-06	4.03657e-05	SLC16A1:SLC16A7:SLC16A8	http://www.gsea-msigdb.org/gsea/msigdb/human/geneset/REACTOME_PROTON_COUPLED_MONOCARBOXYLATE_TRANSPORT
Canonical_Pathways	WP_MYD88_DISTINCT_INPUTOUTPUT_PATHWAY	17	4	1.23799e-06	4.29819e-05	TLR5:MYD88:TLR2:TLR4	http://www.gsea-msigdb.org/gsea/msigdb/human/geneset/WP_MYD88_DISTINCT_INPUTOUTPUT_PATHWAY
Canonical_Pathways	REACTOME_AFLATOXIN_ACTIVATION_AND_DETOXIFICATION	17	4	1.23799e-06	4.29819e-05	AKR7A2:CYP3A5:CYP3A4:CYP1A2	http://www.gsea-msigdb.org/gsea/msigdb/human/geneset/REACTOME_AFLATOXIN_ACTIVATION_AND_DETOXIFICATION
Canonical_Pathways	REACTOME_FATTY_ACID_METABOLISM	169	8	1.88604e-06	6.47539e-05	CYP1B1:SLC22A5:CYP2C19:CYP2C9:CYP2C8:CYP1A1:CYP1A2:ABCC1	http://www.gsea-msigdb.org/gsea/msigdb/human/geneset/REACTOME_FATTY_ACID_METABOLISM
Canonical_Pathways	BIOCARTA_MRP_PATHWAY	6	3	2.26489e-06	7.60707e-05	ABCB1:ABCC1:ABCC3	http://www.gsea-msigdb.org/gsea/msigdb/human/geneset/BIOCARTA_MRP_PATHWAY
Canonical_Pathways	WP_NICOTINE_METABOLISM_IN_LIVER_CELLS	6	3	2.26489e-06	7.60707e-05	FMO3:UGT1A9:UGT1A4	http://www.gsea-msigdb.org/gsea/msigdb/human/geneset/WP_NICOTINE_METABOLISM_IN_LIVER_CELLS
Canonical_Pathways	WP_HEREDITARY_LEIOMYOMATOSIS_AND_RENAL_CELL_CARCINOMA_PATHWAY	20	4	2.49172e-06	8.27896e-05	NFE2L2:LDHA:HIF1A:PDHA1	http://www.gsea-msigdb.org/gsea/msigdb/human/geneset/WP_HEREDITARY_LEIOMYOMATOSIS_AND_RENAL_CELL_CARCINOMA_PATHWAY
Canonical_Pathways	WP_AFLATOXIN_B1_METABOLISM	7	3	3.94937e-06	0.000129825	AKR7A2:CYP3A4:CYP1A2	http://www.gsea-msigdb.org/gsea/msigdb/human/geneset/WP_AFLATOXIN_B1_METABOLISM
Canonical_Pathways	WP_BENZOAPYRENE_METABOLISM	8	3	6.29639e-06	0.000204798	CYP1B1:CYP3A4:CYP1A1	http://www.gsea-msigdb.org/gsea/msigdb/human/geneset/WP_BENZOAPYRENE_METABOLISM
Canonical_Pathways	KEGG_ARACHIDONIC_ACID_METABOLISM	54	5	6.75265e-06	0.000217351	CYP2C18:CYP2C19:CYP2C9:CYP2C8:CYP2E1	http://www.gsea-msigdb.org/gsea/msigdb/human/geneset/KEGG_ARACHIDONIC_ACID_METABOLISM
Canonical_Pathways	WP_TOLLLIKE_RECEPTOR_SIGNALING_RELATED_TO_MYD88	30	4	1.35708e-05	0.000432306	TLR5:MYD88:TLR2:TLR4	http://www.gsea-msigdb.org/gsea/msigdb/human/geneset/WP_TOLLLIKE_RECEPTOR_SIGNALING_RELATED_TO_MYD88
Canonical_Pathways	REACTOME_DISEASES_OF_IMMUNE_SYSTEM	31	4	1.55224e-05	0.000489432	TLR5:MYD88:TLR2:TLR4	http://www.gsea-msigdb.org/gsea/msigdb/human/geneset/REACTOME_DISEASES_OF_IMMUNE_SYSTEM
Canonical_Pathways	REACTOME_METABOLIC_DISORDERS_OF_BIOLOGICAL_OXIDATION_ENZYMES	33	4	2.00348e-05	0.000625328	FMO3:CYP1B1:UGT1A4:UGT1A1	http://www.gsea-msigdb.org/gsea/msigdb/human/geneset/REACTOME_METABOLIC_DISORDERS_OF_BIOLOGICAL_OXIDATION_ENZYMES
Canonical_Pathways	REACTOME_DISORDERS_OF_TRANSMEMBRANE_TRANSPORTERS	175	7	2.53188e-05	0.000782351	SLC16A1:SLC2A2:SLC22A5:ABCC2:KCNJ11:SLC22A12:SLC5A1	http://www.gsea-msigdb.org/gsea/msigdb/human/geneset/REACTOME_DISORDERS_OF_TRANSMEMBRANE_TRANSPORTERS
Canonical_Pathways	WP_ESTROGEN_RECEPTOR_PATHWAY	13	3	3.15859e-05	0.00096634	CYP1B1:CYP1A1:CYP1A2	http://www.gsea-msigdb.org/gsea/msigdb/human/geneset/WP_ESTROGEN_RECEPTOR_PATHWAY
Canonical_Pathways	BIOCARTA_HIF_PATHWAY	15	3	4.98918e-05	0.00151143	ARNT:LDHA:HIF1A	http://www.gsea-msigdb.org/gsea/msigdb/human/geneset/BIOCARTA_HIF_PATHWAY
Canonical_Pathways	WP_METABOLIC_REPROGRAMMING_IN_PANCREATIC_CANCER	42	4	5.29701e-05	0.00157382	SLC16A4:SLC16A1:LDHA:PDHA1	http://www.gsea-msigdb.org/gsea/msigdb/human/geneset/WP_METABOLIC_REPROGRAMMING_IN_PANCREATIC_CANCER
Canonical_Pathways	WP_FIBRIN_COMPLEMENT_RECEPTOR_3_SIGNALING_PATHWAY	42	4	5.29701e-05	0.00157382	MYD88:TLR4:AKT1:CCL2	http://www.gsea-msigdb.org/gsea/msigdb/human/geneset/WP_FIBRIN_COMPLEMENT_RECEPTOR_3_SIGNALING_PATHWAY
Canonical_Pathways	WP_INFLAMMATORY_BOWEL_DISEASE_SIGNALING	43	4	5.81829e-05	0.00170955	TLR5:TLR2:TLR4:NOD2	http://www.gsea-msigdb.org/gsea/msigdb/human/geneset/WP_INFLAMMATORY_BOWEL_DISEASE_SIGNALING
Canonical_Pathways	WP_CLEAR_CELL_RENAL_CELL_CARCINOMA_PATHWAYS	84	5	5.86447e-05	0.00170955	ARNT:LDHA:LDHB:HIF1A:AKT1	http://www.gsea-msigdb.org/gsea/msigdb/human/geneset/WP_CLEAR_CELL_RENAL_CELL_CARCINOMA_PATHWAYS
Canonical_Pathways	WP_2Q37_COPY_NUMBER_VARIATION_SYNDROME	141	6	6.94646e-05	0.00199468	UGT1A10:UGT1A9:UGT1A7:UGT1A6:UGT1A4:UGT1A1	http://www.gsea-msigdb.org/gsea/msigdb/human/geneset/WP_2Q37_COPY_NUMBER_VARIATION_SYNDROME
Canonical_Pathways	WP_GLYCOLYSIS_AND_GLUCONEOGENESIS	45	4	6.97169e-05	0.00199468	SLC2A2:LDHA:LDHB:PDHA1	http://www.gsea-msigdb.org/gsea/msigdb/human/geneset/WP_GLYCOLYSIS_AND_GLUCONEOGENESIS
Canonical_Pathways	WP_PLATELETMEDIATED_INTERACTIONS_WITH_VASCULAR_AND_CIRCULATING_CELLS	17	3	7.4032e-05	0.00209871	TLR2:TLR4:CCL2	http://www.gsea-msigdb.org/gsea/msigdb/human/geneset/WP_PLATELETMEDIATED_INTERACTIONS_WITH_VASCULAR_AND_CIRCULATING_CELLS
Canonical_Pathways	REACTOME_IRAK4_DEFICIENCY_TLR2_4	18	3	8.85213e-05	0.00248664	MYD88:TLR2:TLR4	http://www.gsea-msigdb.org/gsea/msigdb/human/geneset/REACTOME_IRAK4_DEFICIENCY_TLR2_4
Canonical_Pathways	WP_LTF_DANGER_SIGNAL_RESPONSE_PATHWAY	19	3	0.000104744	0.00286424	MYD88:TLR2:TLR4	http://www.gsea-msigdb.org/gsea/msigdb/human/geneset/WP_LTF_DANGER_SIGNAL_RESPONSE_PATHWAY
Canonical_Pathways	WP_FARNESOID_X_RECEPTOR_PATHWAY	19	3	0.000104744	0.00286424	UGT2B4:CYP3A4:SULT2A1	http://www.gsea-msigdb.org/gsea/msigdb/human/geneset/WP_FARNESOID_X_RECEPTOR_PATHWAY
Canonical_Pathways	WP_CHOLESTASIS	19	3	0.000104744	0.00286424	ABCC2:ABCC4:ABCC3	http://www.gsea-msigdb.org/gsea/msigdb/human/geneset/WP_CHOLESTASIS
Canonical_Pathways	BIOCARTA_P53HYPOXIA_PATHWAY	20	3	0.000122788	0.00329927	ABCB1:HIF1A:AKT1	http://www.gsea-msigdb.org/gsea/msigdb/human/geneset/BIOCARTA_P53HYPOXIA_PATHWAY
Canonical_Pathways	WP_IMATINIB_AND_CHRONIC_MYELOID_LEUKEMIA	20	3	0.000122788	0.00329927	ABCG2:ABCB1:CDKN1B	http://www.gsea-msigdb.org/gsea/msigdb/human/geneset/WP_IMATINIB_AND_CHRONIC_MYELOID_LEUKEMIA
Canonical_Pathways	REACTOME_SLC_TRANSPORTER_DISORDERS	99	5	0.000128165	0.00341405	SLC16A1:SLC2A2:SLC22A5:SLC22A12:SLC5A1	http://www.gsea-msigdb.org/gsea/msigdb/human/geneset/REACTOME_SLC_TRANSPORTER_DISORDERS
Canonical_Pathways	KEGG_TOLL_LIKE_RECEPTOR_SIGNALING_PATHWAY	100	5	0.000134387	0.0035492	TLR5:MYD88:TLR2:TLR4:AKT1	http://www.gsea-msigdb.org/gsea/msigdb/human/geneset/KEGG_TOLL_LIKE_RECEPTOR_SIGNALING_PATHWAY
Canonical_Pathways	REACTOME_THE_CITRIC_ACID_TCA_CYCLE_AND_RESPIRATORY_ELECTRON_TRANSPORT	160	6	0.000139343	0.00364523	SLC16A1:LDHA:LDHB:SLC16A8:PDHA1:PDK3	http://www.gsea-msigdb.org/gsea/msigdb/human/geneset/REACTOME_THE_CITRIC_ACID_TCA_CYCLE_AND_RESPIRATORY_ELECTRON_TRANSPORT
Canonical_Pathways	WP_TOLLLIKE_RECEPTOR_SIGNALING_PATHWAY	101	5	0.000140838	0.00364523	TLR5:MYD88:TLR2:TLR4:AKT1	http://www.gsea-msigdb.org/gsea/msigdb/human/geneset/WP_TOLLLIKE_RECEPTOR_SIGNALING_PATHWAY
Canonical_Pathways	REACTOME_INTESTINAL_ABSORPTION	4	2	0.000141738	0.00364523	SLC2A2:SLC5A1	http://www.gsea-msigdb.org/gsea/msigdb/human/geneset/REACTOME_INTESTINAL_ABSORPTION
Canonical_Pathways	WP_FOXA2_PATHWAY	21	3	0.000142742	0.00364523	ABCC2:ABCC4:ABCC3	http://www.gsea-msigdb.org/gsea/msigdb/human/geneset/WP_FOXA2_PATHWAY
Canonical_Pathways	REACTOME_BASIGIN_INTERACTIONS	22	3	0.000164691	0.00413735	SLC16A1:ITGA6:SLC16A8	http://www.gsea-msigdb.org/gsea/msigdb/human/geneset/REACTOME_BASIGIN_INTERACTIONS
Canonical_Pathways	WP_PI3KAKTMTOR_VITAMIN_D3_SIGNALING	22	3	0.000164691	0.00413735	LDHA:AKT1:PDHA1	http://www.gsea-msigdb.org/gsea/msigdb/human/geneset/WP_PI3KAKTMTOR_VITAMIN_D3_SIGNALING
Canonical_Pathways	WP_LDL_INFLUENCE_ON_CD14_AND_TLR4	23	3	0.000188719	0.00466513	TLR4:AKT1:CCL2	http://www.gsea-msigdb.org/gsea/msigdb/human/geneset/WP_LDL_INFLUENCE_ON_CD14_AND_TLR4
Canonical_Pathways	PID_TOLL_ENDOGENOUS_PATHWAY	23	3	0.000188719	0.00466513	MYD88:TLR2:TLR4	http://www.gsea-msigdb.org/gsea/msigdb/human/geneset/PID_TOLL_ENDOGENOUS_PATHWAY
Canonical_Pathways	REACTOME_DIGESTION_AND_ABSORPTION	24	3	0.00021491	0.00518806	LCT:SLC2A2:SLC5A1	http://www.gsea-msigdb.org/gsea/msigdb/human/geneset/REACTOME_DIGESTION_AND_ABSORPTION
Canonical_Pathways	WP_IL1_AND_MEGAKARYOCYTES_IN_OBESITY	24	3	0.00021491	0.00518806	MYD88:TLR2:CCL2	http://www.gsea-msigdb.org/gsea/msigdb/human/geneset/WP_IL1_AND_MEGAKARYOCYTES_IN_OBESITY
Canonical_Pathways	WP_ANGIOGENESIS	24	3	0.00021491	0.00518806	ARNT:HIF1A:AKT1	http://www.gsea-msigdb.org/gsea/msigdb/human/geneset/WP_ANGIOGENESIS
Canonical_Pathways	REACTOME_REGULATION_OF_LIPID_METABOLISM_BY_PPARALPHA	112	5	0.000228555	0.00547075	ARNT:UGT1A9:AHR:CYP1A1:SULT2A1	http://www.gsea-msigdb.org/gsea/msigdb/human/geneset/REACTOME_REGULATION_OF_LIPID_METABOLISM_BY_PPARALPHA
Canonical_Pathways	REACTOME_ABACAVIR_TRANSMEMBRANE_TRANSPORT	5	2	0.000235472	0.00547075	ABCG2:ABCB1	http://www.gsea-msigdb.org/gsea/msigdb/human/geneset/REACTOME_ABACAVIR_TRANSMEMBRANE_TRANSPORT
Canonical_Pathways	BIOCARTA_ACETAMINOPHEN_PATHWAY	5	2	0.000235472	0.00547075	CYP2E1:CYP1A2	http://www.gsea-msigdb.org/gsea/msigdb/human/geneset/BIOCARTA_ACETAMINOPHEN_PATHWAY
Canonical_Pathways	WP_SULINDAC_METABOLIC_PATHWAY	5	2	0.000235472	0.00547075	CYP1B1:CYP1A2	http://www.gsea-msigdb.org/gsea/msigdb/human/geneset/WP_SULINDAC_METABOLIC_PATHWAY
Canonical_Pathways	REACTOME_CIPROFLOXACIN_ADME	5	2	0.000235472	0.00547075	ABCG2:SLC22A8	http://www.gsea-msigdb.org/gsea/msigdb/human/geneset/REACTOME_CIPROFLOXACIN_ADME
Canonical_Pathways	REACTOME_ENDOGENOUS_STEROLS	26	3	0.000274106	0.00632079	ARNT:CYP1B1:AHR	http://www.gsea-msigdb.org/gsea/msigdb/human/geneset/REACTOME_ENDOGENOUS_STEROLS
Canonical_Pathways	WP_ONCOSTATIN_M_SIGNALING_PATHWAY	65	4	0.000293796	0.00672466	CDKN1B:HIF1A:AKT1:CCL2	http://www.gsea-msigdb.org/gsea/msigdb/human/geneset/WP_ONCOSTATIN_M_SIGNALING_PATHWAY
Canonical_Pathways	REACTOME_ARYL_HYDROCARBON_RECEPTOR_SIGNALLING	6	2	0.000352076	0.00799938	ARNT:AHR	http://www.gsea-msigdb.org/gsea/msigdb/human/geneset/REACTOME_ARYL_HYDROCARBON_RECEPTOR_SIGNALLING
Canonical_Pathways	WP_TYPE_I_INTERFERON_INDUCTION_AND_SIGNALING_DURING_SARSCOV2_INFECTION	31	3	0.000465508	0.0104994	MYD88:TLR2:TLR4	http://www.gsea-msigdb.org/gsea/msigdb/human/geneset/WP_TYPE_I_INTERFERON_INDUCTION_AND_SIGNALING_DURING_SARSCOV2_INFECTION
Canonical_Pathways	WP_NONGENOMIC_ACTIONS_OF_125_DIHYDROXYVITAMIN_D3	74	4	0.000482684	0.0108079	TLR2:TLR4:NOD2:CCL2	http://www.gsea-msigdb.org/gsea/msigdb/human/geneset/WP_NONGENOMIC_ACTIONS_OF_125_DIHYDROXYVITAMIN_D3
Canonical_Pathways	WP_ARACHIDONATE_EPOXYGENASE_EPOXIDE_HYDROLASE	7	2	0.000491327	0.0109223	CYP2C9:CYP2C8	http://www.gsea-msigdb.org/gsea/msigdb/human/geneset/WP_ARACHIDONATE_EPOXYGENASE_EPOXIDE_HYDROLASE
Canonical_Pathways	WP_OXIDATIVE_STRESS_RESPONSE	32	3	0.000511835	0.0112969	NFE2L2:UGT1A6:CYP1A1	http://www.gsea-msigdb.org/gsea/msigdb/human/geneset/WP_OXIDATIVE_STRESS_RESPONSE
Canonical_Pathways	WP_MALE_INFERTILITY	134	5	0.000522264	0.0114454	NFE2L2:AHR:ABCB1:SLC16A7:CYP1A1	http://www.gsea-msigdb.org/gsea/msigdb/human/geneset/WP_MALE_INFERTILITY
Canonical_Pathways	WP_EICOSANOID_METABOLISM_VIA_CYTOCHROME_P450_MONOOXYGENASES_PATHWAY	8	2	0.000653004	0.0140124	CYP2C18:CYP2C8	http://www.gsea-msigdb.org/gsea/msigdb/human/geneset/WP_EICOSANOID_METABOLISM_VIA_CYTOCHROME_P450_MONOOXYGENASES_PATHWAY
Canonical_Pathways	WP_HIF1A_AND_PPARG_REGULATION_OF_GLYCOLYSIS	8	2	0.000653004	0.0140124	LDHA:HIF1A	http://www.gsea-msigdb.org/gsea/msigdb/human/geneset/WP_HIF1A_AND_PPARG_REGULATION_OF_GLYCOLYSIS
Canonical_Pathways	WP_GLUCOSE_METABOLISM_IN_TRIPLENEGATIVE_BREAST_CANCER_CELLS	8	2	0.000653004	0.0140124	SLC16A1:LDHA	http://www.gsea-msigdb.org/gsea/msigdb/human/geneset/WP_GLUCOSE_METABOLISM_IN_TRIPLENEGATIVE_BREAST_CANCER_CELLS
Canonical_Pathways	WP_ACUTE_VIRAL_MYOCARDITIS	85	4	0.00081501	0.0173556	TLR5:TLR4:AKT1:NOD2	http://www.gsea-msigdb.org/gsea/msigdb/human/geneset/WP_ACUTE_VIRAL_MYOCARDITIS
Canonical_Pathways	WP_APOE_AND_MIR146_IN_INFLAMMATION_AND_ATHEROSCLEROSIS	9	2	0.000836887	0.0173556	TLR2:TLR4	http://www.gsea-msigdb.org/gsea/msigdb/human/geneset/WP_APOE_AND_MIR146_IN_INFLAMMATION_AND_ATHEROSCLEROSIS
Canonical_Pathways	REACTOME_ABACAVIR_ADME	9	2	0.000836887	0.0173556	ABCG2:ABCB1	http://www.gsea-msigdb.org/gsea/msigdb/human/geneset/REACTOME_ABACAVIR_ADME
Canonical_Pathways	WP_MINERALOCORTICOID_BIOSYNTHESIS	9	2	0.000836887	0.0173556	UGT1A10:UGT2B7	http://www.gsea-msigdb.org/gsea/msigdb/human/geneset/WP_MINERALOCORTICOID_BIOSYNTHESIS
Canonical_Pathways	WP_ETHANOL_METABOLISM_PRODUCTION_OF_ROS_BY_CYP2E1	9	2	0.000836887	0.0173556	NFE2L2:CYP2E1	http://www.gsea-msigdb.org/gsea/msigdb/human/geneset/WP_ETHANOL_METABOLISM_PRODUCTION_OF_ROS_BY_CYP2E1
Canonical_Pathways	KEGG_PYRUVATE_METABOLISM	39	3	0.00091985	0.0189489	LDHA:LDHB:PDHA1	http://www.gsea-msigdb.org/gsea/msigdb/human/geneset/KEGG_PYRUVATE_METABOLISM
Canonical_Pathways	REACTOME_POST_TRANSLATIONAL_PROTEIN_MODIFICATION	1361	16	0.000988102	0.0201439	MUC1:NFE2L2:MUC13:MUC20:MUC4:MUC7:MUC21:MUC12:MUC17:RN7SKP54:MUC6:MUC5AC:MUC5B:MUC15:HIF1A:NOD2:MUC16	http://www.gsea-msigdb.org/gsea/msigdb/human/geneset/REACTOME_POST_TRANSLATIONAL_PROTEIN_MODIFICATION
Canonical_Pathways	KEGG_TRYPTOPHAN_METABOLISM	40	3	0.000990899	0.0201439	CYP1B1:CYP1A1:CYP1A2	http://www.gsea-msigdb.org/gsea/msigdb/human/geneset/KEGG_TRYPTOPHAN_METABOLISM
Canonical_Pathways	BIOCARTA_EPONFKB_PATHWAY	10	2	0.00104276	0.0209229	ARNT:HIF1A	http://www.gsea-msigdb.org/gsea/msigdb/human/geneset/BIOCARTA_EPONFKB_PATHWAY
Canonical_Pathways	WP_LNCRNAMEDIATED_MECHANISMS_OF_THERAPEUTIC_RESISTANCE	10	2	0.00104276	0.0209229	ABCB1:HIF1A	http://www.gsea-msigdb.org/gsea/msigdb/human/geneset/WP_LNCRNAMEDIATED_MECHANISMS_OF_THERAPEUTIC_RESISTANCE
Canonical_Pathways	WP_VITAMIN_A_AND_CAROTENOID_METABOLISM	41	3	0.00106533	0.0212379	CYP2E1:SULT1A1:SULT2B1	http://www.gsea-msigdb.org/gsea/msigdb/human/geneset/WP_VITAMIN_A_AND_CAROTENOID_METABOLISM
Canonical_Pathways	REACTOME_TOLL_LIKE_RECEPTOR_CASCADES	160	5	0.00116049	0.0229865	TLR5:MYD88:TLR2:TLR4:NOD2	http://www.gsea-msigdb.org/gsea/msigdb/human/geneset/REACTOME_TOLL_LIKE_RECEPTOR_CASCADES
Canonical_Pathways	REACTOME_REGULATION_OF_GENE_EXPRESSION_BY_HYPOXIA_INDUCIBLE_FACTOR	11	2	0.00127041	0.0250035	ARNT:HIF1A	http://www.gsea-msigdb.org/gsea/msigdb/human/geneset/REACTOME_REGULATION_OF_GENE_EXPRESSION_BY_HYPOXIA_INDUCIBLE_FACTOR
Canonical_Pathways	PID_HNF3B_PATHWAY	44	3	0.00130952	0.0256102	SLC2A2:KCNJ11:AKT1	http://www.gsea-msigdb.org/gsea/msigdb/human/geneset/PID_HNF3B_PATHWAY
Canonical_Pathways	PID_HES_HEY_PATHWAY	48	3	0.00168602	0.0327661	ARNT:CDKN1B:HIF1A	http://www.gsea-msigdb.org/gsea/msigdb/human/geneset/PID_HES_HEY_PATHWAY
Canonical_Pathways	REACTOME_INTERLEUKIN_4_AND_INTERLEUKIN_13_SIGNALING	105	4	0.00178516	0.0337292	MUC1:HIF1A:AKT1:CCL2	http://www.gsea-msigdb.org/gsea/msigdb/human/geneset/REACTOME_INTERLEUKIN_4_AND_INTERLEUKIN_13_SIGNALING
Canonical_Pathways	REACTOME_METHYLATION	13	2	0.00179016	0.0337292	CYP1A2:COMT	http://www.gsea-msigdb.org/gsea/msigdb/human/geneset/REACTOME_METHYLATION
Canonical_Pathways	WP_DISORDERS_OF_GALACTOSE_METABOLISM	13	2	0.00179016	0.0337292	SLC2A2:SLC5A1	http://www.gsea-msigdb.org/gsea/msigdb/human/geneset/WP_DISORDERS_OF_GALACTOSE_METABOLISM
Canonical_Pathways	WP_KREBS_CYCLE_DISORDERS	13	2	0.00179016	0.0337292	LDHA:LDHB	http://www.gsea-msigdb.org/gsea/msigdb/human/geneset/WP_KREBS_CYCLE_DISORDERS
Canonical_Pathways	WP_MODULATION_OF_PI3KAKTMTOR_SIGNALING_BY_BIOACTIVE_SPHINGOLIPIDS	13	2	0.00179016	0.0337292	HIF1A:AKT1	http://www.gsea-msigdb.org/gsea/msigdb/human/geneset/WP_MODULATION_OF_PI3KAKTMTOR_SIGNALING_BY_BIOACTIVE_SPHINGOLIPIDS
Canonical_Pathways	REACTOME_AKT_PHOSPHORYLATES_TARGETS_IN_THE_CYTOSOL	14	2	0.00208184	0.0387524	CDKN1B:AKT1	http://www.gsea-msigdb.org/gsea/msigdb/human/geneset/REACTOME_AKT_PHOSPHORYLATES_TARGETS_IN_THE_CYTOSOL
Canonical_Pathways	WP_DISORDERS_OF_FRUCTOSE_METABOLISM	14	2	0.00208184	0.0387524	SLC2A2:SLC5A1	http://www.gsea-msigdb.org/gsea/msigdb/human/geneset/WP_DISORDERS_OF_FRUCTOSE_METABOLISM
Canonical_Pathways	WP_IL1_SIGNALING_PATHWAY	52	3	0.00212393	0.0392991	MYD88:AKT1:CCL2	http://www.gsea-msigdb.org/gsea/msigdb/human/geneset/WP_IL1_SIGNALING_PATHWAY
Canonical_Pathways	REACTOME_TOLL_LIKE_RECEPTOR_TLR1_TLR2_CASCADE	112	4	0.00225945	0.0415578	MYD88:TLR2:TLR4:NOD2	http://www.gsea-msigdb.org/gsea/msigdb/human/geneset/REACTOME_TOLL_LIKE_RECEPTOR_TLR1_TLR2_CASCADE
Canonical_Pathways	REACTOME_SIGNALING_BY_PTK6	54	3	0.00236694	0.0432772	CDKN1B:HIF1A:AKT1	http://www.gsea-msigdb.org/gsea/msigdb/human/geneset/REACTOME_SIGNALING_BY_PTK6
Canonical_Pathways	REACTOME_REGULATION_OF_PYRUVATE_DEHYDROGENASE_PDH_COMPLEX	16	2	0.00272778	0.0495813	PDHA1:PDK3	http://www.gsea-msigdb.org/gsea/msigdb/human/geneset/REACTOME_REGULATION_OF_PYRUVATE_DEHYDROGENASE_PDH_COMPLEX
Reactome	REACTOME_BIOLOGICAL_OXIDATIONS	206	44	2.62782e-61	4.34642e-58	AKR7A2:ARNT:FMO3:FMO2:FMO1:CYP1B1:SULT1C2:SULT1C4:UGT1A8:UGT1A10:UGT1A9:UGT1A7:UGT1A6:UGT1A5:UGT1A4:UGT1A3:UGT1A1:UGT2B17:UGT2B15:UGT2A3:UGT2B7:UGT2B11:UGT2B28:UGT2B4:UGT2A1:UGT2A2:UGT2A1:SULT1B1:SULT1E1:AHR:CYP3A5:CYP3A4:CYP3A43:CYP2C18:CYP2C19:CYP2C9:CYP2C8:CYP2E1:CYP1A1:CYP1A2:SULT1A2:SULT1A1:SULT2A1:SULT2B1:COMT:SULT4A1	http://www.gsea-msigdb.org/gsea/msigdb/human/geneset/REACTOME_BIOLOGICAL_OXIDATIONS
Reactome	REACTOME_DRUG_ADME	100	36	3.02626e-59	2.50271e-56	SLC16A1:SULT1C4:UGT1A8:UGT1A10:UGT1A9:UGT1A7:UGT1A6:UGT1A5:UGT1A4:UGT1A3:UGT1A1:ABCC5:UGT2B17:UGT2B15:UGT2A3:UGT2B7:UGT2B11:UGT2B28:UGT2B4:UGT2A1:UGT2A2:UGT2A1:SULT1E1:ABCG2:SLC22A7:ABCB1:CYP3A4:CYP2C19:CYP2C9:CYP2C8:ABCC2:CYP2E1:SLC22A8:ABCC4:ABCC1:SULT1A1:ABCC3:SULT2A1	http://www.gsea-msigdb.org/gsea/msigdb/human/geneset/REACTOME_DRUG_ADME
Reactome	REACTOME_ASPIRIN_ADME	39	25	1.69649e-49	9.3533e-47	SLC16A1:UGT1A8:UGT1A9:UGT1A7:UGT1A6:UGT1A5:UGT1A4:UGT1A3:UGT1A1:UGT2B17:UGT2B15:UGT2A3:UGT2B7:UGT2B11:UGT2B28:UGT2B4:UGT2A1:UGT2A2:UGT2A1:SLC22A7:CYP3A4:CYP2C19:CYP2C9:CYP2C8:ABCC2:CYP2E1:ABCC3	http://www.gsea-msigdb.org/gsea/msigdb/human/geneset/REACTOME_ASPIRIN_ADME
Reactome	REACTOME_PHASE_II_CONJUGATION_OF_COMPOUNDS	101	28	3.53408e-42	1.46134e-39	SULT1C2:SULT1C4:UGT1A8:UGT1A10:UGT1A9:UGT1A7:UGT1A6:UGT1A5:UGT1A4:UGT1A3:UGT1A1:UGT2B17:UGT2B15:UGT2A3:UGT2B7:UGT2B11:UGT2B28:UGT2B4:UGT2A1:UGT2A2:UGT2A1:SULT1B1:SULT1E1:CYP1A2:SULT1A2:SULT1A1:SULT2A1:SULT2B1:COMT:SULT4A1	http://www.gsea-msigdb.org/gsea/msigdb/human/geneset/REACTOME_PHASE_II_CONJUGATION_OF_COMPOUNDS
Reactome	REACTOME_GLUCURONIDATION	23	17	1.59675e-35	5.28204e-33	UGT1A8:UGT1A10:UGT1A9:UGT1A7:UGT1A6:UGT1A5:UGT1A4:UGT1A3:UGT1A1:UGT2B17:UGT2B15:UGT2A3:UGT2B7:UGT2B11:UGT2B28:UGT2B4:UGT2A1:UGT2A2:UGT2A1	http://www.gsea-msigdb.org/gsea/msigdb/human/geneset/REACTOME_GLUCURONIDATION
Reactome	REACTOME_PARACETAMOL_ADME	26	16	1.9494e-31	5.37386e-29	SULT1C4:UGT1A10:UGT1A9:UGT1A6:UGT1A1:ABCC5:UGT2B15:SULT1E1:ABCG2:ABCC2:CYP2E1:ABCC4:ABCC1:SULT1A1:ABCC3:SULT2A1	http://www.gsea-msigdb.org/gsea/msigdb/human/geneset/REACTOME_PARACETAMOL_ADME
Reactome	REACTOME_DEFECTIVE_GALNT3_CAUSES_HFTC	15	13	4.92493e-29	1.16369e-26	MUC1:MUC13:MUC20:MUC4:MUC7:MUC21:MUC12:MUC17:RN7SKP54:MUC6:MUC5AC:MUC5B:MUC15:MUC16	http://www.gsea-msigdb.org/gsea/msigdb/human/geneset/REACTOME_DEFECTIVE_GALNT3_CAUSES_HFTC
Reactome	REACTOME_DEFECTIVE_C1GALT1C1_CAUSES_TNPS	16	13	2.61598e-28	5.40854e-26	MUC1:MUC13:MUC20:MUC4:MUC7:MUC21:MUC12:MUC17:RN7SKP54:MUC6:MUC5AC:MUC5B:MUC15:MUC16	http://www.gsea-msigdb.org/gsea/msigdb/human/geneset/REACTOME_DEFECTIVE_C1GALT1C1_CAUSES_TNPS
Reactome	REACTOME_TERMINATION_OF_O_GLYCAN_BIOSYNTHESIS	22	13	2.26771e-25	4.16756e-23	MUC1:MUC13:MUC20:MUC4:MUC7:MUC21:MUC12:MUC17:RN7SKP54:MUC6:MUC5AC:MUC5B:MUC15:MUC16	http://www.gsea-msigdb.org/gsea/msigdb/human/geneset/REACTOME_TERMINATION_OF_O_GLYCAN_BIOSYNTHESIS
Reactome	REACTOME_DECTIN_2_FAMILY	25	13	2.34208e-24	3.87381e-22	MUC1:MUC13:MUC20:MUC4:MUC7:MUC21:MUC12:MUC17:RN7SKP54:MUC6:MUC5AC:MUC5B:MUC15:MUC16	http://www.gsea-msigdb.org/gsea/msigdb/human/geneset/REACTOME_DECTIN_2_FAMILY
Reactome	REACTOME_XENOBIOTICS	21	12	3.0417e-23	4.57361e-21	ARNT:AHR:CYP3A5:CYP3A4:CYP3A43:CYP2C18:CYP2C19:CYP2C9:CYP2C8:CYP2E1:CYP1A1:CYP1A2	http://www.gsea-msigdb.org/gsea/msigdb/human/geneset/REACTOME_XENOBIOTICS
Reactome	REACTOME_PHASE_I_FUNCTIONALIZATION_OF_COMPOUNDS	99	16	3.09744e-20	4.2693e-18	ARNT:FMO3:FMO2:FMO1:CYP1B1:AHR:CYP3A5:CYP3A4:CYP3A43:CYP2C18:CYP2C19:CYP2C9:CYP2C8:CYP2E1:CYP1A1:CYP1A2	http://www.gsea-msigdb.org/gsea/msigdb/human/geneset/REACTOME_PHASE_I_FUNCTIONALIZATION_OF_COMPOUNDS
Reactome	REACTOME_O_LINKED_GLYCOSYLATION_OF_MUCINS	59	13	1.58767e-18	2.02001e-16	MUC1:MUC13:MUC20:MUC4:MUC7:MUC21:MUC12:MUC17:RN7SKP54:MUC6:MUC5AC:MUC5B:MUC15:MUC16	http://www.gsea-msigdb.org/gsea/msigdb/human/geneset/REACTOME_O_LINKED_GLYCOSYLATION_OF_MUCINS
Reactome	REACTOME_CYTOCHROME_P450_ARRANGED_BY_SUBSTRATE_TYPE	60	13	2.0186e-18	2.38483e-16	ARNT:CYP1B1:AHR:CYP3A5:CYP3A4:CYP3A43:CYP2C18:CYP2C19:CYP2C9:CYP2C8:CYP2E1:CYP1A1:CYP1A2	http://www.gsea-msigdb.org/gsea/msigdb/human/geneset/REACTOME_CYTOCHROME_P450_ARRANGED_BY_SUBSTRATE_TYPE
Reactome	REACTOME_DISEASES_ASSOCIATED_WITH_O_GLYCOSYLATION_OF_PROTEINS	64	13	5.04957e-18	5.56799e-16	MUC1:MUC13:MUC20:MUC4:MUC7:MUC21:MUC12:MUC17:RN7SKP54:MUC6:MUC5AC:MUC5B:MUC15:MUC16	http://www.gsea-msigdb.org/gsea/msigdb/human/geneset/REACTOME_DISEASES_ASSOCIATED_WITH_O_GLYCOSYLATION_OF_PROTEINS
Reactome	REACTOME_DISEASES_OF_METABOLISM	240	19	7.86176e-18	8.12709e-16	MUC1:FMO3:CYP1B1:LCT:UGT1A4:UGT1A1:MUC13:MUC20:MUC4:MUC7:MUC21:GUSB:MUC12:MUC17:RN7SKP54:MUC6:MUC5AC:MUC5B:MUC15:MUC16	http://www.gsea-msigdb.org/gsea/msigdb/human/geneset/REACTOME_DISEASES_OF_METABOLISM
Reactome	REACTOME_CYTOSOLIC_SULFONATION_OF_SMALL_MOLECULES	21	9	3.32631e-16	3.23631e-14	SULT1C2:SULT1C4:SULT1B1:SULT1E1:SULT1A2:SULT1A1:SULT2A1:SULT2B1:SULT4A1	http://www.gsea-msigdb.org/gsea/msigdb/human/geneset/REACTOME_CYTOSOLIC_SULFONATION_OF_SMALL_MOLECULES
Reactome	REACTOME_O_LINKED_GLYCOSYLATION	105	13	4.5427e-15	4.17423e-13	MUC1:MUC13:MUC20:MUC4:MUC7:MUC21:MUC12:MUC17:RN7SKP54:MUC6:MUC5AC:MUC5B:MUC15:MUC16	http://www.gsea-msigdb.org/gsea/msigdb/human/geneset/REACTOME_O_LINKED_GLYCOSYLATION
Reactome	REACTOME_C_TYPE_LECTIN_RECEPTORS_CLRS	133	13	1.03663e-13	9.02417e-12	MUC1:MUC13:MUC20:MUC4:MUC7:MUC21:MUC12:MUC17:RN7SKP54:MUC6:MUC5AC:MUC5B:MUC15:MUC16	http://www.gsea-msigdb.org/gsea/msigdb/human/geneset/REACTOME_C_TYPE_LECTIN_RECEPTORS_CLRS
Reactome	REACTOME_DISEASES_OF_GLYCOSYLATION	137	13	1.5268e-13	1.26267e-11	MUC1:MUC13:MUC20:MUC4:MUC7:MUC21:MUC12:MUC17:RN7SKP54:MUC6:MUC5AC:MUC5B:MUC15:MUC16	http://www.gsea-msigdb.org/gsea/msigdb/human/geneset/REACTOME_DISEASES_OF_GLYCOSYLATION
Reactome	REACTOME_SYNTHESIS_OF_16_20_HYDROXYEICOSATETRAENOIC_ACIDS_HETE	8	6	3.37033e-13	2.53388e-11	CYP1B1:CYP2C19:CYP2C9:CYP2C8:CYP1A1:CYP1A2	http://www.gsea-msigdb.org/gsea/msigdb/human/geneset/REACTOME_SYNTHESIS_OF_16_20_HYDROXYEICOSATETRAENOIC_ACIDS_HETE
Reactome	REACTOME_SYNTHESIS_OF_EPOXY_EET_AND_DIHYDROXYEICOSATRIENOIC_ACIDS_DHET	8	6	3.37033e-13	2.53388e-11	CYP1B1:CYP2C19:CYP2C9:CYP2C8:CYP1A1:CYP1A2	http://www.gsea-msigdb.org/gsea/msigdb/human/geneset/REACTOME_SYNTHESIS_OF_EPOXY_EET_AND_DIHYDROXYEICOSATRIENOIC_ACIDS_DHET
Reactome	REACTOME_BIOSYNTHESIS_OF_MARESIN_LIKE_SPMS	5	5	2.58613e-12	1.78227e-10	CYP3A4:CYP2C9:CYP2C8:CYP2E1:CYP1A2	http://www.gsea-msigdb.org/gsea/msigdb/human/geneset/REACTOME_BIOSYNTHESIS_OF_MARESIN_LIKE_SPMS
Reactome	REACTOME_ORGANIC_ANION_TRANSPORT	5	5	2.58613e-12	1.78227e-10	SLC22A7:SLC22A6:SLC22A8:SLC22A11:SLC22A12	http://www.gsea-msigdb.org/gsea/msigdb/human/geneset/REACTOME_ORGANIC_ANION_TRANSPORT
Reactome	REACTOME_ORGANIC_CATION_ANION_ZWITTERION_TRANSPORT	13	6	2.0247e-11	1.33954e-09	SLC22A5:SLC22A7:SLC22A6:SLC22A8:SLC22A11:SLC22A12	http://www.gsea-msigdb.org/gsea/msigdb/human/geneset/REACTOME_ORGANIC_CATION_ANION_ZWITTERION_TRANSPORT
Reactome	REACTOME_TRANSPORT_OF_SMALL_MOLECULES	704	21	3.01666e-11	1.91906e-09	ABCD3:SLC16A1:SLC2A2:ABCC5:ABCG2:SLC22A5:SLC22A7:ABCB1:ABCC2:KCNJ11:SLC22A6:SLC22A8:SLC22A11:SLC22A12:SLC16A7:ABCC4:ABCC1:ABCC3:SLC5A1:SLC16A8:SLC16A2	http://www.gsea-msigdb.org/gsea/msigdb/human/geneset/REACTOME_TRANSPORT_OF_SMALL_MOLECULES
Reactome	REACTOME_BIOSYNTHESIS_OF_MARESINS	7	5	5.38849e-11	3.30095e-09	CYP3A4:CYP2C9:CYP2C8:CYP2E1:CYP1A2	http://www.gsea-msigdb.org/gsea/msigdb/human/geneset/REACTOME_BIOSYNTHESIS_OF_MARESINS
Reactome	REACTOME_BIOSYNTHESIS_OF_SPECIALIZED_PRORESOLVING_MEDIATORS_SPMS	17	6	1.4371e-10	8.48916e-09	CYP3A4:CYP2C9:CYP2C8:CYP2E1:CYP1A1:CYP1A2	http://www.gsea-msigdb.org/gsea/msigdb/human/geneset/REACTOME_BIOSYNTHESIS_OF_SPECIALIZED_PRORESOLVING_MEDIATORS_SPMS
Reactome	REACTOME_TRANSPORT_OF_BILE_SALTS_AND_ORGANIC_ACIDS_METAL_IONS_AND_AMINE_COMPOUNDS	80	9	2.06257e-10	1.17638e-08	SLC16A1:SLC22A5:SLC22A7:SLC22A6:SLC22A8:SLC22A11:SLC22A12:SLC16A7:SLC16A8	http://www.gsea-msigdb.org/gsea/msigdb/human/geneset/REACTOME_TRANSPORT_OF_BILE_SALTS_AND_ORGANIC_ACIDS_METAL_IONS_AND_AMINE_COMPOUNDS
Reactome	REACTOME_PREDNISONE_ADME	10	5	6.39065e-10	3.52338e-08	UGT1A8:UGT1A3:UGT2B17:UGT2B7:ABCB1:CYP3A4	http://www.gsea-msigdb.org/gsea/msigdb/human/geneset/REACTOME_PREDNISONE_ADME
Reactome	REACTOME_SLC_MEDIATED_TRANSMEMBRANE_TRANSPORT	239	12	2.32853e-09	1.24239e-07	SLC16A1:SLC2A2:SLC22A5:SLC22A7:SLC22A6:SLC22A8:SLC22A11:SLC22A12:SLC16A7:SLC5A1:SLC16A8:SLC16A2	http://www.gsea-msigdb.org/gsea/msigdb/human/geneset/REACTOME_SLC_MEDIATED_TRANSMEMBRANE_TRANSPORT
Reactome	REACTOME_PYRUVATE_METABOLISM	30	6	6.5463e-09	3.38362e-07	SLC16A1:LDHA:LDHB:SLC16A8:PDHA1:PDK3	http://www.gsea-msigdb.org/gsea/msigdb/human/geneset/REACTOME_PYRUVATE_METABOLISM
Reactome	REACTOME_HEME_DEGRADATION	15	5	7.46789e-09	3.743e-07	UGT1A4:UGT1A1:ABCG2:ABCC2:ABCC1	http://www.gsea-msigdb.org/gsea/msigdb/human/geneset/REACTOME_HEME_DEGRADATION
Reactome	REACTOME_ARACHIDONIC_ACID_METABOLISM	55	7	9.43308e-09	4.58891e-07	CYP1B1:CYP2C19:CYP2C9:CYP2C8:CYP1A1:CYP1A2:ABCC1	http://www.gsea-msigdb.org/gsea/msigdb/human/geneset/REACTOME_ARACHIDONIC_ACID_METABOLISM
Reactome	REACTOME_ABC_FAMILY_PROTEINS_MEDIATED_TRANSPORT	101	8	3.60165e-08	1.70204e-06	ABCD3:ABCC5:ABCB1:ABCC2:KCNJ11:ABCC4:ABCC1:ABCC3	http://www.gsea-msigdb.org/gsea/msigdb/human/geneset/REACTOME_ABC_FAMILY_PROTEINS_MEDIATED_TRANSPORT
Reactome	REACTOME_ATORVASTATIN_ADME	9	4	6.75579e-08	3.10391e-06	UGT1A8:UGT1A3:ABCB1:CYP3A4:ABCC2	http://www.gsea-msigdb.org/gsea/msigdb/human/geneset/REACTOME_ATORVASTATIN_ADME
Reactome	REACTOME_CYP2E1_REACTIONS	10	4	1.1217e-07	5.01432e-06	CYP2C19:CYP2C9:CYP2C8:CYP2E1	http://www.gsea-msigdb.org/gsea/msigdb/human/geneset/REACTOME_CYP2E1_REACTIONS
Reactome	REACTOME_METABOLISM_OF_PORPHYRINS	27	5	1.91552e-07	8.33754e-06	UGT1A4:UGT1A1:ABCG2:ABCC2:ABCC1	http://www.gsea-msigdb.org/gsea/msigdb/human/geneset/REACTOME_METABOLISM_OF_PORPHYRINS
Reactome	REACTOME_PYRUVATE_METABOLISM_AND_CITRIC_ACID_TCA_CYCLE	54	6	2.58755e-07	1.09739e-05	SLC16A1:LDHA:LDHB:SLC16A8:PDHA1:PDK3	http://www.gsea-msigdb.org/gsea/msigdb/human/geneset/REACTOME_PYRUVATE_METABOLISM_AND_CITRIC_ACID_TCA_CYCLE
Reactome	REACTOME_METABOLISM_OF_LIPIDS	718	16	4.5387e-07	1.87675e-05	ARNT:CYP1B1:UGT1A9:UGT8:SLC22A5:AHR:CYP3A4:CYP2C19:CYP2C9:CYP2C8:CYP2E1:CYP1A1:CYP1A2:ABCC1:ABCC3:SULT2A1	http://www.gsea-msigdb.org/gsea/msigdb/human/geneset/REACTOME_METABOLISM_OF_LIPIDS
Reactome	REACTOME_INNATE_IMMUNE_SYSTEM	1012	19	4.75439e-07	1.91799e-05	MUC1:TLR5:MYD88:MUC13:MUC20:MUC4:MUC7:TLR2:MUC21:GUSB:MUC12:MUC17:RN7SKP54:TLR4:MUC6:MUC5AC:MUC5B:MUC15:NOD2:MUC16	http://www.gsea-msigdb.org/gsea/msigdb/human/geneset/REACTOME_INNATE_IMMUNE_SYSTEM
Reactome	REACTOME_PROTON_COUPLED_MONOCARBOXYLATE_TRANSPORT	5	3	1.13651e-06	4.47569e-05	SLC16A1:SLC16A7:SLC16A8	http://www.gsea-msigdb.org/gsea/msigdb/human/geneset/REACTOME_PROTON_COUPLED_MONOCARBOXYLATE_TRANSPORT
Reactome	REACTOME_AFLATOXIN_ACTIVATION_AND_DETOXIFICATION	17	4	1.23799e-06	4.76194e-05	AKR7A2:CYP3A5:CYP3A4:CYP1A2	http://www.gsea-msigdb.org/gsea/msigdb/human/geneset/REACTOME_AFLATOXIN_ACTIVATION_AND_DETOXIFICATION
Reactome	REACTOME_FATTY_ACID_METABOLISM	169	8	1.88604e-06	7.08979e-05	CYP1B1:SLC22A5:CYP2C19:CYP2C9:CYP2C8:CYP1A1:CYP1A2:ABCC1	http://www.gsea-msigdb.org/gsea/msigdb/human/geneset/REACTOME_FATTY_ACID_METABOLISM
Reactome	REACTOME_DISEASES_OF_IMMUNE_SYSTEM	31	4	1.55224e-05	0.000570536	TLR5:MYD88:TLR2:TLR4	http://www.gsea-msigdb.org/gsea/msigdb/human/geneset/REACTOME_DISEASES_OF_IMMUNE_SYSTEM
Reactome	REACTOME_METABOLIC_DISORDERS_OF_BIOLOGICAL_OXIDATION_ENZYMES	33	4	2.00348e-05	0.000720381	FMO3:CYP1B1:UGT1A4:UGT1A1	http://www.gsea-msigdb.org/gsea/msigdb/human/geneset/REACTOME_METABOLIC_DISORDERS_OF_BIOLOGICAL_OXIDATION_ENZYMES
Reactome	REACTOME_DISORDERS_OF_TRANSMEMBRANE_TRANSPORTERS	175	7	2.53188e-05	0.000891006	SLC16A1:SLC2A2:SLC22A5:ABCC2:KCNJ11:SLC22A12:SLC5A1	http://www.gsea-msigdb.org/gsea/msigdb/human/geneset/REACTOME_DISORDERS_OF_TRANSMEMBRANE_TRANSPORTERS
Reactome	REACTOME_IRAK4_DEFICIENCY_TLR2_4	18	3	8.85213e-05	0.0030503	MYD88:TLR2:TLR4	http://www.gsea-msigdb.org/gsea/msigdb/human/geneset/REACTOME_IRAK4_DEFICIENCY_TLR2_4
Reactome	REACTOME_SLC_TRANSPORTER_DISORDERS	99	5	0.000128165	0.00432622	SLC16A1:SLC2A2:SLC22A5:SLC22A12:SLC5A1	http://www.gsea-msigdb.org/gsea/msigdb/human/geneset/REACTOME_SLC_TRANSPORTER_DISORDERS
Reactome	REACTOME_THE_CITRIC_ACID_TCA_CYCLE_AND_RESPIRATORY_ELECTRON_TRANSPORT	160	6	0.000139343	0.00459676	SLC16A1:LDHA:LDHB:SLC16A8:PDHA1:PDK3	http://www.gsea-msigdb.org/gsea/msigdb/human/geneset/REACTOME_THE_CITRIC_ACID_TCA_CYCLE_AND_RESPIRATORY_ELECTRON_TRANSPORT
Reactome	REACTOME_INTESTINAL_ABSORPTION	4	2	0.000141738	0.00459676	SLC2A2:SLC5A1	http://www.gsea-msigdb.org/gsea/msigdb/human/geneset/REACTOME_INTESTINAL_ABSORPTION
Reactome	REACTOME_BASIGIN_INTERACTIONS	22	3	0.000164691	0.00523843	SLC16A1:ITGA6:SLC16A8	http://www.gsea-msigdb.org/gsea/msigdb/human/geneset/REACTOME_BASIGIN_INTERACTIONS
Reactome	REACTOME_DIGESTION_AND_ABSORPTION	24	3	0.00021491	0.00670681	LCT:SLC2A2:SLC5A1	http://www.gsea-msigdb.org/gsea/msigdb/human/geneset/REACTOME_DIGESTION_AND_ABSORPTION
Reactome	REACTOME_REGULATION_OF_LIPID_METABOLISM_BY_PPARALPHA	112	5	0.000228555	0.00695484	ARNT:UGT1A9:AHR:CYP1A1:SULT2A1	http://www.gsea-msigdb.org/gsea/msigdb/human/geneset/REACTOME_REGULATION_OF_LIPID_METABOLISM_BY_PPARALPHA
Reactome	REACTOME_CIPROFLOXACIN_ADME	5	2	0.000235472	0.00695484	ABCG2:SLC22A8	http://www.gsea-msigdb.org/gsea/msigdb/human/geneset/REACTOME_CIPROFLOXACIN_ADME
Reactome	REACTOME_ABACAVIR_TRANSMEMBRANE_TRANSPORT	5	2	0.000235472	0.00695484	ABCG2:ABCB1	http://www.gsea-msigdb.org/gsea/msigdb/human/geneset/REACTOME_ABACAVIR_TRANSMEMBRANE_TRANSPORT
Reactome	REACTOME_ENDOGENOUS_STEROLS	26	3	0.000274106	0.00795387	ARNT:CYP1B1:AHR	http://www.gsea-msigdb.org/gsea/msigdb/human/geneset/REACTOME_ENDOGENOUS_STEROLS
Reactome	REACTOME_ARYL_HYDROCARBON_RECEPTOR_SIGNALLING	6	2	0.000352076	0.0100402	ARNT:AHR	http://www.gsea-msigdb.org/gsea/msigdb/human/geneset/REACTOME_ARYL_HYDROCARBON_RECEPTOR_SIGNALLING
Reactome	REACTOME_ABACAVIR_ADME	9	2	0.000836887	0.0234612	ABCG2:ABCB1	http://www.gsea-msigdb.org/gsea/msigdb/human/geneset/REACTOME_ABACAVIR_ADME
Reactome	REACTOME_POST_TRANSLATIONAL_PROTEIN_MODIFICATION	1361	16	0.000988102	0.0272387	MUC1:NFE2L2:MUC13:MUC20:MUC4:MUC7:MUC21:MUC12:MUC17:RN7SKP54:MUC6:MUC5AC:MUC5B:MUC15:HIF1A:NOD2:MUC16	http://www.gsea-msigdb.org/gsea/msigdb/human/geneset/REACTOME_POST_TRANSLATIONAL_PROTEIN_MODIFICATION
Reactome	REACTOME_TOLL_LIKE_RECEPTOR_CASCADES	160	5	0.00116049	0.0314663	TLR5:MYD88:TLR2:TLR4:NOD2	http://www.gsea-msigdb.org/gsea/msigdb/human/geneset/REACTOME_TOLL_LIKE_RECEPTOR_CASCADES
Reactome	REACTOME_REGULATION_OF_GENE_EXPRESSION_BY_HYPOXIA_INDUCIBLE_FACTOR	11	2	0.00127041	0.0338912	ARNT:HIF1A	http://www.gsea-msigdb.org/gsea/msigdb/human/geneset/REACTOME_REGULATION_OF_GENE_EXPRESSION_BY_HYPOXIA_INDUCIBLE_FACTOR
Reactome	REACTOME_INTERLEUKIN_4_AND_INTERLEUKIN_13_SIGNALING	105	4	0.00178516	0.0462645	MUC1:HIF1A:AKT1:CCL2	http://www.gsea-msigdb.org/gsea/msigdb/human/geneset/REACTOME_INTERLEUKIN_4_AND_INTERLEUKIN_13_SIGNALING
Reactome	REACTOME_METHYLATION	13	2	0.00179016	0.0462645	CYP1A2:COMT	http://www.gsea-msigdb.org/gsea/msigdb/human/geneset/REACTOME_METHYLATION
TF_targets	RYTAAWNNNTGAY_UNKNOWN	60	5	1.13917e-05	0.0127018	UGT1A1:SLC22A6:SLC22A8:SLC22A12:SULF2	http://www.gsea-msigdb.org/gsea/msigdb/human/geneset/RYTAAWNNNTGAY_UNKNOWN
Cancer_gene_neighborhoods	CAR_HPX	70	6	1.23251e-06	0.00052628	FMO3:UGT2B11:CYP2C9:CYP2C8:CYP2E1:SULT2A1	http://www.gsea-msigdb.org/gsea/msigdb/human/geneset/CAR_HPX
Cancer_gene_neighborhoods	GNF2_IGF1	25	4	6.38379e-06	0.00136294	CYP2C9:CYP2C8:CYP2E1:CYP1A2	http://www.gsea-msigdb.org/gsea/msigdb/human/geneset/GNF2_IGF1
Cancer_gene_neighborhoods	GNF2_HPN	124	6	3.38656e-05	0.00482021	UGT2B28:SLC22A7:CYP2C9:CYP2C8:CYP2E1:CYP1A2	http://www.gsea-msigdb.org/gsea/msigdb/human/geneset/GNF2_HPN
Cancer_gene_neighborhoods	GNF2_CYP2B6	44	4	6.376e-05	0.00680638	CYP2C9:CYP2C8:CYP2E1:CYP1A2	http://www.gsea-msigdb.org/gsea/msigdb/human/geneset/GNF2_CYP2B6
Cancer_gene_neighborhoods	GNF2_TST	95	5	0.000105453	0.00859112	SLC22A7:CYP2C9:CYP2C8:CYP2E1:CYP1A2	http://www.gsea-msigdb.org/gsea/msigdb/human/geneset/GNF2_TST
Cancer_gene_neighborhoods	CAR_IGFBP1	53	4	0.000132944	0.00859112	CYP3A4:CYP2C9:CYP2C8:SULT2A1	http://www.gsea-msigdb.org/gsea/msigdb/human/geneset/CAR_IGFBP1
Cancer_gene_neighborhoods	GNF2_GSTM1	101	5	0.000140838	0.00859112	SLC22A7:CYP2C9:CYP2C8:CYP2E1:CYP1A2	http://www.gsea-msigdb.org/gsea/msigdb/human/geneset/GNF2_GSTM1
Cancer_gene_neighborhoods	GNF2_CEBPA	59	4	0.000202011	0.0103999	CYP2C9:CYP2C8:CYP2E1:CYP1A2	http://www.gsea-msigdb.org/gsea/msigdb/human/geneset/GNF2_CEBPA
Cancer_gene_neighborhoods	MORF_CASP10	111	5	0.000219201	0.0103999	CYP2E1:SLC22A6:SLC16A5:SULT2B1:SULT4A1	http://www.gsea-msigdb.org/gsea/msigdb/human/geneset/MORF_CASP10
Cancer_gene_neighborhoods	GNF2_LCAT	116	5	0.000269042	0.0114881	SLC22A7:CYP2C9:CYP2C8:CYP2E1:CYP1A2	http://www.gsea-msigdb.org/gsea/msigdb/human/geneset/GNF2_LCAT
Cancer_gene_neighborhoods	GNF2_HPX	127	5	0.000408639	0.0158626	SLC22A7:CYP2C9:CYP2C8:CYP2E1:CYP1A2	http://www.gsea-msigdb.org/gsea/msigdb/human/geneset/GNF2_HPX
Cancer_gene_neighborhoods	GNF2_CD14	34	3	0.000613118	0.0218168	TLR2:SULT1A1:NOD2	http://www.gsea-msigdb.org/gsea/msigdb/human/geneset/GNF2_CD14
Cancer_gene_neighborhoods	MORF_ERCC4	303	7	0.00074449	0.0244536	ABCB1:CYP2C19:CYP2E1:SLC22A6:SLC16A5:SULT2B1:SULT4A1	http://www.gsea-msigdb.org/gsea/msigdb/human/geneset/MORF_ERCC4
Cancer_gene_neighborhoods	MORF_NF1	161	5	0.00119306	0.0345563	CYP2E1:SLC22A6:SLC16A5:SULT2B1:SULT4A1	http://www.gsea-msigdb.org/gsea/msigdb/human/geneset/MORF_NF1
Cancer_gene_neighborhoods	MORF_ESR1	162	5	0.00122631	0.0345563	CYP2E1:SLC22A6:SLC16A5:SULT2B1:SULT4A1	http://www.gsea-msigdb.org/gsea/msigdb/human/geneset/MORF_ESR1
Cancer_gene_neighborhoods	MORF_PPP2R5B	164	5	0.00129485	0.0345563	CYP2E1:SLC22A6:SLC16A5:SULT2B1:SULT4A1	http://www.gsea-msigdb.org/gsea/msigdb/human/geneset/MORF_PPP2R5B
Cancer_gene_neighborhoods	MORF_BRCA1	250	6	0.00147076	0.0369419	CYP2E1:SLC22A6:SLC16A5:SULT2B1:SULT4A1:PDK3	http://www.gsea-msigdb.org/gsea/msigdb/human/geneset/MORF_BRCA1
Cancer_gene_neighborhoods	MORF_TNFRSF25	254	6	0.00159396	0.0378123	ARNT:UGT2B15:CYP2E1:SLC22A6:SLC16A5:SULT4A1	http://www.gsea-msigdb.org/gsea/msigdb/human/geneset/MORF_TNFRSF25
Cancer_gene_neighborhoods	MORF_PRKACA	105	4	0.00178516	0.040119	CYP2E1:SLC22A6:SLC16A5:SULT2B1	http://www.gsea-msigdb.org/gsea/msigdb/human/geneset/MORF_PRKACA
Cancer_gene_neighborhoods	MORF_BNIP1	182	5	0.0020457	0.0436757	CYP2E1:SLC22A6:SLC16A5:SULT2B1:SULT4A1	http://www.gsea-msigdb.org/gsea/msigdb/human/geneset/MORF_BNIP1
Cancer_gene_neighborhoods	MORF_NOS2A	272	6	0.00224827	0.0457149	ABCB1:CYP2E1:SLC22A6:SLC16A5:SULT2B1:SULT4A1	http://www.gsea-msigdb.org/gsea/msigdb/human/geneset/MORF_NOS2A
Cancer_gene_neighborhoods	GNF2_MCL1	55	3	0.00249463	0.0484185	MYD88:TLR2:NOD2	http://www.gsea-msigdb.org/gsea/msigdb/human/geneset/GNF2_MCL1
KEGG	KEGG_DRUG_METABOLISM_CYTOCHROME_P450	68	30	1.44569e-52	2.68898e-50	FMO5:FMO3:FMO2:FMO1:FMO4:UGT1A8:UGT1A10:UGT1A9:UGT1A7:UGT1A6:UGT1A5:UGT1A4:UGT1A3:UGT1A1:UGT2B17:UGT2B15:UGT2A3:UGT2B7:UGT2B11:UGT2B28:UGT2B4:UGT2A1:UGT2A1:CYP3A5:CYP3A4:CYP3A43:CYP2C18:CYP2C19:CYP2C9:CYP2C8:CYP2E1:CYP1A2	http://www.gsea-msigdb.org/gsea/msigdb/human/geneset/KEGG_DRUG_METABOLISM_CYTOCHROME_P450
KEGG	KEGG_METABOLISM_OF_XENOBIOTICS_BY_CYTOCHROME_P450	66	27	3.73388e-46	3.47251e-44	CYP1B1:UGT1A8:UGT1A10:UGT1A9:UGT1A7:UGT1A6:UGT1A5:UGT1A4:UGT1A3:UGT1A1:UGT2B17:UGT2B15:UGT2A3:UGT2B7:UGT2B11:UGT2B28:UGT2B4:UGT2A1:UGT2A1:CYP3A5:CYP3A4:CYP3A43:CYP2C18:CYP2C19:CYP2C9:CYP2C8:CYP2E1:CYP1A1:CYP1A2	http://www.gsea-msigdb.org/gsea/msigdb/human/geneset/KEGG_METABOLISM_OF_XENOBIOTICS_BY_CYTOCHROME_P450
KEGG	KEGG_RETINOL_METABOLISM	58	25	1.82835e-43	1.13357e-41	UGT1A8:UGT1A10:UGT1A9:UGT1A7:UGT1A6:UGT1A5:UGT1A4:UGT1A3:UGT1A1:UGT2B17:UGT2B15:UGT2A3:UGT2B7:UGT2B11:UGT2B28:UGT2B4:UGT2A1:UGT2A1:CYP3A5:CYP3A4:CYP3A43:CYP2C18:CYP2C19:CYP2C9:CYP2C8:CYP1A1:CYP1A2	http://www.gsea-msigdb.org/gsea/msigdb/human/geneset/KEGG_RETINOL_METABOLISM
KEGG	KEGG_STEROID_HORMONE_BIOSYNTHESIS	50	24	3.3377e-43	1.55203e-41	CYP1B1:UGT1A8:UGT1A10:UGT1A9:UGT1A7:UGT1A6:UGT1A5:UGT1A4:UGT1A3:UGT1A1:UGT2B17:UGT2B15:UGT2A3:UGT2B7:UGT2B11:UGT2B28:UGT2B4:UGT2A1:UGT2A1:SULT1E1:CYP3A5:CYP3A4:CYP3A43:CYP1A1:SULT2B1:COMT	http://www.gsea-msigdb.org/gsea/msigdb/human/geneset/KEGG_STEROID_HORMONE_BIOSYNTHESIS
KEGG	KEGG_DRUG_METABOLISM_OTHER_ENZYMES	46	20	5.90593e-35	2.19701e-33	UGT1A8:UGT1A10:UGT1A9:UGT1A7:UGT1A6:UGT1A5:UGT1A4:UGT1A3:UGT1A1:UGT2B17:UGT2B15:UGT2A3:UGT2B7:UGT2B11:UGT2B28:UGT2B4:UGT2A1:UGT2A1:GUSB:CYP3A5:CYP3A4:CYP3A43	http://www.gsea-msigdb.org/gsea/msigdb/human/geneset/KEGG_DRUG_METABOLISM_OTHER_ENZYMES
KEGG	KEGG_PENTOSE_AND_GLUCURONATE_INTERCONVERSIONS	26	17	4.88372e-34	1.51395e-32	UGT1A8:UGT1A10:UGT1A9:UGT1A7:UGT1A6:UGT1A5:UGT1A4:UGT1A3:UGT1A1:UGT2B17:UGT2B15:UGT2A3:UGT2B7:UGT2B11:UGT2B28:UGT2B4:UGT2A1:UGT2A1:GUSB	http://www.gsea-msigdb.org/gsea/msigdb/human/geneset/KEGG_PENTOSE_AND_GLUCURONATE_INTERCONVERSIONS
KEGG	KEGG_ASCORBATE_AND_ALDARATE_METABOLISM	23	16	9.10587e-33	2.41956e-31	UGT1A8:UGT1A10:UGT1A9:UGT1A7:UGT1A6:UGT1A5:UGT1A4:UGT1A3:UGT1A1:UGT2B17:UGT2B15:UGT2A3:UGT2B7:UGT2B11:UGT2B28:UGT2B4:UGT2A1:UGT2A1	http://www.gsea-msigdb.org/gsea/msigdb/human/geneset/KEGG_ASCORBATE_AND_ALDARATE_METABOLISM
KEGG	KEGG_STARCH_AND_SUCROSE_METABOLISM	47	18	2.77199e-30	6.44487e-29	UGT1A8:UGT1A10:UGT1A9:UGT1A7:UGT1A6:UGT1A5:UGT1A4:UGT1A3:UGT1A1:GBA3:UGT2B17:UGT2B15:UGT2A3:UGT2B7:UGT2B11:UGT2B28:UGT2B4:UGT2A1:UGT2A1:GUSB	http://www.gsea-msigdb.org/gsea/msigdb/human/geneset/KEGG_STARCH_AND_SUCROSE_METABOLISM
KEGG	KEGG_PORPHYRIN_AND_CHLOROPHYLL_METABOLISM	39	17	7.57295e-30	1.56508e-28	UGT1A8:UGT1A10:UGT1A9:UGT1A7:UGT1A6:UGT1A5:UGT1A4:UGT1A3:UGT1A1:UGT2B17:UGT2B15:UGT2A3:UGT2B7:UGT2B11:UGT2B28:UGT2B4:UGT2A1:UGT2A1:GUSB	http://www.gsea-msigdb.org/gsea/msigdb/human/geneset/KEGG_PORPHYRIN_AND_CHLOROPHYLL_METABOLISM
KEGG	KEGG_LINOLEIC_ACID_METABOLISM	27	9	5.17557e-15	9.62656e-14	CYP3A5:CYP3A4:CYP3A43:CYP2C18:CYP2C19:CYP2C9:CYP2C8:CYP2E1:CYP1A2	http://www.gsea-msigdb.org/gsea/msigdb/human/geneset/KEGG_LINOLEIC_ACID_METABOLISM
KEGG	KEGG_ABC_TRANSPORTERS	43	8	3.27148e-11	5.53178e-10	ABCD3:ABCC5:ABCG2:ABCB1:ABCC2:ABCC4:ABCC1:ABCC3	http://www.gsea-msigdb.org/gsea/msigdb/human/geneset/KEGG_ABC_TRANSPORTERS
KEGG	KEGG_SULFUR_METABOLISM	11	4	1.75601e-07	2.72181e-06	SULT1E1:SULT1A2:SULT1A1:SULT2B1	http://www.gsea-msigdb.org/gsea/msigdb/human/geneset/KEGG_SULFUR_METABOLISM
KEGG	KEGG_ARACHIDONIC_ACID_METABOLISM	54	5	6.75265e-06	9.66149e-05	CYP2C18:CYP2C19:CYP2C9:CYP2C8:CYP2E1	http://www.gsea-msigdb.org/gsea/msigdb/human/geneset/KEGG_ARACHIDONIC_ACID_METABOLISM
KEGG	KEGG_TOLL_LIKE_RECEPTOR_SIGNALING_PATHWAY	100	5	0.000134387	0.00178543	TLR5:MYD88:TLR2:TLR4:AKT1	http://www.gsea-msigdb.org/gsea/msigdb/human/geneset/KEGG_TOLL_LIKE_RECEPTOR_SIGNALING_PATHWAY
KEGG	KEGG_PYRUVATE_METABOLISM	39	3	0.00091985	0.0114061	LDHA:LDHB:PDHA1	http://www.gsea-msigdb.org/gsea/msigdb/human/geneset/KEGG_PYRUVATE_METABOLISM
KEGG	KEGG_TRYPTOPHAN_METABOLISM	40	3	0.000990899	0.0115192	CYP1B1:CYP1A1:CYP1A2	http://www.gsea-msigdb.org/gsea/msigdb/human/geneset/KEGG_TRYPTOPHAN_METABOLISM
KEGG	KEGG_GLYCOLYSIS_GLUCONEOGENESIS	62	3	0.00350809	0.0383827	LDHA:LDHB:PDHA1	http://www.gsea-msigdb.org/gsea/msigdb/human/geneset/KEGG_GLYCOLYSIS_GLUCONEOGENESIS
KEGG	KEGG_LEISHMANIA_INFECTION	66	3	0.0041849	0.043244	MYD88:TLR2:TLR4	http://www.gsea-msigdb.org/gsea/msigdb/human/geneset/KEGG_LEISHMANIA_INFECTION
KEGG	KEGG_RENAL_CELL_CARCINOMA	70	3	0.00493582	0.0483191	ARNT:HIF1A:AKT1	http://www.gsea-msigdb.org/gsea/msigdb/human/geneset/KEGG_RENAL_CELL_CARCINOMA
GO_mf	GOMF_GLUCURONOSYLTRANSFERASE_ACTIVITY	33	17	1.77368e-31	3.14296e-28	UGT1A8:UGT1A10:UGT1A9:UGT1A7:UGT1A6:UGT1A5:UGT1A4:UGT1A3:UGT1A1:UGT2B17:UGT2B15:UGT2A3:UGT2B7:UGT2B11:UGT2B28:UGT2B4:UGT2A1:UGT2A2:UGT2A1	http://www.gsea-msigdb.org/gsea/msigdb/human/geneset/GOMF_GLUCURONOSYLTRANSFERASE_ACTIVITY
GO_mf	GOMF_ORGANIC_ANION_TRANSMEMBRANE_TRANSPORTER_ACTIVITY	225	21	4.00796e-21	3.55106e-18	SLC16A4:SLC16A1:SLC22A13:SLC2A2:ABCC5:ABCG2:SLC22A7:ABCB1:ABCC2:SLC22A6:SLC22A8:SLC22A9:SLC22A11:SLC16A7:ABCC4:ABCC1:ABCC3:SLC16A6:SLC16A5:SLC16A8:SLC16A2	http://www.gsea-msigdb.org/gsea/msigdb/human/geneset/GOMF_ORGANIC_ANION_TRANSMEMBRANE_TRANSPORTER_ACTIVITY
GO_mf	GOMF_AROMATASE_ACTIVITY	21	11	8.17574e-21	4.52319e-18	CYP1B1:CYP3A5:CYP3A4:CYP3A43:CYP2C18:CYP2C19:CYP2C9:CYP2C8:CYP2E1:CYP1A1:CYP1A2	http://www.gsea-msigdb.org/gsea/msigdb/human/geneset/GOMF_AROMATASE_ACTIVITY
GO_mf	GOMF_UDP_GLYCOSYLTRANSFERASE_ACTIVITY	141	18	1.02104e-20	4.52319e-18	UGT1A8:UGT1A10:UGT1A9:UGT1A7:UGT1A6:UGT1A5:UGT1A4:UGT1A3:UGT1A1:UGT2B17:UGT2B15:UGT2A3:UGT2B7:UGT2B11:UGT2B28:UGT2B4:UGT2A1:UGT2A2:UGT2A1:UGT8	http://www.gsea-msigdb.org/gsea/msigdb/human/geneset/GOMF_UDP_GLYCOSYLTRANSFERASE_ACTIVITY
GO_mf	GOMF_MONOOXYGENASE_ACTIVITY	95	16	1.53648e-20	5.44529e-18	FMO5:FMO3:FMO2:FMO1:FMO4:CYP1B1:CYP3A5:CYP3A4:CYP3A43:CYP2C18:CYP2C19:CYP2C9:CYP2C8:CYP2E1:CYP1A1:CYP1A2	http://www.gsea-msigdb.org/gsea/msigdb/human/geneset/GOMF_MONOOXYGENASE_ACTIVITY
GO_mf	GOMF_RETINOIC_ACID_BINDING	23	11	3.10854e-20	9.18055e-18	UGT1A8:UGT1A10:UGT1A9:UGT1A7:UGT1A6:UGT1A4:UGT1A3:UGT1A1:UGT2B17:UGT2B15:UGT2B7:UGT2B4	http://www.gsea-msigdb.org/gsea/msigdb/human/geneset/GOMF_RETINOIC_ACID_BINDING
GO_mf	GOMF_HEXOSYLTRANSFERASE_ACTIVITY	191	18	2.68317e-18	6.77315e-16	UGT1A8:UGT1A10:UGT1A9:UGT1A7:UGT1A6:UGT1A5:UGT1A4:UGT1A3:UGT1A1:UGT2B17:UGT2B15:UGT2A3:UGT2B7:UGT2B11:UGT2B28:UGT2B4:UGT2A1:UGT2A2:UGT2A1:UGT8	http://www.gsea-msigdb.org/gsea/msigdb/human/geneset/GOMF_HEXOSYLTRANSFERASE_ACTIVITY
GO_mf	GOMF_ACTIVE_TRANSMEMBRANE_TRANSPORTER_ACTIVITY	403	23	3.05786e-18	6.77315e-16	ABCD3:SLC16A4:SLC16A1:ABCC5:ABCG2:SLC22A5:SLC22A7:ABCB1:ABCC2:KCNJ11:SLC22A6:SLC22A8:SLC22A9:SLC22A11:SLC16A7:ABCC4:ABCC1:ABCC3:SLC16A6:SLC16A5:SLC5A1:SLC16A8:SLC16A2	http://www.gsea-msigdb.org/gsea/msigdb/human/geneset/GOMF_ACTIVE_TRANSMEMBRANE_TRANSPORTER_ACTIVITY
GO_mf	GOMF_OXIDOREDUCTASE_ACTIVITY_ACTING_ON_PAIRED_DONORS_WITH_INCORPORATION_OR_REDUCTION_OF_MOLECULAR_OXYGEN_REDUCED_FLAVIN_OR_FLAVOPROTEIN_AS_ONE_DONOR_AND_INCORPORATION_OF_ONE_ATOM_OF_OXYGEN	34	11	6.28865e-18	1.23816e-15	CYP1B1:CYP3A5:CYP3A4:CYP3A43:CYP2C18:CYP2C19:CYP2C9:CYP2C8:CYP2E1:CYP1A1:CYP1A2	http://www.gsea-msigdb.org/gsea/msigdb/human/geneset/GOMF_OXIDOREDUCTASE_ACTIVITY_ACTING_ON_PAIRED_DONORS_WITH_INCORPORATION_OR_REDUCTION_OF_MOLECULAR_OXYGEN_REDUCED_FLAVIN_OR_FLAVOPROTEIN_AS_ONE_DONOR_AND_INCORPORATION_OF_ONE_ATOM_OF_OXYGEN
GO_mf	GOMF_ESTROGEN_16_ALPHA_HYDROXYLASE_ACTIVITY	7	7	5.643e-17	9.9994e-15	CYP1B1:CYP3A5:CYP3A4:CYP3A43:CYP2C8:CYP1A1:CYP1A2	http://www.gsea-msigdb.org/gsea/msigdb/human/geneset/GOMF_ESTROGEN_16_ALPHA_HYDROXYLASE_ACTIVITY
GO_mf	GOMF_MONOCARBOXYLIC_ACID_TRANSMEMBRANE_TRANSPORTER_ACTIVITY	58	12	7.93675e-17	1.27854e-14	SLC16A4:SLC16A1:SLC22A13:ABCG2:SLC22A9:SLC16A7:ABCC4:ABCC3:SLC16A6:SLC16A5:SLC16A8:SLC16A2	http://www.gsea-msigdb.org/gsea/msigdb/human/geneset/GOMF_MONOCARBOXYLIC_ACID_TRANSMEMBRANE_TRANSPORTER_ACTIVITY
GO_mf	GOMF_ISOPRENOID_BINDING	42	11	9.1065e-17	1.34473e-14	UGT1A8:UGT1A10:UGT1A9:UGT1A7:UGT1A6:UGT1A4:UGT1A3:UGT1A1:UGT2B17:UGT2B15:UGT2B7:UGT2B4	http://www.gsea-msigdb.org/gsea/msigdb/human/geneset/GOMF_ISOPRENOID_BINDING
GO_mf	GOMF_OXIDOREDUCTASE_ACTIVITY_ACTING_ON_PAIRED_DONORS_WITH_INCORPORATION_OR_REDUCTION_OF_MOLECULAR_OXYGEN	164	16	1.29746e-16	1.76854e-14	FMO5:FMO3:FMO2:FMO1:FMO4:CYP1B1:CYP3A5:CYP3A4:CYP3A43:CYP2C18:CYP2C19:CYP2C9:CYP2C8:CYP2E1:CYP1A1:CYP1A2	http://www.gsea-msigdb.org/gsea/msigdb/human/geneset/GOMF_OXIDOREDUCTASE_ACTIVITY_ACTING_ON_PAIRED_DONORS_WITH_INCORPORATION_OR_REDUCTION_OF_MOLECULAR_OXYGEN
GO_mf	GOMF_STEROID_HYDROXYLASE_ACTIVITY	23	9	9.17266e-16	1.16015e-13	CYP1B1:CYP3A5:CYP3A4:CYP3A43:CYP2C19:CYP2C9:CYP2C8:CYP1A1:CYP1A2	http://www.gsea-msigdb.org/gsea/msigdb/human/geneset/GOMF_STEROID_HYDROXYLASE_ACTIVITY
GO_mf	GOMF_GLYCOSYLTRANSFERASE_ACTIVITY	266	18	9.82064e-16	1.16015e-13	UGT1A8:UGT1A10:UGT1A9:UGT1A7:UGT1A6:UGT1A5:UGT1A4:UGT1A3:UGT1A1:UGT2B17:UGT2B15:UGT2A3:UGT2B7:UGT2B11:UGT2B28:UGT2B4:UGT2A1:UGT2A2:UGT2A1:UGT8	http://www.gsea-msigdb.org/gsea/msigdb/human/geneset/GOMF_GLYCOSYLTRANSFERASE_ACTIVITY
GO_mf	GOMF_ORGANIC_ACID_TRANSMEMBRANE_TRANSPORTER_ACTIVITY	159	15	2.02747e-15	2.24542e-13	SLC16A4:SLC16A1:SLC22A13:ABCG2:ABCB1:ABCC2:SLC22A9:SLC16A7:ABCC4:ABCC1:ABCC3:SLC16A6:SLC16A5:SLC16A8:SLC16A2	http://www.gsea-msigdb.org/gsea/msigdb/human/geneset/GOMF_ORGANIC_ACID_TRANSMEMBRANE_TRANSPORTER_ACTIVITY
GO_mf	GOMF_OXIDOREDUCTASE_ACTIVITY_ACTING_ON_PAIRED_DONORS_WITH_INCORPORATION_OR_REDUCTION_OF_MOLECULAR_OXYGEN_NAD_P_H_AS_ONE_DONOR_AND_INCORPORATION_OF_ONE_ATOM_OF_OXYGEN	38	10	2.26884e-15	2.36493e-13	FMO5:FMO3:FMO2:FMO1:FMO4:CYP3A4:CYP2C19:CYP2C9:CYP2E1:CYP1A1	http://www.gsea-msigdb.org/gsea/msigdb/human/geneset/GOMF_OXIDOREDUCTASE_ACTIVITY_ACTING_ON_PAIRED_DONORS_WITH_INCORPORATION_OR_REDUCTION_OF_MOLECULAR_OXYGEN_NAD_P_H_AS_ONE_DONOR_AND_INCORPORATION_OF_ONE_ATOM_OF_OXYGEN
GO_mf	GOMF_ABC_TYPE_XENOBIOTIC_TRANSPORTER_ACTIVITY	14	7	1.88266e-13	1.85337e-11	ABCC5:ABCG2:ABCB1:ABCC2:ABCC4:ABCC1:ABCC3	http://www.gsea-msigdb.org/gsea/msigdb/human/geneset/GOMF_ABC_TYPE_XENOBIOTIC_TRANSPORTER_ACTIVITY
GO_mf	GOMF_MONOCARBOXYLIC_ACID_BINDING	85	11	3.80759e-13	3.55108e-11	UGT1A8:UGT1A10:UGT1A9:UGT1A7:UGT1A6:UGT1A4:UGT1A3:UGT1A1:UGT2B17:UGT2B15:UGT2B7:UGT2B4	http://www.gsea-msigdb.org/gsea/msigdb/human/geneset/GOMF_MONOCARBOXYLIC_ACID_BINDING
GO_mf	GOMF_XENOBIOTIC_TRANSMEMBRANE_TRANSPORTER_ACTIVITY	29	8	1.02508e-12	9.08223e-11	ABCC5:ABCG2:SLC22A5:ABCB1:ABCC2:ABCC4:ABCC1:ABCC3	http://www.gsea-msigdb.org/gsea/msigdb/human/geneset/GOMF_XENOBIOTIC_TRANSMEMBRANE_TRANSPORTER_ACTIVITY
GO_mf	GOMF_SULFOTRANSFERASE_ACTIVITY	49	9	2.0738e-12	1.74989e-10	SULT1C2:SULT1C4:SULT1B1:SULT1E1:SULT1A2:SULT1A1:SULT2A1:SULT2B1:SULT4A1	http://www.gsea-msigdb.org/gsea/msigdb/human/geneset/GOMF_SULFOTRANSFERASE_ACTIVITY
GO_mf	GOMF_N_N_DIMETHYLANILINE_MONOOXYGENASE_ACTIVITY	5	5	2.58613e-12	2.08301e-10	FMO5:FMO3:FMO2:FMO1:FMO4	http://www.gsea-msigdb.org/gsea/msigdb/human/geneset/GOMF_N_N_DIMETHYLANILINE_MONOOXYGENASE_ACTIVITY
GO_mf	GOMF_TRANSPORTER_ACTIVITY	1160	27	9.51216e-12	7.3285e-10	ABCD3:SLC16A4:SLC16A1:SLC22A13:SLC2A2:ABCC5:ABCG2:SLC22A5:SLC22A7:ABCB1:ABCC2:KCNJ11:SLC22A6:SLC22A8:SLC22A10:SLC22A9:SLC22A11:SLC22A12:SLC16A7:ABCC4:ABCC1:ABCC3:SLC16A6:SLC16A5:SLC5A1:SLC16A8:SLC16A2	http://www.gsea-msigdb.org/gsea/msigdb/human/geneset/GOMF_TRANSPORTER_ACTIVITY
GO_mf	GOMF_ARYL_SULFOTRANSFERASE_ACTIVITY	6	5	1.54561e-11	1.14118e-09	SULT1C2:SULT1C4:SULT1B1:SULT1A2:SULT1A1	http://www.gsea-msigdb.org/gsea/msigdb/human/geneset/GOMF_ARYL_SULFOTRANSFERASE_ACTIVITY
GO_mf	GOMF_ICOSANOID_TRANSMEMBRANE_TRANSPORTER_ACTIVITY	13	6	2.0247e-11	1.43511e-09	SLC22A7:SLC22A6:SLC22A8:SLC22A11:ABCC4:ABCC3	http://www.gsea-msigdb.org/gsea/msigdb/human/geneset/GOMF_ICOSANOID_TRANSMEMBRANE_TRANSPORTER_ACTIVITY
GO_mf	GOMF_SECONDARY_ACTIVE_TRANSMEMBRANE_TRANSPORTER_ACTIVITY	249	14	2.21697e-11	1.47818e-09	SLC16A4:SLC16A1:SLC22A5:SLC22A7:SLC22A6:SLC22A8:SLC22A9:SLC22A11:SLC16A7:SLC16A6:SLC16A5:SLC5A1:SLC16A8:SLC16A2	http://www.gsea-msigdb.org/gsea/msigdb/human/geneset/GOMF_SECONDARY_ACTIVE_TRANSMEMBRANE_TRANSPORTER_ACTIVITY
GO_mf	GOMF_OXIDOREDUCTASE_ACTIVITY	693	21	2.2523e-11	1.47818e-09	AKR7A2:FMO5:FMO3:FMO2:FMO1:FMO4:CYP1B1:CYP3A5:CYP3A4:CYP3A43:CYP2C18:CYP2C19:CYP2C9:CYP2C8:CYP2E1:LDHA:LDHB:ABCC4:CYP1A1:CYP1A2:PDHA1	http://www.gsea-msigdb.org/gsea/msigdb/human/geneset/GOMF_OXIDOREDUCTASE_ACTIVITY
GO_mf	GOMF_TRANSFERASE_ACTIVITY_TRANSFERRING_SULPHUR_CONTAINING_GROUPS	67	9	4.01023e-11	2.53791e-09	SULT1C2:SULT1C4:SULT1B1:SULT1E1:SULT1A2:SULT1A1:SULT2A1:SULT2B1:SULT4A1	http://www.gsea-msigdb.org/gsea/msigdb/human/geneset/GOMF_TRANSFERASE_ACTIVITY_TRANSFERRING_SULPHUR_CONTAINING_GROUPS
GO_mf	GOMF_TETRAPYRROLE_BINDING	138	11	8.2668e-11	4.92726e-09	CYP1B1:CYP3A5:CYP3A4:CYP3A43:CYP2C18:CYP2C19:CYP2C9:CYP2C8:CYP2E1:CYP1A1:CYP1A2	http://www.gsea-msigdb.org/gsea/msigdb/human/geneset/GOMF_TETRAPYRROLE_BINDING
GO_mf	GOMF_ABC_TYPE_TRANSPORTER_ACTIVITY	48	8	8.34186e-11	4.92726e-09	ABCD3:ABCC5:ABCG2:ABCB1:ABCC2:ABCC4:ABCC1:ABCC3	http://www.gsea-msigdb.org/gsea/msigdb/human/geneset/GOMF_ABC_TYPE_TRANSPORTER_ACTIVITY
GO_mf	GOMF_IRON_ION_BINDING	142	11	1.12686e-10	6.4413e-09	CYP1B1:CYP3A5:CYP3A4:CYP3A43:CYP2C18:CYP2C19:CYP2C9:CYP2C8:CYP2E1:CYP1A1:CYP1A2	http://www.gsea-msigdb.org/gsea/msigdb/human/geneset/GOMF_IRON_ION_BINDING
GO_mf	GOMF_ARACHIDONIC_ACID_MONOOXYGENASE_ACTIVITY	17	6	1.4371e-10	7.95794e-09	CYP2C18:CYP2C19:CYP2C9:CYP2C8:CYP2E1:CYP1A1	http://www.gsea-msigdb.org/gsea/msigdb/human/geneset/GOMF_ARACHIDONIC_ACID_MONOOXYGENASE_ACTIVITY
GO_mf	GOMF_ATPASE_COUPLED_INORGANIC_ANION_TRANSMEMBRANE_TRANSPORTER_ACTIVITY	9	5	3.20786e-10	1.72253e-08	ABCC5:ABCC2:ABCC4:ABCC1:ABCC3	http://www.gsea-msigdb.org/gsea/msigdb/human/geneset/GOMF_ATPASE_COUPLED_INORGANIC_ANION_TRANSMEMBRANE_TRANSPORTER_ACTIVITY
GO_mf	GOMF_ATPASE_COUPLED_TRANSMEMBRANE_TRANSPORTER_ACTIVITY	96	9	1.08027e-09	5.63012e-08	ABCD3:ABCC5:ABCG2:ABCB1:ABCC2:KCNJ11:ABCC4:ABCC1:ABCC3	http://www.gsea-msigdb.org/gsea/msigdb/human/geneset/GOMF_ATPASE_COUPLED_TRANSMEMBRANE_TRANSPORTER_ACTIVITY
GO_mf	GOMF_EFFLUX_TRANSMEMBRANE_TRANSPORTER_ACTIVITY	14	5	4.99812e-09	2.53048e-07	ABCC5:ABCG2:ABCB1:ABCC4:ABCC1	http://www.gsea-msigdb.org/gsea/msigdb/human/geneset/GOMF_EFFLUX_TRANSMEMBRANE_TRANSPORTER_ACTIVITY
GO_mf	GOMF_ORGANIC_ACID_BINDING	210	11	7.19759e-09	3.54281e-07	UGT1A8:UGT1A10:UGT1A9:UGT1A7:UGT1A6:UGT1A4:UGT1A3:UGT1A1:UGT2B17:UGT2B15:UGT2B7:UGT2B4	http://www.gsea-msigdb.org/gsea/msigdb/human/geneset/GOMF_ORGANIC_ACID_BINDING
GO_mf	GOMF_URATE_TRANSMEMBRANE_TRANSPORTER_ACTIVITY	6	4	8.13462e-09	3.89582e-07	SLC22A13:ABCG2:SLC22A12:ABCC4	http://www.gsea-msigdb.org/gsea/msigdb/human/geneset/GOMF_URATE_TRANSMEMBRANE_TRANSPORTER_ACTIVITY
GO_mf	GOMF_LIPID_TRANSPORTER_ACTIVITY	167	10	1.00056e-08	4.66577e-07	ABCD3:SLC22A7:ABCB1:SLC22A6:SLC22A8:SLC22A9:SLC22A11:ABCC4:ABCC1:ABCC3	http://www.gsea-msigdb.org/gsea/msigdb/human/geneset/GOMF_LIPID_TRANSPORTER_ACTIVITY
GO_mf	GOMF_OXYGEN_BINDING	35	6	1.75417e-08	7.97024e-07	CYP3A5:CYP3A4:CYP2C18:CYP2C19:CYP2E1:CYP1A1	http://www.gsea-msigdb.org/gsea/msigdb/human/geneset/GOMF_OXYGEN_BINDING
GO_mf	GOMF_ABC_TYPE_GLUTATHIONE_S_CONJUGATE_TRANSPORTER_ACTIVITY	7	4	1.89089e-08	8.37665e-07	ABCC2:ABCC4:ABCC1:ABCC3	http://www.gsea-msigdb.org/gsea/msigdb/human/geneset/GOMF_ABC_TYPE_GLUTATHIONE_S_CONJUGATE_TRANSPORTER_ACTIVITY
GO_mf	GOMF_PRIMARY_ACTIVE_TRANSMEMBRANE_TRANSPORTER_ACTIVITY	151	9	5.87168e-08	2.53771e-06	ABCD3:ABCC5:ABCG2:ABCB1:ABCC2:KCNJ11:ABCC4:ABCC1:ABCC3	http://www.gsea-msigdb.org/gsea/msigdb/human/geneset/GOMF_PRIMARY_ACTIVE_TRANSMEMBRANE_TRANSPORTER_ACTIVITY
GO_mf	GOMF_RETINOIC_ACID_4_HYDROXYLASE_ACTIVITY	9	4	6.75579e-08	2.8503e-06	CYP3A5:CYP3A4:CYP2C18:CYP2C8	http://www.gsea-msigdb.org/gsea/msigdb/human/geneset/GOMF_RETINOIC_ACID_4_HYDROXYLASE_ACTIVITY
GO_mf	GOMF_ORGANIC_HYDROXY_COMPOUND_TRANSMEMBRANE_TRANSPORTER_ACTIVITY	48	6	1.2592e-07	5.1891e-06	SLC16A1:SLC16A7:ABCC4:ABCC3:SLC5A1:SLC16A8	http://www.gsea-msigdb.org/gsea/msigdb/human/geneset/GOMF_ORGANIC_HYDROXY_COMPOUND_TRANSMEMBRANE_TRANSPORTER_ACTIVITY
GO_mf	GOMF_OXIDOREDUCTASE_ACTIVITY_ACTING_ON_CH_OR_CH2_GROUPS	11	4	1.75601e-07	7.07193e-06	CYP3A4:CYP2C9:CYP2C8:CYP1A2	http://www.gsea-msigdb.org/gsea/msigdb/human/geneset/GOMF_OXIDOREDUCTASE_ACTIVITY_ACTING_ON_CH_OR_CH2_GROUPS
GO_mf	GOMF_INORGANIC_ANION_TRANSMEMBRANE_TRANSPORTER_ACTIVITY	139	8	4.29938e-07	1.693e-05	ABCC5:ABCC2:SLC22A6:SLC22A8:SLC22A11:ABCC4:ABCC1:ABCC3	http://www.gsea-msigdb.org/gsea/msigdb/human/geneset/GOMF_INORGANIC_ANION_TRANSMEMBRANE_TRANSPORTER_ACTIVITY
GO_mf	GOMF_ESTROGEN_2_HYDROXYLASE_ACTIVITY	4	3	4.56238e-07	1.75751e-05	CYP3A4:CYP1A1:CYP1A2	http://www.gsea-msigdb.org/gsea/msigdb/human/geneset/GOMF_ESTROGEN_2_HYDROXYLASE_ACTIVITY
GO_mf	GOMF_LIPID_BINDING	813	17	4.66682e-07	1.75949e-05	UGT1A8:UGT1A10:UGT1A9:UGT1A7:UGT1A6:UGT1A4:UGT1A3:UGT1A1:UGT2B17:UGT2B15:UGT2B7:UGT2B4:SULT1E1:TLR2:CYP3A4:TLR4:AKT1:SULT2B1	http://www.gsea-msigdb.org/gsea/msigdb/human/geneset/GOMF_LIPID_BINDING
GO_mf	GOMF_SYMPORTER_ACTIVITY	141	8	4.79513e-07	1.7702e-05	SLC16A4:SLC16A1:SLC22A5:SLC16A7:SLC16A6:SLC16A5:SLC5A1:SLC16A8	http://www.gsea-msigdb.org/gsea/msigdb/human/geneset/GOMF_SYMPORTER_ACTIVITY
GO_mf	GOMF_SODIUM_INDEPENDENT_ORGANIC_ANION_TRANSMEMBRANE_TRANSPORTER_ACTIVITY	16	4	9.5029e-07	3.43656e-05	SLC22A7:SLC22A6:SLC22A9:SLC22A11	http://www.gsea-msigdb.org/gsea/msigdb/human/geneset/GOMF_SODIUM_INDEPENDENT_ORGANIC_ANION_TRANSMEMBRANE_TRANSPORTER_ACTIVITY
GO_mf	GOMF_LACTATE_TRANSMEMBRANE_TRANSPORTER_ACTIVITY	5	3	1.13651e-06	3.94882e-05	SLC16A1:SLC16A7:SLC16A8	http://www.gsea-msigdb.org/gsea/msigdb/human/geneset/GOMF_LACTATE_TRANSMEMBRANE_TRANSPORTER_ACTIVITY
GO_mf	GOMF_GLUTATHIONE_TRANSMEMBRANE_TRANSPORTER_ACTIVITY	5	3	1.13651e-06	3.94882e-05	ABCC5:ABCC4:ABCC1	http://www.gsea-msigdb.org/gsea/msigdb/human/geneset/GOMF_GLUTATHIONE_TRANSMEMBRANE_TRANSPORTER_ACTIVITY
GO_mf	GOMF_HSP90_PROTEIN_BINDING	43	5	2.14555e-06	7.31137e-05	AHR:CYP2E1:HIF1A:CYP1A1:NOD2	http://www.gsea-msigdb.org/gsea/msigdb/human/geneset/GOMF_HSP90_PROTEIN_BINDING
GO_mf	GOMF_HYDROPEROXY_ICOSATETRAENOATE_DEHYDRATASE_ACTIVITY	7	3	3.94937e-06	0.000132043	CYP1B1:CYP1A1:CYP1A2	http://www.gsea-msigdb.org/gsea/msigdb/human/geneset/GOMF_HYDROPEROXY_ICOSATETRAENOATE_DEHYDRATASE_ACTIVITY
GO_mf	GOMF_NADP_BINDING	52	5	5.59283e-06	0.000183528	FMO5:FMO3:FMO2:FMO1:FMO4	http://www.gsea-msigdb.org/gsea/msigdb/human/geneset/GOMF_NADP_BINDING
GO_mf	GOMF_PROTEIN_HOMODIMERIZATION_ACTIVITY	683	14	6.54741e-06	0.000210946	ABCD3:ARNT:LCT:UGT1A8:UGT1A10:UGT1A9:UGT1A7:UGT1A6:UGT1A4:UGT1A3:UGT1A1:MUC13:ABCG2:AHR:AKT1	http://www.gsea-msigdb.org/gsea/msigdb/human/geneset/GOMF_PROTEIN_HOMODIMERIZATION_ACTIVITY
GO_mf	GOMF_SULFUR_COMPOUND_TRANSMEMBRANE_TRANSPORTER_ACTIVITY	54	5	6.75265e-06	0.000213673	ABCG2:ABCC2:ABCC4:ABCC1:ABCC3	http://www.gsea-msigdb.org/gsea/msigdb/human/geneset/GOMF_SULFUR_COMPOUND_TRANSMEMBRANE_TRANSPORTER_ACTIVITY
GO_mf	GOMF_ATPASE_COUPLED_LIPID_TRANSMEMBRANE_TRANSPORTER_ACTIVITY	9	3	9.41081e-06	0.000292561	ABCC4:ABCC1:ABCC3	http://www.gsea-msigdb.org/gsea/msigdb/human/geneset/GOMF_ATPASE_COUPLED_LIPID_TRANSMEMBRANE_TRANSPORTER_ACTIVITY
GO_mf	GOMF_ADENYL_NUCLEOTIDE_BINDING	1564	21	2.19688e-05	0.000671186	ABCD3:FMO5:FMO3:FMO2:FMO1:FMO4:ABCC5:ABCG2:SLC22A5:ABCB1:ABCC2:KCNJ11:LDHB:ABCC4:AKT1:ABCC1:SULT1A1:NOD2:ABCC3:SULT2A1:PDK3	http://www.gsea-msigdb.org/gsea/msigdb/human/geneset/GOMF_ADENYL_NUCLEOTIDE_BINDING
GO_mf	GOMF_PROTEIN_DIMERIZATION_ACTIVITY	996	16	2.88311e-05	0.00086591	ABCD3:ARNT:LCT:UGT1A8:UGT1A10:UGT1A9:UGT1A7:UGT1A6:UGT1A4:UGT1A3:UGT1A1:MUC13:ABCG2:AHR:TLR4:HIF1A:AKT1	http://www.gsea-msigdb.org/gsea/msigdb/human/geneset/GOMF_PROTEIN_DIMERIZATION_ACTIVITY
GO_mf	GOMF_HEAT_SHOCK_PROTEIN_BINDING	123	6	3.23552e-05	0.000955556	AHR:CYP2E1:CDKN1B:HIF1A:CYP1A1:NOD2	http://www.gsea-msigdb.org/gsea/msigdb/human/geneset/GOMF_HEAT_SHOCK_PROTEIN_BINDING
GO_mf	GOMF_HYDROLASE_ACTIVITY_ACTING_ON_GLYCOSYL_BONDS	129	6	4.22907e-05	0.00122851	OVGP1:LCT:GBA3:TLR2:GUSB:TLR4	http://www.gsea-msigdb.org/gsea/msigdb/human/geneset/GOMF_HYDROLASE_ACTIVITY_ACTING_ON_GLYCOSYL_BONDS
GO_mf	GOMF_FLAVIN_ADENINE_DINUCLEOTIDE_BINDING	84	5	5.86447e-05	0.0016761	FMO5:FMO3:FMO2:FMO1:FMO4	http://www.gsea-msigdb.org/gsea/msigdb/human/geneset/GOMF_FLAVIN_ADENINE_DINUCLEOTIDE_BINDING
GO_mf	GOMF_HSP70_PROTEIN_BINDING	47	4	8.28321e-05	0.00232982	CYP2E1:CDKN1B:CYP1A1:NOD2	http://www.gsea-msigdb.org/gsea/msigdb/human/geneset/GOMF_HSP70_PROTEIN_BINDING
GO_mf	GOMF_SOLUTE_INORGANIC_ANION_ANTIPORTER_ACTIVITY	20	3	0.000122788	0.0033997	SLC22A6:SLC22A8:SLC22A11	http://www.gsea-msigdb.org/gsea/msigdb/human/geneset/GOMF_SOLUTE_INORGANIC_ANION_ANTIPORTER_ACTIVITY
GO_mf	GOMF_LACTATE_DEHYDROGENASE_ACTIVITY	5	2	0.000235472	0.00632208	LDHA:LDHB	http://www.gsea-msigdb.org/gsea/msigdb/human/geneset/GOMF_LACTATE_DEHYDROGENASE_ACTIVITY
GO_mf	GOMF_GALACTOSYLCERAMIDASE_ACTIVITY	5	2	0.000235472	0.00632208	LCT:GBA3	http://www.gsea-msigdb.org/gsea/msigdb/human/geneset/GOMF_GALACTOSYLCERAMIDASE_ACTIVITY
GO_mf	GOMF_PATTERN_RECOGNITION_RECEPTOR_ACTIVITY	27	3	0.00030727	0.0080362	TLR2:TLR4:NOD2	http://www.gsea-msigdb.org/gsea/msigdb/human/geneset/GOMF_PATTERN_RECOGNITION_RECEPTOR_ACTIVITY
GO_mf	GOMF_INORGANIC_MOLECULAR_ENTITY_TRANSMEMBRANE_TRANSPORTER_ACTIVITY	639	11	0.000308387	0.0080362	SLC16A1:ABCC5:ABCC2:KCNJ11:SLC22A6:SLC22A8:SLC22A11:ABCC4:ABCC1:ABCC3:SLC5A1	http://www.gsea-msigdb.org/gsea/msigdb/human/geneset/GOMF_INORGANIC_MOLECULAR_ENTITY_TRANSMEMBRANE_TRANSPORTER_ACTIVITY
GO_mf	GOMF_PURINE_NUCLEOTIDE_BINDING	1891	21	0.000322339	0.00827804	ABCD3:FMO5:FMO3:FMO2:FMO1:FMO4:ABCC5:ABCG2:SLC22A5:ABCB1:ABCC2:KCNJ11:LDHB:ABCC4:AKT1:ABCC1:SULT1A1:NOD2:ABCC3:SULT2A1:PDK3	http://www.gsea-msigdb.org/gsea/msigdb/human/geneset/GOMF_PURINE_NUCLEOTIDE_BINDING
GO_mf	GOMF_ATP_DEPENDENT_ACTIVITY	543	10	0.000344418	0.00866498	ABCD3:MYD88:ABCC5:ABCG2:ABCB1:ABCC2:KCNJ11:ABCC4:ABCC1:ABCC3	http://www.gsea-msigdb.org/gsea/msigdb/human/geneset/GOMF_ATP_DEPENDENT_ACTIVITY
GO_mf	GOMF_LIPOPOLYSACCHARIDE_IMMUNE_RECEPTOR_ACTIVITY	6	2	0.000352076	0.00866498	TLR2:TLR4	http://www.gsea-msigdb.org/gsea/msigdb/human/geneset/GOMF_LIPOPOLYSACCHARIDE_IMMUNE_RECEPTOR_ACTIVITY
GO_mf	GOMF_BETA_GLUCOSIDASE_ACTIVITY	6	2	0.000352076	0.00866498	LCT:GBA3	http://www.gsea-msigdb.org/gsea/msigdb/human/geneset/GOMF_BETA_GLUCOSIDASE_ACTIVITY
GO_mf	GOMF_VITAMIN_TRANSMEMBRANE_TRANSPORTER_ACTIVITY	35	3	0.000668213	0.0162202	SLC2A2:ABCG2:ABCC1	http://www.gsea-msigdb.org/gsea/msigdb/human/geneset/GOMF_VITAMIN_TRANSMEMBRANE_TRANSPORTER_ACTIVITY
GO_mf	GOMF_3_PHOSPHOADENOSINE_5_PHOSPHOSULFATE_BINDING	9	2	0.000836887	0.0200401	SULT1A1:SULT2A1	http://www.gsea-msigdb.org/gsea/msigdb/human/geneset/GOMF_3_PHOSPHOADENOSINE_5_PHOSPHOSULFATE_BINDING
GO_mf	GOMF_HYDROLASE_ACTIVITY_HYDROLYZING_O_GLYCOSYL_COMPOUNDS	91	4	0.00105185	0.0248517	OVGP1:LCT:GBA3:GUSB	http://www.gsea-msigdb.org/gsea/msigdb/human/geneset/GOMF_HYDROLASE_ACTIVITY_HYDROLYZING_O_GLYCOSYL_COMPOUNDS
GO_mf	GOMF_STEROID_BINDING	97	4	0.00133328	0.0310865	UGT1A1:SULT1E1:CYP3A4:SULT2B1	http://www.gsea-msigdb.org/gsea/msigdb/human/geneset/GOMF_STEROID_BINDING
GO_mf	GOMF_SALT_TRANSMEMBRANE_TRANSPORTER_ACTIVITY	547	9	0.00150284	0.0345224	SLC16A1:SLC22A13:ABCG2:KCNJ11:SLC22A12:SLC16A7:ABCC4:SLC5A1:SLC16A8	http://www.gsea-msigdb.org/gsea/msigdb/human/geneset/GOMF_SALT_TRANSMEMBRANE_TRANSPORTER_ACTIVITY
GO_mf	GOMF_D_GLUCOSE_TRANSMEMBRANE_TRANSPORTER_ACTIVITY	12	2	0.00151961	0.0345224	SLC2A2:SLC5A1	http://www.gsea-msigdb.org/gsea/msigdb/human/geneset/GOMF_D_GLUCOSE_TRANSMEMBRANE_TRANSPORTER_ACTIVITY
GO_mf	GOMF_CARBOHYDRATE_DERIVATIVE_TRANSMEMBRANE_TRANSPORTER_ACTIVITY	48	3	0.00168602	0.0378181	ABCC5:ABCC3:SLC5A1	http://www.gsea-msigdb.org/gsea/msigdb/human/geneset/GOMF_CARBOHYDRATE_DERIVATIVE_TRANSMEMBRANE_TRANSPORTER_ACTIVITY
GO_mf	GOMF_ATP_HYDROLYSIS_ACTIVITY	352	7	0.00176533	0.0391021	ABCD3:ABCC5:ABCB1:ABCC2:ABCC4:ABCC1:ABCC3	http://www.gsea-msigdb.org/gsea/msigdb/human/geneset/GOMF_ATP_HYDROLYSIS_ACTIVITY
GO_mf	GOMF_TOLL_LIKE_RECEPTOR_BINDING	14	2	0.00208184	0.0444461	MYD88:TLR2	http://www.gsea-msigdb.org/gsea/msigdb/human/geneset/GOMF_TOLL_LIKE_RECEPTOR_BINDING
GO_mf	GOMF_GLUCOSIDASE_ACTIVITY	14	2	0.00208184	0.0444461	LCT:GBA3	http://www.gsea-msigdb.org/gsea/msigdb/human/geneset/GOMF_GLUCOSIDASE_ACTIVITY
GO_mf	GOMF_ARYLSULFATASE_ACTIVITY	14	2	0.00208184	0.0444461	SULF1:SULF2	http://www.gsea-msigdb.org/gsea/msigdb/human/geneset/GOMF_ARYLSULFATASE_ACTIVITY
GO_bp	GOBP_XENOBIOTIC_METABOLIC_PROCESS	117	38	1.43608e-60	1.1131e-56	FMO5:FMO2:FMO1:FMO4:CYP1B1:SULT1C4:UGT1A8:UGT1A10:UGT1A9:UGT1A7:UGT1A6:UGT1A3:UGT1A1:ABCC5:UGT2B17:UGT2B15:UGT2B7:UGT2B11:UGT2B28:SULT1B1:SLC22A7:AHR:ABCB1:CYP3A5:CYP3A4:CYP2C18:CYP2C19:CYP2C9:CYP2C8:ABCC2:CYP2E1:ABCC4:CYP1A1:CYP1A2:ABCC1:SULT1A2:SULT1A1:ABCC3:SULT2A1	http://www.gsea-msigdb.org/gsea/msigdb/human/geneset/GOBP_XENOBIOTIC_METABOLIC_PROCESS
GO_bp	GOBP_CELLULAR_RESPONSE_TO_XENOBIOTIC_STIMULUS	182	39	3.87857e-54	1.50314e-50	FMO5:FMO2:FMO1:FMO4:CYP1B1:SULT1C4:NFE2L2:UGT1A8:UGT1A10:UGT1A9:UGT1A7:UGT1A6:UGT1A3:UGT1A1:ABCC5:UGT2B17:UGT2B15:UGT2B7:UGT2B11:UGT2B28:SULT1B1:SLC22A7:AHR:ABCB1:CYP3A5:CYP3A4:CYP2C18:CYP2C19:CYP2C9:CYP2C8:ABCC2:CYP2E1:ABCC4:CYP1A1:CYP1A2:ABCC1:SULT1A2:SULT1A1:ABCC3:SULT2A1	http://www.gsea-msigdb.org/gsea/msigdb/human/geneset/GOBP_CELLULAR_RESPONSE_TO_XENOBIOTIC_STIMULUS
GO_bp	GOBP_RESPONSE_TO_XENOBIOTIC_STIMULUS	423	43	3.84991e-45	9.94688e-42	ABCD3:FMO5:FMO2:FMO1:FMO4:CYP1B1:SULT1C4:NFE2L2:UGT1A8:UGT1A10:UGT1A9:UGT1A7:UGT1A6:UGT1A3:UGT1A1:ABCC5:UGT2B17:UGT2B15:UGT2B7:UGT2B11:UGT2B28:SULT1B1:SLC22A7:AHR:ABCB1:CYP3A5:CYP3A4:CYP2C18:CYP2C19:CYP2C9:CYP2C8:ABCC2:CYP2E1:KCNJ11:SLC22A12:CDKN1B:ABCC4:CYP1A1:CYP1A2:ABCC1:SULT1A2:SULT1A1:ABCC3:SULT2A1	http://www.gsea-msigdb.org/gsea/msigdb/human/geneset/GOBP_RESPONSE_TO_XENOBIOTIC_STIMULUS
GO_bp	GOBP_ORGANIC_ACID_METABOLIC_PROCESS	925	51	1.30314e-40	2.52516e-37	ABCD3:SLC16A1:ARNT:FMO3:FMO2:FMO1:FMO4:CYP1B1:SULT1C4:UGT1A8:UGT1A10:UGT1A9:UGT1A7:UGT1A6:UGT1A5:UGT1A4:UGT1A3:UGT1A1:SLC22A13:UGT2B17:UGT2B15:UGT2A3:UGT2B7:UGT2B11:UGT2B28:UGT2B4:UGT2A1:UGT2A2:UGT2A1:SULT1B1:SULT1E1:TLR2:CYP3A5:CYP3A4:CYP2C18:CYP2C19:CYP2C9:CYP2C8:CYP2E1:LDHA:LDHB:HIF1A:AKT1:CYP1A1:CYP1A2:ABCC1:SULT1A2:SULT1A1:SULT2A1:SULT2B1:PDHA1:PDK3:SLC16A2	http://www.gsea-msigdb.org/gsea/msigdb/human/geneset/GOBP_ORGANIC_ACID_METABOLIC_PROCESS
GO_bp	GOBP_CELLULAR_GLUCURONIDATION	19	17	2.74817e-38	4.26022e-35	UGT1A8:UGT1A10:UGT1A9:UGT1A7:UGT1A6:UGT1A5:UGT1A4:UGT1A3:UGT1A1:UGT2B17:UGT2B15:UGT2A3:UGT2B7:UGT2B11:UGT2B28:UGT2B4:UGT2A1:UGT2A2:UGT2A1	http://www.gsea-msigdb.org/gsea/msigdb/human/geneset/GOBP_CELLULAR_GLUCURONIDATION
GO_bp	GOBP_MONOCARBOXYLIC_ACID_METABOLIC_PROCESS	600	41	7.8671e-36	1.0163e-32	ABCD3:SLC16A1:ARNT:FMO2:FMO1:FMO4:CYP1B1:UGT1A8:UGT1A10:UGT1A9:UGT1A7:UGT1A6:UGT1A5:UGT1A4:UGT1A3:UGT1A1:SLC22A13:UGT2B17:UGT2B15:UGT2A3:UGT2B7:UGT2B11:UGT2B28:UGT2B4:UGT2A1:UGT2A2:UGT2A1:CYP3A5:CYP3A4:CYP2C18:CYP2C19:CYP2C9:CYP2C8:CYP2E1:LDHA:LDHB:HIF1A:AKT1:CYP1A1:CYP1A2:SULT2A1:PDHA1:PDK3	http://www.gsea-msigdb.org/gsea/msigdb/human/geneset/GOBP_MONOCARBOXYLIC_ACID_METABOLIC_PROCESS
GO_bp	GOBP_ESTROGEN_METABOLIC_PROCESS	37	19	4.65993e-35	5.15988e-32	CYP1B1:UGT1A8:UGT1A7:UGT1A3:UGT1A1:UGT2B17:UGT2B15:UGT2A3:UGT2B7:UGT2B11:UGT2B28:UGT2B4:SULT1E1:CYP3A5:CYP3A4:CYP2C9:CYP2C8:CYP1A1:CYP1A2:SULT1A1	http://www.gsea-msigdb.org/gsea/msigdb/human/geneset/GOBP_ESTROGEN_METABOLIC_PROCESS
GO_bp	GOBP_URONIC_ACID_METABOLIC_PROCESS	24	17	5.45284e-35	5.28312e-32	UGT1A8:UGT1A10:UGT1A9:UGT1A7:UGT1A6:UGT1A5:UGT1A4:UGT1A3:UGT1A1:UGT2B17:UGT2B15:UGT2A3:UGT2B7:UGT2B11:UGT2B28:UGT2B4:UGT2A1:UGT2A2:UGT2A1	http://www.gsea-msigdb.org/gsea/msigdb/human/geneset/GOBP_URONIC_ACID_METABOLIC_PROCESS
GO_bp	GOBP_SMALL_MOLECULE_METABOLIC_PROCESS	1743	57	1.35323e-33	1.16543e-30	AKR7A2:ABCD3:SLC16A1:FMO5:ARNT:FMO3:FMO2:FMO1:FMO4:CYP1B1:SULT1C4:UGT1A8:UGT1A10:UGT1A9:UGT1A7:UGT1A6:UGT1A5:UGT1A4:UGT1A3:UGT1A1:SLC22A13:UGT2B17:UGT2B15:UGT2A3:UGT2B7:UGT2B11:UGT2B28:UGT2B4:UGT2A1:UGT2A2:UGT2A1:SULT1B1:SULT1E1:ABCG2:TLR2:CYP3A5:CYP3A4:CYP2C18:CYP2C19:CYP2C9:CYP2C8:CYP2E1:KCNJ11:LDHA:SLC22A11:SLC22A12:LDHB:HIF1A:AKT1:CYP1A1:CYP1A2:ABCC1:SULT1A2:SULT1A1:SULT2A1:SULT2B1:PDHA1:PDK3…	http://www.gsea-msigdb.org/gsea/msigdb/human/geneset/GOBP_SMALL_MOLECULE_METABOLIC_PROCESS
GO_bp	GOBP_STEROID_METABOLIC_PROCESS	309	31	5.02711e-32	3.89651e-29	ABCD3:FMO5:CYP1B1:UGT1A8:UGT1A7:UGT1A4:UGT1A3:UGT1A1:UGT2B17:UGT2B15:UGT2A3:UGT2B7:UGT2B11:UGT2B28:UGT2B4:UGT2A1:UGT2A2:UGT2A1:SULT1E1:CYP3A5:CYP3A4:CYP3A43:CYP2C19:CYP2C9:CYP2C8:CYP2E1:CYP1A1:CYP1A2:SULT1A2:SULT1A1:SULT2A1:SULT2B1:SULT4A1	http://www.gsea-msigdb.org/gsea/msigdb/human/geneset/GOBP_STEROID_METABOLIC_PROCESS
GO_bp	GOBP_LIPID_METABOLIC_PROCESS	1351	47	3.44572e-28	2.26493e-25	AKR7A2:ABCD3:SLC16A1:FMO5:FMO2:FMO1:FMO4:CYP1B1:LCT:UGT1A8:UGT1A10:UGT1A9:UGT1A7:UGT1A4:UGT1A3:UGT1A1:SLC22A13:GBA3:UGT2B17:UGT2B15:UGT2A3:UGT2B7:UGT2B11:UGT2B28:UGT2B4:UGT2A1:UGT2A2:UGT2A1:SULT1E1:UGT8:CYP3A5:CYP3A4:CYP3A43:CYP2C18:CYP2C19:CYP2C9:CYP2C8:CYP2E1:AKT1:CYP1A1:CYP1A2:SULT1A2:SULT1A1:NOD2:SULT2A1:SULT2B1:COMT:SULT4A1:PDK3	http://www.gsea-msigdb.org/gsea/msigdb/human/geneset/GOBP_LIPID_METABOLIC_PROCESS
GO_bp	GOBP_HORMONE_METABOLIC_PROCESS	231	26	3.50654e-28	2.26493e-25	ARNT:CYP1B1:UGT1A8:UGT1A9:UGT1A7:UGT1A3:UGT1A1:UGT2B17:UGT2B15:UGT2A3:UGT2B7:UGT2B11:UGT2B28:UGT2B4:SULT1B1:SULT1E1:CYP3A5:CYP3A4:CYP2C18:CYP2C9:CYP2C8:HIF1A:CYP1A1:CYP1A2:SULT1A1:SULT2A1:SLC16A2	http://www.gsea-msigdb.org/gsea/msigdb/human/geneset/GOBP_HORMONE_METABOLIC_PROCESS
GO_bp	GOBP_REGULATION_OF_HORMONE_LEVELS	522	30	8.66331e-24	5.16533e-21	SLC16A1:ARNT:CYP1B1:UGT1A8:UGT1A9:UGT1A7:UGT1A3:UGT1A1:SLC2A2:UGT2B17:UGT2B15:UGT2A3:UGT2B7:UGT2B11:UGT2B28:UGT2B4:SULT1B1:SULT1E1:CYP3A5:CYP3A4:CYP2C18:CYP2C9:CYP2C8:KCNJ11:SLC22A9:HIF1A:CYP1A1:CYP1A2:SULT1A1:SULT2A1:SLC16A2	http://www.gsea-msigdb.org/gsea/msigdb/human/geneset/GOBP_REGULATION_OF_HORMONE_LEVELS
GO_bp	GOBP_FLAVONOID_METABOLIC_PROCESS	11	10	5.89536e-23	3.26393e-20	SULT1C4:LCT:UGT1A8:UGT1A10:UGT1A9:UGT1A7:UGT1A3:UGT1A1:SULT1B1:CYP1A1:SULT1A1	http://www.gsea-msigdb.org/gsea/msigdb/human/geneset/GOBP_FLAVONOID_METABOLIC_PROCESS
GO_bp	GOBP_ORGANIC_HYDROXY_COMPOUND_METABOLIC_PROCESS	530	29	2.12693e-22	1.09906e-19	AKR7A2:ABCD3:FMO5:CYP1B1:SULT1C4:LCT:UGT1A8:UGT1A4:UGT1A3:UGT2A1:UGT2A2:UGT2A1:SULT1B1:SULT1E1:CYP3A5:CYP3A4:CYP2C18:CYP2C9:CYP2C8:CYP2E1:LDHA:LDHB:HIF1A:CYP1A1:CYP1A2:SULT1A2:SULT1A1:SULT2A1:SULT2B1:COMT:SLC16A2	http://www.gsea-msigdb.org/gsea/msigdb/human/geneset/GOBP_ORGANIC_HYDROXY_COMPOUND_METABOLIC_PROCESS
GO_bp	GOBP_MONOCARBOXYLIC_ACID_TRANSPORT	171	20	3.82372e-22	1.85235e-19	ABCD3:SLC16A4:SLC16A1:UGT1A8:UGT1A3:SLC22A13:ABCG2:SLC22A7:ABCC2:SLC22A6:SLC22A8:SLC22A9:SLC22A11:SLC16A7:ABCC4:AKT1:ABCC3:SLC16A6:SLC16A5:SLC16A8:SLC16A2	http://www.gsea-msigdb.org/gsea/msigdb/human/geneset/GOBP_MONOCARBOXYLIC_ACID_TRANSPORT
GO_bp	GOBP_ORGANIC_ANION_TRANSPORT	418	26	1.69191e-21	7.71412e-19	ABCD3:SLC16A4:SLC16A1:UGT1A8:UGT1A3:SLC22A13:SLC2A2:ABCC5:ABCG2:SLC22A7:ABCB1:ABCC2:SLC22A6:SLC22A8:SLC22A10:SLC22A9:SLC22A11:SLC22A12:SLC16A7:ABCC4:AKT1:ABCC1:ABCC3:SLC16A6:SLC16A5:SLC16A8:SLC16A2	http://www.gsea-msigdb.org/gsea/msigdb/human/geneset/GOBP_ORGANIC_ANION_TRANSPORT
GO_bp	GOBP_ORGANIC_ACID_TRANSPORT	339	23	6.47214e-20	2.78698e-17	ABCD3:SLC16A4:SLC16A1:UGT1A8:UGT1A3:SLC22A13:ABCC5:ABCG2:SLC22A7:ABCB1:ABCC2:SLC22A6:SLC22A8:SLC22A9:SLC22A11:SLC16A7:ABCC4:AKT1:ABCC1:ABCC3:SLC16A6:SLC16A5:SLC16A8:SLC16A2	http://www.gsea-msigdb.org/gsea/msigdb/human/geneset/GOBP_ORGANIC_ACID_TRANSPORT
GO_bp	GOBP_TERPENOID_METABOLIC_PROCESS	94	14	2.60182e-17	1.06141e-14	CYP1B1:UGT1A8:UGT1A9:UGT1A7:UGT1A3:UGT1A1:CYP3A5:CYP3A4:CYP2C18:CYP2C19:CYP2C9:CYP2C8:CYP2E1:CYP1A1:CYP1A2	http://www.gsea-msigdb.org/gsea/msigdb/human/geneset/GOBP_TERPENOID_METABOLIC_PROCESS
GO_bp	GOBP_PRIMARY_ALCOHOL_METABOLIC_PROCESS	99	14	5.55951e-17	2.15459e-14	AKR7A2:CYP1B1:SULT1C4:SULT1B1:SULT1E1:CYP3A5:CYP3A4:CYP2C18:CYP2C8:CYP1A1:CYP1A2:SULT1A2:SULT1A1:SULT2A1	http://www.gsea-msigdb.org/gsea/msigdb/human/geneset/GOBP_PRIMARY_ALCOHOL_METABOLIC_PROCESS
GO_bp	GOBP_VASCULAR_TRANSPORT	83	13	1.8821e-16	6.94674e-14	SLC16A1:ABCC5:ABCG2:SLC22A5:ABCB1:ABCC2:SLC22A8:SLC16A7:ABCC4:ABCC1:ABCC3:SLC5A1:SLC16A2	http://www.gsea-msigdb.org/gsea/msigdb/human/geneset/GOBP_VASCULAR_TRANSPORT
GO_bp	GOBP_ISOPRENOID_METABOLIC_PROCESS	114	14	4.30416e-16	1.51643e-13	CYP1B1:UGT1A8:UGT1A9:UGT1A7:UGT1A3:UGT1A1:CYP3A5:CYP3A4:CYP2C18:CYP2C19:CYP2C9:CYP2C8:CYP2E1:CYP1A1:CYP1A2	http://www.gsea-msigdb.org/gsea/msigdb/human/geneset/GOBP_ISOPRENOID_METABOLIC_PROCESS
GO_bp	GOBP_SULFATION	22	9	5.6062e-16	1.88929e-13	SULT1C2:SULT1C4:SULT1B1:SULT1E1:SULT1A2:SULT1A1:SULT2A1:SULT2B1:SULT4A1	http://www.gsea-msigdb.org/gsea/msigdb/human/geneset/GOBP_SULFATION
GO_bp	GOBP_XENOBIOTIC_CATABOLIC_PROCESS	24	9	1.46165e-15	4.72051e-13	FMO4:UGT1A1:CYP3A5:CYP3A4:CYP2C19:CYP2C9:CYP2C8:CYP1A1:CYP1A2	http://www.gsea-msigdb.org/gsea/msigdb/human/geneset/GOBP_XENOBIOTIC_CATABOLIC_PROCESS
GO_bp	GOBP_SECONDARY_METABOLIC_PROCESS	56	11	2.99167e-15	9.27538e-13	AKR7A2:FMO2:FMO1:CYP1B1:SULT1C4:NFE2L2:UGT1A7:CYP3A5:CYP3A4:CYP1A1:CYP1A2	http://www.gsea-msigdb.org/gsea/msigdb/human/geneset/GOBP_SECONDARY_METABOLIC_PROCESS
GO_bp	GOBP_EPOXYGENASE_P450_PATHWAY	17	8	6.09639e-15	1.75012e-12	CYP1B1:CYP2C18:CYP2C19:CYP2C9:CYP2C8:CYP2E1:CYP1A1:CYP1A2	http://www.gsea-msigdb.org/gsea/msigdb/human/geneset/GOBP_EPOXYGENASE_P450_PATHWAY
GO_bp	GOBP_TOXIN_METABOLIC_PROCESS	17	8	6.09639e-15	1.75012e-12	FMO2:FMO1:CYP1B1:NFE2L2:CYP3A5:CYP3A4:CYP1A1:CYP1A2	http://www.gsea-msigdb.org/gsea/msigdb/human/geneset/GOBP_TOXIN_METABOLIC_PROCESS
GO_bp	GOBP_ALCOHOL_METABOLIC_PROCESS	352	19	9.2589e-15	2.56306e-12	AKR7A2:FMO5:CYP1B1:SULT1C4:UGT1A8:UGT1A4:UGT1A3:SULT1B1:SULT1E1:CYP3A5:CYP3A4:CYP2C18:CYP2C9:CYP2C8:CYP1A1:CYP1A2:SULT1A2:SULT1A1:SULT2A1:SULT2B1	http://www.gsea-msigdb.org/gsea/msigdb/human/geneset/GOBP_ALCOHOL_METABOLIC_PROCESS
GO_bp	GOBP_XENOBIOTIC_GLUCURONIDATION	6	6	1.21334e-14	3.24298e-12	UGT1A8:UGT1A9:UGT1A7:UGT1A3:UGT1A1:UGT2B11:UGT2B28	http://www.gsea-msigdb.org/gsea/msigdb/human/geneset/GOBP_XENOBIOTIC_GLUCURONIDATION
GO_bp	GOBP_RETINOIC_ACID_METABOLIC_PROCESS	30	9	1.56068e-14	4.03227e-12	UGT1A8:UGT1A9:UGT1A7:UGT1A3:UGT1A1:CYP3A5:CYP3A4:CYP2C18:CYP2C8:CYP1A1	http://www.gsea-msigdb.org/gsea/msigdb/human/geneset/GOBP_RETINOIC_ACID_METABOLIC_PROCESS
GO_bp	GOBP_3_PHOSPHOADENOSINE_5_PHOSPHOSULFATE_METABOLIC_PROCESS	15	7	3.51575e-13	8.7905e-11	SULT1C4:SULT1B1:SULT1E1:SULT1A2:SULT1A1:SULT2A1:SULT2B1	http://www.gsea-msigdb.org/gsea/msigdb/human/geneset/GOBP_3_PHOSPHOADENOSINE_5_PHOSPHOSULFATE_METABOLIC_PROCESS
GO_bp	GOBP_PURINE_CONTAINING_COMPOUND_METABOLIC_PROCESS	529	20	1.33318e-12	3.22922e-10	FMO5:ARNT:FMO2:FMO1:SULT1C4:SLC22A13:SULT1B1:SULT1E1:ABCG2:LDHA:SLC22A11:SLC22A12:LDHB:HIF1A:SULT1A2:SULT1A1:SULT2A1:SULT2B1:PDHA1:PDK3	http://www.gsea-msigdb.org/gsea/msigdb/human/geneset/GOBP_PURINE_CONTAINING_COMPOUND_METABOLIC_PROCESS
GO_bp	GOBP_ETHANOL_CATABOLIC_PROCESS	10	6	2.50764e-12	5.56808e-10	SULT1C4:SULT1B1:SULT1E1:SULT1A2:SULT1A1:SULT2A1	http://www.gsea-msigdb.org/gsea/msigdb/human/geneset/GOBP_ETHANOL_CATABOLIC_PROCESS
GO_bp	GOBP_OMEGA_HYDROXYLASE_P450_PATHWAY	10	6	2.50764e-12	5.56808e-10	CYP1B1:CYP2C19:CYP2C9:CYP2C8:CYP1A1:CYP1A2	http://www.gsea-msigdb.org/gsea/msigdb/human/geneset/GOBP_OMEGA_HYDROXYLASE_P450_PATHWAY
GO_bp	GOBP_MONOTERPENOID_METABOLIC_PROCESS	5	5	2.58613e-12	5.56808e-10	CYP3A4:CYP2C19:CYP2C9:CYP2E1:CYP1A2	http://www.gsea-msigdb.org/gsea/msigdb/human/geneset/GOBP_MONOTERPENOID_METABOLIC_PROCESS
GO_bp	GOBP_FLAVONE_METABOLIC_PROCESS	5	5	2.58613e-12	5.56808e-10	LCT:UGT1A10:UGT1A9:UGT1A7:UGT1A1	http://www.gsea-msigdb.org/gsea/msigdb/human/geneset/GOBP_FLAVONE_METABOLIC_PROCESS
GO_bp	GOBP_MAINTENANCE_OF_GASTROINTESTINAL_EPITHELIUM	22	7	9.05779e-12	1.89748e-09	MUC13:MUC4:SLC22A5:TLR4:MUC6:MUC2:NOD2	http://www.gsea-msigdb.org/gsea/msigdb/human/geneset/GOBP_MAINTENANCE_OF_GASTROINTESTINAL_EPITHELIUM
GO_bp	GOBP_LIPID_HYDROXYLATION	6	5	1.54561e-11	3.15264e-09	CYP3A5:CYP3A4:CYP2C8:CYP2E1:CYP1A1	http://www.gsea-msigdb.org/gsea/msigdb/human/geneset/GOBP_LIPID_HYDROXYLATION
GO_bp	GOBP_PRIMARY_ALCOHOL_CATABOLIC_PROCESS	13	6	2.0247e-11	4.02396e-09	SULT1C4:SULT1B1:SULT1E1:SULT1A2:SULT1A1:SULT2A1	http://www.gsea-msigdb.org/gsea/msigdb/human/geneset/GOBP_PRIMARY_ALCOHOL_CATABOLIC_PROCESS
GO_bp	GOBP_TRANSMEMBRANE_TRANSPORT	1512	30	2.83915e-11	5.50156e-09	ABCD3:SLC16A4:SLC16A1:NFE2L2:SLC22A13:SLC2A2:ABCC5:ABCG2:SLC22A5:SLC22A7:ABCB1:ABCC2:KCNJ11:SLC22A6:SLC22A8:SLC22A10:SLC22A9:SLC22A11:SLC22A12:SLC16A7:ABCC4:AKT1:ABCC1:CCL2:ABCC3:SLC16A6:SLC16A5:SLC5A1:SLC16A8:SLC16A2	http://www.gsea-msigdb.org/gsea/msigdb/human/geneset/GOBP_TRANSMEMBRANE_TRANSPORT
GO_bp	GOBP_CELLULAR_LIPID_METABOLIC_PROCESS	962	24	3.99838e-11	7.55889e-09	ABCD3:FMO2:FMO1:FMO4:CYP1B1:LCT:UGT1A8:UGT1A9:UGT1A7:UGT1A3:UGT1A1:SLC22A13:GBA3:UGT8:CYP3A5:CYP3A4:CYP2C18:CYP2C19:CYP2C9:CYP2C8:CYP2E1:AKT1:CYP1A1:CYP1A2:PDK3	http://www.gsea-msigdb.org/gsea/msigdb/human/geneset/GOBP_CELLULAR_LIPID_METABOLIC_PROCESS
GO_bp	GOBP_FATTY_ACID_METABOLIC_PROCESS	378	16	5.36982e-11	9.90987e-09	ABCD3:FMO2:FMO1:FMO4:CYP1B1:SLC22A13:CYP3A4:CYP2C18:CYP2C19:CYP2C9:CYP2C8:CYP2E1:AKT1:CYP1A1:CYP1A2:PDK3	http://www.gsea-msigdb.org/gsea/msigdb/human/geneset/GOBP_FATTY_ACID_METABOLIC_PROCESS
GO_bp	GOBP_ORGANIC_HYDROXY_COMPOUND_CATABOLIC_PROCESS	70	9	6.02524e-11	1.08608e-08	SULT1C4:LCT:SULT1B1:SULT1E1:CYP3A4:SULT1A2:SULT1A1:SULT2A1:COMT	http://www.gsea-msigdb.org/gsea/msigdb/human/geneset/GOBP_ORGANIC_HYDROXY_COMPOUND_CATABOLIC_PROCESS
GO_bp	GOBP_OXIDATIVE_DEMETHYLATION	16	6	9.33609e-11	1.64464e-08	CYP3A5:CYP3A4:CYP3A43:CYP2C9:CYP2C8:CYP1A2	http://www.gsea-msigdb.org/gsea/msigdb/human/geneset/GOBP_OXIDATIVE_DEMETHYLATION
GO_bp	GOBP_LONG_CHAIN_FATTY_ACID_METABOLIC_PROCESS	104	10	9.56462e-11	1.64745e-08	ABCD3:CYP1B1:CYP3A4:CYP2C18:CYP2C19:CYP2C9:CYP2C8:CYP2E1:CYP1A1:CYP1A2	http://www.gsea-msigdb.org/gsea/msigdb/human/geneset/GOBP_LONG_CHAIN_FATTY_ACID_METABOLIC_PROCESS
GO_bp	GOBP_ARACHIDONIC_ACID_METABOLIC_PROCESS	52	8	1.63675e-10	2.75793e-08	CYP1B1:CYP2C18:CYP2C19:CYP2C9:CYP2C8:CYP2E1:CYP1A1:CYP1A2	http://www.gsea-msigdb.org/gsea/msigdb/human/geneset/GOBP_ARACHIDONIC_ACID_METABOLIC_PROCESS
GO_bp	GOBP_EPITHELIAL_STRUCTURE_MAINTENANCE	32	7	1.71687e-10	2.83138e-08	MUC13:MUC4:SLC22A5:TLR4:MUC6:MUC2:NOD2	http://www.gsea-msigdb.org/gsea/msigdb/human/geneset/GOBP_EPITHELIAL_STRUCTURE_MAINTENANCE
GO_bp	GOBP_XENOBIOTIC_TRANSPORT	54	8	2.24466e-10	3.62465e-08	ABCC5:ABCG2:SLC22A5:ABCB1:ABCC2:ABCC4:ABCC1:ABCC3	http://www.gsea-msigdb.org/gsea/msigdb/human/geneset/GOBP_XENOBIOTIC_TRANSPORT
GO_bp	GOBP_ICOSANOID_METABOLIC_PROCESS	114	10	2.39408e-10	3.78705e-08	CYP1B1:TLR2:CYP2C18:CYP2C19:CYP2C9:CYP2C8:CYP2E1:CYP1A1:CYP1A2:ABCC1	http://www.gsea-msigdb.org/gsea/msigdb/human/geneset/GOBP_ICOSANOID_METABOLIC_PROCESS
GO_bp	GOBP_ETHANOL_METABOLIC_PROCESS	19	6	3.12551e-10	4.84517e-08	SULT1C4:SULT1B1:SULT1E1:SULT1A2:SULT1A1:SULT2A1	http://www.gsea-msigdb.org/gsea/msigdb/human/geneset/GOBP_ETHANOL_METABOLIC_PROCESS
GO_bp	GOBP_SULFUR_COMPOUND_METABOLIC_PROCESS	307	14	3.52823e-10	5.36221e-08	FMO3:FMO1:SULT1C2:SULT1C4:SULT1B1:SULT1E1:GUSB:SULT1A2:SULT1A1:SULT2A1:SULT2B1:SULT4A1:PDHA1:PDK3	http://www.gsea-msigdb.org/gsea/msigdb/human/geneset/GOBP_SULFUR_COMPOUND_METABOLIC_PROCESS
GO_bp	GOBP_VASCULAR_PROCESS_IN_CIRCULATORY_SYSTEM	257	13	4.41003e-10	6.57348e-08	SLC16A1:ABCC5:ABCG2:SLC22A5:ABCB1:ABCC2:SLC22A8:SLC16A7:ABCC4:ABCC1:ABCC3:SLC5A1:SLC16A2	http://www.gsea-msigdb.org/gsea/msigdb/human/geneset/GOBP_VASCULAR_PROCESS_IN_CIRCULATORY_SYSTEM
GO_bp	GOBP_FLAVONOID_GLUCURONIDATION	4	4	5.46438e-10	7.99139e-08	UGT1A8:UGT1A9:UGT1A7:UGT1A3:UGT1A1	http://www.gsea-msigdb.org/gsea/msigdb/human/geneset/GOBP_FLAVONOID_GLUCURONIDATION
GO_bp	GOBP_ICOSANOID_TRANSPORT	62	8	7.06076e-10	1.01348e-07	SLC22A7:ABCC2:SLC22A6:SLC22A8:SLC22A11:ABCC4:ABCC1:ABCC3	http://www.gsea-msigdb.org/gsea/msigdb/human/geneset/GOBP_ICOSANOID_TRANSPORT
GO_bp	GOBP_LONG_CHAIN_FATTY_ACID_BIOSYNTHETIC_PROCESS	26	6	2.5791e-09	3.63465e-07	CYP3A4:CYP2C9:CYP2C8:CYP2E1:CYP1A1:CYP1A2	http://www.gsea-msigdb.org/gsea/msigdb/human/geneset/GOBP_LONG_CHAIN_FATTY_ACID_BIOSYNTHETIC_PROCESS
GO_bp	GOBP_OLEFINIC_COMPOUND_METABOLIC_PROCESS	146	10	2.73114e-09	3.78019e-07	CYP1B1:CYP3A5:CYP3A4:CYP2C18:CYP2C19:CYP2C9:CYP2C8:CYP2E1:CYP1A1:CYP1A2	http://www.gsea-msigdb.org/gsea/msigdb/human/geneset/GOBP_OLEFINIC_COMPOUND_METABOLIC_PROCESS
GO_bp	GOBP_RETINOL_METABOLIC_PROCESS	49	7	4.09097e-09	5.52493e-07	CYP1B1:CYP3A5:CYP3A4:CYP2C18:CYP2C8:CYP1A1:CYP1A2	http://www.gsea-msigdb.org/gsea/msigdb/human/geneset/GOBP_RETINOL_METABOLIC_PROCESS
GO_bp	GOBP_PIGMENT_METABOLIC_PROCESS	77	8	4.13425e-09	5.52493e-07	LCT:UGT1A10:UGT1A9:UGT1A7:UGT1A4:UGT1A1:ABCC2:ABCC1	http://www.gsea-msigdb.org/gsea/msigdb/human/geneset/GOBP_PIGMENT_METABOLIC_PROCESS
GO_bp	GOBP_ORGANIC_ACID_TRANSMEMBRANE_TRANSPORT	153	10	4.30227e-09	5.65202e-07	ABCD3:SLC16A1:ABCC5:ABCB1:SLC22A9:SLC16A7:AKT1:ABCC1:SLC16A8:SLC16A2	http://www.gsea-msigdb.org/gsea/msigdb/human/geneset/GOBP_ORGANIC_ACID_TRANSMEMBRANE_TRANSPORT
GO_bp	GOBP_NUCLEOSIDE_BISPHOSPHATE_METABOLIC_PROCESS	117	9	6.31606e-09	8.15929e-07	SULT1C4:SULT1B1:SULT1E1:SULT1A2:SULT1A1:SULT2A1:SULT2B1:PDHA1:PDK3	http://www.gsea-msigdb.org/gsea/msigdb/human/geneset/GOBP_NUCLEOSIDE_BISPHOSPHATE_METABOLIC_PROCESS
GO_bp	GOBP_LEUKOTRIENE_TRANSPORT	6	4	8.13462e-09	1.01696e-06	ABCC2:ABCC4:ABCC1:ABCC3	http://www.gsea-msigdb.org/gsea/msigdb/human/geneset/GOBP_LEUKOTRIENE_TRANSPORT
GO_bp	GOBP_XENOBIOTIC_TRANSPORT_ACROSS_BLOOD_BRAIN_BARRIER	6	4	8.13462e-09	1.01696e-06	ABCG2:ABCB1:ABCC2:ABCC1	http://www.gsea-msigdb.org/gsea/msigdb/human/geneset/GOBP_XENOBIOTIC_TRANSPORT_ACROSS_BLOOD_BRAIN_BARRIER
GO_bp	GOBP_NUCLEOBASE_CONTAINING_SMALL_MOLECULE_METABOLIC_PROCESS	631	17	1.24832e-08	1.53583e-06	FMO5:ARNT:FMO2:FMO1:SULT1C4:SLC22A13:SULT1B1:SULT1E1:LDHA:LDHB:HIF1A:SULT1A2:SULT1A1:SULT2A1:SULT2B1:PDHA1:PDK3	http://www.gsea-msigdb.org/gsea/msigdb/human/geneset/GOBP_NUCLEOBASE_CONTAINING_SMALL_MOLECULE_METABOLIC_PROCESS
GO_bp	GOBP_INORGANIC_ANION_TRANSPORT	177	10	1.7455e-08	2.11397e-06	ABCC5:ABCB1:ABCC2:SLC22A6:SLC22A8:SLC22A11:ABCC4:ABCC1:ABCC3:SLC5A1	http://www.gsea-msigdb.org/gsea/msigdb/human/geneset/GOBP_INORGANIC_ANION_TRANSPORT
GO_bp	GOBP_MYCOTOXIN_METABOLIC_PROCESS	7	4	1.89089e-08	2.25482e-06	NFE2L2:CYP3A5:CYP3A4:CYP1A2	http://www.gsea-msigdb.org/gsea/msigdb/human/geneset/GOBP_MYCOTOXIN_METABOLIC_PROCESS
GO_bp	GOBP_URATE_TRANSPORT	8	4	3.76747e-08	4.4245e-06	SLC22A13:ABCG2:SLC22A12:ABCC4	http://www.gsea-msigdb.org/gsea/msigdb/human/geneset/GOBP_URATE_TRANSPORT
GO_bp	GOBP_LIPID_MODIFICATION	193	10	3.97039e-08	4.5932e-06	ABCD3:FMO2:FMO1:FMO4:CYP3A5:CYP3A4:CYP2C8:CYP2E1:AKT1:CYP1A1	http://www.gsea-msigdb.org/gsea/msigdb/human/geneset/GOBP_LIPID_MODIFICATION
GO_bp	GOBP_CARBOHYDRATE_DERIVATIVE_METABOLIC_PROCESS	1058	21	4.26313e-08	4.85934e-06	AKR7A2:OVGP1:ARNT:SULT1C4:LCT:ABCC5:GBA3:SULT1B1:SULT1E1:UGT8:GUSB:SULF1:LDHA:HIF1A:SULT1A2:SULT1A1:SULT2A1:SULT2B1:SULF2:PDHA1:PDK3	http://www.gsea-msigdb.org/gsea/msigdb/human/geneset/GOBP_CARBOHYDRATE_DERIVATIVE_METABOLIC_PROCESS
GO_bp	GOBP_UNSATURATED_FATTY_ACID_METABOLIC_PROCESS	105	8	4.88887e-08	5.49184e-06	CYP1B1:CYP2C18:CYP2C19:CYP2C9:CYP2C8:CYP2E1:CYP1A1:CYP1A2	http://www.gsea-msigdb.org/gsea/msigdb/human/geneset/GOBP_UNSATURATED_FATTY_ACID_METABOLIC_PROCESS
GO_bp	GOBP_DIGESTIVE_SYSTEM_PROCESS	106	8	5.26652e-08	5.83155e-06	MUC13:MUC4:SLC22A5:TLR4:MUC6:MUC2:NOD2:SLC5A1	http://www.gsea-msigdb.org/gsea/msigdb/human/geneset/GOBP_DIGESTIVE_SYSTEM_PROCESS
GO_bp	GOBP_FATTY_ACID_TRANSPORT	114	8	9.3033e-08	1.01563e-05	ABCD3:SLC22A7:SLC22A6:SLC22A8:SLC22A9:SLC22A11:ABCC4:AKT1	http://www.gsea-msigdb.org/gsea/msigdb/human/geneset/GOBP_FATTY_ACID_TRANSPORT
GO_bp	GOBP_PORPHYRIN_CONTAINING_COMPOUND_METABOLIC_PROCESS	52	6	2.05599e-07	2.18301e-05	UGT1A4:UGT1A1:ABCC2:CYP1A1:CYP1A2:ABCC1	http://www.gsea-msigdb.org/gsea/msigdb/human/geneset/GOBP_PORPHYRIN_CONTAINING_COMPOUND_METABOLIC_PROCESS
GO_bp	GOBP_ALCOHOL_CATABOLIC_PROCESS	52	6	2.05599e-07	2.18301e-05	SULT1C4:SULT1B1:SULT1E1:SULT1A2:SULT1A1:SULT2A1	http://www.gsea-msigdb.org/gsea/msigdb/human/geneset/GOBP_ALCOHOL_CATABOLIC_PROCESS
GO_bp	GOBP_RESPONSE_TO_TOXIC_SUBSTANCE	233	10	2.31059e-07	2.40057e-05	CYP1B1:NFE2L2:ABCG2:TLR2:SLC22A5:AHR:ABCB1:MUC2:SLC22A8:CYP1A1	http://www.gsea-msigdb.org/gsea/msigdb/human/geneset/GOBP_RESPONSE_TO_TOXIC_SUBSTANCE
GO_bp	GOBP_PROSTAGLANDIN_TRANSPORT	28	5	2.32283e-07	2.40057e-05	SLC22A7:SLC22A6:SLC22A8:SLC22A11:ABCC4	http://www.gsea-msigdb.org/gsea/msigdb/human/geneset/GOBP_PROSTAGLANDIN_TRANSPORT
GO_bp	GOBP_POSITIVE_REGULATION_OF_VASCULAR_ENDOTHELIAL_GROWTH_FACTOR_PRODUCTION	29	5	2.7958e-07	2.85135e-05	ARNT:CYP1B1:SULF1:HIF1A:SULF2	http://www.gsea-msigdb.org/gsea/msigdb/human/geneset/GOBP_POSITIVE_REGULATION_OF_VASCULAR_ENDOTHELIAL_GROWTH_FACTOR_PRODUCTION
GO_bp	GOBP_DIGESTION	134	8	3.24754e-07	3.26905e-05	MUC13:MUC4:SLC22A5:TLR4:MUC6:MUC2:NOD2:SLC5A1	http://www.gsea-msigdb.org/gsea/msigdb/human/geneset/GOBP_DIGESTION
GO_bp	GOBP_XENOBIOTIC_TRANSMEMBRANE_TRANSPORT	13	4	3.77596e-07	3.70474e-05	ABCC5:ABCC2:ABCC4:ABCC3	http://www.gsea-msigdb.org/gsea/msigdb/human/geneset/GOBP_XENOBIOTIC_TRANSMEMBRANE_TRANSPORT
GO_bp	GOBP_TETRAPYRROLE_CATABOLIC_PROCESS	13	4	3.77596e-07	3.70474e-05	UGT1A4:UGT1A1:ABCC2:ABCC1	http://www.gsea-msigdb.org/gsea/msigdb/human/geneset/GOBP_TETRAPYRROLE_CATABOLIC_PROCESS
GO_bp	GOBP_TETRAPYRROLE_METABOLIC_PROCESS	61	6	5.40993e-07	5.24155e-05	UGT1A4:UGT1A1:ABCC2:CYP1A1:CYP1A2:ABCC1	http://www.gsea-msigdb.org/gsea/msigdb/human/geneset/GOBP_TETRAPYRROLE_METABOLIC_PROCESS
GO_bp	GOBP_TRANSEPITHELIAL_TRANSPORT	33	5	5.50081e-07	5.2638e-05	ABCG2:ABCB1:ABCC2:ABCC1:SLC5A1	http://www.gsea-msigdb.org/gsea/msigdb/human/geneset/GOBP_TRANSEPITHELIAL_TRANSPORT
GO_bp	GOBP_SECONDARY_ALCOHOL_METABOLIC_PROCESS	147	8	6.58648e-07	6.22583e-05	FMO5:UGT1A8:UGT1A4:UGT1A3:CYP3A4:CYP2C9:CYP1A2:SULT2A1:SULT2B1	http://www.gsea-msigdb.org/gsea/msigdb/human/geneset/GOBP_SECONDARY_ALCOHOL_METABOLIC_PROCESS
GO_bp	GOBP_NEGATIVE_REGULATION_OF_FATTY_ACID_OXIDATION	15	4	7.15423e-07	6.67083e-05	FMO2:FMO1:FMO4:AKT1	http://www.gsea-msigdb.org/gsea/msigdb/human/geneset/GOBP_NEGATIVE_REGULATION_OF_FATTY_ACID_OXIDATION
GO_bp	GOBP_LIPID_LOCALIZATION	482	13	7.22939e-07	6.67083e-05	ABCD3:ABCG2:SLC22A7:ABCB1:ABCC2:SLC22A6:SLC22A8:SLC22A9:SLC22A11:ABCC4:AKT1:ABCC1:ABCC3	http://www.gsea-msigdb.org/gsea/msigdb/human/geneset/GOBP_LIPID_LOCALIZATION
GO_bp	GOBP_PHENOL_CONTAINING_COMPOUND_METABOLIC_PROCESS	105	7	8.64814e-07	7.82127e-05	SULT1B1:CYP2E1:SULT1A2:SULT1A1:SULT2A1:COMT:SLC16A2	http://www.gsea-msigdb.org/gsea/msigdb/human/geneset/GOBP_PHENOL_CONTAINING_COMPOUND_METABOLIC_PROCESS
GO_bp	GOBP_DEMETHYLATION	66	6	8.67797e-07	7.82127e-05	CYP3A5:CYP3A4:CYP3A43:CYP2C9:CYP2C8:CYP1A2	http://www.gsea-msigdb.org/gsea/msigdb/human/geneset/GOBP_DEMETHYLATION
GO_bp	GOBP_NADPH_OXIDATION	5	3	1.13651e-06	0.000101254	FMO5:FMO2:FMO1	http://www.gsea-msigdb.org/gsea/msigdb/human/geneset/GOBP_NADPH_OXIDATION
GO_bp	GOBP_PYRUVATE_METABOLIC_PROCESS	110	7	1.18498e-06	0.000104373	SLC16A1:ARNT:LDHA:LDHB:HIF1A:PDHA1:PDK3	http://www.gsea-msigdb.org/gsea/msigdb/human/geneset/GOBP_PYRUVATE_METABOLIC_PROCESS
GO_bp	GOBP_POSITIVE_REGULATION_OF_NITRIC_OXIDE_SYNTHASE_BIOSYNTHETIC_PROCESS	17	4	1.23799e-06	0.000107816	TLR2:TLR4:NOD2:CCL2	http://www.gsea-msigdb.org/gsea/msigdb/human/geneset/GOBP_POSITIVE_REGULATION_OF_NITRIC_OXIDE_SYNTHASE_BIOSYNTHETIC_PROCESS
GO_bp	GOBP_NEGATIVE_REGULATION_OF_FATTY_ACID_METABOLIC_PROCESS	39	5	1.30352e-06	0.000112262	FMO2:FMO1:FMO4:SLC22A13:AKT1	http://www.gsea-msigdb.org/gsea/msigdb/human/geneset/GOBP_NEGATIVE_REGULATION_OF_FATTY_ACID_METABOLIC_PROCESS
GO_bp	GOBP_RIBOSE_PHOSPHATE_METABOLIC_PROCESS	442	12	1.85068e-06	0.000156326	ARNT:SULT1C4:SULT1B1:SULT1E1:LDHA:HIF1A:SULT1A2:SULT1A1:SULT2A1:SULT2B1:PDHA1:PDK3	http://www.gsea-msigdb.org/gsea/msigdb/human/geneset/GOBP_RIBOSE_PHOSPHATE_METABOLIC_PROCESS
GO_bp	GOBP_EXPORT_ACROSS_PLASMA_MEMBRANE	75	6	1.8555e-06	0.000156326	ABCC5:ABCG2:SLC22A5:ABCB1:ABCC4:ABCC1	http://www.gsea-msigdb.org/gsea/msigdb/human/geneset/GOBP_EXPORT_ACROSS_PLASMA_MEMBRANE
GO_bp	GOBP_ALKALOID_METABOLIC_PROCESS	6	3	2.26489e-06	0.000184791	CYP3A5:CYP3A4:CYP1A2	http://www.gsea-msigdb.org/gsea/msigdb/human/geneset/GOBP_ALKALOID_METABOLIC_PROCESS
GO_bp	GOBP_VITAMIN_D3_METABOLIC_PROCESS	6	3	2.26489e-06	0.000184791	UGT1A8:UGT1A4:UGT1A3:CYP3A4	http://www.gsea-msigdb.org/gsea/msigdb/human/geneset/GOBP_VITAMIN_D3_METABOLIC_PROCESS
GO_bp	GOBP_LACTATE_TRANSMEMBRANE_TRANSPORT	6	3	2.26489e-06	0.000184791	SLC16A1:SLC16A7:SLC16A8	http://www.gsea-msigdb.org/gsea/msigdb/human/geneset/GOBP_LACTATE_TRANSMEMBRANE_TRANSPORT
GO_bp	GOBP_VITAMIN_D_METABOLIC_PROCESS	20	4	2.49172e-06	0.000199107	UGT1A8:UGT1A4:UGT1A3:CYP3A4:CYP1A1	http://www.gsea-msigdb.org/gsea/msigdb/human/geneset/GOBP_VITAMIN_D_METABOLIC_PROCESS
GO_bp	GOBP_GLYCOSIDE_METABOLIC_PROCESS	20	4	2.49172e-06	0.000199107	AKR7A2:SULT1C4:GBA3:GUSB	http://www.gsea-msigdb.org/gsea/msigdb/human/geneset/GOBP_GLYCOSIDE_METABOLIC_PROCESS
GO_bp	GOBP_SMALL_MOLECULE_CATABOLIC_PROCESS	377	11	2.55588e-06	0.000202149	ABCD3:SLC16A1:SULT1C4:SULT1B1:SULT1E1:CYP3A4:AKT1:CYP1A1:SULT1A2:SULT1A1:SULT2A1	http://www.gsea-msigdb.org/gsea/msigdb/human/geneset/GOBP_SMALL_MOLECULE_CATABOLIC_PROCESS
GO_bp	GOBP_NITRIC_OXIDE_SYNTHASE_BIOSYNTHETIC_PROCESS	21	4	3.06638e-06	0.000240076	TLR2:TLR4:NOD2:CCL2	http://www.gsea-msigdb.org/gsea/msigdb/human/geneset/GOBP_NITRIC_OXIDE_SYNTHASE_BIOSYNTHETIC_PROCESS
GO_bp	GOBP_GLUTATHIONE_TRANSMEMBRANE_TRANSPORT	7	3	3.94937e-06	0.000306116	ABCC5:ABCC4:ABCC1	http://www.gsea-msigdb.org/gsea/msigdb/human/geneset/GOBP_GLUTATHIONE_TRANSMEMBRANE_TRANSPORT
GO_bp	GOBP_ORGANOPHOSPHATE_METABOLIC_PROCESS	969	17	5.03361e-06	0.000386292	FMO5:ARNT:FMO2:FMO1:SULT1C4:SLC22A13:SULT1B1:SULT1E1:LDHA:LDHB:HIF1A:SULT1A2:SULT1A1:SULT2A1:SULT2B1:PDHA1:PDK3	http://www.gsea-msigdb.org/gsea/msigdb/human/geneset/GOBP_ORGANOPHOSPHATE_METABOLIC_PROCESS
GO_bp	GOBP_CIRCULATORY_SYSTEM_PROCESS	580	13	5.5213e-06	0.000419565	SLC16A1:ABCC5:ABCG2:SLC22A5:ABCB1:ABCC2:SLC22A8:SLC16A7:ABCC4:ABCC1:ABCC3:SLC5A1:SLC16A2	http://www.gsea-msigdb.org/gsea/msigdb/human/geneset/GOBP_CIRCULATORY_SYSTEM_PROCESS
GO_bp	GOBP_CARBOHYDRATE_METABOLIC_PROCESS	582	13	5.72962e-06	0.000431168	AKR7A2:OVGP1:ARNT:LCT:SLC2A2:GBA3:GUSB:KCNJ11:LDHA:HIF1A:AKT1:PDHA1:PDK3	http://www.gsea-msigdb.org/gsea/msigdb/human/geneset/GOBP_CARBOHYDRATE_METABOLIC_PROCESS
GO_bp	GOBP_REGULATION_OF_FATTY_ACID_METABOLIC_PROCESS	92	6	6.14107e-06	0.000457687	FMO2:FMO1:FMO4:SLC22A13:AKT1:PDK3	http://www.gsea-msigdb.org/gsea/msigdb/human/geneset/GOBP_REGULATION_OF_FATTY_ACID_METABOLIC_PROCESS
GO_bp	GOBP_POSITIVE_REGULATION_OF_CYTOKINE_PRODUCTION_INVOLVED_IN_INFLAMMATORY_RESPONSE	25	4	6.38379e-06	0.000471245	MYD88:TLR4:HIF1A:NOD2	http://www.gsea-msigdb.org/gsea/msigdb/human/geneset/GOBP_POSITIVE_REGULATION_OF_CYTOKINE_PRODUCTION_INVOLVED_IN_INFLAMMATORY_RESPONSE
GO_bp	GOBP_GLAND_DEVELOPMENT	425	11	7.98067e-06	0.000583568	CYP1B1:UGT1A10:UGT1A9:UGT1A7:UGT1A1:SULF1:CDKN1B:HIF1A:AKT1:CYP1A1:SULF2	http://www.gsea-msigdb.org/gsea/msigdb/human/geneset/GOBP_GLAND_DEVELOPMENT
GO_bp	GOBP_ORGANIC_CYCLIC_COMPOUND_CATABOLIC_PROCESS	514	12	8.61104e-06	0.000623777	NFE2L2:UGT1A4:UGT1A1:MYD88:SULT1E1:CYP3A4:ABCC2:AKT1:CYP1A1:CYP1A2:ABCC1:COMT	http://www.gsea-msigdb.org/gsea/msigdb/human/geneset/GOBP_ORGANIC_CYCLIC_COMPOUND_CATABOLIC_PROCESS
GO_bp	GOBP_CELLULAR_KETONE_METABOLIC_PROCESS	208	8	8.75231e-06	0.00062814	AKR7A2:FMO2:FMO1:FMO4:SULT1C4:SLC22A13:AKT1:PDK3	http://www.gsea-msigdb.org/gsea/msigdb/human/geneset/GOBP_CELLULAR_KETONE_METABOLIC_PROCESS
GO_bp	GOBP_GLUTATHIONE_TRANSPORT	9	3	9.41081e-06	0.000669203	ABCC5:ABCC4:ABCC1	http://www.gsea-msigdb.org/gsea/msigdb/human/geneset/GOBP_GLUTATHIONE_TRANSPORT
GO_bp	GOBP_STEROL_METABOLIC_PROCESS	152	7	1.0166e-05	0.000716331	FMO5:CYP1B1:CYP3A4:CYP2C9:CYP1A2:SULT2A1:SULT2B1	http://www.gsea-msigdb.org/gsea/msigdb/human/geneset/GOBP_STEROL_METABOLIC_PROCESS
GO_bp	GOBP_VASCULAR_ENDOTHELIAL_GROWTH_FACTOR_PRODUCTION	60	5	1.13917e-05	0.00079547	ARNT:CYP1B1:SULF1:HIF1A:SULF2	http://www.gsea-msigdb.org/gsea/msigdb/human/geneset/GOBP_VASCULAR_ENDOTHELIAL_GROWTH_FACTOR_PRODUCTION
GO_bp	GOBP_FATTY_ACID_BIOSYNTHETIC_PROCESS	155	7	1.15483e-05	0.000799206	ABCD3:CYP3A4:CYP2C9:CYP2C8:CYP2E1:CYP1A1:CYP1A2	http://www.gsea-msigdb.org/gsea/msigdb/human/geneset/GOBP_FATTY_ACID_BIOSYNTHETIC_PROCESS
GO_bp	GOBP_POSITIVE_REGULATION_OF_INTERLEUKIN_8_PRODUCTION	62	5	1.33925e-05	0.000918628	TLR5:MYD88:TLR2:TLR4:NOD2	http://www.gsea-msigdb.org/gsea/msigdb/human/geneset/GOBP_POSITIVE_REGULATION_OF_INTERLEUKIN_8_PRODUCTION
GO_bp	GOBP_BILE_ACID_AND_BILE_SALT_TRANSPORT	30	4	1.35708e-05	0.000922693	ABCD3:ABCC2:ABCC4:ABCC3	http://www.gsea-msigdb.org/gsea/msigdb/human/geneset/GOBP_BILE_ACID_AND_BILE_SALT_TRANSPORT
GO_bp	GOBP_LIPOPOLYSACCHARIDE_MEDIATED_SIGNALING_PATHWAY	63	5	1.44904e-05	0.000976651	MYD88:TLR2:TLR4:AKT1:CCL2	http://www.gsea-msigdb.org/gsea/msigdb/human/geneset/GOBP_LIPOPOLYSACCHARIDE_MEDIATED_SIGNALING_PATHWAY
GO_bp	GOBP_NEGATIVE_REGULATION_OF_LIPID_METABOLIC_PROCESS	107	6	1.46633e-05	0.000979788	FMO2:FMO1:FMO4:UGT1A1:SLC22A13:AKT1	http://www.gsea-msigdb.org/gsea/msigdb/human/geneset/GOBP_NEGATIVE_REGULATION_OF_LIPID_METABOLIC_PROCESS
GO_bp	GOBP_MULTICELLULAR_ORGANISMAL_LEVEL_HOMEOSTASIS	739	14	1.58554e-05	0.00105039	ARNT:FMO2:FMO1:FMO4:MUC13:MUC4:EMCN:SLC22A5:TLR4:MUC6:MUC2:HIF1A:AKT1:NOD2	http://www.gsea-msigdb.org/gsea/msigdb/human/geneset/GOBP_MULTICELLULAR_ORGANISMAL_LEVEL_HOMEOSTASIS
GO_bp	GOBP_DETECTION_OF_MOLECULE_OF_BACTERIAL_ORIGIN	11	3	1.83536e-05	0.00119545	TLR2:TLR4:NOD2	http://www.gsea-msigdb.org/gsea/msigdb/human/geneset/GOBP_DETECTION_OF_MOLECULE_OF_BACTERIAL_ORIGIN
GO_bp	GOBP_PIGMENT_CATABOLIC_PROCESS	11	3	1.83536e-05	0.00119545	UGT1A4:ABCC2:ABCC1	http://www.gsea-msigdb.org/gsea/msigdb/human/geneset/GOBP_PIGMENT_CATABOLIC_PROCESS
GO_bp	GOBP_AMINE_METABOLIC_PROCESS	112	6	1.90293e-05	0.00122913	SULT1C2:SULT1B1:CYP1A1:SULT1A2:SULT1A1:COMT	http://www.gsea-msigdb.org/gsea/msigdb/human/geneset/GOBP_AMINE_METABOLIC_PROCESS
GO_bp	GOBP_POSITIVE_REGULATION_OF_CHEMOKINE_PRODUCTION	68	5	2.10751e-05	0.00135002	MYD88:TLR2:TLR4:HIF1A:NOD2	http://www.gsea-msigdb.org/gsea/msigdb/human/geneset/GOBP_POSITIVE_REGULATION_OF_CHEMOKINE_PRODUCTION
GO_bp	GOBP_ORGANIC_ACID_BIOSYNTHETIC_PROCESS	312	9	2.37303e-05	0.00150765	ABCD3:FMO3:FMO1:CYP3A4:CYP2C9:CYP2C8:CYP2E1:CYP1A1:CYP1A2	http://www.gsea-msigdb.org/gsea/msigdb/human/geneset/GOBP_ORGANIC_ACID_BIOSYNTHETIC_PROCESS
GO_bp	GOBP_CELLULAR_RESPONSE_TO_OXIDISED_LOW_DENSITY_LIPOPROTEIN_PARTICLE_STIMULUS	12	3	2.43839e-05	0.00153659	MYD88:TLR4:AKT1	http://www.gsea-msigdb.org/gsea/msigdb/human/geneset/GOBP_CELLULAR_RESPONSE_TO_OXIDISED_LOW_DENSITY_LIPOPROTEIN_PARTICLE_STIMULUS
GO_bp	GOBP_REGULATION_OF_FATTY_ACID_OXIDATION	35	4	2.54429e-05	0.00159038	FMO2:FMO1:FMO4:AKT1	http://www.gsea-msigdb.org/gsea/msigdb/human/geneset/GOBP_REGULATION_OF_FATTY_ACID_OXIDATION
GO_bp	GOBP_REGULATION_OF_SMALL_MOLECULE_METABOLIC_PROCESS	317	9	2.68787e-05	0.00166669	FMO5:ARNT:FMO2:FMO1:FMO4:SLC22A13:HIF1A:AKT1:PDK3	http://www.gsea-msigdb.org/gsea/msigdb/human/geneset/GOBP_REGULATION_OF_SMALL_MOLECULE_METABOLIC_PROCESS
GO_bp	GOBP_RENAL_SYSTEM_PROCESS	120	6	2.81454e-05	0.00173139	ABCG2:SULF1:SLC22A6:SLC22A12:SULF2:SLC5A1	http://www.gsea-msigdb.org/gsea/msigdb/human/geneset/GOBP_RENAL_SYSTEM_PROCESS
GO_bp	GOBP_URATE_METABOLIC_PROCESS	13	3	3.15859e-05	0.00192773	ABCG2:SLC22A11:SLC22A12	http://www.gsea-msigdb.org/gsea/msigdb/human/geneset/GOBP_URATE_METABOLIC_PROCESS
GO_bp	GOBP_LIPID_CATABOLIC_PROCESS	324	9	3.18776e-05	0.00193034	ABCD3:CYP1B1:LCT:GBA3:SULT1E1:CYP3A4:AKT1:CYP1A2:SULT2A1	http://www.gsea-msigdb.org/gsea/msigdb/human/geneset/GOBP_LIPID_CATABOLIC_PROCESS
GO_bp	GOBP_REGULATION_OF_LIPID_METABOLIC_PROCESS	336	9	4.22835e-05	0.0025215	FMO5:FMO2:FMO1:FMO4:UGT1A1:SLC22A13:AKT1:NOD2:PDK3	http://www.gsea-msigdb.org/gsea/msigdb/human/geneset/GOBP_REGULATION_OF_LIPID_METABOLIC_PROCESS
GO_bp	GOBP_REGULATION_OF_CELLULAR_KETONE_METABOLIC_PROCESS	129	6	4.22907e-05	0.0025215	FMO2:FMO1:FMO4:SLC22A13:AKT1:PDK3	http://www.gsea-msigdb.org/gsea/msigdb/human/geneset/GOBP_REGULATION_OF_CELLULAR_KETONE_METABOLIC_PROCESS
GO_bp	GOBP_HOMEOSTATIC_PROCESS	1637	21	4.28995e-05	0.00253827	SLC16A1:ARNT:FMO2:FMO1:FMO4:NFE2L2:MUC13:SLC2A2:MUC4:EMCN:SLC22A5:MUC17:RN7SKP54:TLR4:MUC6:MUC2:SLC22A12:HIF1A:AKT1:NOD2:CCL2:PDK3	http://www.gsea-msigdb.org/gsea/msigdb/human/geneset/GOBP_HOMEOSTATIC_PROCESS
GO_bp	GOBP_FAT_SOLUBLE_VITAMIN_METABOLIC_PROCESS	41	4	4.81066e-05	0.00282481	UGT1A8:UGT1A4:UGT1A3:CYP3A4:CYP1A1	http://www.gsea-msigdb.org/gsea/msigdb/human/geneset/GOBP_FAT_SOLUBLE_VITAMIN_METABOLIC_PROCESS
GO_bp	GOBP_PYRIDINE_CONTAINING_COMPOUND_METABOLIC_PROCESS	83	5	5.5369e-05	0.00320629	FMO5:FMO2:FMO1:SLC22A13:LDHB	http://www.gsea-msigdb.org/gsea/msigdb/human/geneset/GOBP_PYRIDINE_CONTAINING_COMPOUND_METABOLIC_PROCESS
GO_bp	GOBP_RESPONSE_TO_MOLECULE_OF_BACTERIAL_ORIGIN	348	9	5.54306e-05	0.00320629	FMO1:UGT1A1:MYD88:TLR2:TLR4:AKT1:CYP1A1:NOD2:CCL2	http://www.gsea-msigdb.org/gsea/msigdb/human/geneset/GOBP_RESPONSE_TO_MOLECULE_OF_BACTERIAL_ORIGIN
GO_bp	GOBP_INTRINSIC_APOPTOTIC_SIGNALING_PATHWAY_IN_RESPONSE_TO_OXIDATIVE_STRESS	43	4	5.81829e-05	0.00334056	CYP1B1:NFE2L2:HIF1A:AKT1	http://www.gsea-msigdb.org/gsea/msigdb/human/geneset/GOBP_INTRINSIC_APOPTOTIC_SIGNALING_PATHWAY_IN_RESPONSE_TO_OXIDATIVE_STRESS
GO_bp	GOBP_HEPATICOBILIARY_SYSTEM_DEVELOPMENT	137	6	5.91939e-05	0.00337362	UGT1A10:UGT1A9:UGT1A7:UGT1A1:CYP1A1:SULF2	http://www.gsea-msigdb.org/gsea/msigdb/human/geneset/GOBP_HEPATICOBILIARY_SYSTEM_DEVELOPMENT
GO_bp	GOBP_REGULATION_OF_DNA_TEMPLATED_TRANSCRIPTION_IN_RESPONSE_TO_STRESS	44	4	6.376e-05	0.00360733	ARNT:MUC1:NFE2L2:HIF1A	http://www.gsea-msigdb.org/gsea/msigdb/human/geneset/GOBP_REGULATION_OF_DNA_TEMPLATED_TRANSCRIPTION_IN_RESPONSE_TO_STRESS
GO_bp	GOBP_NEGATIVE_REGULATION_OF_OXIDATIVE_STRESS_INDUCED_INTRINSIC_APOPTOTIC_SIGNALING_PATHWAY	17	3	7.4032e-05	0.00409873	NFE2L2:HIF1A:AKT1	http://www.gsea-msigdb.org/gsea/msigdb/human/geneset/GOBP_NEGATIVE_REGULATION_OF_OXIDATIVE_STRESS_INDUCED_INTRINSIC_APOPTOTIC_SIGNALING_PATHWAY
GO_bp	GOBP_LACTATE_METABOLIC_PROCESS	17	3	7.4032e-05	0.00409873	LDHA:LDHB:HIF1A	http://www.gsea-msigdb.org/gsea/msigdb/human/geneset/GOBP_LACTATE_METABOLIC_PROCESS
GO_bp	GOBP_GLYCOSYLCERAMIDE_METABOLIC_PROCESS	17	3	7.4032e-05	0.00409873	LCT:GBA3:UGT8	http://www.gsea-msigdb.org/gsea/msigdb/human/geneset/GOBP_GLYCOSYLCERAMIDE_METABOLIC_PROCESS
GO_bp	GOBP_ORGANIC_HYDROXY_COMPOUND_TRANSPORT	285	8	8.2612e-05	0.00449233	ABCD3:SLC16A1:ABCC2:SLC16A7:ABCC4:ABCC3:SLC5A1:SLC16A8	http://www.gsea-msigdb.org/gsea/msigdb/human/geneset/GOBP_ORGANIC_HYDROXY_COMPOUND_TRANSPORT
GO_bp	GOBP_BILE_ACID_METABOLIC_PROCESS	47	4	8.28321e-05	0.00449233	ABCD3:UGT2A1:UGT2A2:UGT2A1:SULT2A1	http://www.gsea-msigdb.org/gsea/msigdb/human/geneset/GOBP_BILE_ACID_METABOLIC_PROCESS
GO_bp	GOBP_MONOCARBOXYLIC_ACID_BIOSYNTHETIC_PROCESS	211	7	8.288e-05	0.00449233	ABCD3:CYP3A4:CYP2C9:CYP2C8:CYP2E1:CYP1A1:CYP1A2	http://www.gsea-msigdb.org/gsea/msigdb/human/geneset/GOBP_MONOCARBOXYLIC_ACID_BIOSYNTHETIC_PROCESS
GO_bp	GOBP_POSITIVE_REGULATION_OF_TRANSCRIPTION_FROM_RNA_POLYMERASE_II_PROMOTER_IN_RESPONSE_TO_STRESS	18	3	8.85213e-05	0.00473192	MUC1:NFE2L2:HIF1A	http://www.gsea-msigdb.org/gsea/msigdb/human/geneset/GOBP_POSITIVE_REGULATION_OF_TRANSCRIPTION_FROM_RNA_POLYMERASE_II_PROMOTER_IN_RESPONSE_TO_STRESS
GO_bp	GOBP_DETECTION_OF_OTHER_ORGANISM	18	3	8.85213e-05	0.00473192	TLR2:TLR4:NOD2	http://www.gsea-msigdb.org/gsea/msigdb/human/geneset/GOBP_DETECTION_OF_OTHER_ORGANISM
GO_bp	GOBP_CELL_DEATH_IN_RESPONSE_TO_OXIDATIVE_STRESS	92	5	9.0554e-05	0.00480742	CYP1B1:NFE2L2:TLR4:HIF1A:AKT1	http://www.gsea-msigdb.org/gsea/msigdb/human/geneset/GOBP_CELL_DEATH_IN_RESPONSE_TO_OXIDATIVE_STRESS
GO_bp	GOBP_EXPORT_FROM_CELL	870	14	9.28241e-05	0.00489442	SLC16A1:SLC2A2:ABCC5:ABCG2:TLR2:SLC22A5:ABCB1:TLR4:ABCC2:KCNJ11:ABCC4:HIF1A:ABCC1:SLC16A2	http://www.gsea-msigdb.org/gsea/msigdb/human/geneset/GOBP_EXPORT_FROM_CELL
GO_bp	GOBP_POSITIVE_REGULATION_OF_CYTOKINE_PRODUCTION	471	10	0.000109983	0.00575996	ARNT:TLR5:CYP1B1:MYD88:TLR2:SULF1:TLR4:HIF1A:NOD2:SULF2	http://www.gsea-msigdb.org/gsea/msigdb/human/geneset/GOBP_POSITIVE_REGULATION_OF_CYTOKINE_PRODUCTION
GO_bp	GOBP_VITAMIN_TRANSPORT	51	4	0.000114315	0.00594668	SLC2A2:ABCC5:ABCG2:ABCC1	http://www.gsea-msigdb.org/gsea/msigdb/human/geneset/GOBP_VITAMIN_TRANSPORT
GO_bp	GOBP_CHEMOKINE_PRODUCTION	97	5	0.000116385	0.00601399	MYD88:TLR2:TLR4:HIF1A:NOD2	http://www.gsea-msigdb.org/gsea/msigdb/human/geneset/GOBP_CHEMOKINE_PRODUCTION
GO_bp	GOBP_FATTY_ACID_TRANSMEMBRANE_TRANSPORT	20	3	0.000122788	0.00630287	ABCD3:SLC22A9:AKT1	http://www.gsea-msigdb.org/gsea/msigdb/human/geneset/GOBP_FATTY_ACID_TRANSMEMBRANE_TRANSPORT
GO_bp	GOBP_REACTIVE_OXYGEN_SPECIES_METABOLIC_PROCESS	226	7	0.000127063	0.00647935	CYP1B1:NFE2L2:TLR4:HIF1A:CYP1A1:CYP1A2:PDK3	http://www.gsea-msigdb.org/gsea/msigdb/human/geneset/GOBP_REACTIVE_OXYGEN_SPECIES_METABOLIC_PROCESS
GO_bp	GOBP_INTERLEUKIN_8_PRODUCTION	100	5	0.000134387	0.00680807	TLR5:MYD88:TLR2:TLR4:NOD2	http://www.gsea-msigdb.org/gsea/msigdb/human/geneset/GOBP_INTERLEUKIN_8_PRODUCTION
GO_bp	GOBP_CARBOHYDRATE_CATABOLIC_PROCESS	160	6	0.000139343	0.0070133	ARNT:LCT:GBA3:GUSB:LDHA:HIF1A	http://www.gsea-msigdb.org/gsea/msigdb/human/geneset/GOBP_CARBOHYDRATE_CATABOLIC_PROCESS
GO_bp	GOBP_I_KAPPAB_PHOSPHORYLATION	21	3	0.000142742	0.00713802	TLR2:TLR4:AKT1	http://www.gsea-msigdb.org/gsea/msigdb/human/geneset/GOBP_I_KAPPAB_PHOSPHORYLATION
GO_bp	GOBP_NEGATIVE_REGULATION_OF_SMALL_MOLECULE_METABOLIC_PROCESS	103	5	0.000154449	0.00767391	FMO2:FMO1:FMO4:SLC22A13:AKT1	http://www.gsea-msigdb.org/gsea/msigdb/human/geneset/GOBP_NEGATIVE_REGULATION_OF_SMALL_MOLECULE_METABOLIC_PROCESS
GO_bp	GOBP_POSITIVE_REGULATION_OF_MACROPHAGE_CYTOKINE_PRODUCTION	22	3	0.000164691	0.00813069	MYD88:TLR4:NOD2	http://www.gsea-msigdb.org/gsea/msigdb/human/geneset/GOBP_POSITIVE_REGULATION_OF_MACROPHAGE_CYTOKINE_PRODUCTION
GO_bp	GOBP_RESPONSE_TO_OXYGEN_LEVELS	317	8	0.00017176	0.00842603	ARNT:NFE2L2:TLR2:CDKN1B:HIF1A:AKT1:CYP1A1:PDK3	http://www.gsea-msigdb.org/gsea/msigdb/human/geneset/GOBP_RESPONSE_TO_OXYGEN_LEVELS
GO_bp	GOBP_DETECTION_OF_EXTERNAL_BIOTIC_STIMULUS	23	3	0.000188719	0.00919975	TLR2:TLR4:NOD2	http://www.gsea-msigdb.org/gsea/msigdb/human/geneset/GOBP_DETECTION_OF_EXTERNAL_BIOTIC_STIMULUS
GO_bp	GOBP_STEROID_CATABOLIC_PROCESS	24	3	0.00021491	0.010411	SULT1E1:CYP3A4:CYP1A2	http://www.gsea-msigdb.org/gsea/msigdb/human/geneset/GOBP_STEROID_CATABOLIC_PROCESS
GO_bp	GOBP_PYRUVATE_TRANSMEMBRANE_TRANSPORT	5	2	0.000235472	0.0110615	SLC16A1:SLC16A7	http://www.gsea-msigdb.org/gsea/msigdb/human/geneset/GOBP_PYRUVATE_TRANSMEMBRANE_TRANSPORT
GO_bp	GOBP_SPHINGOLIPID_TRANSLOCATION	5	2	0.000235472	0.0110615	ABCB1:ABCC1	http://www.gsea-msigdb.org/gsea/msigdb/human/geneset/GOBP_SPHINGOLIPID_TRANSLOCATION
GO_bp	GOBP_POSITIVE_REGULATION_OF_TRANSCRIPTION_FROM_RNA_POLYMERASE_II_PROMOTER_IN_RESPONSE_TO_HYPOXIA	5	2	0.000235472	0.0110615	NFE2L2:HIF1A	http://www.gsea-msigdb.org/gsea/msigdb/human/geneset/GOBP_POSITIVE_REGULATION_OF_TRANSCRIPTION_FROM_RNA_POLYMERASE_II_PROMOTER_IN_RESPONSE_TO_HYPOXIA
GO_bp	GOBP_GALACTOSE_TRANSMEMBRANE_TRANSPORT	5	2	0.000235472	0.0110615	SLC2A2:SLC5A1	http://www.gsea-msigdb.org/gsea/msigdb/human/geneset/GOBP_GALACTOSE_TRANSMEMBRANE_TRANSPORT
GO_bp	GOBP_GLYCOSIDE_TRANSPORT	5	2	0.000235472	0.0110615	ABCC3:SLC5A1	http://www.gsea-msigdb.org/gsea/msigdb/human/geneset/GOBP_GLYCOSIDE_TRANSPORT
GO_bp	GOBP_LIPID_OXIDATION	114	5	0.000248171	0.0115878	ABCD3:FMO2:FMO1:FMO4:AKT1	http://www.gsea-msigdb.org/gsea/msigdb/human/geneset/GOBP_LIPID_OXIDATION
GO_bp	GOBP_TISSUE_HOMEOSTASIS	253	7	0.00025379	0.0117792	MUC13:MUC4:SLC22A5:TLR4:MUC6:MUC2:NOD2	http://www.gsea-msigdb.org/gsea/msigdb/human/geneset/GOBP_TISSUE_HOMEOSTASIS
GO_bp	GOBP_AMIDE_TRANSPORT	338	8	0.000265056	0.0122289	SLC16A1:SLC2A2:ABCC5:ABCG2:ABCB1:KCNJ11:HIF1A:SLC16A2	http://www.gsea-msigdb.org/gsea/msigdb/human/geneset/GOBP_AMIDE_TRANSPORT
GO_bp	GOBP_BENZENE_CONTAINING_COMPOUND_METABOLIC_PROCESS	26	3	0.000274106	0.0124976	CYP1B1:UGT1A1:CYP2E1	http://www.gsea-msigdb.org/gsea/msigdb/human/geneset/GOBP_BENZENE_CONTAINING_COMPOUND_METABOLIC_PROCESS
GO_bp	GOBP_XENOBIOTIC_EXPORT_FROM_CELL	26	3	0.000274106	0.0124976	SLC22A5:ABCB1:ABCC2	http://www.gsea-msigdb.org/gsea/msigdb/human/geneset/GOBP_XENOBIOTIC_EXPORT_FROM_CELL
GO_bp	GOBP_TOLL_LIKE_RECEPTOR_SIGNALING_PATHWAY	64	4	0.000276756	0.0125446	TLR5:MYD88:TLR2:TLR4	http://www.gsea-msigdb.org/gsea/msigdb/human/geneset/GOBP_TOLL_LIKE_RECEPTOR_SIGNALING_PATHWAY
GO_bp	GOBP_THYROID_HORMONE_METABOLIC_PROCESS	27	3	0.00030727	0.0137668	SULT1B1:SULT2A1:SLC16A2	http://www.gsea-msigdb.org/gsea/msigdb/human/geneset/GOBP_THYROID_HORMONE_METABOLIC_PROCESS
GO_bp	GOBP_REGULATION_OF_OXIDATIVE_STRESS_INDUCED_INTRINSIC_APOPTOTIC_SIGNALING_PATHWAY	27	3	0.00030727	0.0137668	NFE2L2:HIF1A:AKT1	http://www.gsea-msigdb.org/gsea/msigdb/human/geneset/GOBP_REGULATION_OF_OXIDATIVE_STRESS_INDUCED_INTRINSIC_APOPTOTIC_SIGNALING_PATHWAY
GO_bp	GOBP_RESPONSE_TO_OXYGEN_CONTAINING_COMPOUND	1749	20	0.000312766	0.0139325	FMO1:CYP1B1:NFE2L2:UGT1A1:MYD88:SLC2A2:TLR2:AHR:TLR4:CYP2E1:KCNJ11:SLC22A12:CDKN1B:HIF1A:AKT1:CYP1A1:ABCC1:NOD2:CCL2:PDK3	http://www.gsea-msigdb.org/gsea/msigdb/human/geneset/GOBP_RESPONSE_TO_OXYGEN_CONTAINING_COMPOUND
GO_bp	GOBP_CYTOKINE_PRODUCTION_INVOLVED_IN_INFLAMMATORY_RESPONSE	68	4	0.000349429	0.0151608	MYD88:TLR4:HIF1A:NOD2	http://www.gsea-msigdb.org/gsea/msigdb/human/geneset/GOBP_CYTOKINE_PRODUCTION_INVOLVED_IN_INFLAMMATORY_RESPONSE
GO_bp	GOBP_RESPONSE_TO_INORGANIC_SUBSTANCE	544	10	0.000349439	0.0151608	CYP1B1:NFE2L2:CYP2E1:MUC2:CDKN1B:HIF1A:AKT1:CYP1A1:CYP1A2:SLC5A1	http://www.gsea-msigdb.org/gsea/msigdb/human/geneset/GOBP_RESPONSE_TO_INORGANIC_SUBSTANCE
GO_bp	GOBP_HYPOXIA_INDUCIBLE_FACTOR_1ALPHA_SIGNALING_PATHWAY	6	2	0.000352076	0.0151608	HIF1A:PDK3	http://www.gsea-msigdb.org/gsea/msigdb/human/geneset/GOBP_HYPOXIA_INDUCIBLE_FACTOR_1ALPHA_SIGNALING_PATHWAY
GO_bp	GOBP_REGULATION_OF_CELLULAR_RESPONSE_TO_MACROPHAGE_COLONY_STIMULATING_FACTOR_STIMULUS	6	2	0.000352076	0.0151608	TLR2:TLR4	http://www.gsea-msigdb.org/gsea/msigdb/human/geneset/GOBP_REGULATION_OF_CELLULAR_RESPONSE_TO_MACROPHAGE_COLONY_STIMULATING_FACTOR_STIMULUS
GO_bp	GOBP_GUANINE_NUCLEOTIDE_TRANSPORT	6	2	0.000352076	0.0151608	ABCC5:ABCC4	http://www.gsea-msigdb.org/gsea/msigdb/human/geneset/GOBP_GUANINE_NUCLEOTIDE_TRANSPORT
GO_bp	GOBP_PHENYLPROPANOID_METABOLIC_PROCESS	6	2	0.000352076	0.0151608	UGT1A7:CYP1A1	http://www.gsea-msigdb.org/gsea/msigdb/human/geneset/GOBP_PHENYLPROPANOID_METABOLIC_PROCESS
GO_bp	GOBP_RESPONSE_TO_LIPID	885	13	0.000403177	0.0172489	FMO1:CYP1B1:UGT1A1:MYD88:TLR2:AHR:TLR4:CDKN1B:AKT1:CYP1A1:NOD2:CCL2:PDK3	http://www.gsea-msigdb.org/gsea/msigdb/human/geneset/GOBP_RESPONSE_TO_LIPID
GO_bp	GOBP_RESPONSE_TO_BACTERIUM	660	11	0.000405019	0.0172489	FMO1:UGT1A1:MYD88:TLR2:SLC22A5:TLR4:CYP2E1:AKT1:CYP1A1:NOD2:CCL2	http://www.gsea-msigdb.org/gsea/msigdb/human/geneset/GOBP_RESPONSE_TO_BACTERIUM
GO_bp	GOBP_CELLULAR_RESPONSE_TO_OXIDATIVE_STRESS	274	7	0.000410362	0.0173648	ARNT:CYP1B1:NFE2L2:TLR4:HIF1A:AKT1:ABCC1	http://www.gsea-msigdb.org/gsea/msigdb/human/geneset/GOBP_CELLULAR_RESPONSE_TO_OXIDATIVE_STRESS
GO_bp	GOBP_REGULATION_OF_OXIDATIVE_STRESS_INDUCED_CELL_DEATH	71	4	0.000412222	0.0173648	NFE2L2:TLR4:HIF1A:AKT1	http://www.gsea-msigdb.org/gsea/msigdb/human/geneset/GOBP_REGULATION_OF_OXIDATIVE_STRESS_INDUCED_CELL_DEATH
GO_bp	GOBP_RENAL_TUBULAR_SECRETION	30	3	0.000421961	0.017679	ABCG2:SLC22A6:SLC22A12	http://www.gsea-msigdb.org/gsea/msigdb/human/geneset/GOBP_RENAL_TUBULAR_SECRETION
GO_bp	GOBP_CELLULAR_RESPONSE_TO_OXYGEN_CONTAINING_COMPOUND	1262	16	0.000439808	0.0183277	CYP1B1:NFE2L2:UGT1A1:MYD88:SLC2A2:TLR2:AHR:TLR4:SLC22A12:CDKN1B:HIF1A:AKT1:ABCC1:NOD2:CCL2:PDK3	http://www.gsea-msigdb.org/gsea/msigdb/human/geneset/GOBP_CELLULAR_RESPONSE_TO_OXYGEN_CONTAINING_COMPOUND
GO_bp	GOBP_RESPONSE_TO_ORGANIC_CYCLIC_COMPOUND	896	13	0.00045303	0.0187777	ABCD3:SLC16A1:CYP1B1:UGT1A1:MYD88:TLR2:AHR:KCNJ11:SLC22A6:CDKN1B:CYP1A1:NOD2:CCL2	http://www.gsea-msigdb.org/gsea/msigdb/human/geneset/GOBP_RESPONSE_TO_ORGANIC_CYCLIC_COMPOUND
GO_bp	GOBP_INTESTINAL_EPITHELIAL_STRUCTURE_MAINTENANCE	7	2	0.000491327	0.0198348	SLC22A5:TLR4	http://www.gsea-msigdb.org/gsea/msigdb/human/geneset/GOBP_INTESTINAL_EPITHELIAL_STRUCTURE_MAINTENANCE
GO_bp	GOBP_REGULATION_OF_TRANSCRIPTION_FROM_RNA_POLYMERASE_II_PROMOTER_IN_RESPONSE_TO_OXIDATIVE_STRESS	7	2	0.000491327	0.0198348	ARNT:HIF1A	http://www.gsea-msigdb.org/gsea/msigdb/human/geneset/GOBP_REGULATION_OF_TRANSCRIPTION_FROM_RNA_POLYMERASE_II_PROMOTER_IN_RESPONSE_TO_OXIDATIVE_STRESS
GO_bp	GOBP_HYDROCARBON_METABOLIC_PROCESS	7	2	0.000491327	0.0198348	CYP2E1:CYP1A1	http://www.gsea-msigdb.org/gsea/msigdb/human/geneset/GOBP_HYDROCARBON_METABOLIC_PROCESS
GO_bp	GOBP_REGULATION_OF_T_CELL_MEDIATED_IMMUNE_RESPONSE_TO_TUMOR_CELL	7	2	0.000491327	0.0198348	SLC22A13:AHR	http://www.gsea-msigdb.org/gsea/msigdb/human/geneset/GOBP_REGULATION_OF_T_CELL_MEDIATED_IMMUNE_RESPONSE_TO_TUMOR_CELL
GO_bp	GOBP_GLYCOSYLCERAMIDE_CATABOLIC_PROCESS	7	2	0.000491327	0.0198348	LCT:GBA3	http://www.gsea-msigdb.org/gsea/msigdb/human/geneset/GOBP_GLYCOSYLCERAMIDE_CATABOLIC_PROCESS
GO_bp	GOBP_POSITIVE_REGULATION_OF_MYELOID_LEUKOCYTE_CYTOKINE_PRODUCTION_INVOLVED_IN_IMMUNE_RESPONSE	33	3	0.000561015	0.0224272	MYD88:TLR4:NOD2	http://www.gsea-msigdb.org/gsea/msigdb/human/geneset/GOBP_POSITIVE_REGULATION_OF_MYELOID_LEUKOCYTE_CYTOKINE_PRODUCTION_INVOLVED_IN_IMMUNE_RESPONSE
GO_bp	GOBP_CARBOHYDRATE_DERIVATIVE_TRANSPORT	77	4	0.00056133	0.0224272	ABCC5:ABCC4:ABCC3:SLC5A1	http://www.gsea-msigdb.org/gsea/msigdb/human/geneset/GOBP_CARBOHYDRATE_DERIVATIVE_TRANSPORT
GO_bp	GOBP_CELLULAR_RESPONSE_TO_LIPID	580	10	0.000575654	0.0228815	CYP1B1:UGT1A1:MYD88:TLR2:AHR:TLR4:AKT1:NOD2:CCL2:PDK3	http://www.gsea-msigdb.org/gsea/msigdb/human/geneset/GOBP_CELLULAR_RESPONSE_TO_LIPID
GO_bp	GOBP_GLYCOSYL_COMPOUND_METABOLIC_PROCESS	78	4	0.000589453	0.0233105	AKR7A2:SULT1C4:GBA3:GUSB	http://www.gsea-msigdb.org/gsea/msigdb/human/geneset/GOBP_GLYCOSYL_COMPOUND_METABOLIC_PROCESS
GO_bp	GOBP_DETOXIFICATION	138	5	0.000597023	0.02349	NFE2L2:ABCG2:SLC22A5:ABCB1:MUC2	http://www.gsea-msigdb.org/gsea/msigdb/human/geneset/GOBP_DETOXIFICATION
GO_bp	GOBP_CELLULAR_RESPONSE_TO_LIPOPROTEIN_PARTICLE_STIMULUS	34	3	0.000613118	0.0240014	MYD88:TLR4:AKT1	http://www.gsea-msigdb.org/gsea/msigdb/human/geneset/GOBP_CELLULAR_RESPONSE_TO_LIPOPROTEIN_PARTICLE_STIMULUS
GO_bp	GOBP_T_CELL_MEDIATED_IMMUNE_RESPONSE_TO_TUMOR_CELL	8	2	0.000653004	0.0251812	SLC22A13:AHR	http://www.gsea-msigdb.org/gsea/msigdb/human/geneset/GOBP_T_CELL_MEDIATED_IMMUNE_RESPONSE_TO_TUMOR_CELL
GO_bp	GOBP_REGULATION_OF_MATRIX_METALLOPEPTIDASE_SECRETION	8	2	0.000653004	0.0251812	TLR2:TLR4	http://www.gsea-msigdb.org/gsea/msigdb/human/geneset/GOBP_REGULATION_OF_MATRIX_METALLOPEPTIDASE_SECRETION
GO_bp	GOBP_WOUND_HEALING_INVOLVED_IN_INFLAMMATORY_RESPONSE	8	2	0.000653004	0.0251812	TLR4:HIF1A	http://www.gsea-msigdb.org/gsea/msigdb/human/geneset/GOBP_WOUND_HEALING_INVOLVED_IN_INFLAMMATORY_RESPONSE
GO_bp	GOBP_MACROPHAGE_CYTOKINE_PRODUCTION	35	3	0.000668213	0.0255139	MYD88:TLR4:NOD2	http://www.gsea-msigdb.org/gsea/msigdb/human/geneset/GOBP_MACROPHAGE_CYTOKINE_PRODUCTION
GO_bp	GOBP_DETECTION_OF_BIOTIC_STIMULUS	35	3	0.000668213	0.0255139	TLR2:TLR4:NOD2	http://www.gsea-msigdb.org/gsea/msigdb/human/geneset/GOBP_DETECTION_OF_BIOTIC_STIMULUS
GO_bp	GOBP_REGULATION_OF_REACTIVE_OXYGEN_SPECIES_METABOLIC_PROCESS	142	5	0.000679541	0.0257037	CYP1B1:NFE2L2:TLR4:HIF1A:PDK3	http://www.gsea-msigdb.org/gsea/msigdb/human/geneset/GOBP_REGULATION_OF_REACTIVE_OXYGEN_SPECIES_METABOLIC_PROCESS
GO_bp	GOBP_REACTIVE_NITROGEN_SPECIES_METABOLIC_PROCESS	81	4	0.000679817	0.0257037	CYP1B1:TLR2:TLR4:AKT1	http://www.gsea-msigdb.org/gsea/msigdb/human/geneset/GOBP_REACTIVE_NITROGEN_SPECIES_METABOLIC_PROCESS
GO_bp	GOBP_RESPONSE_TO_FOOD	37	3	0.000787648	0.0296362	SLC16A1:AKT1:CYP1A1	http://www.gsea-msigdb.org/gsea/msigdb/human/geneset/GOBP_RESPONSE_TO_FOOD
GO_bp	GOBP_CELLULAR_RESPONSE_TO_MOLECULE_OF_BACTERIAL_ORIGIN	223	6	0.000817996	0.0302708	MYD88:TLR2:TLR4:AKT1:NOD2:CCL2	http://www.gsea-msigdb.org/gsea/msigdb/human/geneset/GOBP_CELLULAR_RESPONSE_TO_MOLECULE_OF_BACTERIAL_ORIGIN
GO_bp	GOBP_GLYCOSIDE_CATABOLIC_PROCESS	9	2	0.000836887	0.0302708	GBA3:GUSB	http://www.gsea-msigdb.org/gsea/msigdb/human/geneset/GOBP_GLYCOSIDE_CATABOLIC_PROCESS
GO_bp	GOBP_TAURINE_METABOLIC_PROCESS	9	2	0.000836887	0.0302708	FMO3:FMO1	http://www.gsea-msigdb.org/gsea/msigdb/human/geneset/GOBP_TAURINE_METABOLIC_PROCESS
GO_bp	GOBP_GALACTOLIPID_METABOLIC_PROCESS	9	2	0.000836887	0.0302708	GBA3:UGT8	http://www.gsea-msigdb.org/gsea/msigdb/human/geneset/GOBP_GALACTOLIPID_METABOLIC_PROCESS
GO_bp	GOBP_POSITIVE_REGULATION_OF_HORMONE_BIOSYNTHETIC_PROCESS	9	2	0.000836887	0.0302708	ARNT:HIF1A	http://www.gsea-msigdb.org/gsea/msigdb/human/geneset/GOBP_POSITIVE_REGULATION_OF_HORMONE_BIOSYNTHETIC_PROCESS
GO_bp	GOBP_POLYKETIDE_METABOLIC_PROCESS	9	2	0.000836887	0.0302708	AKR7A2:SULT1C4	http://www.gsea-msigdb.org/gsea/msigdb/human/geneset/GOBP_POLYKETIDE_METABOLIC_PROCESS
GO_bp	GOBP_INTERLEUKIN_23_PRODUCTION	9	2	0.000836887	0.0302708	MYD88:TLR4	http://www.gsea-msigdb.org/gsea/msigdb/human/geneset/GOBP_INTERLEUKIN_23_PRODUCTION
GO_bp	GOBP_GLIAL_CELL_DERIVED_NEUROTROPHIC_FACTOR_RECEPTOR_SIGNALING_PATHWAY	9	2	0.000836887	0.0302708	SULF1:SULF2	http://www.gsea-msigdb.org/gsea/msigdb/human/geneset/GOBP_GLIAL_CELL_DERIVED_NEUROTROPHIC_FACTOR_RECEPTOR_SIGNALING_PATHWAY
GO_bp	GOBP_RESPONSE_TO_PEPTIDE	503	9	0.000839664	0.0302708	CYP1B1:NFE2L2:TLR2:TLR4:SLC22A12:CDKN1B:AKT1:ABCC1:NOD2	http://www.gsea-msigdb.org/gsea/msigdb/human/geneset/GOBP_RESPONSE_TO_PEPTIDE
GO_bp	GOBP_MEMBRANE_LIPID_CATABOLIC_PROCESS	38	3	0.000852121	0.0305777	CYP1B1:LCT:GBA3	http://www.gsea-msigdb.org/gsea/msigdb/human/geneset/GOBP_MEMBRANE_LIPID_CATABOLIC_PROCESS
GO_bp	GOBP_EXCRETION	39	3	0.00091985	0.03282	ABCG2:SLC22A6:SLC22A12	http://www.gsea-msigdb.org/gsea/msigdb/human/geneset/GOBP_EXCRETION
GO_bp	GOBP_RESPONSE_TO_NUTRIENT	152	5	0.000923075	0.03282	SLC16A1:CYP1B1:UGT1A1:CYP1A1:NOD2	http://www.gsea-msigdb.org/gsea/msigdb/human/geneset/GOBP_RESPONSE_TO_NUTRIENT
GO_bp	GOBP_RESPONSE_TO_OXIDATIVE_STRESS	410	8	0.000942908	0.0333721	ARNT:CYP1B1:NFE2L2:TLR4:CYP2E1:HIF1A:AKT1:ABCC1	http://www.gsea-msigdb.org/gsea/msigdb/human/geneset/GOBP_RESPONSE_TO_OXIDATIVE_STRESS
GO_bp	GOBP_DICARBOXYLIC_ACID_TRANSPORT	89	4	0.000968155	0.0341098	SLC16A1:ABCC5:ABCC2:SLC22A6	http://www.gsea-msigdb.org/gsea/msigdb/human/geneset/GOBP_DICARBOXYLIC_ACID_TRANSPORT
GO_bp	GOBP_RESPONSE_TO_COPPER_ION	40	3	0.000990899	0.0347532	NFE2L2:MUC2:CYP1A1	http://www.gsea-msigdb.org/gsea/msigdb/human/geneset/GOBP_RESPONSE_TO_COPPER_ION
GO_bp	GOBP_ACETYL_COA_BIOSYNTHETIC_PROCESS_FROM_PYRUVATE	10	2	0.00104276	0.0362441	PDHA1:PDK3	http://www.gsea-msigdb.org/gsea/msigdb/human/geneset/GOBP_ACETYL_COA_BIOSYNTHETIC_PROCESS_FROM_PYRUVATE
GO_bp	GOBP_RESPONSE_TO_LIPOTEICHOIC_ACID	10	2	0.00104276	0.0362441	TLR2:TLR4	http://www.gsea-msigdb.org/gsea/msigdb/human/geneset/GOBP_RESPONSE_TO_LIPOTEICHOIC_ACID
GO_bp	GOBP_NEGATIVE_REGULATION_OF_INTRINSIC_APOPTOTIC_SIGNALING_PATHWAY	91	4	0.00105185	0.0363968	MUC1:NFE2L2:HIF1A:AKT1	http://www.gsea-msigdb.org/gsea/msigdb/human/geneset/GOBP_NEGATIVE_REGULATION_OF_INTRINSIC_APOPTOTIC_SIGNALING_PATHWAY
GO_bp	GOBP_POSITIVE_REGULATION_OF_INTERLEUKIN_10_PRODUCTION	41	3	0.00106533	0.036537	TLR2:TLR4:NOD2	http://www.gsea-msigdb.org/gsea/msigdb/human/geneset/GOBP_POSITIVE_REGULATION_OF_INTERLEUKIN_10_PRODUCTION
GO_bp	GOBP_POSITIVE_REGULATION_OF_PATTERN_RECOGNITION_RECEPTOR_SIGNALING_PATHWAY	41	3	0.00106533	0.036537	TLR5:TLR2:TLR4	http://www.gsea-msigdb.org/gsea/msigdb/human/geneset/GOBP_POSITIVE_REGULATION_OF_PATTERN_RECOGNITION_RECEPTOR_SIGNALING_PATHWAY
GO_bp	GOBP_BIOGENIC_AMINE_METABOLIC_PROCESS	92	4	0.00109554	0.0374077	SULT1B1:SULT1A2:SULT1A1:COMT	http://www.gsea-msigdb.org/gsea/msigdb/human/geneset/GOBP_BIOGENIC_AMINE_METABOLIC_PROCESS
GO_bp	GOBP_POSITIVE_REGULATION_OF_INTERLEUKIN_6_PRODUCTION	93	4	0.0011405	0.0387719	MYD88:TLR2:TLR4:NOD2	http://www.gsea-msigdb.org/gsea/msigdb/human/geneset/GOBP_POSITIVE_REGULATION_OF_INTERLEUKIN_6_PRODUCTION
GO_bp	GOBP_CELLULAR_RESPONSE_TO_ALCOHOL	94	4	0.00118673	0.0399927	CYP1B1:UGT1A1:AHR:AKT1	http://www.gsea-msigdb.org/gsea/msigdb/human/geneset/GOBP_CELLULAR_RESPONSE_TO_ALCOHOL
GO_bp	GOBP_REGULATION_OF_RESPONSE_TO_OXIDATIVE_STRESS	94	4	0.00118673	0.0399927	NFE2L2:TLR4:HIF1A:AKT1	http://www.gsea-msigdb.org/gsea/msigdb/human/geneset/GOBP_REGULATION_OF_RESPONSE_TO_OXIDATIVE_STRESS
GO_bp	GOBP_POSITIVE_REGULATION_OF_INTERLEUKIN_12_PRODUCTION	43	3	0.00122458	0.0409126	TLR2:TLR4:NOD2	http://www.gsea-msigdb.org/gsea/msigdb/human/geneset/GOBP_POSITIVE_REGULATION_OF_INTERLEUKIN_12_PRODUCTION
GO_bp	GOBP_NADP_METABOLIC_PROCESS	43	3	0.00122458	0.0409126	FMO5:FMO2:FMO1	http://www.gsea-msigdb.org/gsea/msigdb/human/geneset/GOBP_NADP_METABOLIC_PROCESS
GO_bp	GOBP_PRODUCTION_OF_MOLECULAR_MEDIATOR_INVOLVED_IN_INFLAMMATORY_RESPONSE	95	4	0.00123426	0.0410589	MYD88:TLR4:HIF1A:NOD2	http://www.gsea-msigdb.org/gsea/msigdb/human/geneset/GOBP_PRODUCTION_OF_MOLECULAR_MEDIATOR_INVOLVED_IN_INFLAMMATORY_RESPONSE
GO_bp	GOBP_CELLULAR_RESPONSE_TO_CHEMICAL_STRESS	331	7	0.00124324	0.0411808	ARNT:CYP1B1:NFE2L2:TLR4:HIF1A:AKT1:ABCC1	http://www.gsea-msigdb.org/gsea/msigdb/human/geneset/GOBP_CELLULAR_RESPONSE_TO_CHEMICAL_STRESS
GO_bp	GOBP_REGULATION_OF_TRANSCRIPTION_FROM_RNA_POLYMERASE_II_PROMOTER_IN_RESPONSE_TO_HYPOXIA	11	2	0.00127041	0.0417242	NFE2L2:HIF1A	http://www.gsea-msigdb.org/gsea/msigdb/human/geneset/GOBP_REGULATION_OF_TRANSCRIPTION_FROM_RNA_POLYMERASE_II_PROMOTER_IN_RESPONSE_TO_HYPOXIA
GO_bp	GOBP_GLOMERULAR_BASEMENT_MEMBRANE_DEVELOPMENT	11	2	0.00127041	0.0417242	SULF1:SULF2	http://www.gsea-msigdb.org/gsea/msigdb/human/geneset/GOBP_GLOMERULAR_BASEMENT_MEMBRANE_DEVELOPMENT
GO_bp	GOBP_CELLULAR_RESPONSE_TO_OXYGEN_LEVELS	164	5	0.00129485	0.0423476	NFE2L2:CDKN1B:HIF1A:AKT1:PDK3	http://www.gsea-msigdb.org/gsea/msigdb/human/geneset/GOBP_CELLULAR_RESPONSE_TO_OXYGEN_LEVELS
GO_bp	GOBP_ENERGY_HOMEOSTASIS	44	3	0.00130952	0.0424689	FMO2:FMO1:FMO4	http://www.gsea-msigdb.org/gsea/msigdb/human/geneset/GOBP_ENERGY_HOMEOSTASIS
GO_bp	GOBP_CELLULAR_CARBOHYDRATE_CATABOLIC_PROCESS	44	3	0.00130952	0.0424689	LCT:GBA3:GUSB	http://www.gsea-msigdb.org/gsea/msigdb/human/geneset/GOBP_CELLULAR_CARBOHYDRATE_CATABOLIC_PROCESS
GO_bp	GOBP_REGULATION_OF_PATTERN_RECOGNITION_RECEPTOR_SIGNALING_PATHWAY	97	4	0.00133328	0.0430595	TLR5:TLR2:TLR4:NOD2	http://www.gsea-msigdb.org/gsea/msigdb/human/geneset/GOBP_REGULATION_OF_PATTERN_RECOGNITION_RECEPTOR_SIGNALING_PATHWAY
GO_bp	GOBP_RESPONSE_TO_ALCOHOL	246	6	0.00135495	0.0435777	CYP1B1:UGT1A1:MYD88:AHR:CYP2E1:AKT1	http://www.gsea-msigdb.org/gsea/msigdb/human/geneset/GOBP_RESPONSE_TO_ALCOHOL
GO_bp	GOBP_VITAMIN_METABOLIC_PROCESS	99	4	0.00143773	0.046049	UGT1A8:UGT1A4:UGT1A3:CYP3A4:CYP1A1	http://www.gsea-msigdb.org/gsea/msigdb/human/geneset/GOBP_VITAMIN_METABOLIC_PROCESS
GO_bp	GOBP_CELLULAR_RESPONSE_TO_BIOTIC_STIMULUS	250	6	0.00147076	0.0469129	MYD88:TLR2:TLR4:AKT1:NOD2:CCL2	http://www.gsea-msigdb.org/gsea/msigdb/human/geneset/GOBP_CELLULAR_RESPONSE_TO_BIOTIC_STIMULUS
GO_bp	GOBP_INTERLEUKIN_17_PRODUCTION	46	3	0.00149031	0.0473417	MYD88:TLR4:NOD2	http://www.gsea-msigdb.org/gsea/msigdb/human/geneset/GOBP_INTERLEUKIN_17_PRODUCTION
GO_bp	GOBP_GASTRO_INTESTINAL_SYSTEM_SMOOTH_MUSCLE_CONTRACTION	12	2	0.00151961	0.0476862	SULF1:SULF2	http://www.gsea-msigdb.org/gsea/msigdb/human/geneset/GOBP_GASTRO_INTESTINAL_SYSTEM_SMOOTH_MUSCLE_CONTRACTION
GO_bp	GOBP_RESPONSE_TO_PEPTIDOGLYCAN	12	2	0.00151961	0.0476862	MYD88:NOD2	http://www.gsea-msigdb.org/gsea/msigdb/human/geneset/GOBP_RESPONSE_TO_PEPTIDOGLYCAN
GO_bp	GOBP_NEGATIVE_REGULATION_OF_CELL_ADHESION_MEDIATED_BY_INTEGRIN	12	2	0.00151961	0.0476862	MUC1:CYP1B1	http://www.gsea-msigdb.org/gsea/msigdb/human/geneset/GOBP_NEGATIVE_REGULATION_OF_CELL_ADHESION_MEDIATED_BY_INTEGRIN
GO_bp	GOBP_NEGATIVE_REGULATION_OF_OXIDATIVE_STRESS_INDUCED_CELL_DEATH	47	3	0.00158627	0.0495774	NFE2L2:HIF1A:AKT1	http://www.gsea-msigdb.org/gsea/msigdb/human/geneset/GOBP_NEGATIVE_REGULATION_OF_OXIDATIVE_STRESS_INDUCED_CELL_DEATH
Wikipathways	WP_METAPATHWAY_BIOTRANSFORMATION_PHASE_I_AND_II	175	44	8.41739e-65	6.16995e-62	AKR7A2:FMO5:FMO3:FMO2:FMO1:FMO4:CYP1B1:SULT1C2:SULT1C4:UGT1A8:UGT1A10:UGT1A9:UGT1A7:UGT1A6:UGT1A5:UGT1A4:UGT1A3:UGT1A1:UGT2B17:UGT2B15:UGT2A3:UGT2B7:UGT2B11:UGT2B28:UGT2B4:UGT2A1:UGT2A2:UGT2A1:SULT1B1:SULT1E1:CYP3A5:CYP3A4:CYP3A43:CYP2C18:CYP2C19:CYP2C9:CYP2C8:CYP2E1:CYP1A1:CYP1A2:SULT1A2:SULT1A1:SULT2A1:SULT2B1:COMT:SULT4A1	http://www.gsea-msigdb.org/gsea/msigdb/human/geneset/WP_METAPATHWAY_BIOTRANSFORMATION_PHASE_I_AND_II
Wikipathways	WP_TAMOXIFEN_METABOLISM	19	18	1.28761e-41	4.71908e-39	FMO3:FMO1:CYP1B1:UGT1A10:UGT1A4:UGT2B15:UGT2B7:SULT1E1:CYP3A5:CYP3A4:CYP2C19:CYP2C9:CYP2C8:CYP2E1:CYP1A1:CYP1A2:SULT1A1:SULT2A1	http://www.gsea-msigdb.org/gsea/msigdb/human/geneset/WP_TAMOXIFEN_METABOLISM
Wikipathways	WP_GLUCURONIDATION	24	17	5.45284e-35	1.33231e-32	UGT1A8:UGT1A10:UGT1A9:UGT1A7:UGT1A6:UGT1A5:UGT1A4:UGT1A3:UGT1A1:UGT2B17:UGT2B15:UGT2A3:UGT2B7:UGT2B11:UGT2B28:UGT2B4:UGT2A1:UGT2A2:UGT2A1	http://www.gsea-msigdb.org/gsea/msigdb/human/geneset/WP_GLUCURONIDATION
Wikipathways	WP_NUCLEAR_RECEPTORS_METAPATHWAY	306	28	8.83719e-28	1.61942e-25	ARNT:CYP1B1:NFE2L2:UGT1A9:UGT1A7:UGT1A6:UGT1A4:UGT1A1:SLC2A2:ABCC5:UGT2B7:UGT2B4:AHR:ABCB1:CYP3A5:CYP3A4:CYP2C19:CYP2C9:ABCC2:CDKN1B:ABCC4:CYP1A1:CYP1A2:SULT1A1:CCL2:ABCC3:SULT2A1:SLC5A1	http://www.gsea-msigdb.org/gsea/msigdb/human/geneset/WP_NUCLEAR_RECEPTORS_METAPATHWAY
Wikipathways	WP_CODEINE_AND_MORPHINE_METABOLISM	12	11	2.88567e-25	4.23039e-23	UGT1A10:UGT1A9:UGT1A6:UGT1A1:UGT2B7:UGT2B4:ABCB1:CYP3A4:CYP2C8:ABCC2:ABCC3	http://www.gsea-msigdb.org/gsea/msigdb/human/geneset/WP_CODEINE_AND_MORPHINE_METABOLISM
Wikipathways	WP_ESTROGEN_METABOLISM_WP697	18	12	1.9447e-24	2.37578e-22	CYP1B1:UGT1A8:UGT1A9:UGT1A6:UGT1A3:UGT1A1:UGT2B7:SULT1E1:CYP3A4:CYP1A1:CYP1A2:SULT1A1:COMT	http://www.gsea-msigdb.org/gsea/msigdb/human/geneset/WP_ESTROGEN_METABOLISM_WP697
Wikipathways	WP_CONSTITUTIVE_ANDROSTANE_RECEPTOR_PATHWAY	30	13	5.28525e-23	5.53442e-21	UGT1A9:UGT1A6:UGT1A4:UGT1A1:ABCB1:CYP3A5:CYP3A4:CYP2C19:CYP2C9:ABCC2:SULT1A1:ABCC3:SULT2A1	http://www.gsea-msigdb.org/gsea/msigdb/human/geneset/WP_CONSTITUTIVE_ANDROSTANE_RECEPTOR_PATHWAY
Wikipathways	WP_ESTROGEN_METABOLISM_WP5276	22	12	6.66453e-23	6.10638e-21	CYP1B1:UGT1A10:UGT2B7:UGT2A2:SULT1E1:CYP3A5:CYP3A4:CYP2C19:CYP2C9:CYP2C8:CYP1A2:COMT	http://www.gsea-msigdb.org/gsea/msigdb/human/geneset/WP_ESTROGEN_METABOLISM_WP5276
Wikipathways	WP_PREGNANE_X_RECEPTOR_PATHWAY	31	13	9.06549e-23	7.38334e-21	UGT1A9:UGT1A6:UGT1A4:UGT1A1:ABCB1:CYP3A5:CYP3A4:CYP2C19:CYP2C9:ABCC2:ABCC4:ABCC3:SULT2A1	http://www.gsea-msigdb.org/gsea/msigdb/human/geneset/WP_PREGNANE_X_RECEPTOR_PATHWAY
Wikipathways	WP_ARYL_HYDROCARBON_RECEPTOR_PATHWAY_WP2873	45	12	2.69887e-18	1.97827e-16	ARNT:CYP1B1:NFE2L2:UGT1A9:UGT1A7:UGT1A6:UGT1A4:UGT1A1:AHR:CDKN1B:CYP1A1:CYP1A2	http://www.gsea-msigdb.org/gsea/msigdb/human/geneset/WP_ARYL_HYDROCARBON_RECEPTOR_PATHWAY_WP2873
Wikipathways	WP_SULFATION_BIOTRANSFORMATION_REACTION	16	9	1.32133e-17	8.80487e-16	SULT1C2:SULT1C4:SULT1B1:SULT1E1:SULT1A2:SULT1A1:SULT2A1:SULT2B1:SULT4A1	http://www.gsea-msigdb.org/gsea/msigdb/human/geneset/WP_SULFATION_BIOTRANSFORMATION_REACTION
Wikipathways	WP_IRINOTECAN_PATHWAY	11	8	4.24009e-17	2.58999e-15	UGT1A10:UGT1A9:UGT1A1:ABCG2:CYP3A5:CYP3A4:ABCC2:ABCC1	http://www.gsea-msigdb.org/gsea/msigdb/human/geneset/WP_IRINOTECAN_PATHWAY
Wikipathways	WP_OXIDATION_BY_CYTOCHROME_P450	58	11	4.53746e-15	2.55843e-13	CYP1B1:CYP3A5:CYP3A4:CYP3A43:CYP2C18:CYP2C19:CYP2C9:CYP2C8:CYP2E1:CYP1A1:CYP1A2	http://www.gsea-msigdb.org/gsea/msigdb/human/geneset/WP_OXIDATION_BY_CYTOCHROME_P450
Wikipathways	WP_NRF2_PATHWAY	135	13	1.26004e-13	6.39921e-12	NFE2L2:UGT1A9:UGT1A7:UGT1A6:UGT1A4:UGT1A1:SLC2A2:ABCC5:UGT2B7:ABCC2:ABCC4:ABCC3:SLC5A1	http://www.gsea-msigdb.org/gsea/msigdb/human/geneset/WP_NRF2_PATHWAY
Wikipathways	WP_PROXIMAL_TUBULE_TRANSPORT	55	10	1.30952e-13	6.39921e-12	SLC2A2:ABCG2:SLC22A7:ABCB1:ABCC2:SLC22A6:SLC22A8:SLC22A11:ABCC4:SLC5A1	http://www.gsea-msigdb.org/gsea/msigdb/human/geneset/WP_PROXIMAL_TUBULE_TRANSPORT
Wikipathways	WP_CATALYTIC_CYCLE_OF_MAMMALIAN_FLAVINCONTAINING_MONOOXYGENASES_FMOS	5	5	2.58613e-12	1.18477e-10	FMO5:FMO3:FMO2:FMO1:FMO4	http://www.gsea-msigdb.org/gsea/msigdb/human/geneset/WP_CATALYTIC_CYCLE_OF_MAMMALIAN_FLAVINCONTAINING_MONOOXYGENASES_FMOS
Wikipathways	WP_NUCLEAR_RECEPTORS_IN_LIPID_METABOLISM_AND_TOXICITY	34	8	4.24889e-12	1.83202e-10	ABCD3:ABCB1:CYP3A4:CYP2C9:ABCC2:CYP2E1:CYP1A2:ABCC3	http://www.gsea-msigdb.org/gsea/msigdb/human/geneset/WP_NUCLEAR_RECEPTORS_IN_LIPID_METABOLISM_AND_TOXICITY
Wikipathways	WP_ARYLAMINE_METABOLISM	6	5	1.54561e-11	6.29407e-10	UGT1A9:UGT1A4:CYP1A2:SULT1A2:SULT1A1	http://www.gsea-msigdb.org/gsea/msigdb/human/geneset/WP_ARYLAMINE_METABOLISM
Wikipathways	WP_DRUG_INDUCTION_OF_BILE_ACID_PATHWAY	17	6	1.4371e-10	5.54418e-09	ABCB1:CYP3A4:ABCC2:ABCC4:ABCC3:SULT2A1	http://www.gsea-msigdb.org/gsea/msigdb/human/geneset/WP_DRUG_INDUCTION_OF_BILE_ACID_PATHWAY
Wikipathways	WP_ARYL_HYDROCARBON_RECEPTOR_PATHWAY_WP2586	45	7	2.19636e-09	8.04967e-08	ARNT:CYP1B1:NFE2L2:AHR:CDKN1B:CYP1A1:CYP1A2	http://www.gsea-msigdb.org/gsea/msigdb/human/geneset/WP_ARYL_HYDROCARBON_RECEPTOR_PATHWAY_WP2586
Wikipathways	WP_PHOTODYNAMIC_THERAPYINDUCED_NFE2L2_NRF2_SURVIVAL_SIGNALING	21	5	4.94297e-08	1.72533e-06	NFE2L2:ABCG2:ABCC2:ABCC4:ABCC3	http://www.gsea-msigdb.org/gsea/msigdb/human/geneset/WP_PHOTODYNAMIC_THERAPYINDUCED_NFE2L2_NRF2_SURVIVAL_SIGNALING
Wikipathways	WP_VITAMIN_D_RECEPTOR_PATHWAY	178	9	2.39987e-07	7.99594e-06	SULT1C2:ABCB1:CYP3A5:CYP3A4:CYP2C9:CDKN1B:HIF1A:CYP1A1:SULT2A1	http://www.gsea-msigdb.org/gsea/msigdb/human/geneset/WP_VITAMIN_D_RECEPTOR_PATHWAY
Wikipathways	WP_CANNABINOID_RECEPTOR_SIGNALING	29	5	2.7958e-07	8.9101e-06	AHR:CYP3A4:CYP2C19:CYP2C9:CYP1A1	http://www.gsea-msigdb.org/gsea/msigdb/human/geneset/WP_CANNABINOID_RECEPTOR_SIGNALING
Wikipathways	WP_FATTY_ACID_OMEGAOXIDATION	13	4	3.77596e-07	1.15324e-05	CYP3A4:CYP2E1:CYP1A1:CYP1A2	http://www.gsea-msigdb.org/gsea/msigdb/human/geneset/WP_FATTY_ACID_OMEGAOXIDATION
Wikipathways	WP_FLUOROPYRIMIDINE_ACTIVITY	31	5	3.96899e-07	1.16371e-05	ABCC5:ABCG2:SLC22A7:ABCC4:ABCC3	http://www.gsea-msigdb.org/gsea/msigdb/human/geneset/WP_FLUOROPYRIMIDINE_ACTIVITY
Wikipathways	WP_MELATONIN_METABOLISM_AND_EFFECTS	34	5	6.42406e-07	1.81109e-05	CYP1B1:CYP2C19:CYP1A1:CYP1A2:SULT1A1	http://www.gsea-msigdb.org/gsea/msigdb/human/geneset/WP_MELATONIN_METABOLISM_AND_EFFECTS
Wikipathways	WP_BURN_WOUND_HEALING	105	7	8.64814e-07	2.34781e-05	TLR5:MYD88:TLR2:TLR4:AKT1:NOD2:CCL2	http://www.gsea-msigdb.org/gsea/msigdb/human/geneset/WP_BURN_WOUND_HEALING
Wikipathways	WP_PHOTODYNAMIC_THERAPYINDUCED_HIF1_SURVIVAL_SIGNALING	37	5	9.9462e-07	2.60377e-05	SLC16A1:ARNT:LDHA:HIF1A:PDHA1	http://www.gsea-msigdb.org/gsea/msigdb/human/geneset/WP_PHOTODYNAMIC_THERAPYINDUCED_HIF1_SURVIVAL_SIGNALING
Wikipathways	WP_MYD88_DISTINCT_INPUTOUTPUT_PATHWAY	17	4	1.23799e-06	3.12912e-05	TLR5:MYD88:TLR2:TLR4	http://www.gsea-msigdb.org/gsea/msigdb/human/geneset/WP_MYD88_DISTINCT_INPUTOUTPUT_PATHWAY
Wikipathways	WP_NICOTINE_METABOLISM_IN_LIVER_CELLS	6	3	2.26489e-06	5.53388e-05	FMO3:UGT1A9:UGT1A4	http://www.gsea-msigdb.org/gsea/msigdb/human/geneset/WP_NICOTINE_METABOLISM_IN_LIVER_CELLS
Wikipathways	WP_HEREDITARY_LEIOMYOMATOSIS_AND_RENAL_CELL_CARCINOMA_PATHWAY	20	4	2.49172e-06	5.89172e-05	NFE2L2:LDHA:HIF1A:PDHA1	http://www.gsea-msigdb.org/gsea/msigdb/human/geneset/WP_HEREDITARY_LEIOMYOMATOSIS_AND_RENAL_CELL_CARCINOMA_PATHWAY
Wikipathways	WP_AFLATOXIN_B1_METABOLISM	7	3	3.94937e-06	9.04653e-05	AKR7A2:CYP3A4:CYP1A2	http://www.gsea-msigdb.org/gsea/msigdb/human/geneset/WP_AFLATOXIN_B1_METABOLISM
Wikipathways	WP_BENZOAPYRENE_METABOLISM	8	3	6.29639e-06	0.000139856	CYP1B1:CYP3A4:CYP1A1	http://www.gsea-msigdb.org/gsea/msigdb/human/geneset/WP_BENZOAPYRENE_METABOLISM
Wikipathways	WP_TOLLLIKE_RECEPTOR_SIGNALING_RELATED_TO_MYD88	30	4	1.35708e-05	0.00029257	TLR5:MYD88:TLR2:TLR4	http://www.gsea-msigdb.org/gsea/msigdb/human/geneset/WP_TOLLLIKE_RECEPTOR_SIGNALING_RELATED_TO_MYD88
Wikipathways	WP_ESTROGEN_RECEPTOR_PATHWAY	13	3	3.15859e-05	0.000661498	CYP1B1:CYP1A1:CYP1A2	http://www.gsea-msigdb.org/gsea/msigdb/human/geneset/WP_ESTROGEN_RECEPTOR_PATHWAY
Wikipathways	WP_METABOLIC_REPROGRAMMING_IN_PANCREATIC_CANCER	42	4	5.29701e-05	0.00104938	SLC16A4:SLC16A1:LDHA:PDHA1	http://www.gsea-msigdb.org/gsea/msigdb/human/geneset/WP_METABOLIC_REPROGRAMMING_IN_PANCREATIC_CANCER
Wikipathways	WP_FIBRIN_COMPLEMENT_RECEPTOR_3_SIGNALING_PATHWAY	42	4	5.29701e-05	0.00104938	MYD88:TLR4:AKT1:CCL2	http://www.gsea-msigdb.org/gsea/msigdb/human/geneset/WP_FIBRIN_COMPLEMENT_RECEPTOR_3_SIGNALING_PATHWAY
Wikipathways	WP_INFLAMMATORY_BOWEL_DISEASE_SIGNALING	43	4	5.81829e-05	0.00110222	TLR5:TLR2:TLR4:NOD2	http://www.gsea-msigdb.org/gsea/msigdb/human/geneset/WP_INFLAMMATORY_BOWEL_DISEASE_SIGNALING
Wikipathways	WP_CLEAR_CELL_RENAL_CELL_CARCINOMA_PATHWAYS	84	5	5.86447e-05	0.00110222	ARNT:LDHA:LDHB:HIF1A:AKT1	http://www.gsea-msigdb.org/gsea/msigdb/human/geneset/WP_CLEAR_CELL_RENAL_CELL_CARCINOMA_PATHWAYS
Wikipathways	WP_2Q37_COPY_NUMBER_VARIATION_SYNDROME	141	6	6.94646e-05	0.0012464	UGT1A10:UGT1A9:UGT1A7:UGT1A6:UGT1A4:UGT1A1	http://www.gsea-msigdb.org/gsea/msigdb/human/geneset/WP_2Q37_COPY_NUMBER_VARIATION_SYNDROME
Wikipathways	WP_GLYCOLYSIS_AND_GLUCONEOGENESIS	45	4	6.97169e-05	0.0012464	SLC2A2:LDHA:LDHB:PDHA1	http://www.gsea-msigdb.org/gsea/msigdb/human/geneset/WP_GLYCOLYSIS_AND_GLUCONEOGENESIS
Wikipathways	WP_PLATELETMEDIATED_INTERACTIONS_WITH_VASCULAR_AND_CIRCULATING_CELLS	17	3	7.4032e-05	0.00129204	TLR2:TLR4:CCL2	http://www.gsea-msigdb.org/gsea/msigdb/human/geneset/WP_PLATELETMEDIATED_INTERACTIONS_WITH_VASCULAR_AND_CIRCULATING_CELLS
Wikipathways	WP_CHOLESTASIS	19	3	0.000104744	0.00170616	ABCC2:ABCC4:ABCC3	http://www.gsea-msigdb.org/gsea/msigdb/human/geneset/WP_CHOLESTASIS
Wikipathways	WP_FARNESOID_X_RECEPTOR_PATHWAY	19	3	0.000104744	0.00170616	UGT2B4:CYP3A4:SULT2A1	http://www.gsea-msigdb.org/gsea/msigdb/human/geneset/WP_FARNESOID_X_RECEPTOR_PATHWAY
Wikipathways	WP_LTF_DANGER_SIGNAL_RESPONSE_PATHWAY	19	3	0.000104744	0.00170616	MYD88:TLR2:TLR4	http://www.gsea-msigdb.org/gsea/msigdb/human/geneset/WP_LTF_DANGER_SIGNAL_RESPONSE_PATHWAY
Wikipathways	WP_IMATINIB_AND_CHRONIC_MYELOID_LEUKEMIA	20	3	0.000122788	0.00195661	ABCG2:ABCB1:CDKN1B	http://www.gsea-msigdb.org/gsea/msigdb/human/geneset/WP_IMATINIB_AND_CHRONIC_MYELOID_LEUKEMIA
Wikipathways	WP_TOLLLIKE_RECEPTOR_SIGNALING_PATHWAY	101	5	0.000140838	0.00217979	TLR5:MYD88:TLR2:TLR4:AKT1	http://www.gsea-msigdb.org/gsea/msigdb/human/geneset/WP_TOLLLIKE_RECEPTOR_SIGNALING_PATHWAY
Wikipathways	WP_FOXA2_PATHWAY	21	3	0.000142742	0.00217979	ABCC2:ABCC4:ABCC3	http://www.gsea-msigdb.org/gsea/msigdb/human/geneset/WP_FOXA2_PATHWAY
Wikipathways	WP_PI3KAKTMTOR_VITAMIN_D3_SIGNALING	22	3	0.000164691	0.00246364	LDHA:AKT1:PDHA1	http://www.gsea-msigdb.org/gsea/msigdb/human/geneset/WP_PI3KAKTMTOR_VITAMIN_D3_SIGNALING
Wikipathways	WP_LDL_INFLUENCE_ON_CD14_AND_TLR4	23	3	0.000188719	0.00276662	TLR4:AKT1:CCL2	http://www.gsea-msigdb.org/gsea/msigdb/human/geneset/WP_LDL_INFLUENCE_ON_CD14_AND_TLR4
Wikipathways	WP_ANGIOGENESIS	24	3	0.00021491	0.0030294	ARNT:HIF1A:AKT1	http://www.gsea-msigdb.org/gsea/msigdb/human/geneset/WP_ANGIOGENESIS
Wikipathways	WP_IL1_AND_MEGAKARYOCYTES_IN_OBESITY	24	3	0.00021491	0.0030294	MYD88:TLR2:CCL2	http://www.gsea-msigdb.org/gsea/msigdb/human/geneset/WP_IL1_AND_MEGAKARYOCYTES_IN_OBESITY
Wikipathways	WP_SULINDAC_METABOLIC_PATHWAY	5	2	0.000235472	0.00325663	CYP1B1:CYP1A2	http://www.gsea-msigdb.org/gsea/msigdb/human/geneset/WP_SULINDAC_METABOLIC_PATHWAY
Wikipathways	WP_ONCOSTATIN_M_SIGNALING_PATHWAY	65	4	0.000293796	0.00398801	CDKN1B:HIF1A:AKT1:CCL2	http://www.gsea-msigdb.org/gsea/msigdb/human/geneset/WP_ONCOSTATIN_M_SIGNALING_PATHWAY
Wikipathways	WP_TYPE_I_INTERFERON_INDUCTION_AND_SIGNALING_DURING_SARSCOV2_INFECTION	31	3	0.000465508	0.00620395	MYD88:TLR2:TLR4	http://www.gsea-msigdb.org/gsea/msigdb/human/geneset/WP_TYPE_I_INTERFERON_INDUCTION_AND_SIGNALING_DURING_SARSCOV2_INFECTION
Wikipathways	WP_NONGENOMIC_ACTIONS_OF_125_DIHYDROXYVITAMIN_D3	74	4	0.000482684	0.00631799	TLR2:TLR4:NOD2:CCL2	http://www.gsea-msigdb.org/gsea/msigdb/human/geneset/WP_NONGENOMIC_ACTIONS_OF_125_DIHYDROXYVITAMIN_D3
Wikipathways	WP_ARACHIDONATE_EPOXYGENASE_EPOXIDE_HYDROLASE	7	2	0.000491327	0.00631829	CYP2C9:CYP2C8	http://www.gsea-msigdb.org/gsea/msigdb/human/geneset/WP_ARACHIDONATE_EPOXYGENASE_EPOXIDE_HYDROLASE
Wikipathways	WP_OXIDATIVE_STRESS_RESPONSE	32	3	0.000511835	0.00646854	NFE2L2:UGT1A6:CYP1A1	http://www.gsea-msigdb.org/gsea/msigdb/human/geneset/WP_OXIDATIVE_STRESS_RESPONSE
Wikipathways	WP_MALE_INFERTILITY	134	5	0.000522264	0.00648846	NFE2L2:AHR:ABCB1:SLC16A7:CYP1A1	http://www.gsea-msigdb.org/gsea/msigdb/human/geneset/WP_MALE_INFERTILITY
Wikipathways	WP_GLUCOSE_METABOLISM_IN_TRIPLENEGATIVE_BREAST_CANCER_CELLS	8	2	0.000653004	0.00772019	SLC16A1:LDHA	http://www.gsea-msigdb.org/gsea/msigdb/human/geneset/WP_GLUCOSE_METABOLISM_IN_TRIPLENEGATIVE_BREAST_CANCER_CELLS
Wikipathways	WP_EICOSANOID_METABOLISM_VIA_CYTOCHROME_P450_MONOOXYGENASES_PATHWAY	8	2	0.000653004	0.00772019	CYP2C18:CYP2C8	http://www.gsea-msigdb.org/gsea/msigdb/human/geneset/WP_EICOSANOID_METABOLISM_VIA_CYTOCHROME_P450_MONOOXYGENASES_PATHWAY
Wikipathways	WP_HIF1A_AND_PPARG_REGULATION_OF_GLYCOLYSIS	8	2	0.000653004	0.00772019	LDHA:HIF1A	http://www.gsea-msigdb.org/gsea/msigdb/human/geneset/WP_HIF1A_AND_PPARG_REGULATION_OF_GLYCOLYSIS
Wikipathways	WP_ACUTE_VIRAL_MYOCARDITIS	85	4	0.00081501	0.00929452	TLR5:TLR4:AKT1:NOD2	http://www.gsea-msigdb.org/gsea/msigdb/human/geneset/WP_ACUTE_VIRAL_MYOCARDITIS
Wikipathways	WP_MINERALOCORTICOID_BIOSYNTHESIS	9	2	0.000836887	0.00929452	UGT1A10:UGT2B7	http://www.gsea-msigdb.org/gsea/msigdb/human/geneset/WP_MINERALOCORTICOID_BIOSYNTHESIS
Wikipathways	WP_ETHANOL_METABOLISM_PRODUCTION_OF_ROS_BY_CYP2E1	9	2	0.000836887	0.00929452	NFE2L2:CYP2E1	http://www.gsea-msigdb.org/gsea/msigdb/human/geneset/WP_ETHANOL_METABOLISM_PRODUCTION_OF_ROS_BY_CYP2E1
Wikipathways	WP_APOE_AND_MIR146_IN_INFLAMMATION_AND_ATHEROSCLEROSIS	9	2	0.000836887	0.00929452	TLR2:TLR4	http://www.gsea-msigdb.org/gsea/msigdb/human/geneset/WP_APOE_AND_MIR146_IN_INFLAMMATION_AND_ATHEROSCLEROSIS
Wikipathways	WP_LNCRNAMEDIATED_MECHANISMS_OF_THERAPEUTIC_RESISTANCE	10	2	0.00104276	0.0114081	ABCB1:HIF1A	http://www.gsea-msigdb.org/gsea/msigdb/human/geneset/WP_LNCRNAMEDIATED_MECHANISMS_OF_THERAPEUTIC_RESISTANCE
Wikipathways	WP_VITAMIN_A_AND_CAROTENOID_METABOLISM	41	3	0.00106533	0.0114836	CYP2E1:SULT1A1:SULT2B1	http://www.gsea-msigdb.org/gsea/msigdb/human/geneset/WP_VITAMIN_A_AND_CAROTENOID_METABOLISM
Wikipathways	WP_DISORDERS_OF_GALACTOSE_METABOLISM	13	2	0.00179016	0.0184815	SLC2A2:SLC5A1	http://www.gsea-msigdb.org/gsea/msigdb/human/geneset/WP_DISORDERS_OF_GALACTOSE_METABOLISM
Wikipathways	WP_KREBS_CYCLE_DISORDERS	13	2	0.00179016	0.0184815	LDHA:LDHB	http://www.gsea-msigdb.org/gsea/msigdb/human/geneset/WP_KREBS_CYCLE_DISORDERS
Wikipathways	WP_MODULATION_OF_PI3KAKTMTOR_SIGNALING_BY_BIOACTIVE_SPHINGOLIPIDS	13	2	0.00179016	0.0184815	HIF1A:AKT1	http://www.gsea-msigdb.org/gsea/msigdb/human/geneset/WP_MODULATION_OF_PI3KAKTMTOR_SIGNALING_BY_BIOACTIVE_SPHINGOLIPIDS
Wikipathways	WP_DISORDERS_OF_FRUCTOSE_METABOLISM	14	2	0.00208184	0.0211943	SLC2A2:SLC5A1	http://www.gsea-msigdb.org/gsea/msigdb/human/geneset/WP_DISORDERS_OF_FRUCTOSE_METABOLISM
Wikipathways	WP_IL1_SIGNALING_PATHWAY	52	3	0.00212393	0.0213266	MYD88:AKT1:CCL2	http://www.gsea-msigdb.org/gsea/msigdb/human/geneset/WP_IL1_SIGNALING_PATHWAY
Wikipathways	WP_CORI_CYCLE	17	2	0.00308161	0.0305246	SLC2A2:LDHA	http://www.gsea-msigdb.org/gsea/msigdb/human/geneset/WP_CORI_CYCLE
Wikipathways	WP_MAMMARY_GLAND_DEVELOPMENT_PATHWAY_EMBRYONIC_DEVELOPMENT_STAGE_1_OF_4	18	2	0.00345574	0.0333297	ITGA6:AKT1	http://www.gsea-msigdb.org/gsea/msigdb/human/geneset/WP_MAMMARY_GLAND_DEVELOPMENT_PATHWAY_EMBRYONIC_DEVELOPMENT_STAGE_1_OF_4
Wikipathways	WP_ULCERATIVE_COLITIS_SIGNALING	18	2	0.00345574	0.0333297	TLR2:NOD2	http://www.gsea-msigdb.org/gsea/msigdb/human/geneset/WP_ULCERATIVE_COLITIS_SIGNALING
Wikipathways	WP_LUNG_FIBROSIS	62	3	0.00350809	0.0333952	NFE2L2:MUC5B:CCL2	http://www.gsea-msigdb.org/gsea/msigdb/human/geneset/WP_LUNG_FIBROSIS
Wikipathways	WP_MEASLES_VIRUS_INFECTION	132	4	0.00407934	0.0383353	MYD88:TLR2:TLR4:CDKN1B	http://www.gsea-msigdb.org/gsea/msigdb/human/geneset/WP_MEASLES_VIRUS_INFECTION
Wikipathways	WP_NETWORK_MAP_OF_SARSCOV2_SIGNALING_PATHWAY	215	5	0.00418027	0.0383442	MYD88:AHR:HIF1A:AKT1:CCL2	http://www.gsea-msigdb.org/gsea/msigdb/human/geneset/WP_NETWORK_MAP_OF_SARSCOV2_SIGNALING_PATHWAY
Wikipathways	WP_AGERAGE_PATHWAY	66	3	0.0041849	0.0383442	MYD88:HIF1A:AKT1	http://www.gsea-msigdb.org/gsea/msigdb/human/geneset/WP_AGERAGE_PATHWAY
Wikipathways	WP_TYPE_II_DIABETES_MELLITUS	21	2	0.00469794	0.041995	SLC2A2:KCNJ11	http://www.gsea-msigdb.org/gsea/msigdb/human/geneset/WP_TYPE_II_DIABETES_MELLITUS
Wikipathways	WP_REGULATION_OF_APOPTOSIS_BY_PARATHYROID_HORMONERELATED_PROTEIN	21	2	0.00469794	0.041995	ITGA6:AKT1	http://www.gsea-msigdb.org/gsea/msigdb/human/geneset/WP_REGULATION_OF_APOPTOSIS_BY_PARATHYROID_HORMONERELATED_PROTEIN
Wikipathways	WP_PRIMARY_FOCAL_SEGMENTAL_GLOMERULOSCLEROSIS_FSGS	70	3	0.00493582	0.0435899	TLR4:CDKN1B:AKT1	http://www.gsea-msigdb.org/gsea/msigdb/human/geneset/WP_PRIMARY_FOCAL_SEGMENTAL_GLOMERULOSCLEROSIS_FSGS
Wikipathways	WP_KYNURENINE_PATHWAY_AND_LINKS_TO_CELL_SENESCENCE	22	2	0.00515127	0.0449509	AHR:TLR4	http://www.gsea-msigdb.org/gsea/msigdb/human/geneset/WP_KYNURENINE_PATHWAY_AND_LINKS_TO_CELL_SENESCENCE
Computational_gene_sets	MODULE_106	12	8	1.26686e-16	1.08697e-13	CYP1B1:CYP3A4:CYP2C18:CYP2C19:CYP2C9:CYP2C8:CYP2E1:CYP1A1	http://www.gsea-msigdb.org/gsea/msigdb/human/geneset/MODULE_106
Computational_gene_sets	MODULE_135	21	9	3.32631e-16	1.42699e-13	FMO3:FMO4:CYP1B1:CYP3A4:CYP2C18:CYP2C19:CYP2C8:CYP2E1:CYP1A1	http://www.gsea-msigdb.org/gsea/msigdb/human/geneset/MODULE_135
Computational_gene_sets	MODULE_93	175	12	6.46674e-11	1.84949e-08	AKR7A2:FMO5:FMO3:FMO4:CYP1B1:CYP3A5:CYP3A4:CYP2C19:CYP2C8:LDHA:CYP1A1:COMT	http://www.gsea-msigdb.org/gsea/msigdb/human/geneset/MODULE_93
Computational_gene_sets	MODULE_71	21	6	6.20132e-10	1.33018e-07	SLC16A4:SLC16A1:ABCC3:SLC16A5:SLC16A8:SLC16A2	http://www.gsea-msigdb.org/gsea/msigdb/human/geneset/MODULE_71
Computational_gene_sets	MODULE_212	311	13	4.45808e-09	7.65007e-07	ABCD3:FMO3:FMO4:UGT2B15:UGT2B7:SULT1E1:CYP3A4:CYP2C8:LDHA:CYP1A1:ABCC1:ABCC3:COMT	http://www.gsea-msigdb.org/gsea/msigdb/human/geneset/MODULE_212
Computational_gene_sets	MODULE_186	18	5	2.10583e-08	3.01133e-06	SLC16A4:SLC16A1:ABCC3:SLC16A8:SLC16A2	http://www.gsea-msigdb.org/gsea/msigdb/human/geneset/MODULE_186
Computational_gene_sets	MODULE_505	13	4	3.77596e-07	4.20979e-05	UGT2B15:UGT2B7:UGT2B4:SULT1E1	http://www.gsea-msigdb.org/gsea/msigdb/human/geneset/MODULE_505
Computational_gene_sets	MODULE_43	94	7	4.06552e-07	4.20979e-05	FMO3:FMO4:CYP3A4:CYP2C19:CYP2C8:LDHA:CYP1A1	http://www.gsea-msigdb.org/gsea/msigdb/human/geneset/MODULE_43
Computational_gene_sets	MODULE_23	542	14	4.41587e-07	4.20979e-05	FMO5:MUC1:FMO3:FMO4:UGT2B15:UGT2B7:UGT2B4:CYP3A4:CYP2C19:CYP2C9:CYP2C8:CYP2E1:CCL2:ABCC3	http://www.gsea-msigdb.org/gsea/msigdb/human/geneset/MODULE_23
Computational_gene_sets	MODULE_227	15	4	7.15423e-07	6.13833e-05	UGT1A6:UGT2B15:UGT2B7:UGT2B4	http://www.gsea-msigdb.org/gsea/msigdb/human/geneset/MODULE_227
Computational_gene_sets	CAR_HPX	70	6	1.23251e-06	9.61355e-05	FMO3:UGT2B11:CYP2C9:CYP2C8:CYP2E1:SULT2A1	http://www.gsea-msigdb.org/gsea/msigdb/human/geneset/CAR_HPX
Computational_gene_sets	MODULE_368	18	4	1.58568e-06	0.000113376	SLC16A4:SLC16A6:SLC16A8:SLC16A2	http://www.gsea-msigdb.org/gsea/msigdb/human/geneset/MODULE_368
Computational_gene_sets	MODULE_55	800	16	1.86693e-06	0.000122629	SLC16A4:FMO5:MUC1:FMO3:FMO4:ITGA6:UGT2B15:UGT2B7:UGT2B4:CYP2C19:CYP2C8:CYP2E1:MUC5B:SLC22A6:CCL2:ABCC3	http://www.gsea-msigdb.org/gsea/msigdb/human/geneset/MODULE_55
Computational_gene_sets	MODULE_218	19	4	2.00094e-06	0.000122629	SLC16A4:SLC16A7:SLC16A8:SLC16A2	http://www.gsea-msigdb.org/gsea/msigdb/human/geneset/MODULE_218
Computational_gene_sets	GNF2_IGF1	25	4	6.38379e-06	0.000365153	CYP2C9:CYP2C8:CYP2E1:CYP1A2	http://www.gsea-msigdb.org/gsea/msigdb/human/geneset/GNF2_IGF1
Computational_gene_sets	MODULE_88	802	15	8.98025e-06	0.000481566	SLC16A4:FMO5:MUC1:FMO3:FMO4:ITGA6:UGT2B15:UGT2B7:CYP2C19:CYP2C8:CYP2E1:MUC5B:SLC22A6:CCL2:ABCC3	http://www.gsea-msigdb.org/gsea/msigdb/human/geneset/MODULE_88
Computational_gene_sets	GNF2_HPN	124	6	3.38656e-05	0.00170922	UGT2B28:SLC22A7:CYP2C9:CYP2C8:CYP2E1:CYP1A2	http://www.gsea-msigdb.org/gsea/msigdb/human/geneset/GNF2_HPN
Computational_gene_sets	MODULE_117	697	13	3.81426e-05	0.00181813	SULT1C2:UGT1A4:SLC2A2:UGT2B17:UGT2B7:UGT2B4:UGT2A1:UGT2A1:SULT1B1:UGT8:CYP3A4:CYP2C8:CYP1A1:SLC16A2	http://www.gsea-msigdb.org/gsea/msigdb/human/geneset/MODULE_117
Computational_gene_sets	GNF2_CYP2B6	44	4	6.376e-05	0.00287927	CYP2C9:CYP2C8:CYP2E1:CYP1A2	http://www.gsea-msigdb.org/gsea/msigdb/human/geneset/GNF2_CYP2B6
Computational_gene_sets	MODULE_162	19	3	0.000104744	0.00430851	SLC16A4:SLC16A7:SLC16A2	http://www.gsea-msigdb.org/gsea/msigdb/human/geneset/MODULE_162
Computational_gene_sets	GNF2_TST	95	5	0.000105453	0.00430851	SLC22A7:CYP2C9:CYP2C8:CYP2E1:CYP1A2	http://www.gsea-msigdb.org/gsea/msigdb/human/geneset/GNF2_TST
Computational_gene_sets	CAR_IGFBP1	53	4	0.000132944	0.00518483	CYP3A4:CYP2C9:CYP2C8:SULT2A1	http://www.gsea-msigdb.org/gsea/msigdb/human/geneset/CAR_IGFBP1
Computational_gene_sets	GNF2_GSTM1	101	5	0.000140838	0.00525387	SLC22A7:CYP2C9:CYP2C8:CYP2E1:CYP1A2	http://www.gsea-msigdb.org/gsea/msigdb/human/geneset/GNF2_GSTM1
Computational_gene_sets	GNF2_CEBPA	59	4	0.000202011	0.00722188	CYP2C9:CYP2C8:CYP2E1:CYP1A2	http://www.gsea-msigdb.org/gsea/msigdb/human/geneset/GNF2_CEBPA
Computational_gene_sets	MORF_CASP10	111	5	0.000219201	0.00752298	CYP2E1:SLC22A6:SLC16A5:SULT2B1:SULT4A1	http://www.gsea-msigdb.org/gsea/msigdb/human/geneset/MORF_CASP10
Computational_gene_sets	GNF2_LCAT	116	5	0.000269042	0.00887838	SLC22A7:CYP2C9:CYP2C8:CYP2E1:CYP1A2	http://www.gsea-msigdb.org/gsea/msigdb/human/geneset/GNF2_LCAT
Computational_gene_sets	GNF2_HPX	127	5	0.000408639	0.0129857	SLC22A7:CYP2C9:CYP2C8:CYP2E1:CYP1A2	http://www.gsea-msigdb.org/gsea/msigdb/human/geneset/GNF2_HPX
Computational_gene_sets	GNF2_CD14	34	3	0.000613118	0.0187877	TLR2:SULT1A1:NOD2	http://www.gsea-msigdb.org/gsea/msigdb/human/geneset/GNF2_CD14
Computational_gene_sets	MODULE_247	35	3	0.000668213	0.0197699	FMO4:SULT1C2:UGT2B15	http://www.gsea-msigdb.org/gsea/msigdb/human/geneset/MODULE_247
Computational_gene_sets	MORF_ERCC4	303	7	0.00074449	0.0212924	ABCB1:CYP2C19:CYP2E1:SLC22A6:SLC16A5:SULT2B1:SULT4A1	http://www.gsea-msigdb.org/gsea/msigdb/human/geneset/MORF_ERCC4
Computational_gene_sets	MORF_NF1	161	5	0.00119306	0.0328803	CYP2E1:SLC22A6:SLC16A5:SULT2B1:SULT4A1	http://www.gsea-msigdb.org/gsea/msigdb/human/geneset/MORF_NF1
Computational_gene_sets	MORF_ESR1	162	5	0.00122631	0.0328803	CYP2E1:SLC22A6:SLC16A5:SULT2B1:SULT4A1	http://www.gsea-msigdb.org/gsea/msigdb/human/geneset/MORF_ESR1
Computational_gene_sets	MORF_PPP2R5B	164	5	0.00129485	0.0336661	CYP2E1:SLC22A6:SLC16A5:SULT2B1:SULT4A1	http://www.gsea-msigdb.org/gsea/msigdb/human/geneset/MORF_PPP2R5B
Computational_gene_sets	MORF_BRCA1	250	6	0.00147076	0.0371149	CYP2E1:SLC22A6:SLC16A5:SULT2B1:SULT4A1:PDK3	http://www.gsea-msigdb.org/gsea/msigdb/human/geneset/MORF_BRCA1
Computational_gene_sets	MORF_TNFRSF25	254	6	0.00159396	0.0390748	ARNT:UGT2B15:CYP2E1:SLC22A6:SLC16A5:SULT4A1	http://www.gsea-msigdb.org/gsea/msigdb/human/geneset/MORF_TNFRSF25
Computational_gene_sets	MORF_PRKACA	105	4	0.00178516	0.0425462	CYP2E1:SLC22A6:SLC16A5:SULT2B1	http://www.gsea-msigdb.org/gsea/msigdb/human/geneset/MORF_PRKACA
Computational_gene_sets	MORF_BNIP1	182	5	0.0020457	0.0474381	CYP2E1:SLC22A6:SLC16A5:SULT2B1:SULT4A1	http://www.gsea-msigdb.org/gsea/msigdb/human/geneset/MORF_BNIP1
GO_cc	GOCC_GOLGI_LUMEN	97	16	2.19035e-20	2.21007e-17	MUC1:MUC13:ABCC5:MUC20:MUC4:MUC7:MUC21:MUC12:MUC17:RN7SKP54:MUC6:MUC2:MUC5AC:MUC5B:MUC15:MUC19:MUC16	http://www.gsea-msigdb.org/gsea/msigdb/human/geneset/GOCC_GOLGI_LUMEN
GO_cc	GOCC_NUCLEAR_OUTER_MEMBRANE_ENDOPLASMIC_RETICULUM_MEMBRANE_NETWORK	1131	32	3.10754e-16	1.56775e-13	FMO5:FMO3:FMO2:FMO1:FMO4:CYP1B1:UGT1A8:UGT1A10:UGT1A9:UGT1A7:UGT1A6:UGT1A5:UGT1A4:UGT1A3:UGT1A1:UGT2B17:UGT2B15:UGT2B7:UGT2B11:UGT2B28:UGT2B4:UGT2A1:UGT2A2:UGT2A1:CYP3A5:CYP3A4:CYP3A43:CYP2C18:CYP2C19:CYP2C9:CYP2C8:CYP2E1:CYP1A1:CYP1A2	http://www.gsea-msigdb.org/gsea/msigdb/human/geneset/GOCC_NUCLEAR_OUTER_MEMBRANE_ENDOPLASMIC_RETICULUM_MEMBRANE_NETWORK
GO_cc	GOCC_APICAL_PART_OF_CELL	435	21	2.91849e-15	9.15785e-13	SLC16A1:MUC1:LCT:SLC22A13:MUC13:SLC2A2:ABCC5:MUC20:ABCG2:SLC22A5:ABCB1:MUC17:RN7SKP54:ABCC2:SLC22A8:SLC22A11:SLC22A12:ABCC4:ABCC1:SLC5A1:SLC16A8:SLC16A2	http://www.gsea-msigdb.org/gsea/msigdb/human/geneset/GOCC_APICAL_PART_OF_CELL
GO_cc	GOCC_ORGANELLE_SUBCOMPARTMENT	1413	34	3.63047e-15	9.15785e-13	FMO5:FMO3:FMO2:FMO1:FMO4:CYP1B1:UGT1A8:UGT1A10:UGT1A9:UGT1A7:UGT1A6:UGT1A5:UGT1A4:UGT1A3:UGT1A1:UGT2B17:UGT2B15:UGT2B7:UGT2B11:UGT2B28:UGT2B4:UGT2A1:UGT2A2:UGT2A1:CYP3A5:CYP3A4:CYP3A43:SULF1:CYP2C18:CYP2C19:CYP2C9:CYP2C8:CYP2E1:CYP1A1:CYP1A2:SULF2	http://www.gsea-msigdb.org/gsea/msigdb/human/geneset/GOCC_ORGANELLE_SUBCOMPARTMENT
GO_cc	GOCC_BASAL_PART_OF_CELL	274	15	5.98354e-12	1.20748e-09	SLC16A1:ABCC5:MUC20:SLC22A5:SLC22A7:SLC22A6:SLC22A8:SLC22A9:SLC22A11:SLC16A7:ABCC4:ABCC1:NOD2:ABCC3:SLC16A8	http://www.gsea-msigdb.org/gsea/msigdb/human/geneset/GOCC_BASAL_PART_OF_CELL
GO_cc	GOCC_PLASMA_MEMBRANE_REGION	1243	27	4.5716e-11	7.68791e-09	SLC16A1:MUC1:LCT:SLC22A13:MUC13:SLC2A2:ABCC5:MUC20:ABCG2:SLC22A5:SLC22A7:ABCB1:MUC17:RN7SKP54:ABCC2:SLC22A6:SLC22A8:SLC22A9:SLC22A11:SLC22A12:SLC16A7:ABCC4:ABCC1:NOD2:ABCC3:SLC5A1:SLC16A8:SLC16A2	http://www.gsea-msigdb.org/gsea/msigdb/human/geneset/GOCC_PLASMA_MEMBRANE_REGION
GO_cc	GOCC_BASOLATERAL_PLASMA_MEMBRANE	224	13	8.06901e-11	1.16309e-08	SLC16A1:ABCC5:MUC20:SLC22A7:SLC22A6:SLC22A8:SLC22A9:SLC16A7:ABCC4:ABCC1:NOD2:ABCC3:SLC16A8	http://www.gsea-msigdb.org/gsea/msigdb/human/geneset/GOCC_BASOLATERAL_PLASMA_MEMBRANE
GO_cc	GOCC_EXTERNAL_SIDE_OF_APICAL_PLASMA_MEMBRANE	6	4	8.13462e-09	1.02598e-06	LCT:ABCG2:ABCB1:ABCC4	http://www.gsea-msigdb.org/gsea/msigdb/human/geneset/GOCC_EXTERNAL_SIDE_OF_APICAL_PLASMA_MEMBRANE
GO_cc	GOCC_GOLGI_APPARATUS	1579	26	3.66467e-08	4.1085e-06	AKR7A2:MUC1:NFE2L2:SLC22A13:MUC13:ABCC5:MUC20:MUC4:MUC7:TLR2:MUC21:MUC12:MUC17:RN7SKP54:SULF1:TLR4:CYP2E1:MUC6:MUC2:MUC5AC:MUC5B:MUC15:MUC19:ABCC4:NOD2:MUC16:SULF2	http://www.gsea-msigdb.org/gsea/msigdb/human/geneset/GOCC_GOLGI_APPARATUS
GO_cc	GOCC_BRUSH_BORDER_MEMBRANE	55	4	0.000153678	0.0141671	ABCG2:SLC22A5:SLC22A12:SLC5A1	http://www.gsea-msigdb.org/gsea/msigdb/human/geneset/GOCC_BRUSH_BORDER_MEMBRANE
GO_cc	GOCC_BRUSH_BORDER	103	5	0.000154449	0.0141671	SLC2A2:ABCG2:SLC22A5:SLC22A12:SLC5A1	http://www.gsea-msigdb.org/gsea/msigdb/human/geneset/GOCC_BRUSH_BORDER
GO_cc	GOCC_CELL_SURFACE	836	13	0.00023382	0.0196604	LCT:ITGA6:ABCG2:TLR2:ABCB1:MUC17:RN7SKP54:SULF1:TLR4:ABCC2:SLC22A11:ABCC4:NOD2:SULF2	http://www.gsea-msigdb.org/gsea/msigdb/human/geneset/GOCC_CELL_SURFACE
GO_cc	GOCC_EXTERNAL_SIDE_OF_PLASMA_MEMBRANE	341	8	0.000281253	0.0218295	LCT:ITGA6:ABCG2:ABCB1:MUC17:RN7SKP54:TLR4:SLC22A11:ABCC4	http://www.gsea-msigdb.org/gsea/msigdb/human/geneset/GOCC_EXTERNAL_SIDE_OF_PLASMA_MEMBRANE
GO_cc	GOCC_ARYL_HYDROCARBON_RECEPTOR_COMPLEX	8	2	0.000653004	0.0470629	ARNT:AHR	http://www.gsea-msigdb.org/gsea/msigdb/human/geneset/GOCC_ARYL_HYDROCARBON_RECEPTOR_COMPLEX
Hallmark_gene_sets	HALLMARK_XENOBIOTIC_METABOLISM	196	9	5.40942e-07	2.70471e-05	FMO3:FMO1:CYP2C18:ABCC2:CYP2E1:CYP1A1:CYP1A2:ABCC3:COMT	http://www.gsea-msigdb.org/gsea/msigdb/human/geneset/HALLMARK_XENOBIOTIC_METABOLISM
Hallmark_gene_sets	HALLMARK_PEROXISOME	99	5	0.000128165	0.00320413	ABCD3:ABCC5:UGT2B17:ABCB1:SULT2B1	http://www.gsea-msigdb.org/gsea/msigdb/human/geneset/HALLMARK_PEROXISOME
Hallmark_gene_sets	HALLMARK_FATTY_ACID_METABOLISM	155	5	0.0010074	0.01679	FMO1:SLC22A5:LDHA:CYP1A1:PDHA1	http://www.gsea-msigdb.org/gsea/msigdb/human/geneset/HALLMARK_FATTY_ACID_METABOLISM
Hallmark_gene_sets	HALLMARK_INFLAMMATORY_RESPONSE	200	5	0.0030739	0.0384237	TLR2:AHR:HIF1A:NOD2:CCL2	http://www.gsea-msigdb.org/gsea/msigdb/human/geneset/HALLMARK_INFLAMMATORY_RESPONSE
Oncogenic_signatures	NFE2L2.V2	424	13	1.69197e-07	3.19782e-05	NFE2L2:UGT1A8:UGT1A10:UGT1A9:UGT1A7:UGT1A6:UGT1A5:UGT1A4:UGT1A3:UGT1A1:SULT1E1:TLR4:ABCC2:MUC5AC	http://www.gsea-msigdb.org/gsea/msigdb/human/geneset/NFE2L2.V2
Oncogenic_signatures	KRAS.600_UP.V1_DN	267	7	0.00035138	0.0332054	UGT2B17:UGT2A3:ABCB1:CYP2C18:CYP2C19:MUC5AC:SLC22A11	http://www.gsea-msigdb.org/gsea/msigdb/human/geneset/KRAS.600_UP.V1_DN
GWAScatalog	Serum metabolite levels	333	27	2.26122e-25	1.00059e-21	FMO3:UGT1A8:UGT1A10:UGT1A9:UGT1A7:UGT1A6:UGT1A5:UGT1A4:UGT1A3:UGT1A1:GBA3:UGT2B17:UGT2B15:ABCG2:SLC22A5:CYP3A5:CYP3A43:CYP2C18:CYP2C19:CYP2C9:CYP2C8:ABCC2:LDHA:SLC22A8:ABCC4:ABCC1:SULT2A1:COMT
GWAScatalog	Plasma clozapine-norclozapine ratio in treatment-resistant schizophrenia	14	10	5.2994e-21	1.17249e-17	UGT2B15:UGT2A3:UGT2B7:UGT2B11:UGT2B28:UGT2B4:CYP2C18:CYP2C19:CYP2C9:CYP2C8
GWAScatalog	Total bilirubin levels in HIV-1 infection	10	8	1.1611e-17	1.71263e-14	UGT1A8:UGT1A10:UGT1A9:UGT1A7:UGT1A6:UGT1A5:UGT1A4:UGT1A3:UGT1A1
GWAScatalog	Liver disease biomarker	7	7	5.643e-17	6.24257e-14	UGT1A8:UGT1A10:UGT1A9:UGT1A7:UGT1A6:UGT1A5:UGT1A4:UGT1A3
GWAScatalog	Total bilirubin levels	17	8	6.09639e-15	5.39531e-12	UGT1A8:UGT1A10:UGT1A9:UGT1A7:UGT1A6:UGT1A5:UGT1A4:UGT1A3:UGT1A1
GWAScatalog	Bilirubin levels	26	8	3.77696e-13	2.78551e-10	UGT1A8:UGT1A10:UGT1A9:UGT1A7:UGT1A6:UGT1A5:UGT1A4:UGT1A3:UGT1A1
GWAScatalog	Urinary metabolite levels in chronic kidney disease	92	11	9.32237e-13	5.66999e-10	AKR7A2:FMO4:LCT:GBA3:UGT2B15:UGT2B7:CYP3A5:CYP2C8:SLC22A10:SULT2A1:COMT
GWAScatalog	Hair greying	29	8	1.02508e-12	5.66999e-10	UGT1A8:UGT1A10:UGT1A9:UGT1A7:UGT1A6:UGT1A5:UGT1A4:UGT1A3:UGT1A1
GWAScatalog	N-desmethylclozapine concentration in schizophrenia	5	5	2.58613e-12	1.27151e-09	UGT1A10:UGT1A9:UGT1A7:UGT1A6:UGT1A5
GWAScatalog	Response to clopidogrel therapy	4	4	5.46438e-10	2.41799e-07	CYP2C18:CYP2C19:CYP2C9:CYP2C8
GWAScatalog	Warfarin maintenance dose	7	4	1.89089e-08	7.60655e-06	CYP2C18:CYP2C19:CYP2C9:CYP2C8
GWAScatalog	Serum metabolite concentrations in chronic kidney disease	72	7	6.39375e-08	2.3577e-05	UGT1A8:UGT1A10:UGT1A9:UGT1A7:UGT1A6:UGT1A5:UGT1A4:UGT1A3
GWAScatalog	Low density lipoprotein cholesterol levels	234	10	2.40389e-07	8.18249e-05	UGT1A8:UGT1A10:UGT1A9:UGT1A7:UGT1A6:UGT1A5:UGT1A4:UGT1A3:UGT1A1:SLC22A5:CYP2C8
GWAScatalog	Neuroblastoma or malignant cutaneous melanoma	17	4	1.23799e-06	0.000391293	UGT1A10:UGT1A9:UGT1A7:UGT1A6
GWAScatalog	Gout	79	6	2.52093e-06	0.000743674	MUC1:ABCG2:CYP2C8:CYP2E1:SLC22A11:SLC22A12
GWAScatalog	Clopidogrel active metabolite levels	7	3	3.94937e-06	0.00109225	CYP2C18:CYP2C19:CYP2C9
GWAScatalog	Urinary metabolite modules (eigenmetabolites) in chronic kidney disease	24	4	5.38271e-06	0.00140109	AKR7A2:GBA3:CYP3A5:COMT
GWAScatalog	Ticagrelor levels in individuals with acute coronary syndromes treated with ticagrelor	8	3	6.29639e-06	0.00154786	CYP3A5:CYP3A4:CYP3A43
GWAScatalog	Sex hormone levels	9	3	9.41081e-06	0.00219173	CYP3A4:SLC22A9:SULT2A1
GWAScatalog	Coffee consumption (cups per day)	29	4	1.18059e-05	0.00261205	ABCG2:AHR:CYP1A1:CYP1A2
GWAScatalog	Dehydroepiandrosterone sulphate levels	10	3	1.33959e-05	0.00282272	CYP3A43:CYP2C9:SULT2A1
GWAScatalog	Cholelithiasis-related traits in sickle cell anemia	2	2	2.37754e-05	0.00449579	UGT1A10:UGT1A1
GWAScatalog	Plasma clozapine levels in treatment-resistant schizophrenia	2	2	2.37754e-05	0.00449579	CYP1A1:CYP1A2
GWAScatalog	Caffeine consumption	12	3	2.43839e-05	0.00449579	AHR:CYP1A1:CYP1A2
GWAScatalog	Serum uric acid levels	135	6	5.45354e-05	0.00942338	MUC1:ABCG2:SLC22A8:SLC22A10:SLC22A11:SLC22A12
GWAScatalog	Asthma (adult onset)	83	5	5.5369e-05	0.00942338	SLC22A5:MUC6:MUC2:MUC5AC:MUC5B
GWAScatalog	Coffee consumption	97	5	0.000116385	0.0190742	ABCG2:AHR:CYP2E1:CYP1A1:CYP1A2
GWAScatalog	Renal underexcretion gout	20	3	0.000122788	0.019405	ABCG2:SLC22A11:SLC22A12
GWAScatalog	Acenocoumarol maintenance dosage	4	2	0.000141738	0.0209064	CYP2C18:CYP2C19
GWAScatalog	Renal function-related traits (urea)	4	2	0.000141738	0.0209064	ABCG2:SLC22A12
GWAScatalog	Uric acid levels	22	3	0.000164691	0.0235083	ABCG2:SLC22A11:SLC22A12
GWAScatalog	Urinary albumin-to-creatinine ratio	108	5	0.000192881	0.0266177	MUC1:SULT1C4:AHR:CYP1A1:CYP1A2
GWAScatalog	Urate levels	243	7	0.000198505	0.0266177	ARNT:ABCG2:SLC22A7:SLC22A6:SLC22A11:SLC22A12:CYP1A1
GWAScatalog	Bitter beverage consumption	24	3	0.00021491	0.0269435	ABCG2:AHR:CYP1A1
GWAScatalog	Tea consumption	60	4	0.000215626	0.0269435	ARNT:ABCG2:AHR:CYP1A1
GWAScatalog	Mean arterial pressure	111	5	0.000219201	0.0269435	SLC22A7:CYP2C19:KCNJ11:CDKN1B:CYP1A2
GWAScatalog	Urinary albumin excretion	63	4	0.000260437	0.0311469	FMO4:AHR:CYP1A1:CYP1A2
GWAScatalog	Gout vs asymptomatic hyperuricemia	6	2	0.000352076	0.0379985	ABCG2:SLC22A11
GWAScatalog	Sweet beverage consumption	6	2	0.000352076	0.0379985	AHR:CYP1A1
GWAScatalog	Caffeine metabolism (plasma 1	6	2	0.000352076	0.0379985	AHR:CYP1A1
GWAScatalog	Tacrolimus trough concentration in kidney transplant patients	6	2	0.000352076	0.0379985	CYP3A4:CYP3A43
GWAScatalog	Urate levels in lean individuals	29	3	0.000381122	0.0401539	ABCG2:SLC22A11:SLC22A12
Positional_gene_sets	chr4q13	85	13	2.60747e-16	7.8224e-14	UGT2B17:UGT2B15:UGT2B10:UGT2A3:UGT2B7:UGT2B11:UGT2B28:UGT2B4:UGT2A1:UGT2A2:UGT2A1:SULT1B1:SULT1E1:MUC7	http://www.gsea-msigdb.org/gsea/msigdb/human/geneset/chr4q13
Positional_gene_sets	chr2q37	148	8	6.93464e-07	0.00010402	UGT1A8:UGT1A10:UGT1A9:UGT1A7:UGT1A6:UGT1A5:UGT1A4:UGT1A3:UGT1A1	http://www.gsea-msigdb.org/gsea/msigdb/human/geneset/chr2q37
Positional_gene_sets	chr7q22	145	6	8.11103e-05	0.00811103	CYP3A5:CYP3A7:CYP3A4:CYP3A43:MUC12:MUC17:RN7SKP54	http://www.gsea-msigdb.org/gsea/msigdb/human/geneset/chr7q22
Positional_gene_sets	chr1q24	77	4	0.00056133	0.0420998	FMO3:FMO2:FMO1:FMO4	http://www.gsea-msigdb.org/gsea/msigdb/human/geneset/chr1q24
BioCarta	BIOCARTA_NUCLEARRS_PATHWAY	33	8	3.2624e-12	9.5262e-10	ABCD3:ABCB1:CYP3A4:CYP2C9:ABCC2:CYP2E1:CYP1A2:ABCC3	http://www.gsea-msigdb.org/gsea/msigdb/human/geneset/BIOCARTA_NUCLEARRS_PATHWAY
BioCarta	BIOCARTA_MRP_PATHWAY	6	3	2.26489e-06	0.000330674	ABCB1:ABCC1:ABCC3	http://www.gsea-msigdb.org/gsea/msigdb/human/geneset/BIOCARTA_MRP_PATHWAY
BioCarta	BIOCARTA_HIF_PATHWAY	15	3	4.98918e-05	0.00485614	ARNT:LDHA:HIF1A	http://www.gsea-msigdb.org/gsea/msigdb/human/geneset/BIOCARTA_HIF_PATHWAY
BioCarta	BIOCARTA_P53HYPOXIA_PATHWAY	20	3	0.000122788	0.00896355	ABCB1:HIF1A:AKT1	http://www.gsea-msigdb.org/gsea/msigdb/human/geneset/BIOCARTA_P53HYPOXIA_PATHWAY
BioCarta	BIOCARTA_ACETAMINOPHEN_PATHWAY	5	2	0.000235472	0.0137516	CYP2E1:CYP1A2	http://www.gsea-msigdb.org/gsea/msigdb/human/geneset/BIOCARTA_ACETAMINOPHEN_PATHWAY
Immunologic_signatures	SOBOLEV_PBMC_PANDEMRIX_AGE_18_64YO_1DY_UP	18	4	1.58568e-06	0.00331143	MYD88:TLR2:TLR4:NOD2	http://www.gsea-msigdb.org/gsea/msigdb/human/geneset/SOBOLEV_PBMC_PANDEMRIX_AGE_18_64YO_1DY_UP
Immunologic_signatures	FULLER_PBMC_F_TULARENSIS_VACCINE_LVS_AGE_22_54YO_192HR_UP	41	5	1.68344e-06	0.00331143	TLR5:MYD88:TLR2:TLR4:NOD2	http://www.gsea-msigdb.org/gsea/msigdb/human/geneset/FULLER_PBMC_F_TULARENSIS_VACCINE_LVS_AGE_22_54YO_192HR_UP
Immunologic_signatures	FULLER_PBMC_F_TULARENSIS_VACCINE_LVS_AGE_22_54YO_336HR_UP	42	5	1.90349e-06	0.00331143	TLR5:MYD88:TLR2:TLR4:NOD2	http://www.gsea-msigdb.org/gsea/msigdb/human/geneset/FULLER_PBMC_F_TULARENSIS_VACCINE_LVS_AGE_22_54YO_336HR_UP
Immunologic_signatures	FULLER_PBMC_F_TULARENSIS_VACCINE_LVS_AGE_22_54YO_18HR_UP	53	5	6.15136e-06	0.00802599	TLR5:MYD88:TLR2:TLR4:NOD2	http://www.gsea-msigdb.org/gsea/msigdb/human/geneset/FULLER_PBMC_F_TULARENSIS_VACCINE_LVS_AGE_22_54YO_18HR_UP
Immunologic_signatures	FULLER_PBMC_F_TULARENSIS_VACCINE_LVS_AGE_22_54YO_48HR_UP	57	5	8.83635e-06	0.00922338	TLR5:MYD88:TLR2:TLR4:NOD2	http://www.gsea-msigdb.org/gsea/msigdb/human/geneset/FULLER_PBMC_F_TULARENSIS_VACCINE_LVS_AGE_22_54YO_48HR_UP
Immunologic_signatures	GSE10325_BCELL_VS_MYELOID_DN	195	7	5.04652e-05	0.0438963	TLR5:CYP1B1:MYD88:TLR2:SULT1A1:NOD2:PDK3	http://www.gsea-msigdb.org/gsea/msigdb/human/geneset/GSE10325_BCELL_VS_MYELOID_DN
Cell_type_signature	BUSSLINGER_DUODENAL_LATE_IMMATURE_ENTEROCYTES	174	17	1.33504e-17	1.10808e-14	LCT:MUC13:SLC2A2:GBA3:UGT2B17:UGT2A3:UGT2B7:ABCG2:CYP3A5:CYP3A4:CYP2C18:CYP2C9:LDHA:CYP1A1:SULT1A1:SULT2A1:SLC5A1	http://www.gsea-msigdb.org/gsea/msigdb/human/geneset/BUSSLINGER_DUODENAL_LATE_IMMATURE_ENTEROCYTES
Cell_type_signature	DESCARTES_FETAL_INTESTINE_INTESTINAL_EPITHELIAL_CELLS	250	18	3.29652e-16	1.36806e-13	FMO1:SULT1C2:LCT:MUC13:SLC2A2:UGT2B17:UGT2A3:SULT1B1:SULT1E1:CYP3A5:MUC17:RN7SKP54:CYP2C18:CYP2C19:CYP2C9:ABCC2:MUC2:SULT2A1:SLC5A1	http://www.gsea-msigdb.org/gsea/msigdb/human/geneset/DESCARTES_FETAL_INTESTINE_INTESTINAL_EPITHELIAL_CELLS
Cell_type_signature	AIZARANI_LIVER_C11_HEPATOCYTES_1	288	15	1.21722e-11	3.36763e-09	FMO5:FMO3:SLC2A2:GBA3:UGT2B15:UGT2B7:UGT2B4:CYP3A5:CYP3A4:CYP2C19:CYP2C9:CYP2C8:CYP2E1:CYP1A2:SULT2A1	http://www.gsea-msigdb.org/gsea/msigdb/human/geneset/AIZARANI_LIVER_C11_HEPATOCYTES_1
Cell_type_signature	BUSSLINGER_DUODENAL_MATURE_ENTEROCYTES	254	14	2.89109e-11	5.99901e-09	LCT:MUC13:UGT2B7:ABCG2:CYP3A5:CYP3A4:MUC17:RN7SKP54:CYP2C18:CYP2C9:ABCC2:CYP1A1:SULT1A2:ABCC3:SLC5A1	http://www.gsea-msigdb.org/gsea/msigdb/human/geneset/BUSSLINGER_DUODENAL_MATURE_ENTEROCYTES
Cell_type_signature	DESCARTES_FETAL_LIVER_HEPATOBLASTS	446	17	6.5827e-11	1.09273e-08	FMO5:FMO3:SULT1C2:SLC2A2:GBA3:UGT2B15:UGT2B10:UGT2A3:UGT2B7:UGT2B4:SULT1E1:SLC22A7:CYP3A5:CYP3A43:ABCC2:SLC22A10:SLC22A9	http://www.gsea-msigdb.org/gsea/msigdb/human/geneset/DESCARTES_FETAL_LIVER_HEPATOBLASTS
Cell_type_signature	AIZARANI_LIVER_C17_HEPATOCYTES_3	99	8	3.07596e-08	4.25508e-06	UGT2B7:CYP3A4:CYP2C19:CYP2C9:CYP2C8:CYP2E1:CYP1A2:SULT2A1	http://www.gsea-msigdb.org/gsea/msigdb/human/geneset/AIZARANI_LIVER_C17_HEPATOCYTES_3
Cell_type_signature	MURARO_PANCREAS_DUCTAL_CELL	1233	21	5.43022e-07	6.43869e-05	MUC1:CYP1B1:SULT1C2:ITGA6:NFE2L2:MYD88:MUC13:MUC20:UGT2B15:UGT2A3:AHR:ABCB1:CYP3A5:LDHA:SLC16A7:ABCC4:HIF1A:CYP1A1:CCL2:ABCC3:PDHA1	http://www.gsea-msigdb.org/gsea/msigdb/human/geneset/MURARO_PANCREAS_DUCTAL_CELL
Cell_type_signature	DESCARTES_FETAL_STOMACH_GOBLET_CELLS	16	4	9.5029e-07	9.85926e-05	UGT2B15:MUC6:MUC5AC:SLC22A8	http://www.gsea-msigdb.org/gsea/msigdb/human/geneset/DESCARTES_FETAL_STOMACH_GOBLET_CELLS
Cell_type_signature	AIZARANI_LIVER_C14_HEPATOCYTES_2	213	9	1.08319e-06	9.98943e-05	FMO3:UGT2B7:CYP3A4:CYP2C9:CYP2C8:CYP2E1:LDHA:CYP1A2:SULT2A1	http://www.gsea-msigdb.org/gsea/msigdb/human/geneset/AIZARANI_LIVER_C14_HEPATOCYTES_2
Cell_type_signature	HE_LIM_SUN_FETAL_LUNG_C1_PROXIMAL_SECRETORY_PROGENITORS_CELL	132	7	4.01641e-06	0.000333362	FMO2:TLR5:MUC20:MUC5B:MUC15:CCL2:SULT2B1	http://www.gsea-msigdb.org/gsea/msigdb/human/geneset/HE_LIM_SUN_FETAL_LUNG_C1_PROXIMAL_SECRETORY_PROGENITORS_CELL
Cell_type_signature	DESCARTES_FETAL_EYE_CORNEAL_AND_CONJUNCTIVAL_EPITHELIAL_CELLS	233	8	1.99009e-05	0.00150161	MUC1:TLR5:MUC20:MUC4:MUC5B:MUC15:SLC16A5:MUC16	http://www.gsea-msigdb.org/gsea/msigdb/human/geneset/DESCARTES_FETAL_EYE_CORNEAL_AND_CONJUNCTIVAL_EPITHELIAL_CELLS
Cell_type_signature	MURARO_PANCREAS_ACINAR_CELL	679	13	2.91342e-05	0.00174368	MUC1:ITGA6:NFE2L2:MUC20:UGT2B15:CYP3A5:LDHA:LDHB:SLC16A7:HIF1A:CYP1A1:CCL2:ABCC3	http://www.gsea-msigdb.org/gsea/msigdb/human/geneset/MURARO_PANCREAS_ACINAR_CELL
Cell_type_signature	DESCARTES_FETAL_SPLEEN_AFP_ALB_POSITIVE_CELLS	179	7	2.92657e-05	0.00174368	FMO5:SULT1C2:SLC2A2:UGT2B4:SULT1E1:CYP3A5:SLC22A9	http://www.gsea-msigdb.org/gsea/msigdb/human/geneset/DESCARTES_FETAL_SPLEEN_AFP_ALB_POSITIVE_CELLS
Cell_type_signature	AIZARANI_LIVER_C30_HEPATOCYTES_4	402	10	2.94114e-05	0.00174368	FMO5:FMO3:CYP3A5:CYP3A4:CYP3A43:CYP2C19:CYP2C9:CYP2C8:ABCC2:ABCC3	http://www.gsea-msigdb.org/gsea/msigdb/human/geneset/AIZARANI_LIVER_C30_HEPATOCYTES_4
Cell_type_signature	BUSSLINGER_GASTRIC_IMMATURE_PIT_CELLS	162	6	0.000149118	0.00825118	MUC1:SULT1C2:ABCC5:CYP3A5:CYP2C18:ABCC3	http://www.gsea-msigdb.org/gsea/msigdb/human/geneset/BUSSLINGER_GASTRIC_IMMATURE_PIT_CELLS
Cell_type_signature	DESCARTES_MAIN_FETAL_HEPATOBLASTS	105	5	0.000169043	0.00876908	UGT2B10:SLC22A7:CYP3A43:ABCC2:SLC22A9	http://www.gsea-msigdb.org/gsea/msigdb/human/geneset/DESCARTES_MAIN_FETAL_HEPATOBLASTS
Cell_type_signature	HE_LIM_SUN_FETAL_LUNG_C1_PROXIMAL_SECRETORY_1_CELL	107	5	0.000184667	0.00901611	MUC20:MUC5B:MUC15:MUC16:SULT2B1	http://www.gsea-msigdb.org/gsea/msigdb/human/geneset/HE_LIM_SUN_FETAL_LUNG_C1_PROXIMAL_SECRETORY_1_CELL
Cell_type_signature	AIZARANI_LIVER_C4_EPCAM_POS_BILE_DUCT_CELLS_1	183	6	0.000288243	0.0128342	FMO5:CYP3A5:CYP3A7:MUC6:ABCC3:SLC5A1	http://www.gsea-msigdb.org/gsea/msigdb/human/geneset/AIZARANI_LIVER_C4_EPCAM_POS_BILE_DUCT_CELLS_1
Cell_type_signature	DESCARTES_MAIN_FETAL_MUC13_DMBT1_POSITIVE_CELLS	65	4	0.000293796	0.0128342	FMO4:MUC7:CYP2C18:CYP2C19	http://www.gsea-msigdb.org/gsea/msigdb/human/geneset/DESCARTES_MAIN_FETAL_MUC13_DMBT1_POSITIVE_CELLS
Cell_type_signature	BUSSLINGER_GASTRIC_ISTHMUS_CELLS	443	9	0.000338196	0.0140351	SLC16A1:MUC1:CYP1B1:SULT1C2:ITGA6:NFE2L2:CYP3A5:CYP2C18:ABCC3	http://www.gsea-msigdb.org/gsea/msigdb/human/geneset/BUSSLINGER_GASTRIC_ISTHMUS_CELLS
Cell_type_signature	HE_LIM_SUN_FETAL_LUNG_C1_PROXIMAL_SECRETORY_2_CELL	297	7	0.000662	0.0256476	TLR5:MUC20:MUC4:MUC5B:MUC15:MUC16:SULT2B1	http://www.gsea-msigdb.org/gsea/msigdb/human/geneset/HE_LIM_SUN_FETAL_LUNG_C1_PROXIMAL_SECRETORY_2_CELL
Cell_type_signature	DESCARTES_MAIN_FETAL_INTESTINAL_EPITHELIAL_CELLS	81	4	0.000679817	0.0256476	LCT:GBA3:MUC12:MUC2	http://www.gsea-msigdb.org/gsea/msigdb/human/geneset/DESCARTES_MAIN_FETAL_INTESTINAL_EPITHELIAL_CELLS
Cell_type_signature	HE_LIM_SUN_FETAL_LUNG_C1_PROXIMAL_SECRETORY_3_CELL	219	6	0.000744559	0.026367	TLR5:MUC20:MUC4:MUC15:MUC16:SULT2B1	http://www.gsea-msigdb.org/gsea/msigdb/human/geneset/HE_LIM_SUN_FETAL_LUNG_C1_PROXIMAL_SECRETORY_3_CELL
Cell_type_signature	BUSSLINGER_GASTRIC_MATURE_PIT_CELLS	220	6	0.00076242	0.026367	MUC1:SULT1C2:ABCC5:CYP3A5:CYP2C18:ABCC3	http://www.gsea-msigdb.org/gsea/msigdb/human/geneset/BUSSLINGER_GASTRIC_MATURE_PIT_CELLS
Cell_type_signature	DESCARTES_FETAL_CEREBRUM_VASCULAR_ENDOTHELIAL_CELLS	512	9	0.000950862	0.0315686	SLC16A4:SLC16A1:FMO1:MYD88:SULT1B1:SULT1E1:EMCN:ABCB1:SLC22A10	http://www.gsea-msigdb.org/gsea/msigdb/human/geneset/DESCARTES_FETAL_CEREBRUM_VASCULAR_ENDOTHELIAL_CELLS
Cell_type_signature	GAO_LARGE_INTESTINE_24W_C8_GOBLET_CELL	41	3	0.00106533	0.0340086	MUC4:UGT2B7:MUC5B	http://www.gsea-msigdb.org/gsea/msigdb/human/geneset/GAO_LARGE_INTESTINE_24W_C8_GOBLET_CELL
Cell_type_signature	DESCARTES_FETAL_PLACENTA_PAEP_MECOM_POSITIVE_CELLS	161	5	0.00119306	0.0366755	MUC1:MUC20:UGT2B7:UGT8:MUC16	http://www.gsea-msigdb.org/gsea/msigdb/human/geneset/DESCARTES_FETAL_PLACENTA_PAEP_MECOM_POSITIVE_CELLS
Cell_type_signature	DESCARTES_MAIN_FETAL_GOBLET_CELLS	44	3	0.00130952	0.0388179	UGT2B15:MUC6:MUC5AC	http://www.gsea-msigdb.org/gsea/msigdb/human/geneset/DESCARTES_MAIN_FETAL_GOBLET_CELLS
Cell_type_signature	MENON_FETAL_KIDNEY_7_LOOPOF_HENLE_CELLS_DISTAL	249	6	0.00144112	0.0412459	MUC1:CYP1B1:SULT1C2:UGT8:LDHB:PDHA1	http://www.gsea-msigdb.org/gsea/msigdb/human/geneset/MENON_FETAL_KIDNEY_7_LOOPOF_HENLE_CELLS_DISTAL
Cell_type_signature	DURANTE_ADULT_OLFACTORY_NEUROEPITHELIUM_SUSTENTACULAR_CELLS	47	3	0.00158627	0.0437312	MUC1:UGT2A1:UGT2A1:MUC5AC	http://www.gsea-msigdb.org/gsea/msigdb/human/geneset/DURANTE_ADULT_OLFACTORY_NEUROEPITHELIUM_SUSTENTACULAR_CELLS
Cell_type_signature	TRAVAGLINI_LUNG_CLASSICAL_MONOCYTE_CELL	256	6	0.00165844	0.0437312	CYP1B1:TLR2:AHR:TLR4:SULT1A1:SULF2	http://www.gsea-msigdb.org/gsea/msigdb/human/geneset/TRAVAGLINI_LUNG_CLASSICAL_MONOCYTE_CELL
Cell_type_signature	HE_LIM_SUN_FETAL_LUNG_C2_SPP1_POS_MACROPHAGE_CELL	48	3	0.00168602	0.0437312	ABCC5:ABCG2:CCL2	http://www.gsea-msigdb.org/gsea/msigdb/human/geneset/HE_LIM_SUN_FETAL_LUNG_C2_SPP1_POS_MACROPHAGE_CELL
Cell_type_signature	BUSSLINGER_DUODENAL_EARLY_IMMATURE_ENTEROCYTES	105	4	0.00178516	0.0448994	SLC2A2:GBA3:UGT2B17:SLC5A1	http://www.gsea-msigdb.org/gsea/msigdb/human/geneset/BUSSLINGER_DUODENAL_EARLY_IMMATURE_ENTEROCYTES
Cell_type_signature	AIZARANI_LIVER_C24_EPCAM_POS_BILE_DUCT_CELLS_3	178	5	0.0018567	0.0453253	MUC1:MUC13:UGT2B15:MUC5B:SLC5A1	http://www.gsea-msigdb.org/gsea/msigdb/human/geneset/AIZARANI_LIVER_C24_EPCAM_POS_BILE_DUCT_CELLS_3
microRNA_targets	MIR6736_3P	123	9	9.8204e-09	2.55134e-05	UGT1A8:UGT1A10:UGT1A9:UGT1A7:UGT1A6:UGT1A5:UGT1A4:UGT1A3:UGT1A1:LDHA	http://www.gsea-msigdb.org/gsea/msigdb/human/geneset/MIR6736_3P
microRNA_targets	MIR6507_5P	329	12	8.06568e-08	7.93042e-05	UGT1A8:UGT1A10:UGT1A9:UGT1A7:UGT1A6:UGT1A5:UGT1A4:UGT1A3:UGT1A1:ABCG2:AHR:HIF1A:CYP1A2	http://www.gsea-msigdb.org/gsea/msigdb/human/geneset/MIR6507_5P
microRNA_targets	MIR4786_3P	159	9	9.15753e-08	7.93042e-05	UGT1A8:UGT1A10:UGT1A9:UGT1A7:UGT1A6:UGT1A5:UGT1A4:UGT1A3:UGT1A1:UGT2B17	http://www.gsea-msigdb.org/gsea/msigdb/human/geneset/MIR4786_3P
microRNA_targets	MIR185_3P	147	8	6.58648e-07	0.000427792	UGT1A8:UGT1A10:UGT1A9:UGT1A7:UGT1A6:UGT1A5:UGT1A4:UGT1A3:UGT1A1	http://www.gsea-msigdb.org/gsea/msigdb/human/geneset/MIR185_3P
microRNA_targets	MIR6839_3P	152	8	8.48914e-07	0.000441096	UGT1A8:UGT1A10:UGT1A9:UGT1A7:UGT1A6:UGT1A5:UGT1A4:UGT1A3:UGT1A1	http://www.gsea-msigdb.org/gsea/msigdb/human/geneset/MIR6839_3P
microRNA_targets	MIR4496	283	10	1.36289e-06	0.000590131	UGT1A8:UGT1A10:UGT1A9:UGT1A7:UGT1A6:UGT1A5:UGT1A4:UGT1A3:UGT1A1:AHR:CDKN1B	http://www.gsea-msigdb.org/gsea/msigdb/human/geneset/MIR4496
Cancer_modules	MODULE_106	12	8	1.26686e-16	5.46017e-14	CYP1B1:CYP3A4:CYP2C18:CYP2C19:CYP2C9:CYP2C8:CYP2E1:CYP1A1	http://www.gsea-msigdb.org/gsea/msigdb/human/geneset/MODULE_106
Cancer_modules	MODULE_135	21	9	3.32631e-16	7.1682e-14	FMO3:FMO4:CYP1B1:CYP3A4:CYP2C18:CYP2C19:CYP2C8:CYP2E1:CYP1A1	http://www.gsea-msigdb.org/gsea/msigdb/human/geneset/MODULE_135
Cancer_modules	MODULE_93	175	12	6.46674e-11	9.29055e-09	AKR7A2:FMO5:FMO3:FMO4:CYP1B1:CYP3A5:CYP3A4:CYP2C19:CYP2C8:LDHA:CYP1A1:COMT	http://www.gsea-msigdb.org/gsea/msigdb/human/geneset/MODULE_93
Cancer_modules	MODULE_71	21	6	6.20132e-10	6.68192e-08	SLC16A4:SLC16A1:ABCC3:SLC16A5:SLC16A8:SLC16A2	http://www.gsea-msigdb.org/gsea/msigdb/human/geneset/MODULE_71
Cancer_modules	MODULE_212	311	13	4.45808e-09	3.84287e-07	ABCD3:FMO3:FMO4:UGT2B15:UGT2B7:SULT1E1:CYP3A4:CYP2C8:LDHA:CYP1A1:ABCC1:ABCC3:COMT	http://www.gsea-msigdb.org/gsea/msigdb/human/geneset/MODULE_212
Cancer_modules	MODULE_186	18	5	2.10583e-08	1.51268e-06	SLC16A4:SLC16A1:ABCC3:SLC16A8:SLC16A2	http://www.gsea-msigdb.org/gsea/msigdb/human/geneset/MODULE_186
Cancer_modules	MODULE_505	13	4	3.77596e-07	2.11471e-05	UGT2B15:UGT2B7:UGT2B4:SULT1E1	http://www.gsea-msigdb.org/gsea/msigdb/human/geneset/MODULE_505
Cancer_modules	MODULE_43	94	7	4.06552e-07	2.11471e-05	FMO3:FMO4:CYP3A4:CYP2C19:CYP2C8:LDHA:CYP1A1	http://www.gsea-msigdb.org/gsea/msigdb/human/geneset/MODULE_43
Cancer_modules	MODULE_23	542	14	4.41587e-07	2.11471e-05	FMO5:MUC1:FMO3:FMO4:UGT2B15:UGT2B7:UGT2B4:CYP3A4:CYP2C19:CYP2C9:CYP2C8:CYP2E1:CCL2:ABCC3	http://www.gsea-msigdb.org/gsea/msigdb/human/geneset/MODULE_23
Cancer_modules	MODULE_227	15	4	7.15423e-07	3.08347e-05	UGT1A6:UGT2B15:UGT2B7:UGT2B4	http://www.gsea-msigdb.org/gsea/msigdb/human/geneset/MODULE_227
Cancer_modules	MODULE_368	18	4	1.58568e-06	6.213e-05	SLC16A4:SLC16A6:SLC16A8:SLC16A2	http://www.gsea-msigdb.org/gsea/msigdb/human/geneset/MODULE_368
Cancer_modules	MODULE_55	800	16	1.86693e-06	6.63389e-05	SLC16A4:FMO5:MUC1:FMO3:FMO4:ITGA6:UGT2B15:UGT2B7:UGT2B4:CYP2C19:CYP2C8:CYP2E1:MUC5B:SLC22A6:CCL2:ABCC3	http://www.gsea-msigdb.org/gsea/msigdb/human/geneset/MODULE_55
Cancer_modules	MODULE_218	19	4	2.00094e-06	6.63389e-05	SLC16A4:SLC16A7:SLC16A8:SLC16A2	http://www.gsea-msigdb.org/gsea/msigdb/human/geneset/MODULE_218
Cancer_modules	MODULE_88	802	15	8.98025e-06	0.000276463	SLC16A4:FMO5:MUC1:FMO3:FMO4:ITGA6:UGT2B15:UGT2B7:CYP2C19:CYP2C8:CYP2E1:MUC5B:SLC22A6:CCL2:ABCC3	http://www.gsea-msigdb.org/gsea/msigdb/human/geneset/MODULE_88
Cancer_modules	MODULE_117	697	13	3.81426e-05	0.00109596	SULT1C2:UGT1A4:SLC2A2:UGT2B17:UGT2B7:UGT2B4:UGT2A1:UGT2A1:SULT1B1:UGT8:CYP3A4:CYP2C8:CYP1A1:SLC16A2	http://www.gsea-msigdb.org/gsea/msigdb/human/geneset/MODULE_117
Cancer_modules	MODULE_162	19	3	0.000104744	0.00282154	SLC16A4:SLC16A7:SLC16A2	http://www.gsea-msigdb.org/gsea/msigdb/human/geneset/MODULE_162
Cancer_modules	MODULE_247	35	3	0.000668213	0.0169412	FMO4:SULT1C2:UGT2B15	http://www.gsea-msigdb.org/gsea/msigdb/human/geneset/MODULE_247
Chemical_and_Genetic_pertubation	YAMASHITA_LIVER_CANCER_STEM_CELL_DN	73	10	2.58446e-12	5.87941e-09	FMO3:FMO4:SULT1C2:UGT2B15:UGT2B7:ABCB1:CYP3A4:CYP2C8:CYP1A2:SULT2A1	http://www.gsea-msigdb.org/gsea/msigdb/human/geneset/YAMASHITA_LIVER_CANCER_STEM_CELL_DN
Chemical_and_Genetic_pertubation	CARRILLOREIXACH_HEPATOBLASTOMA_VS_NORMAL_DN	1110	27	3.4534e-12	5.87941e-09	FMO3:FMO4:UGT1A9:UGT1A7:UGT1A6:UGT1A4:GBA3:UGT2B15:UGT2B7:UGT2A1:UGT2A1:ABCG2:SLC22A7:CYP3A4:CYP3A43:CYP2C18:CYP2C19:CYP2C8:MUC6:SLC22A10:CYP1A1:CYP1A2:SULT1A2:SULT1A1:ABCC3:SULT2A1:SLC5A1:SLC16A2	http://www.gsea-msigdb.org/gsea/msigdb/human/geneset/CARRILLOREIXACH_HEPATOBLASTOMA_VS_NORMAL_DN
Chemical_and_Genetic_pertubation	HSIAO_LIVER_SPECIFIC_GENES	233	13	1.31632e-10	1.49402e-07	FMO5:FMO3:UGT1A10:SLC2A2:UGT2B15:UGT2B7:UGT2B4:CYP3A4:CYP2C18:CYP2C9:ABCC2:CYP2E1:SULT2A1	http://www.gsea-msigdb.org/gsea/msigdb/human/geneset/HSIAO_LIVER_SPECIFIC_GENES
Chemical_and_Genetic_pertubation	VECCHI_GASTRIC_CANCER_EARLY_DN	359	15	2.6812e-10	2.28238e-07	FMO5:CYP1B1:SLC2A2:UGT2B17:UGT2B15:UGT2B11:SULT1B1:SULT1E1:CYP3A4:CYP2C18:CYP2C19:CYP2C9:LDHB:SLC16A7:SULT2A1	http://www.gsea-msigdb.org/gsea/msigdb/human/geneset/VECCHI_GASTRIC_CANCER_EARLY_DN
Chemical_and_Genetic_pertubation	FLECHNER_BIOPSY_KIDNEY_TRANSPLANT_REJECTED_VS_OK_DN	529	17	9.01022e-10	5.65303e-07	AKR7A2:ABCD3:SLC16A4:FMO1:SULT1C2:ITGA6:UGT1A10:UGT2B15:UGT2B7:UGT8:ABCB1:CYP3A5:ABCC2:SLC22A6:SLC16A7:ABCC4:COMT	http://www.gsea-msigdb.org/gsea/msigdb/human/geneset/FLECHNER_BIOPSY_KIDNEY_TRANSPLANT_REJECTED_VS_OK_DN
Chemical_and_Genetic_pertubation	CHIANG_LIVER_CANCER_SUBCLASS_PROLIFERATION_DN	174	11	9.96129e-10	5.65303e-07	FMO3:FMO4:UGT1A10:SLC2A2:SULT1B1:CYP3A43:CYP2C9:CYP2C8:CYP1A2:SULT2A1:SLC16A2	http://www.gsea-msigdb.org/gsea/msigdb/human/geneset/CHIANG_LIVER_CANCER_SUBCLASS_PROLIFERATION_DN
Chemical_and_Genetic_pertubation	OHGUCHI_LIVER_HNF4A_TARGETS_UP	48	6	1.2592e-07	6.12513e-05	FMO3:SULT1E1:ABCB1:SLC22A9:SLC16A7:SULT2A1	http://www.gsea-msigdb.org/gsea/msigdb/human/geneset/OHGUCHI_LIVER_HNF4A_TARGETS_UP
Chemical_and_Genetic_pertubation	RICKMAN_HEAD_AND_NECK_CANCER_E	83	7	1.72386e-07	7.33717e-05	FMO3:FMO2:UGT1A10:MUC20:MUC4:CYP2C18:CYP2E1	http://www.gsea-msigdb.org/gsea/msigdb/human/geneset/RICKMAN_HEAD_AND_NECK_CANCER_E
Chemical_and_Genetic_pertubation	SAENZ_DETOX_PATHWAY_AND_CARCINOGENESIS_DN	13	4	3.77596e-07	0.000142857	CYP3A5:CYP2C19:CYP2C8:ABCC2	http://www.gsea-msigdb.org/gsea/msigdb/human/geneset/SAENZ_DETOX_PATHWAY_AND_CARCINOGENESIS_DN
Chemical_and_Genetic_pertubation	YOSHIMURA_MAPK8_TARGETS_UP	1228	21	5.08324e-07	0.000173084	ARNT:MUC1:SULT1C2:LCT:UGT1A10:MUC13:UGT2B7:UGT2A1:UGT2A1:SULT1E1:SLC22A7:TLR4:CYP2C18:CYP2C8:CYP2E1:MUC2:KCNJ11:SLC22A9:CYP1A1:CCL2:SULT2A1:SLC5A1	http://www.gsea-msigdb.org/gsea/msigdb/human/geneset/YOSHIMURA_MAPK8_TARGETS_UP
Chemical_and_Genetic_pertubation	WINTER_HYPOXIA_METAGENE	230	9	2.04318e-06	0.000615017	SLC16A1:MUC1:ABCB1:LDHA:CDKN1B:LDHB:HIF1A:PDK3:SLC16A2	http://www.gsea-msigdb.org/gsea/msigdb/human/geneset/WINTER_HYPOXIA_METAGENE
Chemical_and_Genetic_pertubation	WOO_LIVER_CANCER_RECURRENCE_DN	77	6	2.16746e-06	0.000615017	FMO4:SLC2A2:SULT1B1:CYP3A43:CYP2E1:SULT2A1	http://www.gsea-msigdb.org/gsea/msigdb/human/geneset/WOO_LIVER_CANCER_RECURRENCE_DN
Chemical_and_Genetic_pertubation	LEE_LIVER_CANCER_SURVIVAL_UP	176	8	2.5537e-06	0.000668873	FMO3:UGT1A6:SLC2A2:UGT2B15:UGT2B4:CYP3A4:ABCC2:SULT2A1	http://www.gsea-msigdb.org/gsea/msigdb/human/geneset/LEE_LIVER_CANCER_SURVIVAL_UP
Chemical_and_Genetic_pertubation	SERVITJA_LIVER_HNF1A_TARGETS_UP	132	7	4.01641e-06	0.000976848	FMO3:SULT1E1:SLC22A5:ABCB1:CYP2C19:ABCC4:ABCC3	http://www.gsea-msigdb.org/gsea/msigdb/human/geneset/SERVITJA_LIVER_HNF1A_TARGETS_UP
Chemical_and_Genetic_pertubation	MEBARKI_HCC_PROGENITOR_FZD8CRD_DN	424	11	7.80599e-06	0.00167514	SULT1C2:SLC2A2:MUC20:GBA3:UGT2A3:ABCB1:CYP3A5:CYP2C8:MUC15:SLC22A9:SULT2A1	http://www.gsea-msigdb.org/gsea/msigdb/human/geneset/MEBARKI_HCC_PROGENITOR_FZD8CRD_DN
Chemical_and_Genetic_pertubation	CAIRO_HEPATOBLASTOMA_CLASSES_DN	205	8	7.87142e-06	0.00167514	FMO3:FMO4:UGT2B4:SULT1B1:EMCN:CYP2C9:CYP2E1:CYP1A1	http://www.gsea-msigdb.org/gsea/msigdb/human/geneset/CAIRO_HEPATOBLASTOMA_CLASSES_DN
Chemical_and_Genetic_pertubation	SERVITJA_LIVER_HNF1A_TARGETS_DN	162	7	1.53882e-05	0.00308217	FMO5:UGT2B17:UGT2A3:UGT2B7:UGT2B28:SLC22A7:CYP2C19	http://www.gsea-msigdb.org/gsea/msigdb/human/geneset/SERVITJA_LIVER_HNF1A_TARGETS_DN
Chemical_and_Genetic_pertubation	CHIANG_LIVER_CANCER_SUBCLASS_CTNNB1_UP	171	7	2.18214e-05	0.00412788	SLC16A4:SLC16A1:SULT1B1:ABCG2:CYP2E1:SLC22A11:CYP1A1	http://www.gsea-msigdb.org/gsea/msigdb/human/geneset/CHIANG_LIVER_CANCER_SUBCLASS_CTNNB1_UP
Chemical_and_Genetic_pertubation	OISHI_CHOLANGIOMA_STEM_CELL_LIKE_DN	264	8	4.83701e-05	0.00866843	MUC1:FMO2:CYP1B1:MYD88:SULT1B1:SULT1E1:AHR:MUC5B	http://www.gsea-msigdb.org/gsea/msigdb/human/geneset/OISHI_CHOLANGIOMA_STEM_CELL_LIKE_DN
Chemical_and_Genetic_pertubation	SMID_BREAST_CANCER_LUMINAL_B_DN	536	11	6.6853e-05	0.0113041	SLC16A1:FMO2:CYP1B1:ITGA6:EMCN:UGT8:ABCC2:LDHB:ABCC4:CCL2:MUC16	http://www.gsea-msigdb.org/gsea/msigdb/human/geneset/SMID_BREAST_CANCER_LUMINAL_B_DN
Chemical_and_Genetic_pertubation	ENGELMANN_CANCER_PROGENITORS_UP	45	4	6.97169e-05	0.0113041	NFE2L2:ABCG2:CYP1A1:SULT1A1	http://www.gsea-msigdb.org/gsea/msigdb/human/geneset/ENGELMANN_CANCER_PROGENITORS_UP
Chemical_and_Genetic_pertubation	TUOMISTO_TUMOR_SUPPRESSION_BY_COL13A1_DN	18	3	8.85213e-05	0.0137007	CYP2C19:CYP2E1:CYP1A1	http://www.gsea-msigdb.org/gsea/msigdb/human/geneset/TUOMISTO_TUMOR_SUPPRESSION_BY_COL13A1_DN
Chemical_and_Genetic_pertubation	DESERT_PERIVENOUS_HEPATOCELLULAR_CARCINOMA_SUBCLASS_UP	150	6	9.78009e-05	0.0144788	FMO3:CYP3A4:CYP2E1:CYP1A1:CYP1A2:SULT2A1	http://www.gsea-msigdb.org/gsea/msigdb/human/geneset/DESERT_PERIVENOUS_HEPATOCELLULAR_CARCINOMA_SUBCLASS_UP
Chemical_and_Genetic_pertubation	BANDRES_RESPONSE_TO_CARMUSTIN_MGMT_48HR_UP	19	3	0.000104744	0.0148535	UGT8:CCL2:SLC16A2	http://www.gsea-msigdb.org/gsea/msigdb/human/geneset/BANDRES_RESPONSE_TO_CARMUSTIN_MGMT_48HR_UP
Chemical_and_Genetic_pertubation	SMIRNOV_CIRCULATING_ENDOTHELIOCYTES_IN_CANCER_UP	153	6	0.000109057	0.0148535	CYP1B1:TLR2:ABCB1:CYP1A1:NOD2:SLC16A6	http://www.gsea-msigdb.org/gsea/msigdb/human/geneset/SMIRNOV_CIRCULATING_ENDOTHELIOCYTES_IN_CANCER_UP
Chemical_and_Genetic_pertubation	DESERT_PERIPORTAL_HEPATOCELLULAR_CARCINOMA_SUBCLASS_UP	155	6	0.000117116	0.0153376	GBA3:SLC22A7:CYP3A43:CYP2C18:CYP2C9:CYP2C8	http://www.gsea-msigdb.org/gsea/msigdb/human/geneset/DESERT_PERIPORTAL_HEPATOCELLULAR_CARCINOMA_SUBCLASS_UP
Chemical_and_Genetic_pertubation	OHGUCHI_LIVER_HNF4A_TARGETS_DN	161	6	0.000144165	0.0181808	UGT2B17:UGT2A3:UGT2B28:SULT1B1:SLC22A7:SULT2A1	http://www.gsea-msigdb.org/gsea/msigdb/human/geneset/OHGUCHI_LIVER_HNF4A_TARGETS_DN
Chemical_and_Genetic_pertubation	LIU_OVARIAN_CANCER_TUMORS_AND_XENOGRAFTS_XDGS_DN	1525	19	0.000152494	0.0185444	FMO3:FMO2:FMO1:CYP1B1:SULT1C4:ABCG2:EMCN:TLR2:AHR:ABCB1:SULF1:TLR4:SLC16A7:NOD2:CCL2:ABCC3:SLC16A6:SULF2:SLC16A2	http://www.gsea-msigdb.org/gsea/msigdb/human/geneset/LIU_OVARIAN_CANCER_TUMORS_AND_XENOGRAFTS_XDGS_DN
Chemical_and_Genetic_pertubation	JINESH_BLEBBISHIELD_TRANSFORMED_STEM_CELL_SPHERES_UP	166	6	0.000170294	0.0199948	CYP1B1:UGT1A7:ABCC5:CYP3A5:CYP1A2:SLC16A5	http://www.gsea-msigdb.org/gsea/msigdb/human/geneset/JINESH_BLEBBISHIELD_TRANSFORMED_STEM_CELL_SPHERES_UP
Chemical_and_Genetic_pertubation	WUNDER_INFLAMMATORY_RESPONSE_AND_CHOLESTEROL_UP	58	4	0.000189026	0.0211858	SLC16A1:UGT2B28:TLR2:MUC17:RN7SKP54	http://www.gsea-msigdb.org/gsea/msigdb/human/geneset/WUNDER_INFLAMMATORY_RESPONSE_AND_CHOLESTEROL_UP
Chemical_and_Genetic_pertubation	SERVITJA_ISLET_HNF1A_TARGETS_DN	108	5	0.000192881	0.0211858	SULT1C2:UGT1A1:SLC2A2:MUC4:UGT2B7	http://www.gsea-msigdb.org/gsea/msigdb/human/geneset/SERVITJA_ISLET_HNF1A_TARGETS_DN
Chemical_and_Genetic_pertubation	BOSCO_EPITHELIAL_DIFFERENTIATION_MODULE	61	4	0.000229891	0.0244618	MUC1:MUC4:MUC21:MUC16	http://www.gsea-msigdb.org/gsea/msigdb/human/geneset/BOSCO_EPITHELIAL_DIFFERENTIATION_MODULE
Chemical_and_Genetic_pertubation	CAIRO_HEPATOBLASTOMA_DN	254	7	0.000259939	0.026821	GBA3:SLC22A7:CYP3A5:CYP2C18:CYP2C19:CYP2C8:CYP1A2	http://www.gsea-msigdb.org/gsea/msigdb/human/geneset/CAIRO_HEPATOBLASTOMA_DN
Chemical_and_Genetic_pertubation	TONKS_TARGETS_OF_RUNX1_RUNX1T1_FUSION_HSC_DN	185	6	0.00030552	0.0305969	CYP1B1:ITGA6:SLC16A7:ABCC4:NOD2:CCL2	http://www.gsea-msigdb.org/gsea/msigdb/human/geneset/TONKS_TARGETS_OF_RUNX1_RUNX1T1_FUSION_HSC_DN
Chemical_and_Genetic_pertubation	SANSOM_APC_TARGETS_DN	348	8	0.000322212	0.0313466	LCT:SLC2A2:UGT2B28:ABCC2:KCNJ11:ABCC3:SULT2B1:SLC5A1	http://www.gsea-msigdb.org/gsea/msigdb/human/geneset/SANSOM_APC_TARGETS_DN
Chemical_and_Genetic_pertubation	SOGA_COLORECTAL_CANCER_MYC_DN	68	4	0.000349429	0.0330501	GBA3:UGT2A3:SLC22A5:SULT1A2	http://www.gsea-msigdb.org/gsea/msigdb/human/geneset/SOGA_COLORECTAL_CANCER_MYC_DN
Chemical_and_Genetic_pertubation	ANDERSEN_LIVER_CANCER_KRT19_DN	72	4	0.000434832	0.0389632	UGT2B17:UGT2B15:SLC22A7:CYP3A4	http://www.gsea-msigdb.org/gsea/msigdb/human/geneset/ANDERSEN_LIVER_CANCER_KRT19_DN
Chemical_and_Genetic_pertubation	FRASOR_RESPONSE_TO_ESTRADIOL_DN	72	4	0.000434832	0.0389632	FMO5:MUC1:ABCC5:SLC16A5	http://www.gsea-msigdb.org/gsea/msigdb/human/geneset/FRASOR_RESPONSE_TO_ESTRADIOL_DN
Chemical_and_Genetic_pertubation	PICCALUGA_ANGIOIMMUNOBLASTIC_LYMPHOMA_UP	205	6	0.000526864	0.0459993	CYP1B1:EMCN:SULF1:TLR4:CCL2:ABCC3	http://www.gsea-msigdb.org/gsea/msigdb/human/geneset/PICCALUGA_ANGIOIMMUNOBLASTIC_LYMPHOMA_UP
Chemical_and_Genetic_pertubation	FRASOR_RESPONSE_TO_ESTRADIOL_UP	34	3	0.000613118	0.0489815	CYP1B1:SLC22A5:CYP1A1	http://www.gsea-msigdb.org/gsea/msigdb/human/geneset/FRASOR_RESPONSE_TO_ESTRADIOL_UP
Chemical_and_Genetic_pertubation	SCHOEN_NFKB_SIGNALING	34	3	0.000613118	0.0489815	SULF1:CDKN1B:CCL2	http://www.gsea-msigdb.org/gsea/msigdb/human/geneset/SCHOEN_NFKB_SIGNALING
Chemical_and_Genetic_pertubation	VECCHI_GASTRIC_CANCER_ADVANCED_VS_EARLY_DN	139	5	0.000616906	0.0489815	FMO5:MUC1:SULT1C2:ABCG2:SULT1A2	http://www.gsea-msigdb.org/gsea/msigdb/human/geneset/VECCHI_GASTRIC_CANCER_ADVANCED_VS_EARLY_DN
Chemical_and_Genetic_pertubation	CHIANG_LIVER_CANCER_SUBCLASS_UNANNOTATED_UP	79	4	0.000618563	0.0489815	ARNT:MUC20:CYP2C19:CYP1A2	http://www.gsea-msigdb.org/gsea/msigdb/human/geneset/CHIANG_LIVER_CANCER_SUBCLASS_UNANNOTATED_UP
